# Supplementary material for: Doublecortin and JIP3 are neural-specific counteracting regulators of dynein-mediated retrograde trafficking
Source: eLife. 2022 Dec 7;11:e82218. doi: 10.7554/eLife.82218 (PMC9799976; doi:10.7554/eLife.82218)
Supplement: Table 1—source data 1. [file elife-82218-table1-data1.xlsx]

## Sheet: Protein Groups 
Protein IDs	Protein names	Gene names	Score	Sequence coverage HA-control [%]	Sequence coverage HA-control2[%]	Sequence coverage +HA-DCX [%]	Sequence coverage HA-DCX2 [%]	Normalized intensity HA-control	Normalized HA-control2	Normalized HA-DCX	Normalized HA-DCX 2	Normalized HA average	Normalized HA-DCX average	HA-DCX/HA
Q8BHN3	Neutral alpha-glucosidase AB	Ganab	151.82	0	0	21.3	17.9	0	0	299620000	317120000	0	308370000	#DIV/0!
P14211	Calreticulin	Calr	141.76	0	0	42.8	44.2	0	0	2117400000	2061300000	0	2089350000	#DIV/0!
Q9WUU7	Cathepsin Z	Ctsz	129.23	0	0	30.4	39.9	0	0	2019200000	2001900000	0	2010550000	#DIV/0!
P17427;A0A0J9YUA7	AP-2 complex subunit alpha-2	Ap2a2	116.67	2.2	3.5	14.6	16	0	0	174740000	175280000	0	175010000	#DIV/0!
Q9D8X2	Coiled-coil domain-containing protein 124	Ccdc124	103.75	9.7	9.7	18.4	18	0	0	147600000	131740000	0	139670000	#DIV/0!
P09405	Nucleolin	Ncl	100.24	0	0	18.7	19.2	0	0	447760000	468310000	0	458035000	#DIV/0!
Q76MZ3;G3UWL2;H3BIV7;H3BLQ0;H3BLE7;Q3TTF6;H3BKU1;G3UWS4;Q7TNP2	Serine/threonine-protein phosphatase 2A 65 kDa regulatory subunit A alpha isoform	Ppp2r1a	87.052	4.1	4.1	17	19.7	0	0	260590000	260630000	0	260610000	#DIV/0!
Q99JF8;A2BI12;F6RB63;F6W677	PC4 and SFRS1-interacting protein	Psip1	83.825	1.5	7.4	12.5	10.2	0	0	293300000	282320000	0	287810000	#DIV/0!
E0CXB9;Q61301;Q8BS72;A0A0N4SUZ7;P26231	Catenin alpha-2	Ctnna2	83.217	0.9	0.9	13.6	13.1	0	0	158620000	159300000	0	158960000	#DIV/0!
O08599;A0A140LHJ4	Syntaxin-binding protein 1	Stxbp1	79.919	12.3	6.2	11.4	8.1	0	0	65658000	56773000	0	61215500	#DIV/0!
A0A1L1SV25;P57780;E9Q2W9;A0A1L1SVJ6;D3Z761;D3Z0L8;Q9JI91;Q91ZE6;E9PX29;O88990	Alpha-actinin-4	Actn4	76.691	0	0	14.9	15	0	0	256120000	237190000	0	246655000	#DIV/0!
P05202	Aspartate aminotransferase, mitochondrial	Got2	74.793	4.7	9.1	8.6	17	0	0	111090000	0	0	55545000	#DIV/0!
Q8BMK4	Cytoskeleton-associated protein 4	Ckap4	70.635	5.9	8.9	8.2	5.9	0	0	124900000	123330000	0	124115000	#DIV/0!
Q99P72	Reticulon-4	Rtn4	68.833	2.7	2.3	6.1	6.1	0	0	163760000	166350000	0	165055000	#DIV/0!
Q9R1P4;A0A1B0GS70	Proteasome subunit alpha type-1	Psma1	67.791	10.3	12.9	25.1	35.4	0	0	154340000	140080000	0	147210000	#DIV/0!
O88935	Synapsin-1	Syn1	65.081	3.8	10.5	6.8	8.5	0	0	69233000	75630000	0	72431500	#DIV/0!
H7BX95;Q6PDM2;F7AI47;F6QXN3;Q9D0B0	Serine/arginine-rich splicing factor 1	Srsf1	64.908	8.7	8.3	21.3	30.8	0	0	164120000	174330000	0	169225000	#DIV/0!
P70168	Importin subunit beta-1	Kpnb1	63.715	0	1.3	10.2	11.4	0	0	128200000	137800000	0	133000000	#DIV/0!
D3Z4H6;P52912;D3YY02;A0A0N4SVR8;A0A0N4SW78;A0A0U1RPE1;A0A0U1RP00	Nucleolysin TIA-1	Tia1	58.931	7.5	3.1	21.6	21.6	0	0	205320000	224210000	0	214765000	#DIV/0!
Q8R326;F7D909	Paraspeckle component 1	Pspc1	57.639	6.1	5.9	9	5.9	0	0	248400000	222780000	0	235590000	#DIV/0!
Q3TLP8;P63001;Q05144;A0A2R8VHH0;A0A2R8VH29;A0A1B0GSL4;G3UZM2;D3Z3L1;F2Z463;D3YX61;P84096;Q8R527;Q9ER71	Ras-related C3 botulinum toxin substrate 1;Ras-related C3 botulinum toxin substrate 2	Rac1;Rac2	57.257	17.1	28	12.3	21.3	0	0	219400000	175970000	0	197685000	#DIV/0!
F6QYF8;Q11011;E9Q039;E9Q6F4;F7ANF4	Puromycin-sensitive aminopeptidase	Npepps	57.113	3.1	4.7	6.3	6.1	0	0	137760000	150940000	0	144350000	#DIV/0!
A0A3Q4EH04;A0A3Q4L335;A0A3Q4L393;Q8BL97;A0A3Q4EGP0	Serine/arginine-rich splicing factor 7	Srsf7	56.28	19.7	16.8	34.3	30.7	0	0	294180000	272250000	0	283215000	#DIV/0!
Q61937;Q9DAY9;Q5SQB0;Q5SQB5	Nucleophosmin	Npm1	55.367	7.5	7.5	18.5	25.7	0	0	173700000	167740000	0	170720000	#DIV/0!
Q02248;F7BAC9;E9Q6A9;F7CRC6	Catenin beta-1	Ctnnb1	55.308	1.9	1.9	12.4	9.6	0	0	138130000	129860000	0	133995000	#DIV/0!
P05213;A0A0A0MQA5;P68368;A0A2R8VHF3;A0A087WRB4;A0A087WQS4;A0A087WSB0;A0A087WSL5	Tubulin alpha-1B chain;Tubulin alpha-4A chain	Tuba1b;Tuba4a	52.089	28.8	35.7	71.8	76.1	0	0	648740000	551800000	0	600270000	#DIV/0!
Q9Z2U1	Proteasome subunit alpha type-5	Psma5	51.748	0	7.9	36.1	36.1	0	0	367730000	329780000	0	348755000	#DIV/0!
P62814;Q91YH6;A0A0U1RNU9	V-type proton ATPase subunit B, brain isoform	Atp6v1b2;Atp6v1b1	50.333	7.2	5.1	10.2	10	0	0	71862000	66565000	0	69213500	#DIV/0!
A0A0G2JEG8;A0A668KM31;Q7TQF7	Amphiphysin	Amph	48.409	1.4	1.4	8.8	7.4	0	0	55926000	63518000	0	59722000	#DIV/0!
P35564	Calnexin	Canx	47.695	0	0	15.2	10	0	0	325980000	367420000	0	346700000	#DIV/0!
Q60865;A2BH47;F6YP03	Caprin-1	Caprin1	46.864	1.6	3.1	9.8	6.9	0	0	190340000	222210000	0	206275000	#DIV/0!
F8WHM5;Q61543;F6RSH1	Golgi apparatus protein 1	Glg1	45.82	2.1	2.1	7	6	0	0	62526000	59083000	0	60804500	#DIV/0!
Q921F2;A0A087WR97;A0A087WRZ5;Q8R0B4;Q8BLD4;Q6VYI5;Q6VYI4;A0A087WSE4;A0A087WQA5;A0A087WS17;A0A087WQX8;A0A087WNY6;A0A087WS74;A0A087WRP4;H3BJV1;A0A087WSH7;A0A087WP57	TAR DNA-binding protein 43	Tardbp	45.563	10.1	7.5	13	18.8	0	0	143740000	165090000	0	154415000	#DIV/0!
P84104	Serine/arginine-rich splicing factor 3	Srsf3	45.548	13.4	22	33.5	33.5	0	0	267070000	282240000	0	274655000	#DIV/0!
Q9Z2U0;A0A338P7D7;Q9CWH6;B7ZMS4;A0A3Q4L361;A0A3Q4EHS3;A0A3Q4EG42	Proteasome subunit alpha type-7;Proteasome subunit alpha type-7-like	Psma7;Psma8	44.549	0	4.4	38.7	38.7	0	0	348120000	294800000	0	321460000	#DIV/0!
Q9DCT8;A0A0G2JF37	Cysteine-rich protein 2	Crip2	43.87	7.7	11.5	47.1	36.5	0	0	263940000	253810000	0	258875000	#DIV/0!
Q9QUM9;E0CXB1;E0CYT2	Proteasome subunit alpha type-6	Psma6	43.243	4.9	9.8	20.3	15	0	0	192170000	179410000	0	185790000	#DIV/0!
P63089;Q3UZI5	Pleiotrophin	Ptn	43.219	0	6.5	31	26.2	0	0	421940000	424170000	0	423055000	#DIV/0!
P04925	Major prion protein	Prnp	42.501	4.7	9.1	18.9	18.9	0	0	73520000	73287000	0	73403500	#DIV/0!
P11031	Activated RNA polymerase II transcriptional coactivator p15	Sub1	42.094	15.7	15.7	30.7	30.7	0	0	436310000	447800000	0	442055000	#DIV/0!
O54774	AP-3 complex subunit delta-1	Ap3d1	41.531	1.3	0	3.8	3.4	0	0	104000000	0	0	52000000	#DIV/0!
Q9QUI0;A0A0A6YXF6;Q62159;H3BL56;A0A0G2JEP8;A0A0A6YWJ1;Q9CR99	Transforming protein RhoA;Rho-related GTP-binding protein RhoC	Rhoa;Rhoc	41.233	16.1	5.7	20.2	20.2	0	0	193340000	213510000	0	203425000	#DIV/0!
Q80X50;A0A0H2UH17;A0A0G2JDV6;A0A0G2JGD0;A0A0G2JG47;A0A0G2JE24;A0A0G2JDT1	Ubiquitin-associated protein 2-like	Ubap2l	40.794	1	1	5.3	7.5	0	0	110320000	104790000	0	107555000	#DIV/0!
B7ZNL2;Q78ZA7;A0A140LJB5;A0A140LJ37	Nucleosome assembly protein 1-like 4	Nap1l4	39.819	2.6	5.4	14.8	14.5	0	0	240440000	239320000	0	239880000	#DIV/0!
P56391;A0A140LIU3	Cytochrome c oxidase subunit 6B1	Cox6b1	38.967	33.7	33.7	41.9	51.2	0	0	134770000	123360000	0	129065000	#DIV/0!
O70435;E0CX62;E0CZ34;F8WH02;E0CYL6	Proteasome subunit alpha type-3	Psma3	38.855	5.5	4.7	20.4	17.6	0	0	105930000	89855000	0	97892500	#DIV/0!
A0A0R4J2B0;V9GX43;S4R2U7;S4R1S7;E9QA47;Q9Z0H4;S4R2J2;S4R2L5;A3KGT0;S4R2S7;S4R2U1;A0A0R4J0T5;P28659	CUGBP Elav-like family member 2	Celf2	38.559	4.1	8.2	10.7	10	0	0	83879000	84138000	0	84008500	#DIV/0!
Q9D6F9	Tubulin beta-4A chain	Tubb4a	38.23	37.6	31.3	71.6	66.2	0	0	100340000	83076000	0	91708000	#DIV/0!
P24547;A0A0A6YY72;E0CXK0;A0A0A6YXS4;E0CYE2;F7DEU6;P50096	Inosine-5-monophosphate dehydrogenase 2	Impdh2	38.223	2.3	2.3	7.6	2.3	0	0	103530000	0	0	51765000	#DIV/0!
B7FAV1;B7FAU9;Q8BTM8;F6XC15;Q80X90;Q8VHX6	Filamin-A	Flna	37.964	1.2	1.4	1.4	1.4	0	0	47376000	50044000	0	48710000	#DIV/0!
Q9D819	Inorganic pyrophosphatase	Ppa1	37.858	14.2	6.6	17	17	0	0	89751000	74773000	0	82262000	#DIV/0!
A2AFG7;A2AFG8;Q6PGJ3;P11627	Neural cell adhesion molecule L1	L1cam	37.643	0	0	6.2	4.6	0	0	96672000	99577000	0	98124500	#DIV/0!
Q9CR80	Protein FAM32A	Fam32a	37.48	0	0	16.1	19.6	0	0	0	57351000	0	28675500	#DIV/0!
P49722;Q8BKE0	Proteasome subunit alpha type-2	Psma2	37.368	0	0	25.2	28.6	0	0	117720000	119160000	0	118440000	#DIV/0!
O08795	Glucosidase 2 subunit beta	Prkcsh	36.766	0	0	7.3	11.3	0	0	116320000	112610000	0	114465000	#DIV/0!
Q8K341;F6RPX5;F7CID0;F7BUT2;B8JJ72	Alpha-tubulin N-acetyltransferase 1	Atat1	36.198	6.4	5.7	2.6	8.6	0	0	0	19766000	0	9883000	#DIV/0!
P51150;A0A0N4SVR6;A0A0N4SVG9	Ras-related protein Rab-7a	Rab7a	35.74	16.4	5.3	19.3	14.5	0	0	30320000	42054000	0	36187000	#DIV/0!
E0CXZ9;Q3UPV6;A0A571BGH0;A0A571BF54;A0A571BEM7;P62482;A0A571BFX6;A0A571BE49;E0CXI4	Voltage-gated potassium channel subunit beta-2	Kcnab2	35.733	0	0	12.3	15.7	0	0	53765000	44654000	0	49209500	#DIV/0!
P61164;A0A494BB86;Q8R5C5;E0CZD4;E0CYB4	Alpha-centractin;Beta-centractin	Actr1a;Actr1b	34.991	0	0	22.1	22.1	0	0	219310000	214260000	0	216785000	#DIV/0!
P32067;A2AR07;F6SXM5;D6RI87	Lupus La protein homolog	Ssb	34.665	2.7	0	12.5	12.5	0	0	112340000	110700000	0	111520000	#DIV/0!
Q60932;F2Z471	Voltage-dependent anion-selective channel protein 1	Vdac1	34.273	3.4	11.1	13.5	13.9	0	0	0	153630000	0	76815000	#DIV/0!
P05063	Fructose-bisphosphate aldolase C	Aldoc	33.704	0	3.9	12.1	8.3	0	0	0	87210000	0	43605000	#DIV/0!
Q8R2P8;Q99MN1	Lysine--tRNA ligase	Kars	33.363	0	0	9.5	5.3	0	0	35584000	0	0	17792000	#DIV/0!
A0A6I8MX18;Q8CJG1;H3BJ70;Q8CJF9;H3BL59;Q8CJF8	Protein argonaute-1	Ago1	33.265	1.8	1.1	3.6	3.7	0	0	32166000	0	0	16083000	#DIV/0!
Q62348	Translin	Tsn	33.17	4.4	4.4	18.4	18	0	0	94904000	76670000	0	85787000	#DIV/0!
P97379;A0A0J9YTQ8;A0A0J9YUY8	Ras GTPase-activating protein-binding protein 2	G3bp2	32.835	2.7	2.7	10.6	12.7	0	0	97017000	93278000	0	95147500	#DIV/0!
A0A0R4IZX5;P55066	Neurocan core protein	Ncan	32.575	0.8	0.8	4.1	4.1	0	0	97337000	94084000	0	95710500	#DIV/0!
P67871;G3UXG7;G3UZA4;G3UZJ5;G3UZX4;G3UXU2;G3UWU5	Casein kinase II subunit beta	Csnk2b	32.178	5.1	3.7	18.6	13	0	0	64075000	0	0	32037500	#DIV/0!
A0A0R4J1E3;Q9QXS6;F7CPL2	Drebrin	Dbn1	31.976	0	0	2.4	6.7	0	0	0	134280000	0	67140000	#DIV/0!
Q99KJ8	Dynactin subunit 2	Dctn2	31.892	3.5	0	13.2	9.7	0	0	58894000	75834000	0	67364000	#DIV/0!
Q9WTM5;A0A1B0GSR4;A0A1B0GRW3;A0A1B0GR89;A0A1B0GT54	RuvB-like 2	Ruvbl2	31.891	0	4.8	6	11.2	0	0	37302000	42496000	0	39899000	#DIV/0!
E9Q1S3;Q01405	Protein transport protein Sec23A	Sec23a	31.812	4.5	1.6	5.2	4.1	0	0	42317000	57673000	0	49995000	#DIV/0!
Q9D1Q6	Endoplasmic reticulum resident protein 44	Erp44	31.466	0	0	14.3	10.8	0	0	86429000	87223000	0	86826000	#DIV/0!
Q7TNV0;E9Q8Y1;D3YVJ6	Protein DEK	Dek	31.427	0	3.2	9.2	11.6	0	0	213800000	151300000	0	182550000	#DIV/0!
P63321;A0A1Y7VL93;Q9JIW9	Ras-related protein Ral-A	Rala	31.018	0	0	22.8	20.4	0	0	290830000	289600000	0	290215000	#DIV/0!
Q3TIV5	Zinc finger CCCH domain-containing protein 15	Zc3h15	30.642	2.3	3.3	4.9	9.6	0	0	0	65782000	0	32891000	#DIV/0!
B1AXZ0;Q80UJ0;Q3UR02;Q80Y51;B1AXZ6;B1AXZ4;B1AXZ5;Q60899;A2A9R5;H3BLG7;A2A9R4	ELAV-like protein;ELAV-like protein 2	Elavl2	30.264	3.8	3.8	6.9	14.5	0	0	130340000	112310000	0	121325000	#DIV/0!
P40124;B1ARS0	Adenylyl cyclase-associated protein 1;Adenylyl cyclase-associated protein	Cap1	30.251	4.6	1.9	7.2	3.4	0	0	93126000	0	0	46563000	#DIV/0!
O55234;Q8BTY5	Proteasome subunit beta type-5	Psmb5	28.754	0	0	9.8	12.9	0	0	0	93019000	0	46509500	#DIV/0!
P31324;H3BK84	cAMP-dependent protein kinase type II-beta regulatory subunit	Prkar2b	28.454	0	3.6	12.3	8.4	0	0	75357000	67822000	0	71589500	#DIV/0!
Q07797	Galectin-3-binding protein	Lgals3bp	28.215	0	0	9.4	6.6	0	0	67254000	60096000	0	63675000	#DIV/0!
P62897	Cytochrome c, somatic	Cycs	27.345	10.5	7.6	48.6	35.2	0	0	287490000	275400000	0	281445000	#DIV/0!
E9Q5H2;E9PZF5;P97822;E9Q0X5	Acidic leucine-rich nuclear phosphoprotein 32 family member E	Anp32e	27.078	13.1	0	45.8	45.8	0	0	164940000	145450000	0	155195000	#DIV/0!
D6REG4;Q91Z53;B1AXQ0	Glyoxylate reductase/hydroxypyruvate reductase	Grhpr	26.62	0	0	9.1	14.2	0	0	0	64269000	0	32134500	#DIV/0!
G5E902;Q8VEM8	Phosphate carrier protein, mitochondrial	Slc25a3	26.492	2.2	2.8	6.1	6.1	0	0	76983000	75463000	0	76223000	#DIV/0!
O55125;Q5SVG6	Protein NipSnap homolog 1	Nipsnap1	26.461	0	3.2	10.2	21.8	0	0	56208000	60211000	0	58209500	#DIV/0!
P67778;Q5SQG5	Prohibitin	Phb	26.338	8.1	4.4	18.8	0	0	0	70245000	0	0	35122500	#DIV/0!
A2AUK7;A2AUK8;A2AUK5;E9PV14;Q9Z2H5;A0A2R8VHB6	Band 4.1-like protein 1	Epb4.1l1;Epb41l1	25.804	1.6	3	0	4.4	0	0	0	22220000	0	11110000	#DIV/0!
A0A0R4J093;Q9DBP5	UMP-CMP kinase	Cmpk1	25.789	9.3	14.1	10.1	10.1	0	0	62657000	71089000	0	66873000	#DIV/0!
P12025	Midkine	Mdk	25.276	7.1	0	22.1	17.1	0	0	248430000	224810000	0	236620000	#DIV/0!
P14094;A0A0A6YX05	Sodium/potassium-transporting ATPase subunit beta-1	Atp1b1	25.179	3.6	3.6	12.5	8.2	0	0	94676000	85291000	0	89983500	#DIV/0!
Q99N15;A2AFQ2;O08756	3-hydroxyacyl-CoA dehydrogenase type-2	Hsd17b10	25.106	4.6	9.2	15.3	7.7	0	0	53983000	44507000	0	49245000	#DIV/0!
A2BFF8;Q3TPJ8;A2BFF5;A2BFF9;O88487;Q3TYJ3;D3Z0M6;O88485	Cytoplasmic dynein 1 intermediate chain 2	Dync1i2	25.011	0	0	7.7	4.3	0	0	31695000	37437000	0	34566000	#DIV/0!
Q8R1I1	Cytochrome b-c1 complex subunit 9	Uqcr10	24.92	0	10.9	37.5	37.5	0	0	139430000	119410000	0	129420000	#DIV/0!
A0A0J9YVG0;Q61074	Protein phosphatase 1G	Ppm1g	24.792	0	0	6.7	5.5	0	0	0	27400000	0	13700000	#DIV/0!
Q9CZC8;A0A0N4SWD0	Secernin-1	Scrn1	24.598	0	0	8	3.1	0	0	24379000	0	0	12189500	#DIV/0!
Q9CZ30;B1AYJ9	Obg-like ATPase 1	Ola1	24.573	3.5	6.3	6.8	6.1	0	0	0	27881000	0	13940500	#DIV/0!
P62715;P97470	Serine/threonine-protein phosphatase 2A catalytic subunit beta isoform	Ppp2cb	24.478	23.6	23.6	52.8	51.5	0	0	0	76700000	0	38350000	#DIV/0!
Q8CBB7;P22892	AP-1 complex subunit gamma-1	Ap1g1	24.401	1.1	1.3	1.6	4.1	0	0	0	41862000	0	20931000	#DIV/0!
P46061;A0A2R8VHK9;A0A2R8W753	Ran GTPase-activating protein 1	Rangap1	24.343	3.9	2	4.1	6.1	0	0	27721000	29874000	0	28797500	#DIV/0!
O35344;A0A0B4J1E7;O35343	Importin subunit alpha-4;Importin subunit alpha-3	Kpna3;Kpna4	24.172	0	0	1.9	7.3	0	0	0	74353000	0	37176500	#DIV/0!
A0A087WSI9;Q3TWS4;E9Q9A3;E9QQ05;A0A5F8MPL3;E9QLK9;Q61548;A0A140LHG9;Q7M6Y3	Clathrin coat assembly protein AP180	Snap91	24.076	0	12.8	10	12.3	0	0	0	42998000	0	21499000	#DIV/0!
Q9EPL8	Importin-7	Ipo7	23.597	1.2	1.3	2.6	0	0	0	13658000	0	0	6829000	#DIV/0!
P99026	Proteasome subunit beta type-4	Psmb4	23.511	0	3.8	14	6.8	0	0	0	55357000	0	27678500	#DIV/0!
Q9CXW3;A0A0A6YY29	Calcyclin-binding protein	Cacybp	23.211	0	3.9	10	14	0	0	0	30493000	0	15246500	#DIV/0!
P61222	ATP-binding cassette sub-family E member 1	Abce1	23.056	3.2	1.5	1.7	3.3	0	0	0	17537000	0	8768500	#DIV/0!
Q62465	Synaptic vesicle membrane protein VAT-1 homolog	Vat1	22.8	0	0	3.4	12.1	0	0	0	77808000	0	38904000	#DIV/0!
Q8R0Y6;A0A0N4SW56	Cytosolic 10-formyltetrahydrofolate dehydrogenase	Aldh1l1	22.748	1.3	1.3	0	4.7	0	0	0	40894000	0	20447000	#DIV/0!
Q921W2;D3Z3Y4;P70318;D6RGU1;A0A0U1RPD3	Nucleolysin TIAR	Tial1	22.356	2.4	0	22.4	22.4	0	0	71948000	75844000	0	73896000	#DIV/0!
Q3TF41;Q8BSH9;P28656	Nucleosome assembly protein 1-like 1	Nap1l1	22.123	2.7	2.7	15.8	7.6	0	0	128300000	0	0	64150000	#DIV/0!
Q60930;G3UX26;D3YUN8;D3YZT5;A0A286YCR8	Voltage-dependent anion-selective channel protein 2	Vdac2	21.906	0	3.4	3.4	10.2	0	0	0	112930000	0	56465000	#DIV/0!
Q9R1P3	Proteasome subunit beta type-2	Psmb2	21.376	0	0	10.4	10.4	0	0	74079000	78134000	0	76106500	#DIV/0!
Q9CPW4;Q3UA72	Actin-related protein 2/3 complex subunit 5	Arpc5	21.063	7.9	8.6	20.5	20.5	0	0	65484000	0	0	32742000	#DIV/0!
P00405	Cytochrome c oxidase subunit 2	Mtco2	20.75	4.4	4.4	13.2	13.2	0	0	202770000	244530000	0	223650000	#DIV/0!
Q5U3K5	Rab-like protein 6	Rabl6	20.669	0	0	4.4	4.1	0	0	44772000	0	0	22386000	#DIV/0!
A0A1W2P7H9;A0A1W2P7T3;P84089	Enhancer of rudimentary homolog	Erh	20.276	15.5	15.5	0	15.5	0	0	0	63384000	0	31692000	#DIV/0!
Q9D7A8	Armadillo repeat-containing protein 1	Armc1	20.203	0	0	20.2	8.9	0	0	81007000	64725000	0	72866000	#DIV/0!
P98086	Complement C1q subcomponent subunit A	C1qa	20.13	0	0	6.1	13.5	0	0	0	40268000	0	20134000	#DIV/0!
A0A0A6YWP6;A0A0A6YX18;Q8BVE3;A0A0A6YVU0	V-type proton ATPase subunit H	Atp6v1h	20.096	6.3	2.9	5.2	5.2	0	0	0	24641000	0	12320500	#DIV/0!
Q9D8S5;O35326;Q3TWW8	Serine/arginine-rich splicing factor 5	Srsf5	19.96	3.3	3.3	10.7	14.1	0	0	50833000	72495000	0	61664000	#DIV/0!
Q3UUQ7	GPI inositol-deacylase	Pgap1	19.948	1.2	0.9	1.2	1.2	0	0	0	9853000	0	4926500	#DIV/0!
A0A1D5RL92;G5E8I8;Q8CGZ0	Calcium homeostasis endoplasmic reticulum protein	Cherp	19.516	0	0	3.3	4.1	0	0	0	51468000	0	25734000	#DIV/0!
E0CXZ1;J3QM95;F8WGT4;Q8BYN5	FSD1-like protein	Fsd1l	19.341	2.8	3	3.2	3.2	0	0	0	7735400	0	3867700	#DIV/0!
P32233	Developmentally-regulated GTP-binding protein 1	Drg1	19.29	2.5	0	3.8	3.3	0	0	25071000	0	0	12535500	#DIV/0!
P97376	Protein FRG1	Frg1	19.28	0	0	4.3	16.3	0	0	0	101630000	0	50815000	#DIV/0!
D3Z7C6;Q9R0Q7	Prostaglandin E synthase 3	Ptges3	19.278	0	0	23.1	28.5	0	0	471550000	423480000	0	447515000	#DIV/0!
S4R1E5;O70325	Glutathione peroxidase;Phospholipid hydroperoxide glutathione peroxidase, mitochondrial	Gpx4	19.208	8.9	16.6	15.9	0	0	0	45842000	0	0	22921000	#DIV/0!
D6RDC7;Q9ERF3;D6RJ72;Q8BVQ0	WD repeat-containing protein 61;WD repeat-containing protein 61, N-terminally processed	Wdr61	19.071	0	0	19.8	0	0	0	63554000	0	0	31777000	#DIV/0!
Q9DCJ5	NADH dehydrogenase [ubiquinone] 1 alpha subcomplex subunit 8	Ndufa8	19.031	0	7	10.5	18	0	0	0	25686000	0	12843000	#DIV/0!
A3KGL9;B7ZCQ3;F6W687;P09602;Q5XK38	Non-histone chromosomal protein HMG-17	Hmgn2	18.998	13.5	13.5	15.6	15.6	0	0	426590000	416900000	0	421745000	#DIV/0!
Q61136	Serine/threonine-protein kinase PRP4 homolog	Prpf4b	18.827	0	0	1.4	2.1	0	0	0	413070000	0	206535000	#DIV/0!
P97807	Fumarate hydratase, mitochondrial	Fh	18.747	1.6	3.6	6.1	6.1	0	0	23769000	19772000	0	21770500	#DIV/0!
Q00612;A3KG36;G3UWD6;P97324	Glucose-6-phosphate 1-dehydrogenase X;Glucose-6-phosphate 1-dehydrogenase;Glucose-6-phosphate 1-dehydrogenase 2	G6pdx;G6pd2	18.557	1.9	4.1	2.9	5	0	0	0	12644000	0	6322000	#DIV/0!
A0A5F8MPB9;P26043;Q7TSG6;P26041	Radixin;Moesin	Rdx;Msn	18.455	1.7	7.8	6.3	3.8	0	0	26527000	0	0	13263500	#DIV/0!
P09103;E9Q8G8	Protein disulfide-isomerase	P4hb	18.269	0	0	3.5	4.1	0	0	47225000	0	0	23612500	#DIV/0!
Q9CPQ1;A0A0G2JDA6	Cytochrome c oxidase subunit 6C	Cox6c	18.221	15.8	0	26.3	0	0	0	98541000	0	0	49270500	#DIV/0!
P26645	Myristoylated alanine-rich C-kinase substrate	Marcks	17.794	6.1	4.9	6.1	6.1	0	0	0	48669000	0	24334500	#DIV/0!
P28663	Beta-soluble NSF attachment protein	Napb	17.401	0	4	3.7	3.7	0	0	0	16229000	0	8114500	#DIV/0!
Q9D898	Actin-related protein 2/3 complex subunit 5-like protein	Arpc5l	17.189	0	0	7.8	7.8	0	0	0	7718600	0	3859300	#DIV/0!
Z4YJT3;Q6ZQ58	La-related protein 1	Larp1	17.027	0	1.1	2.1	1.2	0	0	71854000	0	0	35927000	#DIV/0!
Q6P5F9;A2AKT6	Exportin-1	Xpo1	16.998	0.9	0.7	0	1.1	0	0	0	10055000	0	5027500	#DIV/0!
A0A087WNM1;Q91Z67;A0A087WS59;A0A087WSQ1;A0A087WRV4	SLIT-ROBO Rho GTPase-activating protein 2	Srgap2	16.661	0	3.1	1.2	0	0	0	15973000	0	0	7986500	#DIV/0!
Q9Z1Z2	Serine-threonine kinase receptor-associated protein	Strap	16.049	0	0	4.6	9.7	0	0	0	48885000	0	24442500	#DIV/0!
Q9WTL7	Acyl-protein thioesterase 2	Lypla2	15.096	0	0	0	11.3	0	0	0	20911000	0	10455500	#DIV/0!
Q6R891	Neurabin-2	Ppp1r9b	15.038	0	0	3.8	3.8	0	0	0	13046000	0	6523000	#DIV/0!
E9QKA4;A2A8V8;A2A8V9;E9PUK6;Q52KI8;F6T4M4;A2A983	Serine/arginine repetitive matrix protein 1	Srrm1	14.981	0	1.1	1.3	2.5	0	0	0	20974000	0	10487000	#DIV/0!
A0A3Q4EBK4;Q6P1B9;O08539	Myc box-dependent-interacting protein 1	Bin1	14.976	0	0	9	9	0	0	38691000	35408000	0	37049500	#DIV/0!
Q9R1P0;E9PW69	Proteasome subunit alpha type-4;Proteasome subunit alpha type	Psma4	14.902	0	0	9.2	9.2	0	0	0	49634000	0	24817000	#DIV/0!
Q9EST5	Acidic leucine-rich nuclear phosphoprotein 32 family member B	Anp32b	14.887	14.3	2.9	11.4	14.3	0	0	120210000	160320000	0	140265000	#DIV/0!
P14106	Complement C1q subcomponent subunit B	C1qb	14.827	0	0	9.9	4.7	0	0	77415000	0	0	38707500	#DIV/0!
D3Z5B1;B2RPU8;Q9D1L0	Coiled-coil-helix-coiled-coil-helix domain-containing protein 2	Zbed5;Chchd2	14.768	0	5.5	13.1	0	0	0	13925000	0	0	6962500	#DIV/0!
A0A1B0GRU3;E9Q8K8;Q6ZPZ3	Zinc finger CCCH domain-containing protein 4	Zc3h4	14.748	0	0	1.8	3.1	0	0	0	21877000	0	10938500	#DIV/0!
P28667	MARCKS-related protein	Marcksl1	14.483	6.5	6.5	14	14	0	0	49168000	56031000	0	52599500	#DIV/0!
B2RXS8;A0A0J9YVD2;B9EKR1	Protein-tyrosine-phosphatase;Receptor-type tyrosine-protein phosphatase zeta	Ptprz1	14.45	1	0	1.8	1.8	0	0	67653000	87394000	0	77523500	#DIV/0!
Q8BTX9;A0A1D5RM62;A0A1D5RLG0	Inactive hydroxysteroid dehydrogenase-like protein 1	Hsdl1	14.437	0	3.9	3.3	3.3	0	0	0	4160500	0	2080250	#DIV/0!
A0A140LHU1;E9Q3T7;E9Q242;P54822	Adenylosuccinate lyase	Adsl	14.203	0	8.3	22.6	22.6	0	0	19408000	18154000	0	18781000	#DIV/0!
Q99PL6	UBX domain-containing protein 6	Ubxn6	14.167	0	0	6.1	0	0	0	15867000	0	0	7933500	#DIV/0!
A2AMY5;Q91VX2	Ubiquitin-associated protein 2	Ubap2	14.11	0	0	1.9	1.9	0	0	24116000	23490000	0	23803000	#DIV/0!
F8WJK8;Q99L47;E9Q1V0	Hsc70-interacting protein	St13	13.95	0	0	2.8	7.5	0	0	0	11089000	0	5544500	#DIV/0!
F8WHY9;Q8BKV1;E0CXM8;M0QWK4	Glypican-2;Secreted glypican-2	Gpc2	13.77	1.8	0	3.2	0	0	0	14998000	0	0	7499000	#DIV/0!
H7BWZ3;Q9JM76;A0A0G2JFK7;D3Z2F7;D3Z2F8	Actin-related protein 2/3 complex subunit 3	Arpc3	13.715	0	6.5	14.1	14.1	0	0	32148000	28867000	0	30507500	#DIV/0!
Q9DCW5;P43024	Cytochrome c oxidase subunit 6A, mitochondrial;Cytochrome c oxidase subunit 6A1, mitochondrial	Cox6a1	13.633	0	0	16.1	16.1	0	0	0	82245000	0	41122500	#DIV/0!
A0A338P7F1;O09061;A0A338P7C0	Proteasome subunit beta type-1	Psmb1	13.576	0	0	14.3	9.4	0	0	45588000	0	0	22794000	#DIV/0!
Q9CQK7	RWD domain-containing protein 1	Rwdd1	13.243	0	0	6.6	10.3	0	0	0	22211000	0	11105500	#DIV/0!
Q8R1N0	Zinc finger protein 830	Znf830	13.225	0	0	7.7	3.3	0	0	52530000	0	0	26265000	#DIV/0!
P63213	Guanine nucleotide-binding protein G(I)/G(S)/G(O) subunit gamma-2	Gng2	13.195	0	0	42.3	22.5	0	0	78986000	0	0	39493000	#DIV/0!
E9PUX0;Q80WJ7;F6ZQL0;F6QFT1;F6QHD1	Protein LYRIC	Mtdh	13.194	0	0	6.7	9.8	0	0	0	24890000	0	12445000	#DIV/0!
Q9JMG1	Endothelial differentiation-related factor 1	Edf1	13.085	10.1	10.1	15.5	15.5	0	0	68639000	68222000	0	68430500	#DIV/0!
Q9Z2I0	LETM1 and EF-hand domain-containing protein 1, mitochondrial	Letm1	13.079	0	0	0	5.1	0	0	0	37256000	0	18628000	#DIV/0!
Q9JHU9	Inositol-3-phosphate synthase 1	Isyna1	12.982	0	0	5.2	2.3	0	0	0	8821700	0	4410850	#DIV/0!
P06837	Neuromodulin	Gap43	12.943	6.2	11.9	11.9	11.9	0	0	0	69927000	0	34963500	#DIV/0!
Q9QZE5;Q9QXK3	Coatomer subunit gamma-1;Coatomer subunit gamma-2	Copg1;Copg2	12.86	1	1	1.4	0	0	0	8455800	0	0	4227900	#DIV/0!
Q8C1S0	Mediator of RNA polymerase II transcription subunit 19	Med19	12.784	0	0	4.5	9.4	0	0	0	86880000	0	43440000	#DIV/0!
Q8BIW1	Protein prune homolog	Prune	12.774	0	0	0	3.3	0	0	0	4520500	0	2260250	#DIV/0!
A2AKA9;Q3UH70;Q8K2F0;Q9ESU6;B0V2V6;A0A494BAK1;Q91Y44	Bromodomain-containing protein 3;Bromodomain-containing protein 4;Bromodomain testis-specific protein	Brd3;Brd4;Brdt	12.768	1.2	1.2	3.1	3.1	0	0	30939000	26075000	0	28507000	#DIV/0!
Q6PGH1	Protein BUD31 homolog	Bud31	12.595	0	0	13.9	6.9	0	0	16815000	0	0	8407500	#DIV/0!
Q80UM7	Mannosyl-oligosaccharide glucosidase	Mogs	12.561	0	0	2.2	4.3	0	0	0	27027000	0	13513500	#DIV/0!
O88544;D3Z1R9;D3YV99;F6QTS1	COP9 signalosome complex subunit 4	Cops4	12.458	0	0	6.4	0	0	0	19713000	0	0	9856500	#DIV/0!
Q9D735	Uncharacterized protein C19orf43 homolog		12.435	6.9	0	8.7	0	0	0	9306800	0	0	4653400	#DIV/0!
Q9CWU3;Q6P1F6;F6RV17;Q925E7	Serine/threonine-protein phosphatase 2A 55 kDa regulatory subunit B;Serine/threonine-protein phosphatase 2A 55 kDa regulatory subunit B alpha isoform;Serine/threonine-protein phosphatase 2A 55 kDa regulatory subunit B delta isoform	Ppp2r2a;Ppp2r2d	12.418	0	3	0	3.3	0	0	0	25128000	0	12564000	#DIV/0!
A0A0N4SVQ1;Q62425	Cytochrome c oxidase subunit NDUFA4	Ndufa4	12.405	0	24.5	44.9	44.9	0	0	119660000	0	0	59830000	#DIV/0!
E9QNP0;P62984	Ubiquitin-60S ribosomal protein L40;Ubiquitin;60S ribosomal protein L40	Kxd1;Uba52	12.255	6.9	0	4.3	4.3	0	0	0	7804800	0	3902400	#DIV/0!
P61202;A2AQE4	COP9 signalosome complex subunit 2	Cops2	12.252	0	0	2.9	3.2	0	0	0	8989500	0	4494750	#DIV/0!
A0A1B0GRS0;A0A1B0GRM9;A0A1B0GT95;B1AS34;A0A338P6Q9;Q3U4B1;B1AS37;Q9CYZ8;Q9D032;D6RG78	Single-stranded DNA-binding protein 2;Single-stranded DNA-binding protein 3	Ssbp3;Ssbp4;Ssbp2	12.221	11.2	11.2	11.2	18	0	0	0	9044200	0	4522100	#DIV/0!
A2AML9;A0A0A0MQL0;Q6PFE7	Tomoregulin-1	Tmeff1	12.218	0	0	7.9	15.9	0	0	0	7431100	0	3715550	#DIV/0!
Q9D6J6;D6RGN4;M0QWP9	NADH dehydrogenase [ubiquinone] flavoprotein 2, mitochondrial	Ndufv2	12.198	4.4	0	4	4	0	0	0	2970300	0	1485150	#DIV/0!
P05480;D3YZ57;P39688;Q04736	Neuronal proto-oncogene tyrosine-protein kinase Src;Non-specific protein-tyrosine kinase;Tyrosine-protein kinase Fyn;Tyrosine-protein kinase Yes	Src;Fyn;Yes1	12.154	0	2.1	0	3.2	0	0	0	9577900	0	4788950	#DIV/0!
Q8C460;A0A0R4J1R9	ERI1 exoribonuclease 3	Eri3	12.134	0	3.3	0	3.6	0	0	0	11780000	0	5890000	#DIV/0!
A0A2R8VHT1;Q99J99;A0A2R8VHE5	3-mercaptopyruvate sulfurtransferase	Mpst	11.995	0	7.1	7.7	7.7	0	0	0	28290000	0	14145000	#DIV/0!
A0A0B4J1G1;E9Q415;A0A0B4J1E6;P08508;P08101;E9PUV2;A0A0B4J1M6	Low affinity immunoglobulin gamma Fc region receptor III;Low affinity immunoglobulin gamma Fc region receptor II	Fcgr2b;Fcgr3;Fcgr2	11.954	0	0	6.1	3.4	0	0	24525000	0	0	12262500	#DIV/0!
A2AFW6;Q9D050;Q791V5	Mitochondrial carrier homolog 2	Mtch2	11.921	0	0	12.6	0	0	0	19332000	0	0	9666000	#DIV/0!
A0A2I3BQB9;E9Q6A0;Q19AB2;A0A2I3BR72;Q7TPD3;A0A338P6U2;G5E843;A0A338P6F7;O89026	Roundabout homolog 2;Roundabout homolog 1	Robo2;Robo1	11.909	0	0	3.2	1.1	0	0	0	5023600	0	2511800	#DIV/0!
A1BN54;Q7TPR4	Alpha-actinin-1	Actn1	11.808	0	0	3.7	8.6	0	0	0	13761000	0	6880500	#DIV/0!
A0A140LIS5;Q3UL36	Arginine and glutamate-rich protein 1	Arglu1	11.805	0	0	7.4	7.4	0	0	18327000	0	0	9163500	#DIV/0!
Q9D051	Pyruvate dehydrogenase E1 component subunit beta, mitochondrial	Pdhb	11.764	0	0	5.3	5.3	0	0	95064000	128310000	0	111687000	#DIV/0!
Q9CQD4;Q99LU0	Charged multivesicular body protein 1b-2;Charged multivesicular body protein 1b-1	Chmp1b2;Chmp1b1	11.726	0	0	4	8.5	0	0	0	14518000	0	7259000	#DIV/0!
V9GXE7;P58404;B2RQS1;Q9ERG2	Striatin-4;Striatin-3	Strn4;Strn3	11.608	0	0	5.6	10.6	0	0	0	12839000	0	6419500	#DIV/0!
Q9JKR6	Hypoxia up-regulated protein 1	Hyou1	11.493	0	0	0	2.3	0	0	0	22212000	0	11106000	#DIV/0!
S4R1J9;S4R2T7;S4R2F3;A0A1D5RLB2;S4R2R5;Q8C8R3	Ankyrin-2	Ank2	11.211	0	1.3	1.4	0	0	0	16335000	0	0	8167500	#DIV/0!
A0A498WGD8;Q8CDN6;A0A494BB31;A0A494BBI1;A0A494B955	Thioredoxin-like protein 1	Txnl1	11.06	0	0	9.9	0	0	0	73655000	0	0	36827500	#DIV/0!
A0A0U1RPH5;A0A0U1RNL1;F8VPK3;A0A0U1RNL9;P56671	Myc-associated zinc finger protein	Maz	11.041	0	0	7	8.7	0	0	0	8248300	0	4124150	#DIV/0!
P28271;Q811J3	Cytoplasmic aconitate hydratase;Iron-responsive element-binding protein 2	Aco1;Ireb2	10.986	0.9	0.9	0.9	0	0	0	4799400	0	0	2399700	#DIV/0!
P61027	Ras-related protein Rab-10	Rab10	10.96	5.5	5.5	11	11	0	0	0	43405000	0	21702500	#DIV/0!
D3Z3X4;Q9CQB5	CDGSH iron-sulfur domain-containing protein 2	Cisd2	10.894	0	0	12	13	0	0	0	20775000	0	10387500	#DIV/0!
P11260	LINE-1 retrotransposable element ORF1 protein		10.882	0	3.4	4.5	0	0	0	18346000	0	0	9173000	#DIV/0!
A0A668KLV1;E0CY16;E9PYN1;Q8R5M8	Cell adhesion molecule 1	Cadm1	10.755	0	0	7.5	3.6	0	0	0	10764000	0	5382000	#DIV/0!
D3YWC2;D3Z6F1;Q9JM93	ADP-ribosylation factor-like protein 6-interacting protein 4	Arl6ip4	10.067	0	0	10	10	0	0	0	9973400	0	4986700	#DIV/0!
P62983;A0A0A6YW67;E9Q9J0;E9Q4P0;E9Q5F6;Q5SX22;P0CG49;P0CG50	Ubiquitin-40S ribosomal protein S27a;Ubiquitin;40S ribosomal protein S27a;Polyubiquitin-B;Ubiquitin;Polyubiquitin-C;Ubiquitin;Ubiquitin-related 1;Ubiquitin-related 2	Rps27a;Gm8797;Uba52;Kxd1;Ubc;Ubb	8.6223	22.4	0	12.2	12.2	0	0	0	126400000	0	63200000	#DIV/0!
P60710;E9Q1F2;E9Q5F4;G3UZ07;F8WGM8;E9Q2D1;Q8BFZ3;F6WX90;V9GXQ2;A0A0U1RQ96	Actin, cytoplasmic 1;Actin, cytoplasmic 1, N-terminally processed	Actb;Actg1	8.5407	50.9	43.2	59.5	67.5	0	0	0	61795000	0	30897500	#DIV/0!
Q9ESP1	Stromal cell-derived factor 2-like protein 1	Sdf2l1	8.3767	0	0	0	10	0	0	0	29254000	0	14627000	#DIV/0!
Q9QZF2	Glypican-1;Secreted glypican-1	Gpc1	8.3584	0	0	3.2	3.2	0	0	0	16027000	0	8013500	#DIV/0!
O08529	Calpain-2 catalytic subunit	Capn2	8.2646	0	0	2.6	2.6	0	0	0	23763000	0	11881500	#DIV/0!
P19783	Cytochrome c oxidase subunit 4 isoform 1, mitochondrial	Cox4i1	8.1155	0	0	10.7	10.7	0	0	0	22216000	0	11108000	#DIV/0!
D3YX85;E9PX52;Q7SIG6	Arf-GAP with SH3 domain, ANK repeat and PH domain-containing protein 2	Asap2	7.9241	0.8	0.8	0.8	0.8	0	0	0	225860000	0	112930000	#DIV/0!
A0A286YD22;A0A286YDT9;A0A286YDG2;Q9JMB0	G kinase-anchoring protein 1	Gkap1	7.8521	0	0	20.9	20.9	0	0	0	6308200	0	3154100	#DIV/0!
Q8VCR4;Q9DCG9	Multifunctional methyltransferase subunit TRM112-like protein	Trmt112	7.7531	0	0	11.1	11.1	0	0	44449000	0	0	22224500	#DIV/0!
A0A087WQQ9;Q61330	Contactin-2	Cntn2	7.6299	0	0	3.1	3.1	0	0	0	7033000	0	3516500	#DIV/0!
A0A338P6W1;P97868	E3 ubiquitin-protein ligase RBBP6	Rbbp6	7.6218	0	0	0.8	0.8	0	0	0	5903100	0	2951550	#DIV/0!
Q3UX10	Tubulin alpha chain-like 3	Tubal3	7.6193	8.3	8.3	8.3	8.3	0	0	0	15702000	0	7851000	#DIV/0!
Q8BH80;Q9QY76	Vesicle-associated membrane protein-associated protein B	Vapb	7.5009	0	0	5.8	10.7	0	0	11784000	0	0	5892000	#DIV/0!
Q9CQV6;M0QWC2	Microtubule-associated proteins 1A/1B light chain 3B	Map1lc3b	7.4848	11.2	11.2	11.2	16.8	0	0	0	84223000	0	42111500	#DIV/0!
O55022	Membrane-associated progesterone receptor component 1	Pgrmc1	7.4096	0	0	7.2	7.2	0	0	0	40008000	0	20004000	#DIV/0!
Q922F4;A2AQ07	Tubulin beta-6 chain	Tubb6	7.3213	26	23.9	36.2	32.9	0	0	0	25817000	0	12908500	#DIV/0!
F7DE82;Q9D8T7	SRA stem-loop-interacting RNA-binding protein, mitochondrial	Slirp	7.2242	0	0	12.7	12.7	0	0	0	25344000	0	12672000	#DIV/0!
A2BH29;H3BLM2;Q9Z1F9	SUMO-activating enzyme subunit 2	Uba2	7.2204	0	10.1	10.1	10.1	0	0	0	6196200	0	3098100	#DIV/0!
Q921M7;A0A2I3BQK1;A0A2I3BPH9;A0A2I3BRN5	Protein FAM49B	Fam49b	7.2192	2.8	2.8	4	4	0	0	8837900	0	0	4418950	#DIV/0!
Q9D0T1	NHP2-like protein 1;NHP2-like protein 1, N-terminally processed	Nhp2l1	7.194	0	0	9.4	0	0	0	41110000	0	0	20555000	#DIV/0!
A0A2I3BQ39;Q9JKB1;P58321	Ubiquitin carboxyl-terminal hydrolase isozyme L3;Ubiquitin carboxyl-terminal hydrolase isozyme L4	Uchl3;Uchl4	7.1443	0	0	0	5.3	0	0	0	4340100	0	2170050	#DIV/0!
Q91YL2	E3 ubiquitin-protein ligase RNF126	Rnf126	7.1285	0	0	4.5	4.5	0	0	0	16924000	0	8462000	#DIV/0!
A2AUM6;P16254	Signal recognition particle 14 kDa protein;Signal recognition particle 14 kDa protein, N-terminally processed	Srp14	7.0787	0	0	14.4	14.4	0	0	0	29962000	0	14981000	#DIV/0!
E9PV95	Olfactory receptor	Olfr619	7.0568	0	0	3.8	3.8	0	0	0	41628000	0	20814000	#DIV/0!
D3YV76;F6UKN5;D3YZU7;D3Z1S1;F6WYM0;D3YYB1;D3Z3C0;E9Q3V6;P42208	Septin-2	Sept2	7.0534	0	0	20.8	0	0	0	10103000	0	0	5051500	#DIV/0!
G3UXY0;G3X9K9;G3UXZ5;P97371	Proteasome activator complex subunit 1	Psme1	6.9931	0	0	5.3	5.3	0	0	0	6470300	0	3235150	#DIV/0!
Q3U4F0;Q91V61;Q99JR1	Sideroflexin-3;Sideroflexin-1	Sfxn3;Sfxn1	6.9516	0	0	6.8	6.8	0	0	0	8360900	0	4180450	#DIV/0!
A0A0B4J1E2;Q9CSN1	SNW domain-containing protein 1	Snw1	6.9378	0	2.8	0	2.8	0	0	0	23371000	0	11685500	#DIV/0!
Q3UNN4;Q3UID0;P97496;Q6PDG5	SWI/SNF complex subunit SMARCC1;SWI/SNF complex subunit SMARCC2	Smarcc1;Smarcc2	6.936	0	1	0	1	0	0	0	12633000	0	6316500	#DIV/0!
Q9ESW4	Acylglycerol kinase, mitochondrial	Agk	6.9049	0	0	5.9	5.9	0	0	0	21001000	0	10500500	#DIV/0!
D3Z0U5;D6RGM7;D3Z4J2;A0A0G2JFY0;A0A0A0MQ80;Q9D3R6;Q3UMC0	Katanin p60 ATPase-containing subunit A-like 2;Spermatogenesis-associated protein 5	Katnal2;Spata5	6.9041	0	0	4.3	4.3	0	0	0	16541000	0	8270500	#DIV/0!
A0A494BAW8;Q8K3J1	NADH dehydrogenase [ubiquinone] iron-sulfur protein 8, mitochondrial	Ndufs8	6.9006	0	0	0	16.4	0	0	0	6007200	0	3003600	#DIV/0!
G3X956;Q920B9	FACT complex subunit SPT16	Supt16;Supt16h	6.8916	0	0	0	1.1	0	0	0	0	0	0	#DIV/0!
Q8K3H0	DCC-interacting protein 13-alpha	Appl1	6.8681	0	0	2.3	2.3	0	0	0	15017000	0	7508500	#DIV/0!
A0A0R4J107;Q8R146	Acylamino-acid-releasing enzyme	Apeh	6.8402	0	0	2.1	2.1	0	0	0	26317000	0	13158500	#DIV/0!
D3Z4X1;Q9CQ60	6-phosphogluconolactonase	Pgls	6.8287	0	0	8	8	0	0	0	6769300	0	3384650	#DIV/0!
Q9CYL5	Golgi-associated plant pathogenesis-related protein 1	Glipr2	6.8158	0	0	8.4	0	0	0	11522000	0	0	5761000	#DIV/0!
Q99LX5	Multiple myeloma tumor-associated protein 2 homolog	Mmtag2	6.8054	0	0	5.4	5.4	0	0	0	13517000	0	6758500	#DIV/0!
A0A075B5V7;A0A075B5V6;A0A075B5V1;A0A075B5U6;A0A0A6YY38;A0A0A6YXN5;A0A0A6YX66;A0A0A6YWK5;A0A075B5V2;A0A075B5V0;A0A075B5U7;P06330	Ig heavy chain V region AC38 205.12	Ighv1-43;Ighv1-42;Ighv1-31;Ighv1-20;Ighv1-34;Ighv1-26;Ighv1-22	6.7989	0	0	14.3	14.3	0	0	0	265490000	0	132745000	#DIV/0!
A0A2I3BS20;A0A2I3BQM5;A0A2I3BPL1;A0A2I3BQR5;A0A2I3BPW0;Q9QYG0	Protein NDRG2	Ndrg2	6.7775	0	0	11.4	11.4	0	0	0	6731200	0	3365600	#DIV/0!
Q9D0R2	Threonine--tRNA ligase, cytoplasmic	Tars	6.7666	0	1.9	1.9	1.9	0	0	0	11864000	0	5932000	#DIV/0!
G3UXA3;G3UWV3;G3V004;Q6XLQ8;O35887	Calumenin	Calu	6.7658	0	0	17.6	17.6	0	0	0	10675000	0	5337500	#DIV/0!
D3Z1T8;D3Z767;Q9D6K7	Tetratricopeptide repeat protein 33	Ttc33	6.7613	0	0	13.8	13.8	0	0	0	30524000	0	15262000	#DIV/0!
A0A1L1SRD6;Q7TQG5;E9QK04;P97798	Neogenin	Neo1	6.7538	0	0	3.2	0	0	0	12938000	0	0	6469000	#DIV/0!
P35235	Tyrosine-protein phosphatase non-receptor type 11	Ptpn11	6.7042	0	0	0	3.2	0	0	0	6315400	0	3157700	#DIV/0!
Q9D115	Zinc finger protein 706	Znf706	6.6873	14.5	14.5	14.5	14.5	0	0	0	48190000	0	24095000	#DIV/0!
P01649;P01648;P01647;P01646;P01645;P01644;P01643;P01670	Ig kappa chain V-V regions;Ig kappa chain V-V region HP 91A3;Ig kappa chain V-V region HP 124E1;Ig kappa chain V-V region HP 123E6;Ig kappa chain V-V region HP 93G7;Ig kappa chain V-V region HP R16.7;Ig kappa chain V-V region MOPC 173;Ig kappa chain V-III region PC 6684		6.6865	0	0	10.2	10.2	0	0	0	58346000	0	29173000	#DIV/0!
D3Z4V1;Q922V4	Pleiotropic regulator 1	Plrg1	6.6583	0	0	0	4	0	0	0	16781000	0	8390500	#DIV/0!
F6WR04;O70370	Cathepsin S	Ctss	6.6565	0	0	3.5	3.5	0	0	0	18688000	0	9344000	#DIV/0!
D3YYT0;P15116	Cadherin-2	Cdh2	6.6482	0	0	3.1	3.1	0	0	0	13069000	0	6534500	#DIV/0!
E9PYU8;Q9CUN6	E3 ubiquitin-protein ligase SMURF1	Smurf1	6.6479	0	0	1.6	1.6	0	0	0	11433000	0	5716500	#DIV/0!
A0A087WNL9;Q0VG62	Uncharacterized protein C8orf59 homolog	1810022K09Rik	6.6424	0	0	24.1	0	0	0	4932300	0	0	2466150	#DIV/0!
D3Z7P7;D3Z326;F6VJ22;D3Z6A5;F6QWT6;F6U9F5;F6Q346;Q62347;F6W4F5;E9PWV9;D3Z7M6;F6QKL8;D3Z2U7;P81269;Q01147	Cyclic AMP-dependent transcription factor ATF-1;Cyclic AMP-responsive element-binding protein 1	Crem;Creb1;Atf1	6.6402	0	0	9.5	9.5	0	0	2822200	0	0	1411100	#DIV/0!
Q8C167	Prolyl endopeptidase-like	Prepl	6.6206	0	0	2.3	0	0	0	4061700	0	0	2030850	#DIV/0!
F7AL76;Q09XV5	Chromodomain-helicase-DNA-binding protein 8	Chd8	6.6034	0	0	0	1	0	0	0	0	0	0	#DIV/0!
A2AG41;Q99JB2	Stomatin-like protein 2, mitochondrial	Stoml2	6.542	0	0	7.1	7.1	0	0	0	4947600	0	2473800	#DIV/0!
P70195	Proteasome subunit beta type-7	Psmb7	6.5328	0	0	0	5.1	0	0	0	20105000	0	10052500	#DIV/0!
E9Q4Q8;E9Q8R1;Q6P0X1;E9Q6U4;Q3UWL8	Prefoldin subunit 4	Pfdn4	6.5313	0	25.5	25.5	0	0	0	6843500	0	0	3421750	#DIV/0!
F8VPX1;E9PXY8;Q6A4J8	Ubiquitin carboxyl-terminal hydrolase;Ubiquitin carboxyl-terminal hydrolase 7	Usp7	6.5247	0	0	1.1	1.1	0	0	0	6182400	0	3091200	#DIV/0!
Q91YD9	Neural Wiskott-Aldrich syndrome protein	Wasl	6.5202	0	0	2.2	2.2	0	0	42760000	0	0	21380000	#DIV/0!
Q78IK2	Up-regulated during skeletal muscle growth protein 5	Usmg5	6.5197	0	25.9	0	25.9	0	0	0	21673000	0	10836500	#DIV/0!
A2A4J1;P61290	Proteasome activator complex subunit 3	Psme3	6.5049	0	0	7.4	0	0	0	6887800	0	0	3443900	#DIV/0!
Q9EQQ9	Protein O-GlcNAcase	Mgea5	6.494	0	0	1.4	1.4	0	0	0	11242000	0	5621000	#DIV/0!
A0A1Y7VIZ0;Q9CZE3	Ras-related protein Rab-32	Rab32	6.4714	0	0	11	11	0	0	0	187560000	0	93780000	#DIV/0!
A0A286YCG0;A0A0R4J030;Q8CCJ4	APC membrane recruitment protein 2	Amer2	6.462	0	0	5.9	5.9	0	0	0	16662000	0	8331000	#DIV/0!
Q9DB05	Alpha-soluble NSF attachment protein	Napa	6.4469	0	0	8.8	8.8	0	0	0	10934000	0	5467000	#DIV/0!
A0A494B9N4;A0A494B991;A0A286YCR9;A0A2C9F2C1;A0A494BB44;A0A498WGM0;Q9R0N7	Synaptotagmin-7	Syt7	6.4179	0	0	0	2.3	0	0	0	10519000	0	5259500	#DIV/0!
E9QLB2;Q3UFF7	Lysophospholipase-like protein 1	Lyplal1	6.4177	0	0	6.3	0	0	0	2650200000	0	0	1325100000	#DIV/0!
P61028	Ras-related protein Rab-8B	Rab8b	6.4007	5.3	5.3	12.1	12.1	0	0	0	7051600	0	3525800	#DIV/0!
P51859;E0CYW7;E0CXA0	Hepatoma-derived growth factor	Hdgf	6.3863	7.2	7.2	10.5	7.2	0	0	0	27798000	0	13899000	#DIV/0!
A0A0G2JDV5;Q8C3Y4	Kinetochore-associated protein 1	Kntc1	6.3719	0	0	11.8	11.8	0	0	0	123230000	0	61615000	#DIV/0!
Q91W69	Epsin-3	Epn3	6.3591	0	0	1.6	1.6	0	0	0	2438600	0	1219300	#DIV/0!
Q8C0E2	Vacuolar protein sorting-associated protein 26B	Vps26b	6.3336	0	0	3.6	0	0	0	9910500	0	0	4955250	#DIV/0!
A0A0G2JGQ0;P48036	Annexin A5	Anxa5	6.3237	0	0	0	11.7	0	0	0	8254600	0	4127300	#DIV/0!
A0A0N4SVM8;Q3TZK9;A0A0N4SV38;A0A0N4SVI8;E9QKZ7;A0A0N4SV80;E9QML5;Q61464	Zinc finger protein 638	Zfml;Znf638	6.3123	0	0	1.6	1.6	0	0	0	30138000	0	15069000	#DIV/0!
Q8BP92	Reticulocalbin-2	Rcn2	6.3032	0	0	0	4.7	0	0	0	15148000	0	7574000	#DIV/0!
P97427;A0A0J9YTX5;A0A0J9YUZ1	Dihydropyrimidinase-related protein 1	Crmp1	6.299	23.3	23.1	49.5	42.7	0	0	81236000	92056000	0	86646000	#DIV/0!
Q9D892	Inosine triphosphate pyrophosphatase	Itpa	6.2779	0	0	10.6	10.6	0	0	0	12772000	0	6386000	#DIV/0!
A2ARQ2;D6RCY2;D6RIP7;A2ARQ4;P84102	Small EDRK-rich factor 2	Serf2	6.2692	0	0	26.2	26.2	0	0	0	21919000	0	10959500	#DIV/0!
O54984	ATPase Asna1	Asna1	6.2597	0	0	4.6	4.6	0	0	0	25376000	0	12688000	#DIV/0!
Q5NC80;P15532;Q5NC79	Nucleoside diphosphate kinase;Nucleoside diphosphate kinase A	Nme1	6.2439	51.2	36.2	7.9	0	0	0	10566000	0	0	5283000	#DIV/0!
Q8BWT1	3-ketoacyl-CoA thiolase, mitochondrial	Acaa2	6.2099	3.5	3.5	3.5	3.5	0	0	0	44421000	0	22210500	#DIV/0!
H3BJ75;Q9QZB9	Dynactin subunit 5	Dctn5	6.207	0	0	18.5	18.5	0	0	0	4123500	0	2061750	#DIV/0!
Q9D1G0	Deoxyribonuclease-1-like 2	Dnase1l2	6.2061	0	0	3.2	3.2	0	0	0	41010000	0	20505000	#DIV/0!
D3Z3V5;Q8BKK5	Zinc finger protein 689	Zfp689;Znf689	6.2034	0	0	5.3	5.3	0	0	0	359640000	0	179820000	#DIV/0!
A0A0G2JFP1;A0A0G2JES6;Q9JJC6	RILP-like protein 1	Rilpl1	6.2028	0	0	6.7	0	0	0	5822600	0	0	2911300	#DIV/0!
Q9Z103	Activity-dependent neuroprotector homeobox protein	Adnp	6.1854	0	0	0	1	0	0	0	0	0	0	#DIV/0!
Q5SSP3;O35874	Amino acid transporter;Neutral amino acid transporter A	Slc1a4	6.1828	0	0	2.4	0	0	0	5713500	0	0	2856750	#DIV/0!
G3X9I4;Q9JJW6	Aly/REF export factor 2	Alyref2	6.1741	9.6	15.6	24.3	24.3	0	0	0	28060000	0	14030000	#DIV/0!
A0A140LJB7;Q3MIA8;B1ATU4;G3UXW9;Q99LD4	COP9 signalosome complex subunit 1	Gps1	6.1685	0	0	2.1	2.1	0	0	24772000	0	0	12386000	#DIV/0!
Q3UHJ0	AP2-associated protein kinase 1	Aak1	6.1514	0	0	0	1.6	0	0	0	8621100	0	4310550	#DIV/0!
G8JL35;E0CYJ0;E0CXA9;Q6PEB6	MOB-like protein phocein	Mob4	6.1276	0	0	8.2	8.2	0	0	0	19297000	0	9648500	#DIV/0!
Q7TQE2;Q62523	Zyxin	Zyx	6.1227	0	0	2.3	0	0	0	11913000	0	0	5956500	#DIV/0!
A3FIN4	Phospholipid-transporting ATPase FetA	Atp8b5	6.1172	0	0	1.7	1.7	0	0	0	76273000	0	38136500	#DIV/0!
F8WH20;D3Z194;D3YTT6;Q9DBS9	Oxysterol-binding protein;Oxysterol-binding protein-related protein 3	Osbpl3	6.1164	0	0	0.9	0.9	0	0	0	1318900000	0	659450000	#DIV/0!
D3Z0F5;O88545	COP9 signalosome complex subunit 6	Cops6	6.1118	0	0	4.4	4.4	0	0	0	10842000	0	5421000	#DIV/0!
D3YZX8;P49962	Signal recognition particle 9 kDa protein	Srp9	6.111	0	0	17.5	0	0	0	14615000	0	0	7307500	#DIV/0!

## Sheet: Peptides 
Sequence	Length	Missed cleavages	Mass	Proteins	Leading razor protein	Start position	End position	Gene names	Protein names	Unique (Groups)	Unique (Proteins)	Charges	PEP	Score	Intensity	Intensity 组织+HA多肽	Intensity 组织+HA多肽重复	Intensity 组织+表达蛋白	Intensity 组织+表达蛋白重复	LFQ intensity 组织+HA多肽	LFQ intensity 组织+HA多肽重复	LFQ intensity 组织+表达蛋白	LFQ intensity 组织+表达蛋白重复
VMKGNPSATAGPK	13	1	1256.65	HA-Flag+FXQ001	HA-Flag+FXQ001	282	294			yes	yes	2	0.00070178	75.819	70095000	0	0	30610000	39485000	0	0	14658000	19525000
APQSLASSNSAQAR	14	0	1386.69	HA-Flag+FXQ001;O88809;Q6PGI2;Q9CXL6	O88809	158	171	Dcx	Neuronal migration protein doublecortin	no	no	2	1.5904e-35	164.9	7529100000	124730000	139530000	3760200000	3504600000	124730000	130350000	1800600000	1733000000
GIVYAVSSDR	10	0	1065.55	HA-Flag+FXQ001;O88809;Q6PGI2;Q9CXL6	O88809	67	76	Dcx	Neuronal migration protein doublecortin	no	no	2	4.7412e-27	175.38	907450000	36193000	33471000	442620000	395160000	36193000	31268000	211950000	195410000
IGSMDELEEGESYVCSSDNFFK	22	0	2542.05	HA-Flag+FXQ001;O88809;Q6PGI2;Q9CXL6	O88809	113	134	Dcx	Neuronal migration protein doublecortin	no	no	2	8.2525e-08	64.104	111640000	0	0	111640000	0	0	0	53458000	0
KIGSMDELEEGESYVCSSDNFFK	23	1	2670.15	HA-Flag+FXQ001;O88809;Q6PGI2;Q9CXL6	O88809	112	134	Dcx	Neuronal migration protein doublecortin	no	no	3	8.39e-08	52.483	142930000	0	0	81052000	61878000	0	0	38813000	30599000
KTAHSFEQVLTDITEAIK	18	1	2030.07	HA-Flag+FXQ001;O88809;Q6PGI2;Q9CXL6;A0A0A6YX33;A0A0A6YWI6;A0A0A6YX71;Q6PGN3	O88809	202	219	Dcx;Dclk2	Neuronal migration protein doublecortin;Serine/threonine-protein kinase DCLK2	no	no	2;3;4	9.3422e-06	74.793	329870000	0	0	173470000	156400000	0	0	83069000	77340000
LVTIIR	6	0	713.48	HA-Flag+FXQ001;O88809;Q6PGI2;Q9CXL6;A0A0G2JGQ6;Q9JLM8;Q80VB6	O88809	181	186	Dcx;Dclk1	Neuronal migration protein doublecortin;Serine/threonine-protein kinase DCLK1	no	no	2	0.036672	113.07	0	0	0	0	0	0	0	0	0
MNGLPSPTHSAHCSFYR	17	0	1960.87	HA-Flag+FXQ001;O88809;Q6PGI2;Q9CXL6	O88809	23	39	Dcx	Neuronal migration protein doublecortin	no	no	3	0.0023138	66.022	86019000	0	0	48236000	37782000	0	0	23098000	18683000
NVNPNWSVNVK	11	0	1269.65	HA-Flag+FXQ001;O88809;Q6PGI2;Q9CXL6;A0A0G2JGQ6;Q9JLM8;Q80VB6	O88809	141	151	Dcx;Dclk1	Neuronal migration protein doublecortin;Serine/threonine-protein kinase DCLK1	no	no	2	0.00074434	98.044	2547100000	174780000	168620000	984830000	1218900000	174780000	157510000	471590000	602730000
QSPISTPTSPGSLRK	15	1	1554.84	HA-Flag+FXQ001;O88809;Q6PGI2;Q9CXL6	O88809	331	345	Dcx	Neuronal migration protein doublecortin	no	no	2;3	0.00099876	78.692	252820000	0	0	192460000	60363000	0	0	92161000	29849000
QVTCLHDFFGDDDVFIACGPEK	22	0	2569.13	HA-Flag+FXQ001;O88809;Q6PGI2;Q9CXL6	O88809	235	256	Dcx	Neuronal migration protein doublecortin	no	no	2	2.6827e-36	148.41	848890000	0	0	428780000	420110000	0	0	205320000	207740000
SFDALLADLTR	11	0	1220.64	HA-Flag+FXQ001;O88809;Q6PGI2;Q9CXL6	O88809	79	89	Dcx	Neuronal migration protein doublecortin	no	no	2;3	1.4354e-15	145.84	3251400000	0	0	1600900000	1650500000	0	0	766590000	816160000
SLSDNINLPQGVR	13	0	1411.74	HA-Flag+FXQ001;O88809;Q6PGI2;Q9CXL6	O88809	90	102	Dcx	Neuronal migration protein doublecortin	no	no	2;3	2.0895e-44	176.33	9616300000	305410000	348080000	4832000000	4130800000	305410000	325160000	2313900000	2042700000
TAHSFEQVLTDITEAIK	17	0	1901.97	HA-Flag+FXQ001;O88809;Q6PGI2;Q9CXL6;A0A0A6YX33;A0A0A6YWI6;A0A0A6YX71;Q6PGN3	O88809	203	219	Dcx;Dclk2	Neuronal migration protein doublecortin;Serine/threonine-protein kinase DCLK2	no	no	2;3	6.806e-47	168.31	4147400000	0	0	2262200000	1885200000	0	0	1083300000	932240000
TLQALSNEK	9	0	1002.53	HA-Flag+FXQ001;O88809;Q6PGI2;Q9CXL6	O88809	42	50	Dcx	Neuronal migration protein doublecortin	no	no	2	0.0050179	126.24	529430000	13489000	14592000	238980000	262370000	13489000	13631000	114440000	129740000
TLQALSNEKK	10	1	1130.63	HA-Flag+FXQ001;O88809;Q6PGI2;Q9CXL6	O88809	42	51	Dcx	Neuronal migration protein doublecortin	no	no	2;3	0.0085676	122.28	2663500000	18494000	0	1359300000	1285700000	18494000	0	650910000	635760000
TSANMKAPQSLASSNSAQAR	20	1	2018.98	HA-Flag+FXQ001;O88809;Q6PGI2;Q9CXL6	O88809	152	171	Dcx	Neuronal migration protein doublecortin	no	no	2;3	0.0001532	49.089	117180000	0	0	87983000	29194000	0	0	42131000	14436000
YAQDDFSLDENECR	14	0	1760.69	HA-Flag+FXQ001;O88809;Q6PGI2;Q9CXL6	O88809	259	272	Dcx	Neuronal migration protein doublecortin	no	no	2;3	1.6827e-14	131.83	3271600000	146640000	179870000	1611200000	1333900000	146640000	168030000	771530000	659600000
YIYTIDGSR	9	0	1086.53	HA-Flag+FXQ001;O88809;Q6PGI2;Q9CXL6	O88809	103	111	Dcx	Neuronal migration protein doublecortin	no	no	2	2.0432e-06	144.38	522540000	29334000	28760000	245870000	218570000	29334000	26867000	117740000	108080000
AAAAAAAAAAGAAGGR	16	0	1197.62	G3UY42;Q8CCS6;G3UX74	G3UY42	2	17	Pabpn1	Polyadenylate-binding protein 2	yes	no	2	1.6065e-25	145.25	325710000	45843000	0	126910000	152950000	45843000	0	60774000	75633000
AAAAAAGPEMVR	12	0	1113.56	P63085	P63085	2	13	Mapk1	Mitogen-activated protein kinase 1	yes	yes	2	1.4601e-10	116.3	53030000	0	53030000	0	0	0	49538000	0	0
AAAAVVEFQR	10	0	1060.57	Q8BG32;G3UYI4;G3UYL3	Q8BG32	2	11	Psmd11	26S proteasome non-ATPase regulatory subunit 11	yes	no	2	0.007434	59.245	5824400	5824400	0	0	0	5824400	0	0	0
AAADLMAYCEAHAK	14	0	1520.68	P63213	P63213	33	46	Gng2	Guanine nucleotide-binding protein G(I)/G(S)/G(O) subunit gamma-2	yes	yes	2;3	0.019297	41.109	46511000	0	0	46511000	0	0	0	22272000	0
AAAHHYGAQCDK	12	0	1327.57	Q9DCJ5	Q9DCJ5	27	38	Ndufa8	NADH dehydrogenase [ubiquinone] 1 alpha subcomplex subunit 8	yes	yes	2	0.034415	41.876	1859300	0	1859300	0	0	0	1736900	0	0
AAAMANNLQK	10	0	1030.52	Q8VH51;E9Q8F0;F7AA45;B7ZD61	Q8VH51	235	244	Rbm39	RNA-binding protein 39	yes	no	2	0.0014575	102.71	14780000	5554800	9225500	0	0	5554800	8618100	0	0
AAAQLLQSQAQQSGAQQTK	19	0	1956	A0A0J9YTY0;A0A0J9YUL3;Q8C1B7	A0A0J9YTY0	400	418	Sept11	Septin-11	yes	no	2;3	1.9685e-05	66.068	298260000	0	0	166030000	132240000	0	0	79504000	65390000
AAATPESQEPQAK	13	0	1326.64	P28667	P28667	145	157	Marcksl1	MARCKS-related protein	yes	yes	2	0.0013372	64.04	337840000	132960000	97379000	50187000	57315000	132960000	90968000	24032000	28342000
AAAVPQR	7	0	711.403	Q62446;A0A1Y7VLK0;A0A1Y7VMJ9	Q62446	2	8	Fkbp3	Peptidyl-prolyl cis-trans isomerase FKBP3	yes	no	1;2	0.0088675	80.377	448400000	0	29572000	218620000	200200000	0	27625000	104690000	99000000
AADELEAFLGGGAPGSR	17	0	1616.78	Q5U3K5	Q5U3K5	699	715	Rabl6	Rab-like protein 6	yes	yes	2	0.0002798	74.46	24665000	0	0	24665000	0	0	0	11811000	0
AADLLYAMCDR	11	0	1297.58	P17426	P17426	389	399	Ap2a1	AP-2 complex subunit alpha-1	yes	yes	2	0.016274	53.327	54364000	24937000	29427000	0	0	24937000	27490000	0	0
AAEAGVTEEQYGYLGTSAK	19	0	1943.91	P14873	P14873	1049	1067	Map1b	Microtubule-associated protein 1B;MAP1B heavy chain;MAP1 light chain LC1	yes	yes	2	0.00074796	59.898	167440000	93116000	74324000	0	0	93116000	69430000	0	0
AAECNIVVTQPR	12	0	1356.68	A0A087WPL5;E9QNN1;O70133;Q3UR42	A0A087WPL5	437	448	Dhx9	ATP-dependent RNA helicase A	yes	no	2	0.00071999	96.015	226000000	0	74064000	151940000	0	0	69188000	72757000	0
AAEDLFVNIR	10	0	1146.6	A2AS98;P28660	A2AS98	312	321	Nckap1	Nck-associated protein 1	yes	no	2	0.013514	69.825	87573000	0	0	87573000	0	0	0	41935000	0
AAESALQVVEK	11	0	1143.61	Q8CB77	Q8CB77	2	12	Tceb3	Transcription elongation factor B polypeptide 3	yes	yes	2	0.0012807	60.518	99398000	0	0	45645000	53753000	0	0	21858000	26581000
AAESSAMAATEK	12	0	1165.53	Q9Z1P6	Q9Z1P6	81	92	Ndufa7	NADH dehydrogenase [ubiquinone] 1 alpha subcomplex subunit 7	yes	yes	2	0.00073261	85.958	60461000	28490000	31971000	0	0	28490000	29866000	0	0
AAETVELHK	9	0	996.524	Q9D1J3;A0A1W2P6N2	Q9D1J3	2	10	Sarnp	SAP domain-containing ribonucleoprotein	yes	no	2	0.0038588	71.379	31116000	15933000	15183000	0	0	15933000	14183000	0	0
AAEVYGVR	8	0	863.45	Q9R1Q8	Q9R1Q8	99	106	Tagln3	Transgelin-3	yes	yes	2	0.020067	100.74	46570000	24679000	21891000	0	0	24679000	20450000	0	0
AAFAPFGR	8	0	835.434	D3Z4H6;P52912;D3YY02;Q8CII5;G5E8L2;Q80ZW7;A0A0N4SUX1	D3Z4H6	124	131	Tia1	Nucleolysin TIA-1	no	no	2	0.037898	79.454	5069900	5069900	0	0	0	5069900	0	0	0
AAFDDAIAELDTLSEESYK	19	0	2086.96	P62259	P62259	197	215	Ywhae	14-3-3 protein epsilon	yes	yes	2;3	4.4736e-14	91.401	1324200000	0	0	684220000	639940000	0	0	327650000	316450000
AAFSKDESKEPIVEVR	16	2	1803.94	P13595;A0A0A6YY91;A0A0A6YY47;E9QB01	P13595	767	782	Ncam1	Neural cell adhesion molecule 1	no	no	2;4	0.00018817	97.86	691650000	34481000	21147000	393440000	242580000	34481000	19755000	188400000	119950000
AAGAAAIITEPEHTK	15	0	1478.77	Q8BK67;A2AWQ2	Q8BK67	76	90	Rcc2	Protein RCC2	yes	no	2;3	0.00049533	84.17	332050000	95563000	98992000	50163000	87328000	95563000	92475000	24021000	43183000
AAGMGSYVQPQR	12	0	1263.6	Q9DB42	Q9DB42	105	116	Znf593	Zinc finger protein 593	yes	yes	2	0.0078451	56.563	0	0	0	0	0	0	0	0	0
AAGMLSQLDLFSR	13	0	1407.72	Q61249	Q61249	53	65	Igbp1	Immunoglobulin-binding protein 1	yes	yes	2	0.003766	58.676	25613000	0	0	25613000	0	0	0	12265000	0
AAGTLYTYPENWR	13	0	1540.73	Q9D8N0	Q9D8N0	2	14	Eef1g	Elongation factor 1-gamma	yes	yes	2	1.4338e-07	87.913	264940000	90903000	98484000	40965000	34590000	90903000	92000000	19616000	17105000
AAGVEAAAEVAATEPK	16	0	1483.75	Q9D0E1;B8JK33;B8JK32	Q9D0E1	2	17	Hnrnpm	Heterogeneous nuclear ribonucleoprotein M	yes	no	2	7.9296e-05	102.4	103210000	39594000	39050000	0	24565000	39594000	36479000	0	12147000
AAHLCAEAALR	11	0	1181.6	P50580	P50580	145	155	Pa2g4	Proliferation-associated protein 2G4	yes	yes	2;3	0.00051121	73.985	260680000	87884000	61530000	77630000	33633000	87884000	57479000	37174000	16632000
AAHVFFTDSCPDALFNELVK	20	0	2280.09	O08599;A0A140LHJ4	O08599	101	120	Stxbp1	Syntaxin-binding protein 1	yes	no	3	7.4925e-06	60.564	85618000	0	0	41056000	44562000	0	0	19660000	22036000
AAIAAAAAAAAAK	13	0	1040.6	Q9CR57	Q9CR57	148	160	Rpl14	60S ribosomal protein L14	yes	yes	2	0.00070083	107.69	79768000	24099000	24045000	0	31624000	24099000	22462000	0	15638000
AAIDWFDGK	9	0	1021.49	Q8CFQ9;P56959;G3UXT7;F6QCI0;Q8BQ46	Q8CFQ9	341	349	Fus;Taf15	RNA-binding protein FUS	no	no	2	0.0049056	104.44	1788100000	58594000	65371000	864100000	800060000	58594000	61068000	413780000	395630000
AAIDWFDGKEFHGNIIK	17	1	1959.98	F6QCI0;Q8BQ46	F6QCI0	103	119	Taf15		yes	no	3;4	7.0644e-06	81.428	1587200000	0	0	846550000	740670000	0	0	405380000	366260000
AAIDWFDGKEFSGNPIK	17	1	1893.93	Q8CFQ9;P56959;G3UXT7	Q8CFQ9	341	357	Fus	RNA-binding protein FUS	yes	no	2;3	4.0183e-05	82.85	4052500000	278490000	0	3665800000	108170000	278490000	0	1755400000	53488000
AAILQTEVDALR	12	0	1298.72	V9GWT6;V9GXH3;F8VPM7;Q99MI1;V9GXF0;V9GXP8;Q3UHT7;Q6PH08	V9GWT6	489	500	Erc1;Erc2	ELKS/Rab6-interacting/CAST family member 1;ERC protein 2	yes	no	2	0.00058332	93.111	82203000	20179000	0	62024000	0	20179000	0	29701000	0
AALAGGTTMIIDHVVPEPESSLTEAYEK	28	0	2928.44	Q3TT92;E9PWE8;Q62188	Q3TT92	93	120	Dpysl3	Dihydropyrimidinase-related protein 3	yes	no	3;4	5.1856e-05	38.843	388330000	0	0	209740000	178580000	0	0	100440000	88310000
AALCAVHVIR	10	0	1108.62	Q8CBB7;P22892	Q8CBB7	157	166	Ap1g1	AP-1 complex subunit gamma-1	yes	no	3	0.021912	43.282	16932000	0	0	0	16932000	0	0	0	8373000
AALEAQNALHNIK	13	0	1391.75	A0A0R4J2B0;V9GX43;S4R2U7;S4R1S7;E9QA47;Q9Z0H4;S4R2J2;S4R2L5;A3KGT0	A0A0R4J2B0	71	83	Celf2	CUGBP Elav-like family member 2	yes	no	2	0.014338	51.528	18170000	0	0	18170000	0	0	0	8700700	0
AALEELVR	8	0	899.508	Q61035;A0A494BAV2	Q61035	5	12	Hars	Histidine--tRNA ligase, cytoplasmic	yes	no	2	0.010847	89.142	0	0	0	0	0	0	0	0	0
AALIYTCTVCR	11	0	1326.64	Q9D115	Q9D115	35	45	Znf706	Zinc finger protein 706	yes	yes	2	0.0020543	74.464	374150000	95475000	74414000	106810000	97453000	95475000	69515000	51145000	48190000
AALLEVFQEAHEQSVGMLHLTESINR	26	0	2921.47	P25206	P25206	753	778	Mcm3	DNA replication licensing factor MCM3	yes	yes	4	0.00012185	42.106	18233000	0	0	18233000	0	0	0	8730800	0
AALPQTTIHGAPAR	14	0	1402.77	E9PV26;H3BLA4;H3BJU6	E9PV26	100	113	Prr36		yes	no	3	0.00051528	63.181	36632000	7690100	9135900	0	19806000	7690100	8534400	0	9793900
AALQELLSK	9	0	971.565	A0A1L1SQA8;P62852	A0A1L1SQA8	54	62	Rps25	40S ribosomal protein S25	yes	no	2	0.00024166	127.56	4003000000	127560000	167040000	1899700000	1808700000	127560000	156050000	909690000	894400000
AALVGGTTMIIGHVLPDKETSLVEAYEK	28	1	2941.55	Q9EQF6	Q9EQF6	88	115	Dpysl5	Dihydropyrimidinase-related protein 5	yes	yes	4	3.6203e-08	52.685	137760000	0	0	137760000	0	0	0	65968000	0
AAMLGQEDPPQHGLPR	16	0	1715.84	P19096;A0A0U1RNJ1	P19096	1160	1175	Fasn	Fatty acid synthase;[Acyl-carrier-protein] S-acetyltransferase;[Acyl-carrier-protein] S-malonyltransferase;3-oxoacyl-[acyl-carrier-protein] synthase;3-oxoacyl-[acyl-carrier-protein] reductase;3-hydroxyacyl-[acyl-carrier-protein] dehydratase;Enoyl-[acyl-carrier-protein] reductase;Oleoyl-[acyl-carrier-protein] hydrolase	yes	no	3	0.0011413	37.555	21842000	21842000	0	0	0	21842000	0	0	0
AANAASGAGGSSAAAGSR	18	0	1432.67	A0A087WNP6;Q4VAA2	A0A087WNP6	28	45	Cdv3	Protein CDV3	yes	no	2	0.005279	40.475	29219000	0	29219000	0	0	0	27295000	0	0
AANATMATSGSAR	13	0	1207.56	Q91VC3;A2AFK7	Q91VC3	2	14	Eif4a3	Eukaryotic initiation factor 4A-III;Eukaryotic initiation factor 4A-III, N-terminally processed	yes	no	2	0.017205	41.54	18424000	18424000	0	0	0	18424000	0	0	0
AAPAAAAAMAPPGPR	15	0	1318.68	Q8BMF4	Q8BMF4	392	406	Dlat	Dihydrolipoyllysine-residue acetyltransferase component of pyruvate dehydrogenase complex, mitochondrial	yes	yes	2	0.0016328	62.463	11313000	11313000	0	0	0	11313000	0	0	0
AAPFTLEYR	9	0	1066.54	Q9D819	Q9D819	10	18	Ppa1	Inorganic pyrophosphatase	yes	yes	2	0.0089604	96.492	33392000	16354000	17038000	0	0	16354000	15916000	0	0
AAQALAAQAVASR	13	0	1226.67	Q8BLY2	Q8BLY2	2	14	Tarsl2	Probable threonine--tRNA ligase 2, cytoplasmic	yes	yes	2	0.00025877	69.979	7027700	0	7027700	0	0	0	6565000	0	0
AAQDRDQIYR	10	1	1234.61	F8WJG3;P62996	F8WJG3	152	161	Tra2b	Transformer-2 protein homolog beta	yes	no	2;3	1.9619e-05	107.79	98193000	35741000	23456000	0	38996000	35741000	21912000	0	19284000
AAQGEPQVQFK	11	0	1201.61	P62827;Q61820	P62827	2	12	Ran;Rasl2-9	GTP-binding nuclear protein Ran;GTP-binding nuclear protein Ran, testis-specific isoform	yes	no	2	0.00029222	76.827	405330000	110720000	123560000	80351000	90692000	110720000	115430000	38477000	44847000
AAQPPTETAESSQAEEEKDAVDEAKPK	27	2	2855.33	P06837	P06837	182	208	Gap43	Neuromodulin	yes	yes	4	0.0012752	32.708	436640000	0	171490000	123740000	141410000	0	160200000	59255000	69927000
AAQSAPK	7	0	671.36	E9PW20;Q9CY57;D3YZA1;D3Z7T7	E9PW20	2	8	Chtop	Chromatin target of PRMT1 protein	yes	no	1	0.018723	46.37	5912800	5912800	0	0	0	5912800	0	0	0
AAQVAQDEEIAR	12	0	1299.64	F6UK66;A0A668KL36;Q810U5	F6UK66	198	209	Ccdc50	Coiled-coil domain-containing protein 50	yes	no	2	0.026384	51.927	11555000	0	11555000	0	0	0	10794000	0	0
AASDIAMTELPPTHPIR	17	0	1818.93	P62259	P62259	154	170	Ywhae	14-3-3 protein epsilon	yes	yes	2;3	0.00011857	47.548	729200000	0	0	403380000	325820000	0	0	193160000	161120000
AASIFGGAKPVDTAAR	16	1	1530.82	Q8BGD9;B2RWE8	Q8BGD9	357	372	Eif4b	Eukaryotic translation initiation factor 4B	yes	no	2;3	0.0045786	48.741	127200000	16663000	4590700	48801000	57142000	16663000	4288400	23369000	28257000
AATEPPSLR	9	0	940.498	Q61136	Q61136	2	10	Prpf4b	Serine/threonine-protein kinase PRP4 homolog	yes	yes	2	0.020444	40.103	812090000	0	0	0	812090000	0	0	0	401580000
AATFFGEVVK	10	0	1067.57	A0A3B2WB82;Q9JK23;A0A3B2W3V4	A0A3B2WB82	2	11	Psmg1	Proteasome assembly chaperone 1	yes	no	2	0.012238	41.448	5482800	0	5482800	0	0	0	5121800	0	0
AATGEEVSAEDLGGADLHCR	20	0	2056.91	Q3ULD5	Q3ULD5	249	268	Mccc2	Methylcrotonoyl-CoA carboxylase beta chain, mitochondrial	yes	yes	3	0.0024756	35.044	44647000	23097000	21550000	0	0	23097000	20131000	0	0
AATMSEPR	8	0	861.401	Q9DCC4	Q9DCC4	2	9	Pycrl	Pyrroline-5-carboxylate reductase 3	yes	yes	2	0.028498	57.281	2270800	2270800	0	0	0	2270800	0	0	0
AATSPALFNR	10	0	1046.55	Q9JHU4	Q9JHU4	3077	3086	Dync1h1	Cytoplasmic dynein 1 heavy chain 1	yes	yes	2	0.0068515	79.713	13160000	7318200	5841300	0	0	7318200	5456700	0	0
AATTNPSQGEDLKMDEGNFK	20	1	2151.97	P13595;A0A0A6YY91	P13595	1010	1029	Ncam1	Neural cell adhesion molecule 1	yes	no	3	0.0033117	39.387	74178000	0	0	74178000	0	0	0	35521000	0
AAVASLLQSVQVPEFTPK	18	0	1884.04	Q02053	Q02053	785	802	Uba1	Ubiquitin-like modifier-activating enzyme 1	yes	yes	2;3	6.9823e-06	74.428	342810000	0	0	171760000	171050000	0	0	82249000	84585000
AAVAVPNRPPDAVLR	15	1	1544.88	P51660	P51660	479	493	Hsd17b4	Peroxisomal multifunctional enzyme type 2;(3R)-hydroxyacyl-CoA dehydrogenase;Enoyl-CoA hydratase 2	yes	yes	3	0.00021359	67.964	5670400	5670400	0	0	0	5670400	0	0	0
AAVDSFYLLYR	11	0	1316.68	Q8BTX9	Q8BTX9	2	12	Hsdl1	Inactive hydroxysteroid dehydrogenase-like protein 1	yes	yes	2	0.00026584	79.906	23066000	0	0	14652000	8413600	0	0	7016300	4160500
AAVENLPTFLVELSR	15	0	1657.9	P70168	P70168	28	42	Kpnb1	Importin subunit beta-1	yes	yes	2	0.00071716	78.692	103810000	0	0	53921000	49890000	0	0	25821000	24671000
AAVESLGFILFR	12	0	1321.74	Q3TXS7	Q3TXS7	617	628	Psmd1	26S proteasome non-ATPase regulatory subunit 1	yes	yes	2	0.001601	90.629	40454000	0	0	19727000	20728000	0	0	9446300	10250000
AAVEWFDGK	9	0	1021.49	Q5SUT0;Q5SUS9;Q61545	Q5SUT0	387	395	Ewsr1	RNA-binding protein EWS	yes	no	2	0.00026849	127.02	166730000	15793000	15857000	67040000	68037000	15793000	14813000	32102000	33644000
AAVEWFDGKDFQGSK	15	1	1683.79	Q5SUT0;Q5SUS9;Q61545	Q5SUT0	387	401	Ewsr1	RNA-binding protein EWS	yes	no	2;3	7.9581e-18	120.3	2075500000	133400000	225580000	992770000	723760000	133400000	210730000	475400000	357900000
AAVSGLWGK	9	0	887.486	A8DUK4;E9Q223	A8DUK4	10	18	Hbbt1;Hbb-bs		yes	no	2	0.00057333	122.13	735060000	159580000	198340000	195620000	181510000	159580000	185280000	93677000	89758000
AAYFGVYDTAK	11	0	1204.58	P48962	P48962	189	199	Slc25a4	ADP/ATP translocase 1	yes	yes	2	0.0043103	66.568	109000000	0	109000000	0	0	0	101820000	0	0
ACALSIAESCRPGDKVPSIK	20	2	2158.09	Q8K2B3	Q8K2B3	466	485	Sdha	Succinate dehydrogenase [ubiquinone] flavoprotein subunit, mitochondrial	yes	yes	4	0.0010625	37.969	30632000	17708000	12923000	0	0	17708000	12072000	0	0
ACGLNFADLMGR	12	0	1323.61	Q62465	Q62465	98	109	Vat1	Synaptic vesicle membrane protein VAT-1 homolog	yes	yes	2	0.0029423	63.283	23933000	0	0	0	23933000	0	0	0	11835000
ACNQLGQFLQHR	12	0	1470.71	P17426;P17427	P17427	329	340	Ap2a1;Ap2a2	AP-2 complex subunit alpha-1;AP-2 complex subunit alpha-2	no	no	3	0.010564	42.556	11029000	11029000	0	0	0	11029000	0	0	0
ACQSIYPLHDVFVR	14	0	1703.85	P97351	P97351	200	213	Rps3a	40S ribosomal protein S3a	yes	yes	2;3	0.00019406	83.397	1591300000	264500000	232010000	692080000	402690000	264500000	216730000	331410000	199130000
ACVIHGTDLK	10	0	1112.56	A0A0G2JGX4;Q8VCE0;Q6PIC6	A0A0G2JGX4	665	674	Atp1a3	Sodium/potassium-transporting ATPase subunit alpha-3	yes	no	2	0.013905	69.423	22890000	9868700	13022000	0	0	9868700	12164000	0	0
ACYLSINPQKDETLETEK	18	1	2138.02	P61164;A0A494BB86	P61164	221	238	Actr1a	Alpha-centractin	yes	no	3	0.00065784	42.913	191330000	0	0	94232000	97093000	0	0	45124000	48013000
ADDGRPFPQVIK	12	1	1341.7	A6ZI44;P05064;D3YWI1;Q9CPQ9;A6ZI46;D3Z510;A0A0U1RPN8;D3YV98;A0A0U1RPT5	A6ZI44	142	153	Aldoa;Aldoart1	Fructose-bisphosphate aldolase;Fructose-bisphosphate aldolase A	yes	no	3	0.042834	28.361	50714000	0	50714000	0	0	0	47376000	0	0
ADDIDIEAMLEAPYKK	16	1	1820.89	Q8VH51;E9Q8F0;B7ZD61;B7ZD63;B7ZD64;E9PZF9;D6RCZ8;E9Q999;D6RJ85	Q8VH51	2	17	Rbm39	RNA-binding protein 39	yes	no	2	7.523e-06	125.28	58351000	0	0	58351000	0	0	0	27942000	0
ADEGISFR	8	0	893.424	P35700;B1AXW5;B1AXW6	P35700	121	128	Prdx1	Peroxiredoxin-1	yes	no	2	0.0089331	97.798	380240000	380240000	0	0	0	380240000	0	0	0
ADETKDEQFEEYVQNFK	17	1	2118.94	A0A0G2JEG8;A0A668KM31;Q7TQF7	A0A0G2JEG8	31	47	Amph	Amphiphysin	yes	no	3	0.00027438	52.522	105670000	0	0	50163000	55503000	0	0	24021000	27446000
ADETKDEQFEQCVQNFNK	18	1	2228.96	A0A3Q4EBK4;Q6P1B9;O08539	A0A3Q4EBK4	36	53	Bin1	Myc box-dependent-interacting protein 1	yes	no	3	0.00091803	48.547	76458000	0	0	40942000	35516000	0	0	19605000	17563000
ADHGEPIGR	9	0	950.457	P11499	P11499	169	177	Hsp90ab1	Heat shock protein HSP 90-beta	yes	yes	2;3	0.00036244	121.09	180200000	40336000	30961000	58442000	50456000	40336000	28923000	27985000	24951000
ADHQPLTEASYVNLPTIALCNTDSPLR	27	0	2995.47	P14206;A0A1L1SRW0	P14206	129	155	Rpsa	40S ribosomal protein SA	yes	no	3	3.0601e-19	102.27	456570000	0	0	219130000	237440000	0	0	104930000	117410000
ADIDKLNIDSIIQR	14	1	1612.88	P63087;A0A0G2JGC1	P63087	2	15	Ppp1cc	Serine/threonine-protein phosphatase PP1-gamma catalytic subunit	yes	no	2	0.0042403	49.5	22778000	0	0	0	22778000	0	0	0	11264000
ADIDLTKR	8	1	930.513	F6YVP7;P62270;A0A1Y7VKY1;S4R1N6	F6YVP7	48	55	Gm10260;Rps18	40S ribosomal protein S18	yes	no	3	0.031378	73.665	63064000	0	0	63064000	0	0	0	30199000	0
ADIFVDPVLHTACALDIK	18	0	1997.03	F8WHM5;Q61543;F6RSH1	F8WHM5	1044	1061	Glg1	Golgi apparatus protein 1	yes	no	3	2.976e-05	66.965	59919000	0	0	31638000	28281000	0	0	15150000	13985000
ADIQTER	7	0	831.409	P62281;A0A1B0GRR3	P62281	2	8	Rps11	40S ribosomal protein S11	yes	no	2	0.033794	42.869	5662600	0	5662600	0	0	0	5289800	0	0
ADIVENQVMDTR	12	0	1389.66	A2AE89;P10649;F6WHQ7	A2AE89	97	108	Gstm1	Glutathione S-transferase Mu 1	yes	no	2	0.015747	49.35	68820000	34342000	34478000	0	0	34342000	32208000	0	0
ADKEAAFDDAVEER	14	1	1564.7	Q60972	Q60972	2	15	Rbbp4	Histone-binding protein RBBP4	yes	yes	2	0.00027792	94.122	111920000	0	0	0	111920000	0	0	0	55346000
ADKLAEEHGS	10	1	1055.49	P56480	P56480	520	529	Atp5b	ATP synthase subunit beta, mitochondrial	yes	yes	2	0.042423	65.246	2416700	0	2416700	0	0	0	2257600	0	0
ADKMDMSLDDIIK	13	1	1493.71	G3X9I4;Q9JJW6;O08583	O08583	2	14	Alyref2;Alyref	Aly/REF export factor 2;THO complex subunit 4	no	no	2	1.4545e-06	101.89	2504800000	0	191680000	422870000	1890200000	0	179060000	202490000	934700000
ADLIAYLK	8	0	905.522	P62897	P62897	93	100	Cycs	Cytochrome c, somatic	yes	yes	2	0.034103	89.55	247670000	0	10581000	125710000	111380000	0	9884800	60197000	55076000
ADLINNLGTIAK	12	0	1241.7	P11499;P07901;B7ZC50	P07901	101	112	Hsp90ab1;Hsp90aa1	Heat shock protein HSP 90-beta;Heat shock protein HSP 90-alpha	no	no	2	0.0013512	78.655	484490000	229830000	254660000	0	0	229830000	237890000	0	0
ADLSLDELIR	10	0	1143.61	Q8BG81;Q3UDD3;F6VR84	Q8BG81	2	11	Poldip3	Polymerase delta-interacting protein 3	yes	no	2	2.4254e-14	152.47	139810000	0	0	72809000	67005000	0	0	34865000	33134000
ADMQNLVER	9	0	1074.51	P40124;B1ARS0	P40124	2	10	Cap1	Adenylyl cyclase-associated protein 1;Adenylyl cyclase-associated protein	yes	no	2	0.0072925	56.258	4785300	0	4785300	0	0	0	4470200	0	0
ADQLTEEQIAEFK	13	0	1520.74	P0DP28;P0DP27;P0DP26;Q9D6P8	P0DP28	2	14	Calml3	Calmodulin-like protein 3	yes	no	2	7.9924e-06	113.63	894620000	0	50910000	843710000	0	0	47558000	404020000	0
ADRDESSPYAAMLAAQDVAQR	21	1	2264.05	P62264;D3YVF4;D3Z7I1	P62264	64	84	Rps14	40S ribosomal protein S14	yes	no	3	2.0377e-07	67.251	1093800000	0	0	551600000	542200000	0	0	264140000	268120000
ADSLVEGTSSR	11	0	1120.54	D3Z491;A0A3Q4EH87;A0A3Q4EBV9;E0CXC2;A0A3Q4EHZ1;Q9DBC3	D3Z491	72	82	Cmtr1;Gm28043	Cap-specific mRNA (nucleoside-2-O-)-methyltransferase 1	yes	no	2	0.0064689	66.27	0	0	0	0	0	0	0	0	0
AEAGAGSATEFQFR	14	0	1440.66	P63325	P63325	140	153	Rps10	40S ribosomal protein S10	yes	yes	2	0.0073949	49.189	178860000	0	178860000	0	0	0	167080000	0	0
AECCVPVCPR	10	0	1246.53	Q60930;D3YUN8;D3YZT5;A0A286YCR8	Q60930	2	11	Vdac2	Voltage-dependent anion-selective channel protein 2	yes	no	2	0.0040387	57.177	11958000	0	11958000	0	0	0	11170000	0	0
AEDGAAPSPSSETPK	15	0	1442.65	P26645	P26645	131	145	Marcks	Myristoylated alanine-rich C-kinase substrate	yes	yes	2	0.022226	36.528	35483000	0	35483000	0	0	0	33147000	0	0
AEDKEWIPVTK	11	1	1314.68	P25444;D3YVC1;D3YWJ3	P25444	55	65	Rps2	40S ribosomal protein S2	yes	no	2	0.0039227	70.399	77260000	77260000	0	0	0	77260000	0	0	0
AEEAGIGDTPNQEDQAAGHVTQAR	24	0	2464.12	B1AQW2;B1AQW4	B1AQW2	34	57	Mapt	Microtubule-associated protein	yes	no	3	2.0601e-11	91.729	1222200000	456660000	396340000	206690000	162500000	456660000	370250000	98976000	80358000
AEGDIEHMTEGFK	13	0	1462.64	P28658	P28658	359	371	Atxn10	Ataxin-10	yes	yes	2;3	0.0021419	61.353	56745000	21488000	35258000	0	0	21488000	32936000	0	0
AEGQVLVLDGR	11	0	1155.62	P19253;A0A1B0GSB2;A0A1B0GSL5;A0A1B0GSC2;A0A1B0GRH1	P19253	2	12	Rpl13a	60S ribosomal protein L13a	yes	no	2	0.0031187	61.815	138610000	68336000	70276000	0	0	68336000	65649000	0	0
AEGSLHSSPAGPSSSK	16	0	1497.71	A0A1B0GRU3;E9Q8K8;Q6ZPZ3	A0A1B0GRU3	786	801	Zc3h4	Zinc finger CCCH domain-containing protein 4	yes	no	2	0.0056511	43.544	11040000	0	0	0	11040000	0	0	0	5459200
AEGYEVAHGGR	11	0	1144.53	F7BX26;Q60676	F7BX26	408	418	Ppp5c	Serine/threonine-protein phosphatase;Serine/threonine-protein phosphatase 5	yes	no	2	0.027406	57.96	7603500	7603500	0	0	0	7603500	0	0	0
AELAELPLR	9	0	1010.58	Q9EQH3	Q9EQH3	574	582	Vps35	Vacuolar protein sorting-associated protein 35	yes	yes	2	0.020418	75.213	7362500	3124200	4238300	0	0	3124200	3959300	0	0
AELDDTPMR	9	0	1046.47	Q8VIJ6	Q8VIJ6	342	350	Sfpq	Splicing factor, proline- and glutamine-rich	yes	yes	2	3.4001e-09	155	70295000	31858000	38437000	0	0	31858000	35906000	0	0
AELDGTILK	9	0	958.534	Q8R326	Q8R326	134	142	Pspc1	Paraspeckle component 1	yes	yes	2	0.040481	61.999	12297000	12297000	0	0	0	12297000	0	0	0
AELNEFLTR	9	0	1091.56	P62908;D3YV43;A0A140LI77	P62908	19	27	Rps3	40S ribosomal protein S3	yes	no	2	6.9044e-05	131.06	335110000	91498000	110320000	58895000	74397000	91498000	103060000	28202000	36789000
AENFFILR	8	0	1008.54	P59999;Q3TX55;E9PWA7	P59999	98	105	Arpc4	Actin-related protein 2/3 complex subunit 4	yes	no	2	2.9224e-13	162.07	108540000	27170000	29275000	25633000	26462000	27170000	27347000	12275000	13086000
AENPGLENHR	10	0	1135.54	O35344	O35344	2	11	Kpna3	Importin subunit alpha-4	yes	yes	2	0.0010025	80.219	77629000	0	0	40438000	37192000	0	0	19364000	18391000
AEPEDHYFLLTEPPLNTPENR	21	0	2481.18	Q99JY9;A0A087WRA1;A0A087WP86;A0A087WQ14;A0A087WS98;A0A087WQ83	Q99JY9	103	123	Actr3	Actin-related protein 3	yes	no	3	8.3102e-08	49.973	204670000	56839000	56642000	40796000	50397000	56839000	52913000	19536000	24921000
AEQGTVLIGSER	12	0	1258.65	Q7TT37	Q7TT37	28	39	Ikbkap	Elongator complex protein 1	yes	yes	2	0.011954	51.927	11690000	0	11690000	0	0	0	10921000	0	0
AESLQQEVEALKER	14	1	1628.84	D3YX34;E9Q586;E9Q3M3;O08788	D3YX34	184	197	Dctn1	Dynactin subunit 1	yes	no	3	0.024936	29.363	5160700	5160700	0	0	0	5160700	0	0	0
AETMTVSSLAIR	12	0	1277.66	A2AUK7;A2AUK8;A2AUK5;E9PV14;Q9Z2H5	A2AUK7	547	558	Epb4.1l1;Epb41l1	Band 4.1-like protein 1	yes	no	2	0.011125	52.49	41172000	23334000	17837000	0	0	23334000	16663000	0	0
AEVEETLKR	9	1	1073.57	P62627	P62627	2	10	Dynlrb1	Dynein light chain roadblock-type 1	yes	yes	2	0.0037689	60.91	28746000	14879000	13867000	0	0	14879000	12954000	0	0
AEVLSEEPILK	11	0	1226.68	A0A087WQS2;Q9CQC6	A0A087WQS2	401	411	Bzw1	Basic leucine zipper and W2 domain-containing protein 1	yes	no	2	0.014632	54.608	31651000	14615000	17036000	0	0	14615000	15914000	0	0
AEVSELPNVVR	11	0	1211.65	Q9CZD3	Q9CZD3	687	697	Gars	Glycine--tRNA ligase	yes	yes	2	0.012402	56.729	42549000	0	0	20975000	21574000	0	0	10044000	10668000
AEVVLGNIIK	10	0	1054.64	E0CXZ9;Q3UPV6;A0A571BGH0;A0A571BF54;A0A571BEM7;P62482;A0A571BFX6;A0A571BE49;E0CXI4	E0CXZ9	28	37	Kcnab2	Voltage-gated potassium channel subunit beta-2	yes	no	2	0.023007	60.436	8526700	0	0	0	8526700	0	0	0	4216400
AEYLASIFGTEKDK	14	1	1570.79	Q9D883;G3UW94;E9Q5Y2;E9PUZ3;E9Q1I7;Q8BGJ9;E9PWX6;A0A494BA95;E9PWM2;A0A494B9X9;E9Q809;F8WH71;E9Q5J3	Q9D883	2	15	U2af1;U2af1l4	Splicing factor U2AF 35 kDa subunit;Splicing factor U2AF 26 kDa subunit	yes	no	2	0.00031278	76.533	577300000	0	0	316860000	260430000	0	0	151730000	128780000
AFAAQEDLEK	10	0	1120.54	A0A5F8MPB9;P26043	A0A5F8MPB9	449	458	Rdx	Radixin	yes	no	2	0.030302	68.224	13308000	0	13308000	0	0	0	12432000	0	0
AFAFVTFADDKVAQSLCGEDLIIK	24	1	2657.34	Q921F2;A0A087WRZ5;Q8R0B4;Q8BLD4;Q6VYI5;Q6VYI4;A0A087WQA5;A0A087WS17;A0A087WQX8;A0A087WNY6;A0A087WS74;A0A087WRP4;H3BJV1;A0A087WSH7	Q921F2	228	251	Tardbp	TAR DNA-binding protein 43	yes	no	3	0.0088243	33.348	47643000	0	0	0	47643000	0	0	0	23559000
AFAMIIDKLEEDINSSMTNSTAASRPPVTLR	31	2	3377.7	P60335	P60335	71	101	Pcbp1	Poly(rC)-binding protein 1	yes	yes	4	3.507e-18	74.274	162740000	0	0	83671000	79072000	0	0	40067000	39101000
AFANLR	6	0	690.381	Q61753	Q61753	2	7	Phgdh	D-3-phosphoglycerate dehydrogenase	yes	yes	2	0.027568	61.325	6750500	2716300	4034200	0	0	2716300	3768600	0	0
AFAVGVQQVLLK	12	0	1271.76	Q9EPL8	Q9EPL8	295	306	Ipo7	Importin-7	yes	yes	2	0.02798	43.083	18089000	0	0	18089000	0	0	0	8662200	0
AFDLGATGVMTDYPTK	16	0	1685.8	Q9CRY7	Q9CRY7	289	304	Gdpd1	Glycerophosphodiester phosphodiesterase domain-containing protein 1	yes	yes	2	0.013612	38.634	21282000	21282000	0	0	0	21282000	0	0	0
AFDQGADAIYEHINEGK	17	0	1876.86	Q8R1I1	Q8R1I1	35	51	Uqcr10	Cytochrome b-c1 complex subunit 9	yes	yes	3	0.0049362	29.687	467010000	0	0	227510000	239500000	0	0	108950000	118430000
AFDSGIIPMEFVNK	14	0	1566.78	Q3V117;Q91V92	Q3V117	949	962	Acly	ATP-citrate synthase	yes	no	2	0.0015309	85.958	179710000	56227000	44738000	33075000	45672000	56227000	41792000	15838000	22585000
AFFDLIDADTK	11	0	1254.61	Q3UUQ7	Q3UUQ7	298	308	Pgap1	GPI inositol-deacylase	yes	yes	2	0.0011172	91.584	46753000	0	0	26828000	19925000	0	0	12847000	9853000
AFFESHPAPSAER	13	0	1444.67	F6QYF8;Q11011	F6QYF8	827	839	Npepps	Puromycin-sensitive aminopeptidase	yes	no	2	0.0050388	54.066	112030000	0	0	112030000	0	0	0	53648000	0
AFFSEVER	8	0	983.471	P50580	P50580	264	271	Pa2g4	Proliferation-associated protein 2G4	yes	yes	2	0.0076246	117.93	36852000	0	21563000	0	15289000	0	20144000	0	7560300
AFFSGSQR	8	0	898.43	Q8BHN3	Q8BHN3	603	610	Ganab	Neutral alpha-glucosidase AB	yes	yes	2	0.035751	85.359	23812000	0	0	0	23812000	0	0	0	11775000
AFGFSHLEALLDDSKELQR	19	1	2175.1	D3YWF6;Q7TQI3;D3Z7K0	D3YWF6	65	83	Otub1	Ubiquitin thioesterase OTUB1	yes	no	3	0.00038033	48.677	54382000	0	0	0	54382000	0	0	0	26892000
AFGLGVAYR	9	0	952.513	Q7TPM6	Q7TPM6	368	376	Fsd1	Fibronectin type III and SPRY domain-containing protein 1	yes	yes	2	0.027226	70.268	3893700	3893700	0	0	0	3893700	0	0	0
AFGYYGPLR	9	0	1042.52	P84104	P84104	29	37	Srsf3	Serine/arginine-rich splicing factor 3	yes	yes	2	5.9399e-06	139.92	362110000	0	0	179380000	182730000	0	0	85899000	90361000
AFHNEAQVNPER	12	0	1410.66	P11983	P11983	469	480	Tcp1	T-complex protein 1 subunit alpha	yes	yes	2;3	0.00095024	81.865	138030000	37874000	39068000	32971000	28118000	37874000	36496000	15789000	13904000
AFIITGQTYTR	11	0	1269.67	A0A140LHU1;E9Q3T7;E9Q242;P54822	A0A140LHU1	55	65	Adsl	Adenylosuccinate lyase	yes	no	2	0.0043538	66.435	58672000	0	24509000	19571000	14592000	0	22895000	9371800	7216000
AFITNIPFDVK	11	0	1263.69	Q9D0E1;B8JK33;B8JK32;A0A3Q4EH91	Q9D0E1	72	82	Hnrnpm	Heterogeneous nuclear ribonucleoprotein M	yes	no	2	0.0055264	73.985	137840000	65319000	72524000	0	0	65319000	67750000	0	0
AFLADPSAFAAAAPAAAATTAAPAAAAAPAK	31	0	2695.4	P14869	P14869	267	297	Rplp0	60S acidic ribosomal protein P0	yes	yes	3	0.025426	11.998	123500000	123500000	0	0	0	123500000	0	0	0
AFLTLAEDILR	11	0	1260.71	P61027	P61027	162	172	Rab10	Ras-related protein Rab-10	yes	yes	2	1.0963e-07	129.1	190870000	0	0	103100000	87776000	0	0	49369000	43405000
AFSIQGAPSDSGPLR	15	0	1501.75	A0A0G2JEG8;A0A668KM31;Q7TQF7	A0A0G2JEG8	242	256	Amph	Amphiphysin	yes	no	2	4.9382e-22	115.18	0	0	0	0	0	0	0	0	0
AFSYYGPLR	9	0	1072.53	A0A3Q4EH04;A0A3Q4L335;A0A3Q4L393;Q8BL97	A0A3Q4EH04	30	38	Srsf7	Serine/arginine-rich splicing factor 7	yes	no	2	0.018074	77.741	9976100	9976100	0	0	0	9976100	0	0	0
AFVHWYVGEGMEEGEFSEAR	20	0	2329.01	P05213;A0A0A0MQA5;P68368;P68369;P05214	P68369	403	422	Tuba1b;Tuba4a;Tuba1a;Tuba3a	Tubulin alpha-1B chain;Tubulin alpha-4A chain;Tubulin alpha-1A chain;Tubulin alpha-3 chain	no	no	2;3	1.2887e-06	103.5	4297600000	0	0	2035800000	2261700000	0	0	974870000	1118400000
AFVHWYVGEGMEEGEFSEAREDMAALEK	28	1	3216.42	P05213;A0A0A0MQA5;P68368;P68369	P68369	403	430	Tuba1b;Tuba4a;Tuba1a	Tubulin alpha-1B chain;Tubulin alpha-4A chain;Tubulin alpha-1A chain	no	no	3;4	9.9012e-13	84.107	569060000	0	0	248380000	320690000	0	0	118940000	158580000
AFVRPSGTEDIVR	13	1	1445.76	Q8BWW3;Q9CYR6	Q8BWW3	452	464	Pgm3	Phosphoacetylglucosamine mutase	yes	no	3	0.00084881	63.76	6255100	0	6255100	0	0	0	5843200	0	0
AGAESDGQFQFTGIK	15	0	1554.73	Q78IK2	Q78IK2	2	16	Usmg5	Up-regulated during skeletal muscle growth protein 5	yes	yes	2	0.0030223	55.314	90241000	0	46412000	0	43829000	0	43357000	0	21673000
AGAGGGGGAVGPQPSAKPR	19	1	1590.82	Q9CXS4	Q9CXS4	40	58	Cenpv	Centromere protein V	yes	yes	2	0.0093652	36.847	18592000	0	0	18592000	0	0	0	8902700	0
AGAGSATLSMAYAGAR	16	0	1453.7	P08249	P08249	242	257	Mdh2	Malate dehydrogenase, mitochondrial	yes	yes	2	0.00060968	89.548	410890000	165100000	195460000	0	50339000	165100000	182590000	0	24893000
AGAIAPCEVTVPAQNTGLGPEK	22	0	2179.09	P14869;D3YVM5;S4R1N1	P14869	113	134	Rplp0	60S acidic ribosomal protein P0	yes	no	2;3	3.0617e-05	34.444	355260000	0	145740000	108910000	100610000	0	136140000	52153000	49751000
AGDWQCPNPGCGNQNFAWR	19	0	2233.92	Q5SUT0;Q5SUS9;Q61545	Q5SUT0	481	499	Ewsr1	RNA-binding protein EWS	yes	no	2;3	2.8292e-05	94.767	1407100000	54997000	0	592630000	759460000	54997000	0	283790000	375550000
AGEQDASIHLK	11	0	1167.59	P13595;A0A0A6YY91;E9Q589;A0A0A6YWU2;A0A0A6YY47;E9QB01	P13595	294	304	Ncam1	Neural cell adhesion molecule 1	no	no	2;3	0.00068711	64.841	1461300000	157200000	154470000	449140000	700530000	157200000	144300000	215070000	346410000
AGFAGDDAPR	10	0	975.441	P60710;E9Q1F2;E9Q5F4;G3UZ07;E9Q2D1;F6WX90;P63260;G3UYG0;B1ATY1;E9Q606;P68134;P68033;P63268;P62737;A0A1D5RM20;D3Z2K3;A0A494B9T3;D3YZY0	P63260	19	28	Actb;Actg1;Actc1;Acta1;Actg2;Acta2	Actin, cytoplasmic 1;Actin, cytoplasmic 1, N-terminally processed;Actin, cytoplasmic 2;Actin, cytoplasmic 2, N-terminally processed;Actin, alpha skeletal muscle;Actin, alpha cardiac muscle 1;Actin, gamma-enteric smooth muscle;Actin, aortic smooth muscle	no	no	2	0.00023989	121.09	1226700000	280740000	323050000	353610000	269270000	280740000	301780000	169330000	133150000
AGGEGGVTLGQPHLSR	16	0	1534.79	Q9Z0N1;A2AAW9	Q9Z0N1	2	17	Eif2s3x	Eukaryotic translation initiation factor 2 subunit 3, X-linked	yes	no	2	7.6852e-05	88.338	154260000	0	35145000	64375000	54745000	0	32831000	30826000	27071000
AGGIETIANEYSDR	14	0	1494.7	Q3U2G2;Q61316	Q3U2G2	20	33	Hspa4	Heat shock 70 kDa protein 4	yes	no	2	0.0071779	49.5	64137000	31032000	33105000	0	0	31032000	30925000	0	0
AGGSAAPTQPK	11	0	983.504	Q80ZM5	Q80ZM5	24	34	H1fx		yes	yes	2	0.0014316	85.67	19387000	7200800	12186000	0	0	7200800	11384000	0	0
AGHFDKEIVPVLVSSR	16	1	1752.95	Q8CAY6;G3XA25;Q80X81	Q8CAY6	195	210	Acat2;Acat3	Acetyl-CoA acetyltransferase, cytosolic	yes	no	3;4	0.00047408	52.372	78617000	27367000	51249000	0	0	27367000	47875000	0	0
AGHLTSVHSPEEHK	14	0	1527.74	A0A0R4IZX5;P55066	A0A0R4IZX5	1072	1085	Ncan	Neurocan core protein	yes	no	2	0.0017246	73.067	55003000	0	0	23743000	31260000	0	0	11370000	15458000
AGIFQSAK	8	0	820.444	Q9CPQ1;A0A0G2JDA6	Q9CPQ1	69	76	Cox6c	Cytochrome c oxidase subunit 6C	yes	no	2	0.039395	75.109	72620000	0	0	72620000	0	0	0	34775000	0
AGKFPSLLTHNENMVAK	17	1	1855.96	A0A3B2WDD2;A0A3B2WBL1;Q5XJF6;A0A3B2W824;P53026	A0A3B2WDD2	104	120	Rpl10a	Ribosomal protein;60S ribosomal protein L10a	yes	no	3	0.013704	33.947	21961000	0	21961000	0	0	0	20515000	0	0
AGKPVICATQMLESMIK	17	1	1875.96	P52480	P52480	320	336	Pkm	Pyruvate kinase PKM	yes	yes	3	0.001369	50.077	159970000	0	0	94724000	65245000	0	0	45359000	32264000
AGLAFMLHCVAEGHPTPR	18	0	1962.96	E9Q9N7;Q5RKR3	E9Q9N7	296	313	Islr2	Immunoglobulin superfamily containing leucine-rich repeat protein 2	yes	no	4	0.0073196	31.876	2032800	0	2032800	0	0	0	1898900	0	0
AGLQFPVGR	9	0	943.524	A0A0N4SV66;C0HKE9;C0HKE8;C0HKE7;C0HKE6;C0HKE5;C0HKE4;C0HKE3;C0HKE2;C0HKE1;Q8CGP6;Q8R1M2;Q8CGP7;Q8CGP5;Q8BFU2;Q8CGP4;P27661;G3UWL7;Q64522;Q3THW5;P0C0S6;Q3UA95;Q64523;Q6GSS7	A0A0N4SV66	22	30	Hist1h2ah;H2afj;Hist1h2ak;Hist1h2af;Hist3h2a;Hist1h2aa;H2afx;H2afz;Hist2h2ab;H2afv;Hist2h2ac;Hist2h2aa1	Histone H2A type 1-H;Histone H2A.J;Histone H2A type 1-K;Histone H2A type 1-F;Histone H2A type 3;Histone H2A;Histone H2AX;Histone H2A type 2-B;Histone H2A.V;Histone H2A.Z;Histone H2A type 2-C;Histone H2A type 2-A	no	no	1;2	0.0016182	119.89	5814600000	879230000	686390000	2020700000	2228300000	879230000	641200000	967640000	1101900000
AGNLGGGVVTIER	13	0	1241.67	P67984	P67984	53	65	Rpl22	60S ribosomal protein L22	yes	yes	2	0.00046772	92.611	1037800000	190240000	192180000	335510000	319880000	190240000	179530000	160660000	158180000
AGPIWDLR	8	0	926.497	G3UZI2;A0A0R4J259;G3V018;Q7TMK9;G3UXJ6;G3UZ48;G3UWM1;Q8VHM5;A2AW41;F7B5B5	G3UZI2	185	192	Syncrip;Hnrnpr	Heterogeneous nuclear ribonucleoprotein Q	no	no	2	0.01861	101.64	296330000	0	49243000	137500000	109590000	0	46001000	65842000	54192000
AGPNIYELR	9	0	1031.54	O55125	O55125	180	188	Nipsnap1	Protein NipSnap homolog 1	yes	yes	2	0.011182	68.383	15857000	0	15857000	0	0	0	14813000	0	0
AGQAVDDFIEK	11	0	1191.58	Q9DCD0	Q9DCD0	77	87	Pgd	6-phosphogluconate dehydrogenase, decarboxylating	yes	yes	2	0.0036279	68.657	56016000	25898000	30118000	0	0	25898000	28135000	0	0
AGTVVLDDVELR	12	0	1285.69	P25206	P25206	2	13	Mcm3	DNA replication licensing factor MCM3	yes	yes	2	0.0023798	49.418	5674200	5674200	0	0	0	5674200	0	0	0
AGVLAGHDNR	10	0	1008.51	P62874;P62880;E9QKR0;D3YZX3;E9PWM7	P62880	305	314	Gnb1;Gnb2	Guanine nucleotide-binding protein G(I)/G(S)/G(T) subunit beta-1;Guanine nucleotide-binding protein G(I)/G(S)/G(T) subunit beta-2	no	no	2;3	0.00025794	129.47	559000000	19431000	39653000	236110000	263800000	19431000	37042000	113070000	130450000
AGVNTVTTLVENK	13	0	1344.72	P12970	P12970	138	150	Rpl7a	60S ribosomal protein L7a	yes	yes	2	0.023112	42.001	315260000	0	112400000	0	202860000	0	105000000	0	100310000
AGVNTVTTLVENKK	14	1	1472.82	P12970	P12970	138	151	Rpl7a	60S ribosomal protein L7a	yes	yes	3	0.017968	31.389	9774400	0	9774400	0	0	0	9130800	0	0
AGVTTEEIDHAVHLACIAR	19	0	2062.03	Q8BP48	Q8BP48	159	177	Metap1	Methionine aminopeptidase 1	yes	yes	4	6.5536e-06	79.311	20943000	9109600	11833000	0	0	9109600	11054000	0	0
AHCIQQMTSK	10	0	1202.55	A0A338P6R8;A0A338P769;B7ZNM7;Q9Z2Q6	A0A338P6R8	318	327	Sept5	Septin-5	yes	no	2	0.037729	51.113	32715000	15037000	17678000	0	0	15037000	16514000	0	0
AHEAQDAGYR	10	0	1116.49	E0CZ78;P48453;E9Q6P2;G3X8U7;A0A2I3BPC5;P48455;P63328	E0CZ78	289	298	Ppp3cb;Ppp3cc;Ppp3ca	Serine/threonine-protein phosphatase;Serine/threonine-protein phosphatase 2B catalytic subunit beta isoform;Serine/threonine-protein phosphatase 2B catalytic subunit gamma isoform;Serine/threonine-protein phosphatase 2B catalytic subunit alpha isoform	no	no	2	0.022491	60.91	4946700	0	4946700	0	0	0	4621000	0	0
AHEILPELVCCSAK	14	0	1625.79	P42932;H3BLL1;H3BKG2	P42932	139	152	Cct8	T-complex protein 1 subunit theta	yes	no	3	0.00052022	66.533	15149000	7642000	7506500	0	0	7642000	7012300	0	0
AHGGYSVFAGVGER	14	0	1405.67	P56480	P56480	226	239	Atp5b	ATP synthase subunit beta, mitochondrial	yes	yes	2;3	2.9153e-09	101.39	415430000	105940000	80764000	117120000	111610000	105940000	75447000	56083000	55190000
AHIAQLCEK	9	0	1068.54	Q5SXR6;Q68FD5	Q5SXR6	615	623	Cltc	Clathrin heavy chain;Clathrin heavy chain 1	yes	no	2	0.0056189	101.54	28426000	14326000	14100000	0	0	14326000	13171000	0	0
AHLGTALK	8	0	809.476	P62267	P62267	30	37	Rps23	40S ribosomal protein S23	yes	yes	2	0.029902	94.662	55186000	55186000	0	0	0	55186000	0	0	0
AHPNLPILIR	10	0	1142.69	Q9CQ75	Q9CQ75	47	56	Ndufa2	NADH dehydrogenase [ubiquinone] 1 alpha subcomplex subunit 2	yes	yes	3	0.0065697	64.04	9300600	4577800	4722800	0	0	4577800	4411800	0	0
AHQCGDDDKTRPLVK	15	2	1738.84	Q9D735	Q9D735	159	173		Uncharacterized protein C19orf43 homolog	yes	yes	3	0.0029007	64.394	19435000	0	0	19435000	0	0	0	9306800	0
AHQLVMEGYNWCHDR	15	0	1914.83	P62715;P63330	P63330	240	254	Ppp2cb;Ppp2ca	Serine/threonine-protein phosphatase 2A catalytic subunit beta isoform;Serine/threonine-protein phosphatase 2A catalytic subunit alpha isoform	no	no	2;3;4	2.9715e-10	123.02	276300000	9724700	10246000	159420000	96906000	9724700	9571700	76341000	47920000
AHQVVEDGYEFFAK	14	0	1638.77	P62137;A0A0J9YUU8;P62141;P63087;A0A0G2JFF1	P63087	247	260	Ppp1ca;Ppp1cb;Ppp1cc	Serine/threonine-protein phosphatase PP1-alpha catalytic subunit;Serine/threonine-protein phosphatase PP1-beta catalytic subunit;Serine/threonine-protein phosphatase PP1-gamma catalytic subunit	no	no	2;3	0.0032025	57.347	228830000	47270000	67710000	42380000	71474000	47270000	63252000	20294000	35344000
AHSIQIMK	8	0	926.501	A0A1D5RLW5;A0A1D5RM85;P62717;A0A1D5RME4	A0A1D5RLW5	92	99	Rpl18a	60S ribosomal protein L18a	yes	no	2	0.037652	89.296	38056000	16771000	21285000	0	0	16771000	19884000	0	0
AHSSMVGVNLPQK	13	0	1366.7	P09411;S4R2M7	P09411	172	184	Pgk1	Phosphoglycerate kinase 1;Phosphoglycerate kinase	yes	no	3	0.018734	29.071	9065200	0	9065200	0	0	0	8468400	0	0
AHVLAASVEQATQNFLEK	18	0	1955.01	E0CXB9;Q61301;Q8BS72	E0CXB9	70	87	Ctnna2	Catenin alpha-2	yes	no	3	1.4723e-05	64.52	65306000	0	0	24229000	41077000	0	0	11602000	20313000
AIAELGIYPAVDPLDSTSR	19	0	1987.03	P56480	P56480	388	406	Atp5b	ATP synthase subunit beta, mitochondrial	yes	yes	2;3	1.4876e-05	61.641	480850000	11918000	0	255140000	213790000	11918000	0	122180000	105720000
AIAGTGANVIVTGGK	15	0	1327.75	P42932;H3BL49;H3BJB6	P42932	282	296	Cct8	T-complex protein 1 subunit theta	yes	no	2	2.8801e-06	119.76	433560000	0	0	214670000	218890000	0	0	102800000	108240000
AIANECQANFISIK	14	0	1577.79	Q01853	Q01853	530	543	Vcp	Transitional endoplasmic reticulum ATPase	yes	yes	2	0.0012393	99.283	265250000	0	0	159280000	105970000	0	0	76273000	52404000
AIDLFTDAIK	10	0	1105.6	F8WJK8;Q99L47;E9Q1V0	F8WJK8	123	132	St13	Hsc70-interacting protein	yes	no	2	0.0048692	85.676	31178000	0	0	31178000	0	0	0	14930000	0
AIEALKEFNEDGALAVLQQFK	21	1	2333.23	G3UZI2;A0A0R4J259;G3V018;Q7TMK9;G3UXJ6;G3UWM1;G3XA76	G3UZI2	61	81	Syncrip	Heterogeneous nuclear ribonucleoprotein Q	yes	no	2;3	2.285e-18	125.12	380350000	0	0	198730000	181620000	0	0	95163000	89812000
AIEPPPLDAVIEAEHTLR	18	0	1970.05	A0A087WPL5;E9QNN1	A0A087WPL5	822	839	Dhx9		yes	no	3	6.976e-09	91.475	316310000	51201000	53487000	89448000	122180000	51201000	49966000	42833000	60417000
AIGHVIEEGGVK	12	0	1207.66	A0A5F8MPL6;A0A571BE69;Q9Z1S5;A0A2R8W6V9	A0A5F8MPL6	575	586	Sept3	Neuronal-specific septin-3	yes	no	2;3	1.3589e-05	120.76	268020000	35246000	38269000	141010000	53491000	35246000	35750000	67524000	26451000
AIGNIELGIR	10	0	1054.61	P14873	P14873	55	64	Map1b	Microtubule-associated protein 1B;MAP1B heavy chain;MAP1 light chain LC1	yes	yes	2	1.6603e-08	136.27	123200000	28082000	34860000	41180000	19073000	28082000	32565000	19719000	9431400
AIGSASEGAQSSLQEVYHK	19	0	1960.95	Q9Z2U1	Q9Z2U1	169	187	Psma5	Proteasome subunit alpha type-5	yes	yes	2;3	3.3605e-06	81.692	657220000	0	0	397560000	259660000	0	0	190380000	128400000
AIHSWLTR	8	0	982.535	P99026	P99026	132	139	Psmb4	Proteasome subunit beta type-4	yes	yes	3	0.013631	67.993	32505000	0	0	0	32505000	0	0	0	16074000
AIIDGTESVSR	11	0	1146.59	B2RXS8;A0A0J9YVD2;B9EKR1	B2RXS8	195	205	Ptprz1	Protein-tyrosine-phosphatase;Receptor-type tyrosine-protein phosphatase zeta	yes	no	2	0.00024319	108.98	92701000	0	0	39706000	52995000	0	0	19014000	26206000
AIIIFVPVPQLK	12	0	1336.85	P62082	P62082	59	70	Rps7	40S ribosomal protein S7	yes	yes	2	0.00080781	83.005	568420000	0	0	272240000	296180000	0	0	130360000	146460000
AILTPNHVEFSR	12	0	1382.73	J3QN06;J3QMM7;K3W4M4;Q9CZ42	J3QN06	181	192	Carkd	ATP-dependent (S)-NAD(P)H-hydrate dehydratase	yes	no	2	0.02798	43.083	32086000	0	0	17434000	14651000	0	0	8348600	7245000
AILVDLEPGTMDSVR	15	0	1614.83	Q9ERD7;A0A1D5RM76;P99024;Q7TMM9;Q9CWF2	P99024	63	77	Tubb3;Tubb5;Tubb2a;Tubb2b	Tubulin beta-3 chain;Tubulin beta-5 chain;Tubulin beta-2A chain;Tubulin beta-2B chain	no	no	2;3	2.8801e-06	119.76	30076000000	4613200000	4644300000	10032000000	10787000000	4613200000	4338600000	4803800000	5334000000
AINQGGLTSVAVR	13	0	1284.71	Q9QUM9;E0CXB1	Q9QUM9	31	43	Psma6	Proteasome subunit alpha type-6	yes	no	2	2.7999e-05	117.67	270330000	0	0	270330000	0	0	0	129450000	0
AISGVHTVR	9	0	938.53	Q9Z0N1;A2AAW9;Q9Z0N2	Q9Z0N1	60	68	Eif2s3x;Eif2s3y	Eukaryotic translation initiation factor 2 subunit 3, X-linked;Eukaryotic translation initiation factor 2 subunit 3, Y-linked	yes	no	3	0.012553	64.654	12458000	0	12458000	0	0	0	11637000	0	0
AISHEHSPSDLEAHFVPLVK	20	0	2212.13	Q76MZ3	Q76MZ3	114	133	Ppp2r1a	Serine/threonine-protein phosphatase 2A 65 kDa regulatory subunit A alpha isoform	yes	yes	3;4;5	1.6716e-07	111.33	474950000	0	0	264920000	210030000	0	0	126860000	103860000
AISSSAISR	9	0	890.482	H3BJ30;H3BJW3;Q6NVF9;H3BKW0	H3BJ30	423	431	Cpsf6	Cleavage and polyadenylation specificity factor subunit 6	yes	no	2	0.01154	91.853	274710000	0	0	0	274710000	0	0	0	135840000
AITGASLADIMAK	13	0	1260.67	Q8BP67	Q8BP67	81	93	Rpl24	60S ribosomal protein L24	yes	yes	2	4.4872e-05	114.89	1706000000	156880000	178720000	681110000	689290000	156880000	166950000	326160000	340850000
AITHLNNNFMFGQK	14	0	1633.8	G5E924;Q8R081;G3UY38	G5E924	461	474	Hnrnpl	Heterogeneous nuclear ribonucleoprotein L	yes	no	2;3	0.00025163	89.43	411460000	135920000	65264000	150070000	60213000	135920000	60967000	71861000	29775000
AITIAGVPQSVTECVK	16	0	1671.89	P60335	P60335	145	160	Pcbp1	Poly(rC)-binding protein 1	yes	yes	2	0.0013256	59.542	548600000	109930000	110950000	327710000	0	109930000	103640000	156930000	0
AITVASQTNCPLYVTK	16	0	1764.91	Q3TT92;E9PWE8;Q62188	Q3TT92	237	252	Dpysl3	Dihydropyrimidinase-related protein 3	yes	no	2	0.00088703	68.536	823960000	0	261830000	562130000	0	0	244590000	269180000	0
AITVFSPDGHLFQVEYAQEAVKK	23	1	2576.33	Q9Z2U0;A0A338P7D7;Q9CWH6;B7ZMS4;A0A3Q4L361;A0A3Q4EHS3;A0A3Q4EG42	Q9Z2U0	6	28	Psma7;Psma8	Proteasome subunit alpha type-7;Proteasome subunit alpha type-7-like;Proteasome subunit alpha type	yes	no	4	0.0015903	33.79	291330000	0	0	162530000	128800000	0	0	77828000	63693000
AIVAGDQNVEYK	12	0	1305.66	A2AEX8;A2AEX6;P97447;A2AEY1;A2AEY2;A2AEX7	A2AEX8	123	134	Fhl1	Four and a half LIM domains protein 1	yes	no	2	0.0026292	61.56	110700000	0	0	0	110700000	0	0	0	54742000
AIVAIENPADVSVISSR	17	0	1739.94	P14206;A0A1L1SUK3	P14206	64	80	Rpsa	40S ribosomal protein SA	yes	no	2;3	1.7418e-06	113.65	1237900000	0	126940000	542750000	568180000	0	118580000	259900000	280970000
AIVDCGFEHPSEVQHECIPQAILGMDVLCQAK	32	0	3650.7	Q9Z1N5;Q8VDW0;D6RHT5	Q9Z1N5	59	90	Ddx39b;Ddx39a;Ddx39	Spliceosome RNA helicase Ddx39b;ATP-dependent RNA helicase DDX39A	yes	no	4	0.00076997	29.859	150930000	0	0	65010000	85917000	0	0	31130000	42486000
AIVQDQGCLPGLILFMDHPNPPVVHSALLALR	32	0	3490.86	Q9D7A8	Q9D7A8	33	64	Armc1	Armadillo repeat-containing protein 1	yes	yes	5	0.037343	10.943	13136000	0	0	13136000	0	0	0	6290400	0
AIVWGMQTR	9	0	1060.55	Q3V117;Q91V92	Q3V117	499	507	Acly	ATP-citrate synthase	yes	no	2	0.011023	93.374	19959000	9721900	10237000	0	0	9721900	9563200	0	0
AKEFTNVYIK	10	1	1211.65	P29341;Q9D4E6;Q91YZ8;A3KFU5;A3KFU8;Q6PHQ9	P29341	187	196	Pabpc1;Pabpc6;Pabpc4	Polyadenylate-binding protein 1;Polyadenylate-binding protein	yes	no	2	0.0097393	78.264	58507000	0	0	58507000	0	0	0	28016000	0
AKFEELNMDLFR	12	1	1511.74	P20029	P20029	326	337	Hspa5	78 kDa glucose-regulated protein	yes	yes	2;3	0.0062789	51.092	218270000	5547500	0	101170000	111550000	5547500	0	48444000	55163000
AKKPAAAAVTK	11	2	1054.65	P15864	P15864	158	168	Hist1h1c	Histone H1.2	yes	yes	3	0.010012	53.448	10767000	0	10767000	0	0	0	10058000	0	0
AKTDHGAEIVYK	12	1	1330.69	B1AQW2	B1AQW2	333	344	Mapt	Microtubule-associated protein	no	no	2;3;4	0.00093777	86.014	540310000	0	234350000	69295000	236670000	0	218920000	33183000	117030000
AKVEFNIR	8	1	975.55	Q9CY58;Q3UMP4;A0A0N4SV32	Q9CY58	301	308	Serbp1	Plasminogen activator inhibitor 1 RNA-binding protein	yes	no	2;3	0.021044	104.21	92835000	0	0	92835000	0	0	0	44455000	0
ALAAAGYDVEK	11	0	1106.56	P43274;I7HFT9;Q07133;P15864;P43277	P43274	65	75	Hist1h1e;Hist1h1t;Hist1h1c;Hist1h1d	Histone H1.4;Histone H1t;Histone H1.2;Histone H1.3	no	no	2	0.0010347	93.111	2176800000	334840000	0	923730000	918280000	334840000	0	442340000	454090000
ALAAAGYDVEKNNSR	15	1	1577.78	P43274;I7HFT9;Q07133;P15864;P43277	P43274	65	79	Hist1h1e;Hist1h1t;Hist1h1c;Hist1h1d	Histone H1.4;Histone H1t;Histone H1.2;Histone H1.3	no	no	2;3	4.7826e-16	115.91	209540000	0	0	115820000	93726000	0	0	55460000	46347000
ALAAGGVGSIVR	12	0	1069.62	Q9CPW4;Q3UA72	Q9CPW4	132	143	Arpc5	Actin-related protein 2/3 complex subunit 5	yes	no	2	0.00069321	106.2	47224000	18585000	0	28639000	0	18585000	0	13714000	0
ALAAGGYDVEK	11	0	1092.55	P43276	P43276	65	75	Hist1h1b	Histone H1.5	yes	yes	2	0.0017528	93.111	311930000	0	113360000	95101000	103470000	0	105900000	45540000	51167000
ALAAGGYDVEKNNSR	15	1	1563.76	P43276	P43276	65	79	Hist1h1b	Histone H1.5	yes	yes	3	5.4225e-05	61.641	0	0	0	0	0	0	0	0	0
ALANSLACQGK	11	0	1131.57	A6ZI44;P05064;Q9CPQ9;A6ZI46	A6ZI44	386	396	Aldoa;Aldoart1	Fructose-bisphosphate aldolase;Fructose-bisphosphate aldolase A	yes	no	2	8.1086e-12	135	574570000	81048000	98514000	216630000	178380000	81048000	92028000	103740000	88207000
ALASEWKPEIR	11	1	1298.7	P13595;A0A0A6YY91;E9Q589;A0A0A6YY47	P13595	641	651	Ncam1	Neural cell adhesion molecule 1	no	no	2;3	1.1466e-07	129.38	471950000	101160000	90184000	135400000	145210000	101160000	84247000	64836000	71807000
ALASLMTYK	9	0	996.531	P26443	P26443	163	171	Glud1	Glutamate dehydrogenase 1, mitochondrial	yes	yes	2	0.018983	70.919	0	0	0	0	0	0	0	0	0
ALAVGGLGSIIR	12	0	1125.69	Q9D898	Q9D898	134	145	Arpc5l	Actin-related protein 2/3 complex subunit 5-like protein	yes	yes	2	6.468e-14	127.4	15609000	0	0	0	15609000	0	0	0	7718600
ALDDFVLGSAR	11	0	1162.6	Q9JIG8	Q9JIG8	11	21	Praf2	PRA1 family protein 2	yes	yes	2	0.00318	70.028	21091000	10015000	11075000	0	0	10015000	10346000	0	0
ALDEGDIALLK	11	0	1156.63	Q8BVQ9;P46471	Q8BVQ9	66	76	Psmc2	26S protease regulatory subunit 7	yes	no	2	0.023245	49.715	28582000	18798000	9783800	0	0	18798000	9139700	0	0
ALDEYYDKHFTEFVPLR	17	1	2142.04	P50516	P50516	460	476	Atp6v1a	V-type proton ATPase catalytic subunit A	yes	yes	3;4	0.00014753	105.31	215210000	0	0	78997000	136220000	0	0	37828000	67359000
ALDIDLDKPLADSEKLPVQK	20	2	2207.2	O54774	O54774	797	816	Ap3d1	AP-3 complex subunit delta-1	yes	yes	4	3.5436e-06	88.565	93067000	0	0	54818000	38249000	0	0	26250000	18914000
ALDLDSSCK	9	0	1007.46	Q60864	Q60864	454	462	Stip1	Stress-induced-phosphoprotein 1	yes	yes	2	0.040555	72.485	9862200	0	9862200	0	0	0	9212800	0	0
ALDTMNFDVIK	11	0	1265.63	P29341;Q9D4E6;Q62029;A0A2I3BR37	P29341	68	78	Pabpc1;Pabpc6;Pabpc2	Polyadenylate-binding protein 1;Polyadenylate-binding protein	yes	no	2	0.012402	56.729	144400000	0	0	66960000	77443000	0	0	32064000	38295000
ALDYCHSMGIMHR	13	0	1589.69	Q60737;A2ANR6	Q60737	143	155	Csnk2a1	Casein kinase II subunit alpha	yes	no	4	0.010443	36.284	5833400	5833400	0	0	0	5833400	0	0	0
ALEAELAALR	10	0	1055.6	P46660	P46660	121	130	Ina	Alpha-internexin	yes	yes	2	0.0014825	103.56	12048000	5748000	6299800	0	0	5748000	5885000	0	0
ALEENNNFSK	10	0	1164.54	P55821	P55821	120	129	Stmn2	Stathmin-2	yes	yes	2	0.0015667	106.42	475990000	187260000	288740000	0	0	187260000	269730000	0	0
ALEHFTDLYDIK	12	0	1463.73	Q5SXR6;Q68FD5	Q5SXR6	630	641	Cltc	Clathrin heavy chain;Clathrin heavy chain 1	yes	no	3	0.0014486	61.375	12326000	0	12326000	0	0	0	11514000	0	0
ALEHSALAINHK	12	0	1302.7	P70698	P70698	320	331	Ctps1	CTP synthase 1	no	no	3	0.009599	31.478	20242000	10634000	9607100	0	0	10634000	8974500	0	0
ALELTGLK	8	0	843.507	P09405	P09405	365	372	Ncl	Nucleolin	yes	yes	2	0.037892	79.469	42986000	0	0	42986000	0	0	0	20584000	0
ALEQFLQEYFDGNLKR	16	1	1969.99	P27773	P27773	348	363	Pdia3	Protein disulfide-isomerase A3	yes	yes	3	0.00054645	75.574	556380000	0	0	243660000	312720000	0	0	116680000	154640000
ALEQLNGFELAGR	13	0	1416.74	Q8VH51;E9Q8F0;F7AA45	Q8VH51	307	319	Rbm39	RNA-binding protein 39	yes	no	2	0.0040625	73.499	76504000	0	0	35336000	41167000	0	0	16921000	20357000
ALEQLNGFELAGRPMK	16	1	1772.92	Q8VH51;E9Q8F0;F7AA45	Q8VH51	307	322	Rbm39	RNA-binding protein 39	yes	no	3	0.00069312	92.063	115170000	0	0	41641000	73532000	0	0	19940000	36362000
ALEQQMESHR	10	0	1227.57	P28738	P28738	701	710	Kif5c	Kinesin heavy chain isoform 5C	yes	yes	2	0.0043745	90.657	13496000	13496000	0	0	0	13496000	0	0	0
ALESPERPFLAILGGAK	17	1	1767.99	P09411;S4R2M7	P09411	200	216	Pgk1	Phosphoglycerate kinase 1;Phosphoglycerate kinase	yes	no	2;3	0.00033305	45.723	96449000	13977000	82471000	0	0	13977000	77041000	0	0
ALFDHLTAR	9	0	1042.56	Q9CRY7	Q9CRY7	263	271	Gdpd1	Glycerophosphodiester phosphodiesterase domain-containing protein 1	yes	yes	3	0.025394	42.395	26351000	13826000	12525000	0	0	13826000	11700000	0	0
ALGFPLERPK	10	1	1126.65	Q9CZU6;Q80X68	Q9CZU6	441	450	Cs;Csl	Citrate synthase, mitochondrial;Citrate synthase	yes	no	2;3	0.008186	69.423	65935000	37439000	0	0	28496000	37439000	0	0	14091000
ALGSDHCPITLYLAL	15	0	1642.84	P28352;F6QA74	P28352	303	317	Apex1	DNA-(apurinic or apyrimidinic site) lyase;DNA-(apurinic or apyrimidinic site) lyase, mitochondrial	yes	no	2	0.018044	38.567	67310000	0	0	33816000	33494000	0	0	16193000	16563000
ALGVGFATR	9	0	890.497	E9Q0H6;P51880	E9Q0H6	23	31	Fabp7	Fatty acid-binding protein, brain	yes	no	2	0.0056189	101.54	97605000	51383000	46222000	0	0	51383000	43179000	0	0
ALGVLAQLIWSR	12	0	1325.78	Q9CZU6	Q9CZU6	429	440	Cs	Citrate synthase, mitochondrial	yes	yes	2	9.8444e-08	125.97	128500000	0	0	68177000	60320000	0	0	32647000	29828000
ALHGEQYLELYKPLPR	16	1	1926.04	P51660	P51660	403	418	Hsd17b4	Peroxisomal multifunctional enzyme type 2;(3R)-hydroxyacyl-CoA dehydrogenase;Enoyl-CoA hydratase 2	yes	yes	4	0.0046872	35.836	15795000	0	15795000	0	0	0	14755000	0	0
ALHHGIDLEK	10	0	1131.6	Q922B2	Q922B2	442	451	Dars	Aspartate--tRNA ligase, cytoplasmic	yes	yes	3	0.034745	39.148	28423000	0	28423000	0	0	0	26552000	0	0
ALHNADCQK	9	0	1055.48	P63089;Q3UZI5	P63089	125	133	Ptn	Pleiotrophin	yes	no	2;3	0.0014173	101.28	32302000	0	0	16438000	15864000	0	0	7871300	7844800
ALHSLLLR	8	0	921.576	D3Z7E6;Q61205	D3Z7E6	156	163	Pafah1b3	Platelet-activating factor acetylhydrolase IB subunit gamma	yes	no	2;3	0.0089235	86.794	35334000	17795000	17538000	0	0	17795000	16384000	0	0
ALIAAQYSGAQVR	13	0	1346.73	Q9D8N0	Q9D8N0	18	30	Eef1g	Elongation factor 1-gamma	yes	yes	3	0.01681	35.594	9802800	9802800	0	0	0	9802800	0	0	0
ALIAGGGAPEIELALR	16	0	1549.88	P80315;G5E839	P80315	420	435	Cct4	T-complex protein 1 subunit delta	yes	no	2	0.0016723	61.353	796760000	0	0	312290000	484480000	0	0	149540000	239570000
ALIVVPYAEGVIPDETK	17	0	1812.99	D3Z4B0;Q3UIX4;F6RDI8;E9Q6E5	D3Z4B0	97	113	Srsf11		yes	no	2	0.0034413	44.765	16885000	0	0	0	16885000	0	0	0	8349500
ALKEPPRDR	9	2	1080.6	P35979	P35979	84	92	Rpl12	60S ribosomal protein L12	yes	yes	3	0.020373	84.213	60217000	0	0	36321000	23896000	0	0	17393000	11816000
ALLATASQCQQPAGNK	16	0	1656.83	P40124;B1ARS0	P40124	84	99	Cap1	Adenylyl cyclase-associated protein 1;Adenylyl cyclase-associated protein	yes	no	2	0.00048686	105.98	102650000	0	0	51264000	51381000	0	0	24548000	25408000
ALLDTLQLGPDALTVHLIHEVTK	23	0	2496.4	Q8BHN3	Q8BHN3	62	84	Ganab	Neutral alpha-glucosidase AB	yes	yes	3;4	2.595e-08	92.01	180270000	0	0	0	180270000	0	0	0	89142000
ALLELQLEPEELYQTFQR	18	0	2219.15	P58252	P58252	163	180	Eef2	Elongation factor 2	yes	yes	2;3	1.5812e-05	62.94	122520000	0	0	75001000	47520000	0	0	35915000	23499000
ALLEVVQSGGK	11	0	1099.62	Q9Z2U0;A0A338P7D7;Q9CWH6	Q9Z2U0	194	204	Psma7;Psma8	Proteasome subunit alpha type-7;Proteasome subunit alpha type-7-like	yes	no	2	2.5908e-05	120.12	56721000	0	9539800	25923000	21258000	0	8911700	12413000	10512000
ALLFVPR	7	0	814.507	P07901	P07901	340	346	Hsp90aa1	Heat shock protein HSP 90-alpha	yes	yes	2	0.02812	114.67	87216000	87216000	0	0	0	87216000	0	0	0
ALLLPGHHLVTVMLSGIK	18	0	1898.12	Q78PY7;Q3TJ56	Q78PY7	210	227	Snd1	Staphylococcal nuclease domain-containing protein 1	yes	no	3	9.6072e-05	50.387	0	0	0	0	0	0	0	0	0
ALLQEMPLTALLR	13	0	1467.85	O08848	O08848	271	283	Trove2	60 kDa SS-A/Ro ribonucleoprotein	yes	yes	2	0.0016203	68.657	33678000	0	0	16791000	16887000	0	0	8040400	8350500
ALLQSSASR	9	0	931.509	P50580	P50580	356	364	Pa2g4	Proliferation-associated protein 2G4	yes	yes	2	0.027966	69.825	30443000	30443000	0	0	0	30443000	0	0	0
ALMGSPQLVAAVVR	14	0	1410.8	Q02257	Q02257	178	191	Jup	Junction plakoglobin	yes	yes	2	0.010796	44.318	55023000	25363000	29660000	0	0	25363000	27708000	0	0
ALNPLEDWLR	10	0	1225.65	G3UY93;Q9Z1Q9;G3UYW2;G3UZ22	G3UY93	138	147	Vars	Valine--tRNA ligase	yes	no	2	0.030302	57.59	6969100	6969100	0	0	0	6969100	0	0	0
ALPFWNEEIVPQIK	14	0	1682.9	Q9DBJ1	Q9DBJ1	163	176	Pgam1	Phosphoglycerate mutase 1	yes	yes	2	0.014334	50.353	41575000	0	0	0	41575000	0	0	0	20559000
ALPGHLKPFETLLSQNQGGK	20	1	2134.15	P19157;A0A494B908;A0A494BAW2;P46425;A0A494BAM8	P19157	122	141	Gstp1;Gstp2	Glutathione S-transferase P 1;Glutathione S-transferase P 2	yes	no	4	0.0020132	34.274	22518000	0	22518000	0	0	0	21035000	0	0
ALQASALK	8	0	800.476	A6ZI44;P05064;Q9CPQ9;A6ZI46;A6ZI47	A6ZI44	359	366	Aldoa;Aldoart1;Aldoart2	Fructose-bisphosphate aldolase;Fructose-bisphosphate aldolase A	yes	no	2	0.02956	94.874	54475000	54475000	0	0	0	54475000	0	0	0
ALQDAFLAIDAK	12	0	1274.69	A0A0J9YVG0;Q61074	A0A0J9YVG0	93	104	Ppm1g	Protein phosphatase 1G	yes	no	2	0.0026791	63.408	97829000	0	0	97829000	0	0	0	46846000	0
ALQDEWDAVMLHSFTLR	17	0	2030.99	Q99KP6	Q99KP6	77	93	Prpf19	Pre-mRNA-processing factor 19	yes	yes	3	0.0001445	51.193	0	0	0	0	0	0	0	0	0
ALQFLEQVK	9	0	1074.61	P80317;A0A571BEL9	P80317	130	138	Cct6a	T-complex protein 1 subunit zeta	yes	no	2	0.0049728	109.86	183390000	53945000	0	55277000	74171000	53945000	0	26470000	36678000
ALQGASQIIAEIR	13	0	1368.77	E9PUD2;Q8K1M6;A0A2U3TZ67	E9PUD2	695	707	Dnm1l	Dynamin-1-like protein	yes	no	2	0.0021332	70.977	30000000	0	0	18186000	11814000	0	0	8708700	5842000
ALQGSTGAAGPR	12	0	1084.56	E9PYU8;Q9CUN6	E9PYU8	694	705	Smurf1	E3 ubiquitin-protein ligase SMURF1	yes	no	2	0.0022498	69.423	56289000	0	0	33167000	23121000	0	0	15883000	11433000
ALQVGCLLR	9	0	1028.58	P17426;A0A140LIG7	P17426	936	944	Ap2a1	AP-2 complex subunit alpha-1	yes	no	2	0.0017681	119.57	12425000	4626400	7798800	0	0	4626400	7285400	0	0
ALSDADVQK	9	0	945.477	P50518;A0A0N4SW34	P50518	2	10	Atp6v1e1	V-type proton ATPase subunit E 1	yes	no	2	0.009293	51.346	4177900	0	4177900	0	0	0	3902900	0	0
ALSSQHQAR	9	0	996.51	P20029	P20029	299	307	Hspa5	78 kDa glucose-regulated protein	yes	yes	2;3	0.0064177	87.323	9534200	1761900	0	2676100	5096200	1761900	0	1281500	2520000
ALSVGLVR	8	0	813.507	E9Q5I9;Q9WVJ2;F6PXS6;F6ZQQ3	E9Q5I9	287	294	Psmd13	26S proteasome non-ATPase regulatory subunit 13	yes	no	2	0.038186	78.616	13737000	0	13737000	0	0	0	12832000	0	0
ALTLLDYLLK	10	0	1161.7	Q91W69	Q91W69	77	86	Epn3	Epsin-3	yes	yes	2	0.0043745	90.657	10913000	0	0	5981600	4931400	0	0	2864300	2438600
ALTLPGSSENEYIMK	15	0	1651.81	E9Q1T9;Q9ERK4;F6ZEW4;F7D1H9	E9Q1T9	504	518	Cse1l	Exportin-2	yes	no	2	0.039507	33.229	16174000	16174000	0	0	0	16174000	0	0	0
ALTTQLTDAELAQGR	15	0	1586.83	Q99KE1	Q99KE1	497	511	Me2	NAD-dependent malic enzyme, mitochondrial	yes	yes	2	0.0068305	44.765	12945000	0	12945000	0	0	0	12093000	0	0
ALTVPELTQQMFDAK	15	0	1690.86	Q9ERD7;P68372;Q922F4;Q9D6F9	P68372	283	297	Tubb3;Tubb4b;Tubb6;Tubb4a	Tubulin beta-3 chain;Tubulin beta-4B chain;Tubulin beta-6 chain;Tubulin beta-4A chain	no	no	2;3	6.562e-06	116.55	3569300000	643430000	557180000	0	2368700000	643430000	520500000	0	1171300000
ALTVPELTQQMFDSK	15	0	1706.85	Q7TMM9;Q9CWF2	Q9CWF2	283	297	Tubb2a;Tubb2b	Tubulin beta-2A chain;Tubulin beta-2B chain	no	no	2;3	5.6321e-05	92.866	1700900000	62328000	100200000	111430000	1426900000	62328000	93601000	53361000	705620000
ALTVPELTQQVFDAK	15	0	1658.89	P99024	P99024	283	297	Tubb5	Tubulin beta-5 chain	yes	yes	2;3	1.6947e-25	122.69	4140000000	1093400000	965480000	1019400000	1061800000	1093400000	901920000	488140000	525060000
ALVADSHPESER	12	0	1309.63	Q62261;A0A0A0MQG2	Q62261	1657	1668	Sptbn1	Spectrin beta chain, non-erythrocytic 1	yes	no	2	0.0040382	61.65	12942000	0	12942000	0	0	0	12090000	0	0
ALVAYYQK	8	0	954.517	P14131	P14131	91	98	Rps16	40S ribosomal protein S16	yes	yes	2	0.041984	72.234	90744000	0	0	90744000	0	0	0	43454000	0
ALVDGPCTR	9	0	987.481	Q9CR57	Q9CR57	36	44	Rpl14	60S ribosomal protein L14	yes	yes	2	0.023263	84.498	77410000	16297000	18937000	23392000	18784000	16297000	17690000	11201000	9288700
ALVEFTNSPDCLSK	14	0	1579.76	E9PUW7;A0A2I3BQV5;Q9EPK7	E9PUW7	33	46	Xpo7	Exportin-7	yes	no	2	0.014435	42.743	10258000	10258000	0	0	0	10258000	0	0	0
ALVFQPVTELK	11	0	1243.72	P47857	P47857	717	727	Pfkm	ATP-dependent 6-phosphofructokinase, muscle type	yes	yes	2	0.026896	47.823	50884000	22336000	28549000	0	0	22336000	26669000	0	0
ALVLAQIR	8	0	882.565	Q7TT37	Q7TT37	724	731	Ikbkap	Elongator complex protein 1	yes	yes	2	0.034424	88.734	4335700	0	4335700	0	0	0	4050200	0	0
ALVQGLETGR	10	0	1042.58	F8WHY9;Q8BKV1;E0CXM8;M0QWK4	F8WHY9	226	235	Gpc2	Glypican-2;Secreted glypican-2	yes	no	2	0.016977	66.27	8057400	8057400	0	0	0	8057400	0	0	0
ALVSAQWVAEALK	13	0	1384.77	A0A2R8VHT1;Q99J99;A0A2R8VHE5	A0A2R8VHT1	9	21	Mpst	3-mercaptopyruvate sulfurtransferase	yes	no	2	0.0061257	52.79	76930000	0	0	19721000	57209000	0	0	9443600	28290000
ALVSQLHER	9	0	1051.58	Q3ULD5	Q3ULD5	51	59	Mccc2	Methylcrotonoyl-CoA carboxylase beta chain, mitochondrial	yes	yes	2	0.04051	81.548	3589900	3589900	0	0	0	3589900	0	0	0
ALYEALDLQSAFFK	14	0	1614.83	A0A0G2JEA5;Q920E5;A0A0G2JE82	A0A0G2JEA5	325	338	Fdps	Farnesyl pyrophosphate synthase	yes	no	2	0.00053906	80.763	26007000	0	0	26007000	0	0	0	12454000	0
ALYETELADAR	11	0	1250.61	P14733	P14733	81	91	Lmnb1	Lamin-B1	yes	yes	2	0.00094165	94.692	88614000	88614000	0	0	0	88614000	0	0	0
ALYYLQIHPQELR	13	0	1642.88	Q3U1J4;A0A494BBJ6	Q3U1J4	515	527	Ddb1	DNA damage-binding protein 1	yes	no	2;3	0.00015336	82.85	131730000	0	0	70017000	61716000	0	0	33528000	30518000
AMDTLGVEYGDKER	14	1	1582.73	P18872;D3Z2M7;F7BLT7	P18872	87	100	Gnao1	Guanine nucleotide-binding protein G(o) subunit alpha	yes	no	2;3	0.00057779	100.72	309380000	72715000	78375000	82546000	75745000	72715000	73215000	39528000	37456000
AMEAVAAQGK	10	0	974.486	Q9DBJ1;O70250	Q9DBJ1	242	251	Pgam1;Pgam2	Phosphoglycerate mutase 1;Phosphoglycerate mutase 2	yes	no	2	0.021414	66.351	9258700	0	9258700	0	0	0	8649100	0	0
AMEVDERPTEQYSDIGGLDK	20	1	2252.03	F6Q2E3;A0A087WPH7;A2AGN7;B7ZCF1;O88685	F6Q2E3	160	179	Psmc3	26S protease regulatory subunit 6A	yes	no	3	0.0056059	38.453	0	0	0	0	0	0	0	0	0
AMGIMNSFVNDIFER	15	0	1742.81	Q8CBB6;Q9D2U9;Q8CGP2;Q8CGP1;Q8CGP0;Q6ZWY9;Q64525;Q64524;Q64478;Q64475;P10854;P10853	Q8CBB6	59	73	Hist1h2br;Hist3h2ba;Hist1h2bp;Hist1h2bk;Hist3h2bb;Hist1h2bc;Hist2h2bb;Hist2h2be;Hist1h2bh;Hist1h2bb;Hist1h2bm;Hist1h2bf	Histone H2B;Histone H2B type 3-A;Histone H2B type 1-P;Histone H2B type 1-K;Histone H2B type 3-B;Histone H2B type 1-C/E/G;Histone H2B type 2-B;Histone H2B type 2-E;Histone H2B type 1-H;Histone H2B type 1-B;Histone H2B type 1-M;Histone H2B type 1-F/J/L	yes	no	2;3	2.8815e-35	123.02	5539700000	0	0	2960300000	2579500000	0	0	1417500000	1275500000
AMGKEDFTK	9	1	1025.49	Q9EQF6	Q9EQF6	335	343	Dpysl5	Dihydropyrimidinase-related protein 5	yes	yes	2	0.030715	72.23	5701200	5701200	0	0	0	5701200	0	0	0
AMHQSQTMEGCSSPIVVK	18	0	1988.91	A0A0R4J2B0;V9GX43;S4R2U7;S4R1S7;E9QA47;Q9Z0H4;S4R2S7	A0A0R4J2B0	167	184	Celf2	CUGBP Elav-like family member 2	yes	no	3	0.00065463	27.838	110120000	0	26500000	0	83615000	0	24755000	0	41348000
AMLDQLMGTSR	11	0	1221.58	Q7TNC4	Q7TNC4	9	19	Luc7l2	Putative RNA-binding protein Luc7-like 2	yes	yes	2	0.0012814	88.496	111780000	27098000	0	84677000	0	27098000	0	40549000	0
AMNGESLDGR	10	0	1048.46	O89086;Q8BG13	O89086	66	75	Rbm3	RNA-binding protein 3	yes	no	2	0.00408	93.143	73633000	7948000	7758200	31398000	26529000	7948000	7247400	15035000	13119000
AMQGLTGR	8	0	832.423	Q80XR5;P26369;Q3KQM4	Q80XR5	441	448	U2af2	Splicing factor U2AF 65 kDa subunit	yes	no	2	0.016003	105.39	463290000	0	0	211360000	251940000	0	0	101210000	124580000
AMYLPDTLSPADQLK	15	0	1661.83	Q9Z2I0	Q9Z2I0	419	433	Letm1	LETM1 and EF-hand domain-containing protein 1, mitochondrial	yes	yes	2	0.0065976	45.359	49610000	0	0	0	49610000	0	0	0	24532000
ANAGEESVMNLDK	13	0	1376.62	Q8K2B3	Q8K2B3	486	498	Sdha	Succinate dehydrogenase [ubiquinone] flavoprotein subunit, mitochondrial	yes	yes	2	0.011201	48.004	85894000	0	85894000	0	0	0	80239000	0	0
ANFWYQPSFHGVDLSALR	18	0	2107.03	D3YUP1;Q9WVG6	D3YUP1	311	328	Carm1	Histone-arginine methyltransferase CARM1	yes	no	3	0.0038525	29.687	24805000	0	0	24805000	0	0	0	11878000	0
ANKLDHVVTIIK	12	1	1349.8	A0A171KXD3;Q9JIF0;A0A140LJ70;A0A140LHS4;A0A140LI33	A0A171KXD3	79	90	Prmt1	Protein arginine N-methyltransferase 1	yes	no	2	0.01564	51.762	169890000	0	0	169890000	0	0	0	81355000	0
ANLSLLR	7	0	785.476	Q8VIJ6	Q8VIJ6	272	278	Sfpq	Splicing factor, proline- and glutamine-rich	yes	yes	2	0.0018985	148.28	361810000	90998000	96606000	94365000	79838000	90998000	90245000	45187000	39480000
ANLVLLSGANEGR	13	0	1312.71	A6PWC3;A2A9Q2;Q8BHG1;Q3V3G9	A6PWC3	574	586	Nrd1	Nardilysin	yes	no	2	0.0045083	55.401	37324000	20056000	17267000	0	0	20056000	16131000	0	0
ANNVDYTVHSVR	12	0	1373.67	Q64514;Q05DJ9;A0A087WRC0	Q64514	468	479	Tpp2	Tripeptidyl-peptidase 2	yes	no	2	0.0031834	74.162	29197000	0	0	29197000	0	0	0	13981000	0
ANPFGGASHAK	11	0	1055.51	P62267	P62267	38	48	Rps23	40S ribosomal protein S23	yes	yes	2	0.0059514	62.869	293750000	25077000	0	126300000	142370000	25077000	0	60479000	70404000
ANTFVAELK	9	0	991.534	P08249;A0A0G2JF23	P08249	177	185	Mdh2	Malate dehydrogenase, mitochondrial	yes	no	2	0.015826	80.165	90687000	0	0	43312000	47375000	0	0	20740000	23427000
APAMFNIR	8	0	918.475	P97351	P97351	35	42	Rps3a	40S ribosomal protein S3a	yes	yes	2	0.00072203	129.96	181690000	39636000	50558000	39301000	52199000	39636000	47229000	18820000	25812000
APDEDTLIQLLTHAK	15	0	1663.88	Q8R2Y8	Q8R2Y8	122	136	Ptrh2	Peptidyl-tRNA hydrolase 2, mitochondrial	yes	yes	3	0.0010138	55.66	29060000	0	0	29060000	0	0	0	13916000	0
APDFVFYAPR	10	0	1181.59	A0A5F8MPB9;P26043;Q7TSG6;P26041;P26040	P26040	264	273	Rdx;Msn;Ezr	Radixin;Moesin;Ezrin	no	no	2	0.0049862	84.498	83169000	40752000	42416000	0	0	40752000	39624000	0	0
APEIMLNSK	9	0	1001.52	P63085;A0A0U1RPX4;D3Z3G6;Q63844;D3Z6D8	P63085	193	201	Mapk1;Mapk3	Mitogen-activated protein kinase 1;Mitogen-activated protein kinase;Mitogen-activated protein kinase 3	yes	no	2	0.03846	63.534	18119000	18119000	0	0	0	18119000	0	0	0
APFDLFENK	9	0	1079.53	P11499;E9Q3D6	P11499	339	347	Hsp90ab1	Heat shock protein HSP 90-beta	yes	no	2	0.033192	66.692	9949600	0	9949600	0	0	0	9294600	0	0
APGFAQMLK	9	0	961.506	P42932;H3BL49;H3BKR8	P42932	8	16	Cct8	T-complex protein 1 subunit theta	yes	no	2	0.012368	87.284	53501000	0	0	26089000	27412000	0	0	12493000	13555000
APGTPHSHTKPYVR	14	1	1546.8	A0A1B0GSF7;A0A1B0GQU8;P35980;A0A1B0GSS8;A0A1B0GS28	A0A1B0GSF7	103	116	Rpl18	60S ribosomal protein L18	yes	no	2;3;4	0.00032412	89.171	135880000	0	6543000	58189000	71143000	0	6112200	27864000	35180000
APILIATDVASR	12	0	1225.7	Q8BTS0;Q61656;S4R1I6;Q3U741;Q501J6;Q3TU25	Q8BTS0	392	403	Ddx5;Ddx17	Probable ATP-dependent RNA helicase DDX5;Probable ATP-dependent RNA helicase DDX17	no	no	2	0.00057459	110.14	1639800000	381420000	401280000	405410000	451710000	381420000	374860000	194130000	223370000
APIRPDIVNFVHTNLR	16	1	1861.03	Q9D8E6	Q9D8E6	30	45	Rpl4	60S ribosomal protein L4	yes	yes	3;4	0.00074159	66.335	369010000	52318000	26420000	136620000	153650000	52318000	24681000	65419000	75982000
APKPDGPGGGPGGSHMGGNYGDDR	24	1	2251.97	Q8CFQ9;P56959;G3UXT7;G3UZD2;Q91VQ2	Q8CFQ9	441	464	Fus	RNA-binding protein FUS	yes	no	2;3;4	2.0217e-96	142.42	6795100000	150590000	210730000	3461700000	2972100000	150590000	196860000	1657600000	1469700000
APKPDGPGGGPGGSHMGGNYGDDRR	25	2	2408.07	Q8CFQ9;P56959;G3UXT7;G3UZD2;Q91VQ2	Q8CFQ9	441	465	Fus	RNA-binding protein FUS	yes	no	3;4;5	2.1071e-88	174.7	917740000	0	0	391390000	526360000	0	0	187420000	260280000
APLVPHSGSIEK	12	0	1233.67	Q8R1N0	Q8R1N0	208	219	Znf830	Zinc finger protein 830	yes	yes	3	0.0049694	50.207	62491000	0	0	28365000	34126000	0	0	13583000	16875000
APLVPPGSPVVNALFR	16	0	1632.94	Q9JHU9	Q9JHU9	466	481	Isyna1	Inositol-3-phosphate synthase 1	yes	yes	2	0.0041569	44.765	0	0	0	0	0	0	0	0	0
APPSAPLLLRAVGEAGPTR	19	1	1872.06	D3Z3V5;Q8BKK5	D3Z3V5	2	20	Zfp689;Znf689	Zinc finger protein 689	yes	no	2	0.0062598	53.967	1544200000	0	0	816950000	727280000	0	0	391200000	359640000
APQVSTPTLVEAAR	14	0	1438.78	P07724	P07724	439	452	Alb	Serum albumin	yes	yes	2	0.0014396	68.536	206990000	0	0	112690000	94301000	0	0	53965000	46631000
APQVYILPPPAEQLSR	16	0	1777.97	A0A075B5P3;A0A0A6YVP0;P01867	P01867	233	248	Ighg2b;Igh-3	Ig gamma-2B chain C region	no	no	2;3	0.00010141	101.71	112940000000	73956000	0	57395000000	55471000000	73956000	0	27484000000	27430000000
APQVYILPPPAEQLSRK	17	1	1906.07	A0A075B5P3;A0A0A6YVP0;P01867	P01867	233	249	Ighg2b;Igh-3	Ig gamma-2B chain C region	no	no	3	0.0024199	44.391	341180000	0	0	167580000	173600000	0	0	80246000	85846000
APSTSTPEPTR	11	0	1142.56	E9QKR1;A0A0A6YW06;J3QNM3;E9QKQ9;E9QLZ9;Q03173;A0A0A6YXC8	E9QKR1	455	465	Enah	Protein enabled homolog	yes	no	2	0.017718	52.579	14669000	7994400	6674100	0	0	7994400	6234700	0	0
APSYLEISSMR	11	0	1252.61	G3UYD0;Q3UHU8;Q9ESZ8;G3UX27	G3UYD0	832	842	Gtf2i	General transcription factor II-I	yes	no	2	0.015246	66.19	92866000	41885000	50980000	0	0	41885000	47624000	0	0
APVPTGEVYFADSFDR	16	0	1769.83	P35564	P35564	63	78	Canx	Calnexin	yes	yes	2	0.00088265	66.262	777480000	0	0	392920000	384570000	0	0	188150000	190170000
APWELLELR	9	0	1125.62	A2A7S7;Q91WQ3;F6VXZ2	A2A7S7	121	129	Yars	Tyrosine--tRNA ligase;Tyrosine--tRNA ligase, cytoplasmic;Tyrosine--tRNA ligase, cytoplasmic, N-terminally processed	yes	no	2	0.01154	91.853	14834000	7166500	7667700	0	0	7166500	7162800	0	0
AQASAPAQAPK	11	0	1038.55	P47915	P47915	135	145	Rpl29	60S ribosomal protein L29	yes	yes	2	3.532e-26	164.68	234320000	45115000	52762000	91351000	45090000	45115000	49289000	43744000	22297000
AQATPSQPLQSSQPK	15	0	1566.8	Q3UHJ0	Q3UHJ0	420	434	Aak1	AP2-associated protein kinase 1	yes	yes	2	0.0070565	44.188	17434000	0	0	0	17434000	0	0	0	8621100
AQCPIVER	8	0	971.486	Q91V55;D3YYM6;D3Z1S8;P97461	Q91V55	64	71	Rps5	40S ribosomal protein S5;40S ribosomal protein S5, N-terminally processed	yes	no	2	1.9305e-05	126.67	179840000	0	0	95653000	84183000	0	0	45804000	41628000
AQDIQCGLQSR	11	0	1274.6	E0CYQ2;Q9CQ48	E0CYQ2	40	50	Nudcd2	NudC domain-containing protein 2	yes	no	2	0.0063774	62.463	4811100	4811100	0	0	0	4811100	0	0	0
AQDQGEKENPMR	12	1	1401.63	Q9CXW4	Q9CXW4	2	13	Rpl11	60S ribosomal protein L11	yes	yes	2	0.0076895	42.743	158090000	0	0	0	158090000	0	0	0	78174000
AQEIDQTNDFK	11	0	1307.6	Q9JHI5	Q9JHI5	66	76	Ivd	Isovaleryl-CoA dehydrogenase, mitochondrial	yes	yes	2	0.013642	55.549	19275000	0	19275000	0	0	0	18006000	0	0
AQELEGLDVEYR	12	0	1420.68	Q9Z0H8	Q9Z0H8	733	744	Clip2	CAP-Gly domain-containing linker protein 2	yes	yes	2	0.0040382	61.65	22519000	22519000	0	0	0	22519000	0	0	0
AQFEGIVTDLIK	12	0	1332.73	P38647	P38647	349	360	Hspa9	Stress-70 protein, mitochondrial	yes	yes	2	0.0007741	84.17	130900000	0	0	68234000	62669000	0	0	32675000	30990000
AQFGQPEILLGTIPGAGGTQR	21	0	2110.12	Q8BH95	Q8BH95	158	178	Echs1	Enoyl-CoA hydratase, mitochondrial	yes	yes	2;3	2.4971e-06	49.929	398450000	164630000	147860000	38010000	47944000	164630000	138120000	18202000	23708000
AQGASDVVLYK	11	0	1149.6	Q9WUA2;A0A087WS80	Q9WUA2	54	64	Farsb	Phenylalanine--tRNA ligase beta subunit	yes	no	2	0.029053	56.729	16118000	0	16118000	0	0	0	15057000	0	0
AQIEDSLRR	9	1	1086.58	Q9D8X2	Q9D8X2	97	105	Ccdc124	Coiled-coil domain-containing protein 124	yes	yes	2;3	0.009723	76.064	105950000	0	0	70357000	35592000	0	0	33691000	17600000
AQILPIR	7	0	809.512	Q5SXR6;Q68FD5	Q5SXR6	2	8	Cltc	Clathrin heavy chain;Clathrin heavy chain 1	yes	no	2	0.031635	44.611	17806000	6772000	11034000	0	0	6772000	10307000	0	0
AQIWDTAGQER	11	0	1273.61	G3UY29;E9Q3P9;F8WGS1;P62492;P46638;G3UZL4;G3UZD3	G3UY29	62	72	Rab11b;Rab11a	Ras-related protein Rab-11A;Ras-related protein Rab-11B	yes	no	2	0.00064963	99.653	81042000	37774000	43268000	0	0	37774000	40419000	0	0
AQLGEDIRR	9	1	1056.57	Q9Z1A1;B8JJG9;B8JJG7;B8JJG8	Q9Z1A1	15	23	Tfg		yes	no	3	0.024416	57.859	86402000	0	0	86402000	0	0	0	41374000	0
AQQNNVEHKVETFSGVYK	18	1	2077.02	P62082	P62082	161	178	Rps7	40S ribosomal protein S7	yes	yes	2;3	0.00011617	66.262	89296000	0	0	39969000	49327000	0	0	19139000	24392000
AQSPCFGDDDPAKKEPR	17	2	1916.87	Q9CZC8;A0A0N4SWD0	Q9CZC8	320	336	Scrn1	Secernin-1	yes	no	4	3.0237e-05	57.936	15237000	0	0	15237000	0	0	0	7296400	0
AQTAPNKDVQR	11	1	1226.64	Q8BGQ7	Q8BGQ7	783	793	Aars	Alanine--tRNA ligase, cytoplasmic	yes	yes	3	0.0014774	79.659	34271000	0	0	18312000	15960000	0	0	8768700	7892000
AQVEDAFR	8	0	934.451	P19096;A0A0U1RNJ1	P19096	1827	1834	Fasn	Fatty acid synthase;[Acyl-carrier-protein] S-acetyltransferase;[Acyl-carrier-protein] S-malonyltransferase;3-oxoacyl-[acyl-carrier-protein] synthase;3-oxoacyl-[acyl-carrier-protein] reductase;3-hydroxyacyl-[acyl-carrier-protein] dehydratase;Enoyl-[acyl-carrier-protein] reductase;Oleoyl-[acyl-carrier-protein] hydrolase	yes	no	2	0.034342	88.942	26907000	0	0	26907000	0	0	0	12884000	0
AQYESLAAK	9	0	979.497	P46660	P46660	270	278	Ina	Alpha-internexin	yes	yes	2	0.022234	73.26	8376200	3848000	4528200	0	0	3848000	4230100	0	0
ARDDLITDLLNEAK	14	1	1585.83	P50518;A0A0N4SW34;A0A0N4SW07	P50518	86	99	Atp6v1e1	V-type proton ATPase subunit E 1	yes	no	3	0.00059475	65.805	6870300	2436700	4433600	0	0	2436700	4141700	0	0
ARLEIEPEWAYGK	13	1	1560.79	Q62446;A0A1Y7VLK0;A0A1Y7VP01;A0A1Y7VJ86	Q62446	188	200	Fkbp3	Peptidyl-prolyl cis-trans isomerase FKBP3	yes	no	3	0.01196	45.115	16786000	7622400	9163200	0	0	7622400	8559900	0	0
ARPEYMLPVHFYGR	14	1	1734.87	Q8CI94	Q8CI94	193	206	Pygb	Glycogen phosphorylase, brain form	yes	yes	4	0.00053614	61.212	10511000	0	10511000	0	0	0	9819200	0	0
ARPFPDGLAEDIDKGEVSAR	20	2	2142.07	P58252	P58252	606	625	Eef2	Elongation factor 2	yes	yes	3;4	6.0355e-06	68.952	245320000	11748000	11808000	92228000	129540000	11748000	11030000	44164000	64056000
ARVDHGAEIITQSPSR	16	1	1735.9	A0A668KLC6;P20357;Q80X35;Q80ZL4;Q3TLQ0	A0A668KLC6	1932	1947	Map2	Microtubule-associated protein 2;Microtubule-associated protein	yes	no	3;4	0.00094786	61.265	134530000	15170000	16083000	70016000	33258000	15170000	15024000	33528000	16446000
ASAGSAFFPGR	11	0	1066.52	Q9WUA2	Q9WUA2	537	547	Farsb	Phenylalanine--tRNA ligase beta subunit	yes	yes	2	0.001276	105.52	18672000	9318700	9353400	0	0	9318700	8737600	0	0
ASAPATPLSPTR	12	0	1167.62	P14733	P14733	16	27	Lmnb1	Lamin-B1	yes	yes	2	4.7163e-07	105.2	211220000	29480000	28210000	0	153530000	29480000	26352000	0	75919000
ASAVLSSVLTTASR	14	0	1361.75	A0A286YD22;A0A286YDT9;A0A286YDG2;Q9JMB0	A0A286YD22	2	15	Gkap1	G kinase-anchoring protein 1	yes	no	2	0.00014057	78.342	27526000	0	0	14769000	12757000	0	0	7072200	6308200
ASEGASIPSPVVR	13	0	1268.67	Q9ESN6;D3YTN5;D3YY69	Q9ESN6	2	14	Trim2	Tripartite motif-containing protein 2	yes	no	2	0.0003344	61.65	6630000	6630000	0	0	0	6630000	0	0	0
ASGADSKGDDLSTAILK	17	1	1647.83	Q01853	Q01853	2	18	Vcp	Transitional endoplasmic reticulum ATPase	yes	yes	2	9.3293e-19	141.54	272850000	0	0	150300000	122550000	0	0	71973000	60599000
ASGAPPGGQQR	11	0	1024.51	O88935	O88935	577	587	Syn1	Synapsin-1	yes	yes	2	0.021524	50.607	3214500	0	3214500	0	0	0	3002900	0	0
ASGNAQIGK	9	0	844.44	Q61171;D3Z4A4	Q61171	2	10	Prdx2	Peroxiredoxin-2	yes	no	1	0.008348	50.04	375640000	375640000	0	0	0	375640000	0	0	0
ASGNYATVISHNPETK	16	0	1687.82	P62918	P62918	129	144	Rpl8	60S ribosomal protein L8	yes	yes	3	0.00095314	43.37	63133000	30831000	32303000	0	0	30831000	30176000	0	0
ASGQAFELILSPR	13	0	1387.75	P54227;D3Z1Z8;D3Z5N2	P54227	15	27	Stmn1	Stathmin	yes	no	2;3	0.00084471	55.839	646550000	281710000	364840000	0	0	281710000	340820000	0	0
ASGTEAADFALPSSR	15	0	1478.7	A0A5H1ZRL7;P70399	A0A5H1ZRL7	1338	1352	Tp53bp1	Tumor suppressor p53-binding protein 1	yes	no	2	0.0040574	51.841	66975000	35013000	31962000	0	0	35013000	29858000	0	0
ASGVAVSDGVIK	12	0	1101.6	P18760;F8WGL3;A0A494B9A7	P18760	2	13	Cfl1	Cofilin-1	yes	no	1;2	8.1462e-05	107.83	1905800000	555160000	0	993240000	357420000	555160000	0	475620000	176740000
ASGVQVADEVCR	12	0	1289.6	Q9R0P5	Q9R0P5	2	13	Dstn	Destrin	yes	yes	2	1.0715e-06	121.5	1149400000	443360000	479440000	101150000	125450000	443360000	447880000	48437000	62036000
ASGVTVNDEVIK	12	0	1230.65	P45591;A0A1Y7VJ71	P45591	2	13	Cfl2	Cofilin-2	yes	no	2	0.0018181	51.927	18720000	0	18720000	0	0	0	17487000	0	0
ASHSAVDITK	10	0	1027.53	A0JNY3;Q8BUV3	A0JNY3	338	347	Gphn	Gephyrin;Molybdopterin adenylyltransferase;Molybdopterin molybdenumtransferase	yes	no	2	0.026945	67.507	0	0	0	0	0	0	0	0	0
ASILNTWISLK	11	0	1244.71	Q9DCL9	Q9DCL9	404	414	Paics	Multifunctional protein ADE2;Phosphoribosylaminoimidazole-succinocarboxamide synthase;Phosphoribosylaminoimidazole carboxylase	yes	yes	2	0.015201	54.066	47685000	0	0	0	47685000	0	0	0	23580000
ASLSLADHR	9	0	968.504	A2AS98;P28660	A2AS98	508	516	Nckap1	Nck-associated protein 1	yes	no	2	0.042407	67.993	9818000	0	9818000	0	0	0	9171600	0	0
ASLSLAPVNIFK	12	0	1258.73	P80314;A0A1W2P7B7;A0A1W2P6Q3	P80314	2	13	Cct2	T-complex protein 1 subunit beta	yes	no	2	0.00041544	83.998	203420000	0	33751000	93091000	76574000	0	31529000	44577000	37866000
ASLTLFCPEEGDWK	14	0	1651.76	P14873	P14873	184	197	Map1b	Microtubule-associated protein 1B;MAP1B heavy chain;MAP1 light chain LC1	yes	yes	2	0.00074387	100.72	1074600000	0	0	533650000	540920000	0	0	255550000	267480000
ASLVPLKEK	9	1	983.602	P56135	P56135	2	10	Atp5j2	ATP synthase subunit f, mitochondrial	yes	yes	2	0.0085976	66.621	38605000	7385500	0	16615000	14605000	7385500	0	7956100	7222300
ASLYNAVTTEDVEK	14	0	1538.75	Q3U6K9;Q99K85	Q3U6K9	340	353	Psat1	Phosphoserine aminotransferase	yes	no	2	0.029885	45.359	20684000	0	20684000	0	0	0	19322000	0	0
ASMQQQQQLASAR	13	0	1445.7	E9PW20;Q9CY57;D3YZA1;D3Z7T7	E9PW20	39	51	Chtop	Chromatin target of PRMT1 protein	yes	no	2	7.3372e-06	121.08	1154700000	140480000	121820000	493380000	399020000	140480000	113800000	236260000	197310000
ASNVTNK	7	0	732.377	Q9Z204;A0A2I3BRM6;A0A2I3BQH3;A0A2I3BQW7	Q9Z204	2	8	Hnrnpc	Heterogeneous nuclear ribonucleoproteins C1/C2	yes	no	1	0.01315	65.252	16631000	0	16631000	0	0	0	15536000	0	0
ASPAPTPTPAGAASPLAAVAAPATDAPQAK	30	0	2667.39	P13595;A0A0A6YY91	P13595	945	974	Ncam1	Neural cell adhesion molecule 1	yes	no	2;3	1.0271e-17	48.76	278430000	0	0	162800000	115630000	0	0	77959000	57180000
ASQRPDVLTTGGGNPIGDK	19	1	1881.95	P24270;A2AL20	P24270	20	38	Cat	Catalase	yes	no	3	0.0056147	37.552	34540000	34540000	0	0	0	34540000	0	0	0
ASQSQGIQQLLQAEK	15	0	1627.85	Q9CR51	Q9CR51	2	16	Atp6v1g1	V-type proton ATPase subunit G 1	yes	yes	2	4.7957e-05	110.08	104450000	45197000	0	59256000	0	45197000	0	28375000	0
ASSELFNQK	9	0	1022.5	Q8JZK9	Q8JZK9	322	330	Hmgcs1	Hydroxymethylglutaryl-CoA synthase, cytoplasmic	yes	yes	2	0.0055519	101.64	12805000	12805000	0	0	0	12805000	0	0	0
ASSFVLALEPELESR	15	0	1646.85	Q91YQ5;A0A0N4SUJ8	Q91YQ5	67	81	Rpn1	Dolichyl-diphosphooligosaccharide--protein glycosyltransferase subunit 1	yes	no	2	0.00024675	84.479	77296000	0	0	29068000	48229000	0	0	13919000	23849000
ASSNESLVANR	11	0	1146.56	Q61029	Q61029	286	296	Tmpo	Lamina-associated polypeptide 2, isoforms beta/delta/epsilon/gamma	yes	yes	2	0.0018497	78.098	163000000	51760000	55635000	28547000	27058000	51760000	51972000	13670000	13380000
ASSVTTFTGEPNMCPR	16	0	1753.78	Q9DCT8	Q9DCT8	113	128	Crip2	Cysteine-rich protein 2	yes	yes	2;3	0.00045711	78.342	745900000	273130000	230240000	126940000	115590000	273130000	215080000	60788000	57157000
ASTPYNHHGSR	11	0	1225.56	Q8BTV2	Q8BTV2	313	323	Cpsf7	Cleavage and polyadenylation specificity factor subunit 7	yes	yes	3	0.0060784	42.843	5794500	0	5794500	0	0	0	5413000	0	0
ASVLEELQK	9	0	1015.55	Q9CXW3;A0A0A6YY29	Q9CXW3	2	10	Cacybp	Calcyclin-binding protein	yes	no	2	0.0077081	54.157	2522400	0	2522400	0	0	0	2356300	0	0
ASVSDLSPR	9	0	930.477	Q569Z6;Q8BZN7	Q569Z6	237	245	Thrap3	Thyroid hormone receptor-associated protein 3	yes	no	2	0.025372	71.379	13486000	0	0	13486000	0	0	0	6458000	0
ASYVAPLTAQPATYR	15	0	1607.83	Q8C2Q3;E9QL13	Q8C2Q3	224	238	Rbm14	RNA-binding protein 14	yes	no	2	0.013897	40.589	17623000	0	17623000	0	0	0	16463000	0	0
ATADDELSFK	10	0	1095.51	B1AT92;Q60631;B1AT95	B1AT92	11	20	Grb2	Growth factor receptor-bound protein 2	yes	no	2	0.018553	64.654	32052000	13553000	18499000	0	0	13553000	17281000	0	0
ATAGAPPDSSLVTYELHSRPEQDK	24	1	2568.25	Q99KJ8	Q99KJ8	195	218	Dctn2	Dynactin subunit 2	yes	yes	4	0.0011195	36.295	39065000	0	0	39065000	0	0	0	18706000	0
ATAGAYIASQTVK	13	0	1279.68	O55234	O55234	79	91	Psmb5	Proteasome subunit beta type-5	yes	yes	2	0.028014	47.894	127040000	0	0	0	127040000	0	0	0	62821000
ATAPYNYSYIFK	12	0	1436.7	Q91V41;Q50HX3	Q91V41	2	13	Rab14	Ras-related protein Rab-14	yes	no	2	0.00033153	71.349	84949000	42896000	42053000	0	0	42896000	39284000	0	0
ATATPVQQQR	10	0	1098.58	P14733	P14733	2	11	Lmnb1	Lamin-B1	yes	yes	2	9.3273e-10	131.06	35113000	17591000	17522000	0	0	17591000	16368000	0	0
ATAVMPDGQFK	11	0	1163.56	P35700;B1AXW5;B1AXW6;B1AXW4	P35700	17	27	Prdx1	Peroxiredoxin-1	yes	no	2	1.5684e-12	120.12	652250000	323920000	328330000	0	0	323920000	306720000	0	0
ATAVVVNIGKK	11	1	1098.68	Q9DCL9;D3Z6P1;D6RCU8	Q9DCL9	2	12	Paics	Multifunctional protein ADE2;Phosphoribosylaminoimidazole-succinocarboxamide synthase;Phosphoribosylaminoimidazole carboxylase	yes	no	2	3.9538e-05	103.56	33674000	16793000	16881000	0	0	16793000	15769000	0	0
ATCIGNNSAAAVSMLK	16	0	1606.78	Q9R1P0;E9PW69	Q9R1P0	161	176	Psma4	Proteasome subunit alpha type-4;Proteasome subunit alpha type	yes	no	2	0.0015227	57.802	119430000	0	0	60008000	59426000	0	0	28735000	29386000
ATDFVVDR	8	0	921.456	P54071;D6RIL6;A0A0U1RP68	P54071	181	188	Idh2	Isocitrate dehydrogenase [NADP], mitochondrial	yes	no	2	0.037299	81.191	22706000	0	22706000	0	0	0	21211000	0	0
ATDFVVPGPGK	11	0	1086.57	O88844;A0A087WPT4;A0A087WRS9	O88844	141	151	Idh1	Isocitrate dehydrogenase [NADP] cytoplasmic	yes	no	2	0.0062524	62.582	38664000	19298000	19366000	0	0	19298000	18091000	0	0
ATDMSQGELIHPK	13	0	1425.69	Z4YKB8;Q3TEA8;A2AM70;A2AM69	Z4YKB8	2	14	Hp1bp3	Heterochromatin protein 1-binding protein 3	yes	no	2	0.013459	42.743	18232000	0	18232000	0	0	0	17032000	0	0
ATEGMILTNHDHQIR	15	0	1734.85	A0JNY3;Q8BUV3	A0JNY3	2	16	Gphn	Gephyrin;Molybdopterin adenylyltransferase;Molybdopterin molybdenumtransferase	no	no		1	NaN	0	0	0	0	0	0	0	0	0
ATEGMVVADKNCSK	14	1	1508.7	P70195	P70195	63	76	Psmb7	Proteasome subunit beta type-7	yes	yes	2	0.002932	60.49	40658000	0	0	0	40658000	0	0	0	20105000
ATENDIANFFSPLNPIR	17	0	1917.96	D3YWT1;D3Z3N4	D3YWT1	191	207	Hnrnph3		yes	no	2;3	0.0013493	62.924	118120000	0	0	50622000	67495000	0	0	24241000	33376000
ATENDIYNFFSPLNPVR	17	0	1995.97	Q8C2Q7;O35737;Q9Z2X1	Q8C2Q7	300	316	Hnrnph1;Hnrnpf	Heterogeneous nuclear ribonucleoprotein H;Heterogeneous nuclear ribonucleoprotein H, N-terminally processed;Heterogeneous nuclear ribonucleoprotein F;Heterogeneous nuclear ribonucleoprotein F, N-terminally processed	no	no	2;3	0.00013158	95.138	538100000	0	0	278260000	259850000	0	0	133250000	128490000
ATFDAISK	8	0	851.439	P25444;D3YVC1;D3YWJ3	P25444	239	246	Rps2	40S ribosomal protein S2	yes	no	2	0.03609	84.498	154120000	0	0	154120000	0	0	0	73802000	0
ATGPAPGPSVDRETVAAPGR	20	1	1904.97	Q7TSJ2;D3Z6W1	Q7TSJ2	78	97	Map6	Microtubule-associated protein 6	yes	no	3	2.2631e-05	49.865	26304000	26304000	0	0	0	26304000	0	0	0
ATGPPVSELITK	12	0	1211.68	P43276	P43276	35	46	Hist1h1b	Histone H1.5	yes	yes	2	0.0013515	78.653	847490000	92111000	0	386420000	368960000	92111000	0	185040000	182450000
ATIAGGGVIPHIHK	14	0	1369.78	Q3THW5;P0C0S6;Q8R029;Q3UA95	Q3THW5	103	116	H2afv;H2afz	Histone H2A.V;Histone H2A.Z;Histone H2A	yes	no	2;3;4	0.00066462	79.974	2875600000	0	0	1106100000	1769500000	0	0	529670000	875030000
ATIATMPVPETR	12	0	1285.67	Q62189;D3Z0S6;D6RI83	Q62189	2	13	Snrpa	U1 small nuclear ribonucleoprotein A	yes	no	2	1.4973e-08	125.97	515800000	50279000	59993000	197000000	208520000	50279000	56043000	94337000	103110000
ATLKDQLIVNLLK	13	1	1467.9	P06151;A0A1B0GSR9;D3YZQ9;A0A1B0GT41;A0A1B0GQX5;A0A1B0GSL7;A0A1B0GRC1;A0A1B0GRS2;A0A1B0GRW9;A0A1B0GS79	P06151	2	14	Ldha	L-lactate dehydrogenase A chain;L-lactate dehydrogenase	yes	no	2	0.0039022	44.309	16975000	0	0	0	16975000	0	0	0	8394000
ATLPSPDKLPGFK	13	1	1369.76	Q02053	Q02053	831	843	Uba1	Ubiquitin-like modifier-activating enzyme 1	yes	yes	3	0.0012729	69.03	118880000	0	0	45653000	73224000	0	0	21861000	36209000
ATLYVTAIEDR	11	0	1250.65	A0A171KXD3;Q9JIF0;A0A140LHF7;A0A140LJF4	A0A171KXD3	143	153	Prmt1	Protein arginine N-methyltransferase 1	yes	no	2	0.017311	52.79	80128000	40781000	39347000	0	0	40781000	36756000	0	0
ATNFLAHEK	9	0	1029.52	E9QN08;A0A0R4J1L2;Q91VK2;Q80T06;P57776;D3Z7N2;D3YY68;D3YUQ9;D3YZT9	E9QN08	2	10	Eef1d	Elongation factor 1-delta	yes	no	2	0.00048508	116.52	67638000	0	10457000	26221000	30960000	0	9768200	12556000	15310000
ATQALVLAPTR	11	0	1139.67	P60843	P60843	100	110	Eif4a1	Eukaryotic initiation factor 4A-I	yes	yes	2	0.0065104	65.627	47589000	0	0	47589000	0	0	0	22789000	0
ATSASSHLNK	10	0	1014.51	P15105;D3YVK1	P15105	2	11	Glul	Glutamine synthetase	yes	no	2	2.4715e-09	136.39	73800000	32166000	41634000	0	0	32166000	38893000	0	0
ATSPSTLVSTGPSSR	15	0	1446.73	P27546	P27546	783	797	Map4	Microtubule-associated protein 4	no	no	2	0.0032842	53.967	191070000	32553000	47263000	58329000	52921000	32553000	44152000	27931000	26169000
ATTHEVMGPK	10	0	1069.52	A0A087WSI9;Q3TWS4;E9Q9A3;E9QQ05;A0A5F8MPL3;E9QLK9;Q61548	A0A087WSI9	29	38	Snap91	Clathrin coat assembly protein AP180	yes	no	3	0.03804	31.843	14239000	0	0	14239000	0	0	0	6818500	0
ATVLDLSCNK	10	0	1119.56	Q922Q8	Q922Q8	41	50	Lrrc59	Leucine-rich repeat-containing protein 59	yes	yes	2	0.004557	88.819	65676000	0	0	36486000	29191000	0	0	17471000	14435000
ATVLTTER	8	0	889.487	Q99KP6	Q99KP6	180	187	Prpf19	Pre-mRNA-processing factor 19	yes	yes	2	0.033781	90.37	34460000	16860000	17600000	0	0	16860000	16441000	0	0
ATVVVEATEPEPSGSIGNPAASTSPSLSHR	30	0	2947.45	P14873	P14873	2	31	Map1b	Microtubule-associated protein 1B;MAP1B heavy chain;MAP1 light chain LC1	yes	yes	3	2.8851e-18	51.844	83151000	0	0	83151000	0	0	0	39817000	0
AVAALLTIPEAEK	13	0	1324.76	Q6ZQ38	Q6ZQ38	1179	1191	Cand1	Cullin-associated NEDD8-dissociated protein 1	yes	yes	2	0.0054279	68.657	112330000	43256000	69076000	0	0	43256000	64528000	0	0
AVAFQNSQTR	10	0	1120.56	Q9DB77;A0A140LI98	Q9DB77	163	172	Uqcrc2	Cytochrome b-c1 complex subunit 2, mitochondrial	yes	no	2	1.8694e-05	126.41	56443000	30439000	26003000	0	0	30439000	24291000	0	0
AVAGDYSDPVTLETR	15	0	1592.77	E0CXZ1;J3QM95;F8WGT4;Q8BYN5	E0CXZ1	252	266	Fsd1l	FSD1-like protein	yes	no	2	0.023903	35.71	34768000	0	34768000	0	0	0	32479000	0	0
AVAHILGIR	9	0	948.587	P19096;A0A0U1RNJ1	P19096	2124	2132	Fasn	Fatty acid synthase;[Acyl-carrier-protein] S-acetyltransferase;[Acyl-carrier-protein] S-malonyltransferase;3-oxoacyl-[acyl-carrier-protein] synthase;3-oxoacyl-[acyl-carrier-protein] reductase;3-hydroxyacyl-[acyl-carrier-protein] dehydratase;Enoyl-[acyl-carrier-protein] reductase;Oleoyl-[acyl-carrier-protein] hydrolase	yes	no	3	0.0053349	66.351	71336000	0	23095000	48240000	0	0	21575000	23100000	0
AVAIETQPAQGESDAVAR	18	0	1811.9	Q7TSJ2;D3Z6W1	Q7TSJ2	60	77	Map6	Microtubule-associated protein 6	yes	no	2	0.00090558	65.395	89130000	0	0	43485000	45646000	0	0	20823000	22572000
AVANQTSATFLR	12	0	1277.67	P62192	P62192	238	249	Psmc1	26S protease regulatory subunit 4	yes	yes	2	0.011954	51.927	21418000	0	21418000	0	0	0	20008000	0	0
AVAQALEVIPR	11	0	1165.68	P80318;E9Q133;Q3U0I3	P80318	439	449	Cct3	T-complex protein 1 subunit gamma	yes	no	2	4.9051e-08	130.75	386450000	106500000	117540000	84810000	77595000	106500000	109800000	40612000	38371000
AVAQGNLSSADVQAAK	16	0	1528.78	Q9DB77	Q9DB77	360	375	Uqcrc2	Cytochrome b-c1 complex subunit 2, mitochondrial	yes	yes	2	0.00024595	109.24	695510000	143580000	121850000	197280000	232790000	143580000	113830000	94470000	115110000
AVAVGRPSNEELR	13	1	1396.74	A0A0J9YTY0;A0A0J9YUL3;Q8C1B7	A0A0J9YTY0	2	14	Sept11	Septin-11	yes	no	2	0.001245	54.608	122720000	122720000	0	0	0	122720000	0	0	0
AVAVHQAEALPGPSLDQWHR	20	0	2181.11	D3YWC2;D3Z6F1;Q9JM93	D3YWC2	91	110	Arl6ip4	ADP-ribosylation factor-like protein 6-interacting protein 4	yes	no	4	8.5768e-07	80.975	65697000	0	0	45528000	20169000	0	0	21801000	9973400
AVCGFHLGYLDGEVELVNSVVTR	23	0	2533.26	Q62465	Q62465	335	357	Vat1	Synaptic vesicle membrane protein VAT-1 homolog	yes	yes	3	2.6849e-05	34.405	23351000	0	0	0	23351000	0	0	0	11547000
AVCMLSNTTAIAEAWAR	17	0	1863.9	P05213;A0A0A0MQA5;P68368;P68369;P05214	P68369	374	390	Tuba1b;Tuba4a;Tuba1a;Tuba3a	Tubulin alpha-1B chain;Tubulin alpha-4A chain;Tubulin alpha-1A chain;Tubulin alpha-3 chain	no	no	2;3	8.7246e-07	110.08	4175200000	287560000	332650000	1971600000	1583400000	287560000	310750000	944140000	782980000
AVDDGVNTFK	10	0	1064.51	P42932;H3BL49;H3BJB6	P42932	391	400	Cct8	T-complex protein 1 subunit theta	yes	no	2	0.0048697	85.67	78816000	17483000	17584000	17999000	25750000	17483000	16426000	8618900	12734000
AVDEAADALLK	11	0	1114.59	Q8CAQ8;E9QAY6;E9Q800;A0A0U1RP81;A0A1B0GX08	Q8CAQ8	286	296	Immt	MICOS complex subunit Mic60	yes	no	2	0.012898	56.258	10529000	4735100	5794100	0	0	4735100	5412700	0	0
AVDIPHMDIEALK	13	0	1450.75	A0A3B2WDD2;A0A3B2WBL1;Q5XJF6;A0A3B2W824;P53026;A0A3B2W820	A0A3B2WDD2	52	64	Rpl10a	Ribosomal protein;60S ribosomal protein L10a	yes	no	3	0.00084867	47.915	37668000	0	17891000	19777000	0	0	16713000	9470200	0
AVDIPHMDIEALKK	14	1	1578.84	A0A3B2WDD2;A0A3B2WBL1;Q5XJF6;A0A3B2W824;P53026;A0A3B2W820	A0A3B2WDD2	52	65	Rpl10a	Ribosomal protein;60S ribosomal protein L10a	yes	no	3;4	0.012169	39.424	43122000	0	43122000	0	0	0	40283000	0	0
AVDLQILPK	9	0	995.602	P47911	P47911	260	268	Rpl6	60S ribosomal protein L6	yes	yes	2	0.012068	88.942	42145000	20127000	22018000	0	0	20127000	20568000	0	0
AVDQWSTETIASHEDIER	18	0	2085.96	Q07797	Q07797	324	341	Lgals3bp	Galectin-3-binding protein	yes	yes	3	8.2231e-06	79.97	111890000	0	0	69433000	42461000	0	0	33248000	20997000
AVDSLVPIGR	10	0	1025.59	Q03265;D3Z6F5	Q03265	195	204	Atp5a1	ATP synthase subunit alpha, mitochondrial;ATP synthase subunit alpha	yes	no	2	3.3869e-06	131.06	213950000	43569000	52732000	61776000	55871000	43569000	49260000	29582000	27628000
AVEDIHGLFSLSK	13	0	1414.75	P23116	P23116	252	264	Eif3a	Eukaryotic translation initiation factor 3 subunit A	yes	yes	3	0.040311	26.359	6547000	0	6547000	0	0	0	6116000	0	0
AVELAANTK	9	0	915.503	P40142;A0A286YE28	P40142	457	465	Tkt	Transketolase	yes	no	2	0.013867	82.279	39753000	39753000	0	0	0	39753000	0	0	0
AVEMAAQR	8	0	874.433	Q8CHP8	Q8CHP8	221	228	Pgp	Phosphoglycolate phosphatase	yes	yes	2	0.036531	83.377	24881000	14350000	10531000	0	0	14350000	9837900	0	0
AVENSSTAIGIR	12	0	1216.64	O70435	O70435	30	41	Psma3	Proteasome subunit alpha type-3	yes	yes	2	0.019474	46.819	26319000	0	26319000	0	0	0	24587000	0	0
AVFDNLIQLEHLNIVK	16	0	1865.04	D3YUV1;Q99J45;A0A0J9YUZ6;A0A0J9YTX8;A0A0J9YUQ4	D3YUV1	116	131	Nrbp1	Nuclear receptor-binding protein	yes	no	3	0.025937	29.733	19373000	0	0	0	19373000	0	0	0	9579700
AVFPSIVGR	9	0	944.544	P60710;E9Q1F2;E9Q5F4;G3UZ07;E9Q2D1;F6WX90;P63260;G3UYG0;B1ATY1;E9Q606;P68134;P68033;P63268;P62737;A0A1D5RM20;D3Z2K3;A0A494B9T3;D3YZY0	P63260	29	37	Actb;Actg1;Actc1;Acta1;Actg2;Acta2	Actin, cytoplasmic 1;Actin, cytoplasmic 1, N-terminally processed;Actin, cytoplasmic 2;Actin, cytoplasmic 2, N-terminally processed;Actin, alpha skeletal muscle;Actin, alpha cardiac muscle 1;Actin, gamma-enteric smooth muscle;Actin, aortic smooth muscle	no	no	2	0.0028898	117.16	574860000	205350000	214150000	75142000	80223000	205350000	200050000	35982000	39670000
AVFPSIVGRPR	11	1	1197.7	P60710;E9Q1F2;E9Q5F4;G3UZ07;E9Q2D1;F6WX90;P63260;G3UYG0;B1ATY1;E9Q606;P68134;P68033;P63268;P62737;A0A1D5RM20;D3Z2K3;A0A494B9T3;D3YZY0	P63260	29	39	Actb;Actg1;Actc1;Acta1;Actg2;Acta2	Actin, cytoplasmic 1;Actin, cytoplasmic 1, N-terminally processed;Actin, cytoplasmic 2;Actin, cytoplasmic 2, N-terminally processed;Actin, alpha skeletal muscle;Actin, alpha cardiac muscle 1;Actin, gamma-enteric smooth muscle;Actin, aortic smooth muscle	no	no	2;3	5.6211e-27	190.26	1772900000	574080000	446460000	367120000	385250000	574080000	417060000	175800000	190510000
AVFQYIDENQDR	12	0	1496.69	Q9D1A2;A0A494B9S3;A0A494B9U6	Q9D1A2	6	17	Cndp2	Cytosolic non-specific dipeptidase	yes	no	2	0.016793	48.64	20577000	0	20577000	0	0	0	19222000	0	0
AVFVDLEPTVIDEVR	15	0	1700.9	P05213;A0A2R8VHF3;P68369	P68369	65	79	Tuba1b;Tuba1a	Tubulin alpha-1B chain;Tubulin alpha-1A chain	no	no	2;3	2.1632e-10	129.82	14953000000	1832900000	958880000	6266600000	5894700000	1832900000	895750000	3000800000	2914900000
AVGIWHCGSCMK	12	0	1404.61	A0A1D5RL86;P61514	A0A1D5RL86	22	33	Rpl37a	60S ribosomal protein L37a	yes	no	2;3	0.0013853	72.607	188280000	32245000	0	101160000	54873000	32245000	0	48441000	27134000
AVIDLNNR	8	0	913.498	Q9D883;G3UW94;A0A494B947	Q9D883	126	133	U2af1	Splicing factor U2AF 35 kDa subunit	yes	no	2	0.019308	101.21	335280000	0	0	164000000	171280000	0	0	78533000	84697000
AVLDALLEGK	10	0	1027.59	P14873	P14873	2396	2405	Map1b	Microtubule-associated protein 1B;MAP1B heavy chain;MAP1 light chain LC1	no	no	2	0.0045442	88.948	288030000	71655000	69452000	76519000	70406000	71655000	64880000	36642000	34816000
AVLFCLSEDKK	11	1	1308.67	P18760;F8WGL3;A0A494B9A7	P18760	35	45	Cfl1	Cofilin-1	yes	no	3	0.00091868	78.653	133860000	0	0	78434000	55429000	0	0	37559000	27410000
AVLGEVALYSGAR	13	0	1304.71	G3UY93;Q9Z1Q9;G3UYW2;G3UZ22	G3UY93	202	214	Vars	Valine--tRNA ligase	yes	no	2	0.00043022	90.685	58045000	0	0	32436000	25608000	0	0	15532000	12663000
AVLLAGPPGTGK	12	0	1079.63	P60122;D3YW60	P60122	65	76	Ruvbl1	RuvB-like 1	yes	no	2	0.026919	43.282	5673700	0	5673700	0	0	0	5300100	0	0
AVLVDLEPGTMDSVR	15	0	1600.81	P68372;Q9D6F9	P68372	63	77	Tubb4b;Tubb4a	Tubulin beta-4B chain;Tubulin beta-4A chain	no	no	2	0.0011197	90.653	1277900000	181520000	0	611490000	484930000	181520000	0	292820000	239800000
AVPKEDIHAGGGGAR	15	1	1433.74	Q9CX86	Q9CX86	173	187	Hnrnpa0	Heterogeneous nuclear ribonucleoprotein A0	yes	yes	2;3	8.8865e-06	68.132	116100000	61865000	54236000	0	0	61865000	50665000	0	0
AVPLALALISVSNPR	15	0	1519.91	Q8VDM4	Q8VDM4	689	703	Psmd2	26S proteasome non-ATPase regulatory subunit 2	yes	yes	2	0.00027229	84.479	32610000	0	0	15345000	17265000	0	0	7348200	8537400
AVPLPMTVR	9	0	982.563	F6U6Z2;F7D3N3;Q8BGT8;E0CXJ1;Q8K0S0	F6U6Z2	98	106	Phyhipl;Phyhip	Phytanoyl-CoA hydroxylase-interacting protein-like;Phytanoyl-CoA hydroxylase-interacting protein	yes	no	2	0.036496	75.213	8725600	8725600	0	0	0	8725600	0	0	0
AVPQLQGYLR	10	0	1143.64	P47911	P47911	271	280	Rpl6	60S ribosomal protein L6	yes	yes	2	0.00010305	114.78	186390000	76151000	82710000	27529000	0	76151000	77265000	13183000	0
AVQDLCGWR	9	0	1103.52	Q8BK67	Q8BK67	421	429	Rcc2	Protein RCC2	yes	yes	2	0.0089604	96.492	61311000	30791000	30520000	0	0	30791000	28510000	0	0
AVQISK	6	0	644.386	P62908;D3YV43;A0A140LI77	P62908	2	7	Rps3	40S ribosomal protein S3	yes	no	1	0.024286	60.788	206090000	206090000	0	0	0	206090000	0	0	0
AVQVHQDTLR	10	0	1165.62	A0A6I8MX18;Q8CJG1;H3BJ70	A0A6I8MX18	843	852	Ago1	Protein argonaute-1	no	no	2	0.021668	65.224	9509900	0	9509900	0	0	0	8883800	0	0
AVTELNEPLSNEDR	14	0	1585.76	P68510	P68510	29	42	Ywhah	14-3-3 protein eta	yes	yes	2	2.959e-28	180.66	624360000	0	0	289950000	334410000	0	0	138840000	165360000
AVTELNEPLSNEDRNLLSVAYK	22	1	2474.27	P68510	P68510	29	50	Ywhah	14-3-3 protein eta	yes	yes	3	1.6962e-07	65.184	120620000	0	0	120620000	0	0	0	57759000	0
AVTEQGAELSNEER	14	0	1531.71	P68254	P68254	28	41	Ywhaq	14-3-3 protein theta	yes	yes	2	1.1671e-44	175.15	768410000	191040000	0	278310000	299070000	191040000	0	133270000	147890000
AVTEQGHELSNEER	14	0	1597.73	Q9CQV8;A2A5N1	Q9CQV8	30	43	Ywhab	14-3-3 protein beta/alpha;14-3-3 protein beta/alpha, N-terminally processed	yes	no	2;3	2.6649e-28	182.35	424240000	56872000	48885000	194190000	124290000	56872000	45667000	92990000	61461000
AVTLDKDAYYR	11	1	1313.66	G3X956;Q920B9	G3X956	2	12	Supt16;Supt16h	FACT complex subunit SPT16	yes	no	2	0.0012835	58.676	0	0	0	0	0	0	0	0	0
AVTSEIAVLQSR	12	0	1272.7	Q91YQ5	Q91YQ5	526	537	Rpn1	Dolichyl-diphosphooligosaccharide--protein glycosyltransferase subunit 1	yes	yes	2	0.00088133	100.88	216120000	51270000	46620000	59425000	58809000	51270000	43550000	28456000	29081000
AVVAGLVR	8	0	783.497	Q9D051	Q9D051	2	9	Pdhb	Pyruvate dehydrogenase E1 component subunit beta, mitochondrial	yes	yes	2	0.036276	84.025	382290000	0	0	179620000	202660000	0	0	86015000	100220000
AVVGVVAGGGR	11	0	940.545	P62918	P62918	164	174	Rpl8	60S ribosomal protein L8	yes	yes	2	0.00055362	101.28	43436000	43436000	0	0	0	43436000	0	0	0
AVVIVDDR	8	0	885.492	Q99K48;Q8VIJ6	Q8VIJ6	392	399	Nono;Sfpq	Non-POU domain-containing octamer-binding protein;Splicing factor, proline- and glutamine-rich	no	no	2	0.0046757	120.65	618040000	172510000	0	221110000	224420000	172510000	0	105880000	110970000
AVVLHPLLYTFASGSPDNIK	20	0	2141.15	D3Z4V1;Q922V4	D3Z4V1	367	386	Plrg1	Pleiotropic regulator 1	yes	no	3	0.0021962	36.127	33935000	0	0	0	33935000	0	0	0	16781000
AVVQVFEGTSGIDAK	15	0	1519.79	P62814	P62814	94	108	Atp6v1b2	V-type proton ATPase subunit B, brain isoform	yes	yes	2	0.00087043	77.64	93284000	51677000	41607000	0	0	51677000	38867000	0	0
AVVVNAAQLASYSQSK	16	0	1634.86	Q5SX46;Q9CR62	Q5SX46	159	174	Slc25a11	Mitochondrial 2-oxoglutarate/malate carrier protein	yes	no	2	0.0017014	56.225	24688000	24688000	0	0	0	24688000	0	0	0
AVVVVDDR	8	0	871.476	Q8R326	Q8R326	184	191	Pspc1	Paraspeckle component 1	yes	yes	2	0.038723	77.058	92657000	0	0	92657000	0	0	0	44370000	0
AWDDFFPGSDR	11	0	1311.55	Q8R5J9	Q8R5J9	10	20	Arl6ip5	PRA1 family protein 3	yes	yes	2	0.0065651	66.435	17510000	0	17510000	0	0	0	16357000	0	0
AWNAVCPLVVR	11	0	1283.68	Q8BHZ0	Q8BHZ0	78	88	Fam49a	Protein FAM49A	yes	yes	2	0.018564	46.129	0	0	0	0	0	0	0	0	0
AWNLICDVSR	10	0	1232.6	Q9D0I9	Q9D0I9	307	316	Rars	Arginine--tRNA ligase, cytoplasmic	yes	yes	2	0.013389	69.954	24405000	8493200	15911000	0	0	8493200	14864000	0	0
AWQGTADGGMMER	13	0	1408.59	S4R1M2;D3YXK2	S4R1M2	856	868	Safb	Scaffold attachment factor B1	yes	no	2	0.01137	47.844	127020000	56253000	46062000	0	24702000	56253000	43029000	0	12215000
AWTVEQLR	8	0	1001.53	Q62446;A0A1Y7VLK0;A0A1Y7VMJ9	Q62446	9	16	Fkbp3	Peptidyl-prolyl cis-trans isomerase FKBP3	yes	no	2	0.002103	125.08	59828000	0	18798000	41030000	0	0	17560000	19648000	0
AYALAFAER	9	0	1010.52	P51660	P51660	24	32	Hsd17b4	Peroxisomal multifunctional enzyme type 2;(3R)-hydroxyacyl-CoA dehydrogenase;Enoyl-CoA hydratase 2	yes	yes	2	0.013706	82.452	10146000	4893100	5252700	0	0	4893100	4906900	0	0
AYAYLFK	7	0	874.459	P53994	P53994	2	8	Rab2a	Ras-related protein Rab-2A	yes	yes	1;2	0.0095509	65.331	22834000	0	2729800	20104000	0	0	2550000	9627100	0
AYDYLIQNTSFANR	14	0	1674.8	Q64514;Q05DJ9;A0A087WRC0;A0A087WP19	Q64514	507	520	Tpp2	Tripeptidyl-peptidase 2	yes	no	2	0.01079	44.318	28584000	13072000	15512000	0	0	13072000	14491000	0	0
AYGELPEHAK	10	0	1113.55	Q8BMJ3	Q8BMJ3	105	114	Eif1ax	Eukaryotic translation initiation factor 1A, X-chromosomal	no	no	2	0.0046741	87.639	246490000	0	0	131410000	115090000	0	0	62925000	56912000
AYGENIGYSEK	11	0	1229.56	P14094	P14094	279	289	Atp1b1	Sodium/potassium-transporting ATPase subunit beta-1	yes	yes	2	0.014632	54.608	25703000	8579700	17123000	0	0	8579700	15995000	0	0
AYHEQLSVAEITNACFEPANQMVK	24	0	2749.28	P05213;A0A0A0MQA5;P68368;P68369;P05214	P68369	281	304	Tuba1b;Tuba4a;Tuba1a;Tuba3a	Tubulin alpha-1B chain;Tubulin alpha-4A chain;Tubulin alpha-1A chain;Tubulin alpha-3 chain	no	no	2;3	1.0101e-14	83.064	6992300000	0	0	3792600000	3199700000	0	0	1816100000	1582200000
AYLPVNESFGFTADLR	16	0	1798.89	P58252	P58252	786	801	Eef2	Elongation factor 2	yes	yes	2	0.014692	37.968	51570000	0	0	0	51570000	0	0	0	25501000
AYSEAHEISK	10	0	1133.54	P61982	P61982	153	162	Ywhag	14-3-3 protein gamma;14-3-3 protein gamma, N-terminally processed	yes	yes	2;3	0.0032845	96.034	590790000	30416000	26544000	162650000	371180000	30416000	24797000	77887000	183550000
AYSFAMGCWPK	11	0	1316.57	Q8C460	Q8C460	278	288	Eri3	ERI1 exoribonuclease 3	yes	yes	2	0.015304	53.968	16886000	0	16886000	0	0	0	15774000	0	0
CAEIFVGGQSIGK	13	0	1364.68	Q9WUA2	Q9WUA2	548	560	Farsb	Phenylalanine--tRNA ligase beta subunit	yes	yes	2	0.038514	48.44	19819000	0	19819000	0	0	0	18514000	0	0
CALGWDHQEK	10	0	1242.55	Q921L6;Q60598	Q921L6	246	255	Cttn	Src substrate cortactin	yes	no	3	0.025	47.706	10677000	10677000	0	0	0	10677000	0	0	0
CAMTALSSK	9	0	967.447	P80313;A0A0N4SV00	P80313	158	166	Cct7	T-complex protein 1 subunit eta	yes	no	2	0.007354	77.732	0	0	0	0	0	0	0	0	0
CAQGCVCK	8	0	981.383	P02802;A0A1D5RLN7	P02802	44	51	Mt1	Metallothionein-1	yes	no	2	0.035158	86.866	8134600	0	8134600	0	0	0	7599000	0	0
CATITPDEAR	10	0	1132.52	P54071;D6RIL6;A0A0U1RP68	P54071	113	122	Idh2	Isocitrate dehydrogenase [NADP], mitochondrial	yes	no	2	0.0015882	107.15	32272000	14853000	17419000	0	0	14853000	16272000	0	0
CAVVDVPFGGAK	12	0	1218.61	P26443	P26443	172	183	Glud1	Glutamate dehydrogenase 1, mitochondrial	yes	yes	2	0.0038736	71.451	25263000	0	25263000	0	0	0	23599000	0	0
CCFLCMVCR	9	0	1304.5	P97314;A0A1W2P845;A0A1W2P7N8;A0A1W2P6I3;A0A1W2P758	P97314	33	41	Csrp2	Cysteine and glycine-rich protein 2	yes	no	2	0.010022	94.887	125650000	59428000	66226000	0	0	59428000	61866000	0	0
CCMLFVDDMAEPR	13	0	1642.66	Q8VDP4	Q8VDP4	324	336	Ccar2	Cell cycle and apoptosis regulator protein 2	yes	yes	2	0.0051912	53.683	11113000	0	11113000	0	0	0	10382000	0	0
CDENILWLDYK	11	0	1467.67	P52480;A0A1L1SU37;A0A1L1SQV8;A0A1L1SSN6;A0A1L1STV8	P52480	152	162	Pkm	Pyruvate kinase PKM	yes	no	2	0.00047936	102.55	307060000	136760000	135220000	35089000	0	136760000	126310000	16803000	0
CDKEFMWALK	10	1	1326.61	P62774;A0A0J9YV46	P62774	2	11	Mtpn	Myotrophin	yes	no	2	0.0070634	56.432	773270000	342180000	431090000	0	0	342180000	402700000	0	0
CELLYEGPPDDEAAMGIK	18	0	2006.9	P58252	P58252	369	386	Eef2	Elongation factor 2	yes	yes	2	0.00078452	50.207	54758000	0	0	0	54758000	0	0	0	27078000
CESGFIEELPEETR	14	0	1694.75	Q91YL2	Q91YL2	32	45	Rnf126	E3 ubiquitin-protein ligase RNF126	yes	yes	2	0.00074387	89.548	58650000	0	0	24426000	34224000	0	0	11696000	16924000
CFEKNEAIQAAHDSVAQEGQCR	22	1	2547.12	Q9R0P9	Q9R0P9	132	153	Uchl1	Ubiquitin carboxyl-terminal hydrolase isozyme L1	yes	yes	3;4	6.0821e-08	63.578	162500000	73113000	0	46636000	42755000	73113000	0	22332000	21142000
CFIVGADNVGSK	12	0	1265.61	P14869;D3YVM5	P14869	27	38	Rplp0	60S acidic ribosomal protein P0	yes	no	2	0.014632	50.108	79096000	79096000	0	0	0	79096000	0	0	0
CFSEENHEPLR	11	0	1416.61	Q9EQH3	Q9EQH3	640	650	Vps35	Vacuolar protein sorting-associated protein 35	yes	yes	3	0.029434	31.478	4400400	4400400	0	0	0	4400400	0	0	0
CGESGHLAK	9	0	957.434	P53996;A0A0N4SVS6	P53996	57	65	Cnbp	Cellular nucleic acid-binding protein	yes	no	2;3	0.0014444	107.66	19237000	0	19237000	0	0	0	17970000	0	0
CGESGHLAR	9	0	985.44	P53996;A0A0N4SVS6;Q9D548	P53996	162	170	Cnbp;Zcchc13	Cellular nucleic acid-binding protein	yes	no	2;3	3.0919e-09	180.93	540300000	209610000	330690000	0	0	209610000	308920000	0	0
CGETGHVAINCSK	13	0	1431.62	P53996;A0A0N4SVS6	P53996	141	153	Cnbp	Cellular nucleic acid-binding protein	yes	no	2	3.126e-05	117.14	504170000	154500000	171220000	88224000	90227000	154500000	159950000	42247000	44617000
CGGAGHIASDCK	12	0	1231.51	E9Q4Q2;D3YZC9;D3YZD0;Q64213;D3YVH4	E9Q4Q2	282	293	Sf1	Splicing factor 1	yes	no	2;3	0.00064583	89.698	81505000	7947900	73557000	0	0	7947900	68714000	0	0
CGHTNNLRPK	10	1	1195.59	E9QNP0;P62984	E9QNP0	219	228	Kxd1;Uba52	Ubiquitin-60S ribosomal protein L40;Ubiquitin;60S ribosomal protein L40	yes	no	3	0.0053273	63.734	30280000	0	0	14497000	15783000	0	0	6942100	7804800
CGLQFLGNVASR	12	0	1320.66	P28658	P28658	134	145	Atxn10	Ataxin-10	yes	yes	2	0.018855	43.512	0	0	0	0	0	0	0	0	0
CGNQAAIMELDDTLK	15	0	1677.77	P62715;P63330	P63330	269	283	Ppp2cb;Ppp2ca	Serine/threonine-protein phosphatase 2A catalytic subunit beta isoform;Serine/threonine-protein phosphatase 2A catalytic subunit alpha isoform	no	no	2	4.3455e-06	118.48	952340000	33156000	35470000	479290000	404410000	33156000	33135000	229510000	199980000
CGPMVLDALIK	11	0	1215.64	Q9CQA3	Q9CQA3	70	80	Sdhb	Succinate dehydrogenase [ubiquinone] iron-sulfur subunit, mitochondrial	yes	yes	2	0.012098	66.435	70089000	70089000	0	0	0	70089000	0	0	0
CGSLGNIHHKPGGGQVEVK	19	1	1972.99	B1AQW2	B1AQW2	271	289	Mapt	Microtubule-associated protein	no	no	2;3;4;5	2.224e-68	172.1	1659300000	229310000	70267000	653400000	706280000	229310000	65641000	312890000	349250000
CGVISPR	7	0	787.401	D3Z712;F8WJ41;P62245	D3Z712	72	78	Rps15a	40S ribosomal protein S15a	yes	no	2	0.031681	111.28	68988000	0	0	68988000	0	0	0	33035000	0
CGYAGSNFPEHIFPALVGR	19	0	2091	P61161	P61161	20	38	Actr2	Actin-related protein 2	yes	yes	3	0.019739	26.474	22815000	0	22815000	0	0	0	21313000	0	0
CHGVPLVTISR	11	0	1237.66	Q9EQF6	Q9EQF6	432	442	Dpysl5	Dihydropyrimidinase-related protein 5	yes	yes	2;3	0.00055416	93.649	171960000	76240000	95720000	0	0	76240000	89418000	0	0
CHTIMNCTQTCPK	13	0	1649.68	Q9CQA3	Q9CQA3	245	257	Sdhb	Succinate dehydrogenase [ubiquinone] iron-sulfur subunit, mitochondrial	yes	yes	3	0.0038749	47.915	7974300	0	7974300	0	0	0	7449300	0	0
CIALAQLLVEQNFPAIAIHR	20	0	2276.25	Q9Z1N5	Q9Z1N5	300	319	Ddx39b	Spliceosome RNA helicase Ddx39b	yes	yes	3;4	4.4309e-06	63.918	183180000	0	0	102790000	80395000	0	0	49221000	39755000
CILLSNLSNTSHAPK	15	0	1653.85	P19096;A0A0U1RNJ1	P19096	1464	1478	Fasn	Fatty acid synthase;[Acyl-carrier-protein] S-acetyltransferase;[Acyl-carrier-protein] S-malonyltransferase;3-oxoacyl-[acyl-carrier-protein] synthase;3-oxoacyl-[acyl-carrier-protein] reductase;3-hydroxyacyl-[acyl-carrier-protein] dehydratase;Enoyl-[acyl-carrier-protein] reductase;Oleoyl-[acyl-carrier-protein] hydrolase	yes	no	3	0.01452	48.704	18176000	18176000	0	0	0	18176000	0	0	0
CKDDEFTHLYTLIVRPDNTYEVK	23	2	2855.38	P14211	P14211	163	185	Calr	Calreticulin	yes	yes	4;5	2.0077e-37	149.37	1493900000	0	0	713220000	780720000	0	0	341530000	386060000
CKELGITALHIK	12	1	1381.78	P62264;D3YVF4;D3Z7I1	P62264	85	96	Rps14	40S ribosomal protein S14	yes	no	2;3;4	0.00083968	62.166	405530000	17561000	0	210460000	177510000	17561000	0	100780000	87780000
CLEEFELLGK	10	0	1236.61	Q8R1B4;M0QWV3	Q8R1B4	79	88	Eif3c;G730046D07Rik	Eukaryotic translation initiation factor 3 subunit C	yes	no	2	0.02655	53.166	0	0	0	0	0	0	0	0	0
CLELFSELAEDKENYKK	17	2	2115.02	P11499	P11499	412	428	Hsp90ab1	Heat shock protein HSP 90-beta	yes	yes	2;3;4	2.036e-36	128.9	1030300000	152920000	146740000	330130000	400540000	152920000	137080000	158080000	198070000
CLELFTELAEDKENYKK	17	2	2129.04	P07901	P07901	421	437	Hsp90aa1	Heat shock protein HSP 90-alpha	yes	yes	3;4	4.3589e-57	140.84	815360000	0	0	450690000	364670000	0	0	215820000	180330000
CLFQSPLFAK	10	0	1209.62	D3YUP1;Q9WVG6	D3YUP1	421	430	Carm1	Histone-arginine methyltransferase CARM1	yes	no	2	0.021088	62.2	67094000	28771000	38324000	0	0	28771000	35800000	0	0
CLHPLASETFVSK	13	0	1487.74	A2AEX8;A2AEX6;P97447;A2AEY1;A2AEY2;A2AEX7;A2AEY0	A2AEX8	87	99	Fhl1	Four and a half LIM domains protein 1	yes	no	3	0.001906	42.789	28365000	14579000	13787000	0	0	14579000	12879000	0	0
CLYASVLTAQPR	12	0	1377.71	P58252	P58252	728	739	Eef2	Elongation factor 2	yes	yes	2	0.0020517	72.928	273510000	130530000	142980000	0	0	130530000	133570000	0	0
CMQLTDFILK	10	0	1267.63	Q9CR57	Q9CR57	54	63	Rpl14	60S ribosomal protein L14	yes	yes	2	0.011389	81.594	67725000	0	0	36977000	30748000	0	0	17707000	15205000
CNEIISWLDK	10	0	1276.61	P63017;Q504P4	P63017	574	583	Hspa8	Heat shock cognate 71 kDa protein	yes	no	2	0.038834	53.597	67699000	0	67699000	0	0	0	63241000	0	0
CNEPAVWSQLAK	12	0	1401.67	Q5SXR6;Q68FD5	Q5SXR6	1106	1117	Cltc	Clathrin heavy chain;Clathrin heavy chain 1	yes	no	2	0.0017711	75.294	75989000	37338000	38651000	0	0	37338000	36106000	0	0
CNNVLYIR	8	0	1050.53	P62307	P62307	66	73	Snrpf	Small nuclear ribonucleoprotein F	yes	yes	2	3.5633e-14	170.17	62463000	0	0	39508000	22955000	0	0	18919000	11351000
CNVWILDGDLYHK	13	0	1631.78	Q8R1Q8;Q6PDL0;A0A1D5RMC1;A0A1D5RM94	Q8R1Q8	117	129	Dync1li1;Dync1li2	Cytoplasmic dynein 1 light intermediate chain 1;Cytoplasmic dynein 1 light intermediate chain 2	no	no	3	0.0060137	43.382	3937500	3937500	0	0	0	3937500	0	0	0
CPAPNLEGGPSVFIFPPNIK	20	0	2153.1	A0A075B5P3;A0A0A6YVP0;P01867	P01867	117	136	Ighg2b;Igh-3	Ig gamma-2B chain C region	no	no	2;3;4	8.0586e-07	83.226	40013000000	0	0	19555000000	20458000000	0	0	9364000000	10116000000
CPAPNLEGGPSVFIFPPNIKDVLMISLTPK	30	1	3250.71	A0A075B5P3;A0A0A6YVP0;P01867	P01867	117	146	Ighg2b;Igh-3	Ig gamma-2B chain C region	no	no	3	8.2972e-05	35.237	57226000	0	0	0	57226000	0	0	0	28298000
CPFTGNVSIR	10	0	1149.56	P62281;A0A1B0GRR3	P62281	60	69	Rps11	40S ribosomal protein S11	yes	no	2	5.3436e-28	180.45	270870000	65188000	67834000	63425000	74427000	65188000	63368000	30372000	36804000
CPLLKPWALTFSYGR	15	1	1807.94	A6ZI44;P05064;Q9CPQ9;A6ZI46;A6ZI47	A6ZI44	344	358	Aldoa;Aldoart1;Aldoart2	Fructose-bisphosphate aldolase;Fructose-bisphosphate aldolase A	yes	no	3	0.00032425	80.96	53295000	0	0	24833000	28462000	0	0	11891000	14074000
CPLLYQWHR	9	0	1271.62	F6RJV6;Q9JJK2	F6RJV6	239	247	Lancl2	LanC-like protein 2	yes	no	3	0.023751	49.418	19700000	19700000	0	0	0	19700000	0	0	0
CPNPTCENMNFSWR	14	0	1811.72	Q8CFQ9;P56959;G3UXT7;G3UZD2;Q91VQ2	Q8CFQ9	420	433	Fus	RNA-binding protein FUS	yes	no	2;3	8.8863e-05	106.29	5943500000	18314000	0	2898400000	3026700000	18314000	0	1387900000	1496700000
CPSIAAAIAAVNALHGR	17	0	1690.89	Q8VH51	Q8VH51	478	494	Rbm39	RNA-binding protein 39	yes	yes	3	5.373e-36	153.7	134460000	9444800	12008000	59087000	53922000	9444800	11218000	28294000	26664000
CPVTVCGDVHGQFHDLMELFR	21	0	2516.14	P62715;P63330	P63330	50	70	Ppp2cb;Ppp2ca	Serine/threonine-protein phosphatase 2A catalytic subunit beta isoform;Serine/threonine-protein phosphatase 2A catalytic subunit alpha isoform	no	no	3;4	8.2538e-08	72.086	225210000	0	0	162170000	63047000	0	0	77655000	31177000
CQHAAEIITDLLR	13	0	1538.79	A0A0G2JG00;Q3TUE1;A0A0G2JGW9;A0A0G2JFY5;Q3UUU2;Q91WJ8	A0A0G2JG00	327	339	Fubp1	Far upstream element-binding protein 1	yes	no	3	0.0001492	90.926	7845600	3067400	4778200	0	0	3067400	4463700	0	0
CQSLTEDLEFR	11	0	1396.63	P14733	P14733	199	209	Lmnb1	Lamin-B1	yes	yes	2	0.0014388	85.533	105960000	0	0	56408000	49549000	0	0	27012000	24502000
CQWSEADAPLAVVK	14	0	1572.76	S4R1M2;D3YXK2;Q80YR5	S4R1M2	303	316	Safb;Safb2	Scaffold attachment factor B1;Scaffold attachment factor B2	yes	no	2	0.015647	42.336	32810000	0	32810000	0	0	0	30650000	0	0
CSEGSFLLTTFPR	13	0	1513.72	Q99K48	Q99K48	210	222	Nono	Non-POU domain-containing octamer-binding protein	yes	yes	2	0.0003134	72.928	54315000	54315000	0	0	0	54315000	0	0	0
CSEGVFLLTTTPRPVIVEPLEQLDDEDGLPEK	32	1	3595.8	Q8VIJ6	Q8VIJ6	423	454	Sfpq	Splicing factor, proline- and glutamine-rich	yes	yes	3	0.0019218	31.252	61380000	0	0	61380000	0	0	0	29392000	0
CTGGEVGATSALAPK	15	0	1417.69	P35979	P35979	17	31	Rpl12	60S ribosomal protein L12	yes	yes	2	5.9385e-06	117.09	436910000	0	113920000	171310000	151670000	0	106420000	82035000	75002000
CTTDHISAAGPWLK	14	0	1555.75	Q99KI0	Q99KI0	592	605	Aco2	Aconitate hydratase, mitochondrial	yes	yes	3	0.041631	19.286	7107700	0	7107700	0	0	0	6639800	0	0
CTYLVLDEADR	11	0	1353.62	Q3U741;Q501J6;Q3TU25	Q3U741	240	250	Ddx17	Probable ATP-dependent RNA helicase DDX17	yes	no	2	0.00064963	99.653	49409000	0	0	49409000	0	0	0	23660000	0
CVFEMPNENDKLNDMEPSK	19	1	2295.98	Q9WV55	Q9WV55	128	146	Vapa	Vesicle-associated membrane protein-associated protein A	yes	yes	3	0.013876	33.308	24300000	0	24300000	0	0	0	22700000	0	0
CVICDSYVRPCTLVR	15	1	1896.9	P83870	P83870	30	44	Phf5a	PHD finger-like domain-containing protein 5A	yes	yes	3	0.0052231	46.3	83703000	41514000	42189000	0	0	41514000	39411000	0	0
CVICGGPGVSDAYYCK	16	0	1804.76	P83870	P83870	58	73	Phf5a	PHD finger-like domain-containing protein 5A	yes	yes	2	0.00089118	72.006	90892000	50340000	40551000	0	0	50340000	37882000	0	0
CVSTLLDLIQTK	12	0	1389.75	H3BIY9;Q9DBG3;H3BKM0;Q5SVG5;Q5SVG4;O35643	H3BIY9	391	402	Ap2b1;Ap1b1	AP complex subunit beta;AP-2 complex subunit beta;AP-1 complex subunit beta-1	yes	no	2	0.037576	41.283	138980000	0	0	0	138980000	0	0	0	68726000
CVVTAEDGTQSEATVNVK	18	0	1906.89	P13595;A0A0A6YY91;E9Q589;A0A0A6YWU2;A0A0A6YY47;E9QB01	P13595	96	113	Ncam1	Neural cell adhesion molecule 1	no	no	2	0.0076774	38.021	20612000	0	0	20612000	0	0	0	9870300	0
CVVVGDGAVGK	11	0	1059.54	Q3TLP8;P63001;Q05144;A0A2R8VH29;A0A1B0GSL4;G3UZM2;D3Z3L1;F2Z463;D3YX61;P84096;Q8R527;Q9ER71;P60764	Q3TLP8	6	16	Rac1;Rac2;Rhoj;Rhoq;Rhog;Rac3	Ras-related C3 botulinum toxin substrate 1;Ras-related C3 botulinum toxin substrate 2;Rho-related GTP-binding protein RhoG;Rho-related GTP-binding protein RhoQ;Rho-related GTP-binding protein RhoJ;Ras-related C3 botulinum toxin substrate 3	no	no	2	0.015526	53.756	40190000	0	0	0	40190000	0	0	0	19874000
CWELTTEGEEIAR	13	0	1592.71	E9PWY9;Q8C0C7	E9PWY9	60	72	Farsa	Phenylalanine--tRNA ligase alpha subunit	yes	no	2	0.020112	42.743	27655000	0	27655000	0	0	0	25834000	0	0
CYEMASHLR	9	0	1165.5	P62962	P62962	128	136	Pfn1	Profilin-1	yes	yes	2	0.0091183	96.253	43451000	21819000	21632000	0	0	21819000	20207000	0	0
CYSCGEFGHIQK	12	0	1484.62	P53996;A0A0N4SVS6	P53996	120	131	Cnbp	Cellular nucleic acid-binding protein	yes	no	3	0.021969	37.613	28746000	0	28746000	0	0	0	26854000	0	0
DAALATALGDKK	12	1	1172.64	P14733	P14733	147	158	Lmnb1	Lamin-B1	yes	yes	2;3	0.0010628	87.298	70343000	17535000	0	29895000	22914000	17535000	0	14315000	11331000
DAALMVTNDGATILK	15	0	1531.79	P80314;A0A1W2P7B7;A0A1W2P828;A0A1W2P6Q3;A0A1W2P871	P80314	58	72	Cct2	T-complex protein 1 subunit beta	yes	no	2	0.0008773	77.593	163330000	87830000	75500000	0	0	87830000	70530000	0	0
DAANLLNDALAIR	13	0	1368.74	Q5UE59;E9Q7C9;Q7TNF4;Q8CD76;A0A5F8MPZ2;O88447	Q5UE59	273	285	Klc1	Kinesin light chain 1	yes	no	2	0.0087831	50.284	23738000	0	0	0	23738000	0	0	0	11738000
DAASVDKVLELK	12	1	1286.71	F6VQH5;D3YTQ3;Q9Z130	F6VQH5	101	112	Hnrnpdl	Heterogeneous nuclear ribonucleoprotein D-like	yes	no	2	0.038202	42.743	18777000	0	0	18777000	0	0	0	8991500	0
DAEDAMDAMDGAVLDGR	17	0	1750.71	Q62093	Q62093	67	83	Srsf2	Serine/arginine-rich splicing factor 2	yes	yes	2;3	1.3705e-10	123.84	950980000	0	152450000	404090000	394440000	0	142410000	193500000	195050000
DAEGILEDLQSYR	13	0	1507.72	Q921M7;A0A2I3BQK1;A0A2I3BPH9;A0A2I3BRN5	Q921M7	45	57	Fam49b	Protein FAM49B	yes	no	2	0.00060361	94.297	18456000	0	0	18456000	0	0	0	8837900	0
DAFADAVQR	9	0	991.472	A0A3B2WCD8;Q3U0V1	A0A3B2WCD8	73	81	Khsrp	Far upstream element-binding protein 2	yes	no	2	0.0093718	73.248	0	0	0	0	0	0	0	0	0
DAGHPLYPFNDPY	13	0	1504.66	Q9JII6	Q9JII6	313	325	Akr1a1	Alcohol dehydrogenase [NADP(+)]	yes	yes	2	0.040402	37.722	27729000	27729000	0	0	0	27729000	0	0	0
DAGMQLQGYR	10	0	1137.52	P05202	P05202	171	180	Got2	Aspartate aminotransferase, mitochondrial	yes	yes	2	0.0049792	84.568	12467000	0	12467000	0	0	0	11647000	0	0
DAGQISGLNVLR	12	0	1241.67	P38647	P38647	207	218	Hspa9	Stress-70 protein, mitochondrial	yes	yes	2	0.025692	43.512	49273000	49273000	0	0	0	49273000	0	0	0
DAGTIAGLNVLR	12	0	1198.67	P63017;Q504P4	P63017	160	171	Hspa8	Heat shock cognate 71 kDa protein	yes	no	2	0.0020741	88.948	342990000	342990000	0	0	0	342990000	0	0	0
DAGTIAGLNVMR	12	0	1216.62	P20029	P20029	187	198	Hspa5	78 kDa glucose-regulated protein	yes	yes	2	0.00095225	66.27	237860000	0	70272000	83382000	84210000	0	65645000	39928000	41642000
DAHNALLDIQSSGR	14	0	1495.74	Q8R1B4	Q8R1B4	626	639	Eif3c	Eukaryotic translation initiation factor 3 subunit C	yes	yes	2	0.039322	34.378	10518000	0	10518000	0	0	0	9825600	0	0
DAILFPSFIHSQK	13	0	1501.79	P24270	P24270	157	169	Cat	Catalase	yes	yes	3	0.020062	35.204	3029700	3029700	0	0	0	3029700	0	0	0
DAIQNPNDIQLQEK	14	0	1624.81	Q8BHZ0	Q8BHZ0	64	77	Fam49a	Protein FAM49A	yes	yes	2	0.0014613	63.32	23400000	23400000	0	0	0	23400000	0	0	0
DALGALPDLR	10	0	1039.57	E9Q9N7;Q5RKR3;A0A1L1SVD6;A0A1L1SSI6;A0A1L1SSZ4	E9Q9N7	185	194	Islr2	Immunoglobulin superfamily containing leucine-rich repeat protein 2	yes	no	2	0.027555	56.258	2366000	2366000	0	0	0	2366000	0	0	0
DALNQAQQVER	11	0	1270.63	Q9Z0H8	Q9Z0H8	1000	1010	Clip2	CAP-Gly domain-containing linker protein 2	yes	yes	2	0.029704	51.445	17391000	0	17391000	0	0	0	16246000	0	0
DALSDLALHFLNK	13	0	1455.77	P80315;G5E839	P80315	307	319	Cct4	T-complex protein 1 subunit delta	yes	no	2;3	2.4032e-06	109.29	221020000	0	0	184580000	36447000	0	0	88385000	18023000
DANGNSFATR	10	0	1051.47	P62702	P62702	212	221	Rps4x	40S ribosomal protein S4, X isoform	yes	yes	2	0.0052929	82.749	13579000	5881200	7698000	0	0	5881200	7191200	0	0
DANNMPVTAR	10	0	1087.51	D3Z0Y2;Q6GT24	D3Z0Y2	99	108	Prdx6		yes	no	2	0.0048561	85.807	16337000	8297500	8039500	0	0	8297500	7510200	0	0
DAQDALVPR	9	0	983.504	A2AEC2;Q9DB24;Q8R0A5;Q8CCT4	A2AEC2	167	175	Tceal3;Tceal6;Tceal5	Transcription elongation factor A protein-like 3;Transcription elongation factor A protein-like 5	yes	no	2	0.01245	86.833	3347200	3347200	0	0	0	3347200	0	0	0
DAQMVHSNALNEDTQDELGDPR	22	0	2454.07	P55302	P55302	132	153	Lrpap1	Alpha-2-macroglobulin receptor-associated protein	yes	yes	3	0.0019284	22.7	31241000	31241000	0	0	0	31241000	0	0	0
DASGMLYNLASAIK	14	0	1452.73	A0A0G2JGQ6;Q9JLM8;A0A0G2JGH1;Q1EDH1;H7BX36;A0A0G2JE54;Q8CCN4;A0A0G2JEN4	A0A0G2JGQ6	487	500	Dclk1	Serine/threonine-protein kinase DCLK1	yes	no	2	0.0010357	77.64	56371000	14034000	0	0	42338000	14034000	0	0	20936000
DATNVGDEGGFAPNILENK	19	0	1959.92	P17182;Q6PHC1;B0QZL1	P17182	203	221	Eno1	Alpha-enolase;Enolase	yes	no	2;3	3.9821e-05	98.902	1322300000	454420000	434630000	250380000	182910000	454420000	406020000	119900000	90451000
DATSLNQAALYR	12	0	1321.66	P51660	P51660	494	505	Hsd17b4	Peroxisomal multifunctional enzyme type 2;(3R)-hydroxyacyl-CoA dehydrogenase;Enoyl-CoA hydratase 2	yes	yes	2	0.00090831	100.02	61046000	0	61046000	0	0	0	57027000	0	0
DAVHYGGWEHR	11	0	1325.59	Q8BHN3	Q8BHN3	559	569	Ganab	Neutral alpha-glucosidase AB	yes	yes	2	0.016274	53.327	80134000	0	0	39574000	40560000	0	0	18950000	20057000
DAVLLVFANK	10	0	1088.62	P84084;P84078;P61205	P84084	118	127	Arf5;Arf1;Arf3	ADP-ribosylation factor 5;ADP-ribosylation factor 1;ADP-ribosylation factor 3	no	no	2	0.0032241	96.253	44827000	18863000	25964000	0	0	18863000	24254000	0	0
DAVLNAWAEDVDLR	14	0	1585.77	P52480	P52480	476	489	Pkm	Pyruvate kinase PKM	yes	yes	2	0.0015954	73.781	123990000	59715000	41444000	0	22834000	59715000	38716000	0	11291000
DAVTYTEHAK	10	0	1133.54	P62806	P62806	69	78	Hist1h4a	Histone H4	yes	yes	2;3	1.1389e-08	138.1	4818200000	394000000	117740000	2367700000	1938800000	394000000	109990000	1133800000	958730000
DAYSGGAVNLYHVR	14	0	1520.74	O55234;Q8BTY5	O55234	226	239	Psmb5	Proteasome subunit beta type-5	yes	no	2	0.0053194	52.167	66843000	0	0	66843000	0	0	0	32009000	0
DCDLQEDEACYNCGR	15	0	1903.68	P53996	P53996	66	80	Cnbp	Cellular nucleic acid-binding protein	yes	yes	2	0.012235	41.399	49103000	49103000	0	0	0	49103000	0	0	0
DCEDPNPLIR	10	0	1227.56	H3BIY9;Q9DBG3;Q5SVG5;Q5SVG4;O35643;H3BJ06	H3BIY9	94	103	Ap2b1;Ap1b1	AP complex subunit beta;AP-2 complex subunit beta;AP-1 complex subunit beta-1	yes	no	2	0.0031107	116.25	96137000	26012000	27848000	0	42276000	26012000	26015000	0	20906000
DCEQAENWMAAR	12	0	1479.59	A3KGU5;A3KGU7;E9Q447;A3KGU9;P16546	A3KGU5	1433	1444	Sptan1	Spectrin alpha chain, non-erythrocytic 1	yes	no	2	0.0081903	55.461	44751000	22646000	22106000	0	0	22646000	20650000	0	0
DCGMGFR	7	0	841.321	P12025	P12025	48	54	Mdk	Midkine	yes	yes	2	0.021458	124.32	64397000	0	0	64397000	0	0	0	30837000	0
DCLHGIEAK	9	0	1041.49	Q8BTV2	Q8BTV2	398	406	Cpsf7	Cleavage and polyadenylation specificity factor subunit 7	yes	yes	2	0.0078083	98.233	60743000	0	0	33896000	26847000	0	0	16231000	13276000
DCMLGMEFSGR	11	0	1301.52	P19096;A0A0U1RNJ1	P19096	1589	1599	Fasn	Fatty acid synthase;[Acyl-carrier-protein] S-acetyltransferase;[Acyl-carrier-protein] S-malonyltransferase;3-oxoacyl-[acyl-carrier-protein] synthase;3-oxoacyl-[acyl-carrier-protein] reductase;3-hydroxyacyl-[acyl-carrier-protein] dehydratase;Enoyl-[acyl-carrier-protein] reductase;Oleoyl-[acyl-carrier-protein] hydrolase	yes	no	2	0.011442	51.927	19661000	0	19661000	0	0	0	18367000	0	0
DCTVEMPILK	10	0	1204.58	A0A0J9YUM4;A0A0J9YU62;O88712;A0A0J9YVI3;A0A0J9YUR5;A0A0J9YU66;E9Q0T4;E9PWQ9;Q91YZ2;P56546	A0A0J9YUM4	26	35	Ctbp1;Ctbp2	C-terminal-binding protein 1;C-terminal-binding protein 2	yes	no	2	0.013389	69.954	24679000	0	24679000	0	0	0	23055000	0	0
DDASKPVHLTAFLGYK	16	1	1760.91	P27659;A0A087WNS0;A0A087WQK0	P27659	35	50	Rpl3	60S ribosomal protein L3	yes	no	3;4	0.00074636	71.08	77814000	29940000	9226400	38648000	0	29940000	8618900	18507000	0
DDDIAALVVDNGSGMCK	17	0	1778.78	P60710;E9Q1F2;E9Q5F4;E9Q2D1	P60710	2	18	Actb	Actin, cytoplasmic 1;Actin, cytoplasmic 1, N-terminally processed	yes	no	2	2.8795e-05	98.902	570540000	191900000	136930000	116740000	124970000	191900000	127920000	55900000	61795000
DDGSWEVIEGYR	12	0	1424.62	P26443	P26443	125	136	Glud1	Glutamate dehydrogenase 1, mitochondrial	yes	yes	2	0.00063533	90.15	39633000	21725000	0	0	17908000	21725000	0	0	8855400
DDNMFQIGK	9	0	1066.48	P11031	P11031	60	68	Sub1	Activated RNA polymerase II transcriptional coactivator p15	yes	yes	2	0.012361	87.323	23521000	10050000	13471000	0	0	10050000	12584000	0	0
DDPMLLSSGR	10	0	1089.51	F7D432;E9PWE0;E0CYV0;P23506;F6V9F1	F7D432	170	179	Pcmt1	Protein-L-isoaspartate O-methyltransferase;Protein-L-isoaspartate(D-aspartate) O-methyltransferase	yes	no	2	0.031957	52.49	6726900	6726900	0	0	0	6726900	0	0	0
DDTLHETEDVKEAIR	15	1	1769.84	Q9CQB4;Q9D855	Q9CQB4	35	49	Uqcrb	Cytochrome b-c1 complex subunit 7	yes	no	3	0.0050897	36.445	31610000	14555000	17056000	0	0	14555000	15933000	0	0
DEGANAFFK	9	0	997.451	P48962	P48962	264	272	Slc25a4	ADP/ATP translocase 1	yes	yes	2	0.012068	88.942	47068000	25054000	22013000	0	0	25054000	20564000	0	0
DEILPTTPISEQK	13	0	1469.76	P62908	P62908	215	227	Rps3	40S ribosomal protein S3	yes	yes	2	0.0013529	64.297	803600000	307530000	338940000	77649000	79490000	307530000	316620000	37183000	39308000
DEQGALLLGHELQSLLK	17	0	1863.01	Q80Y32	Q80Y32	230	246	Hmgxb4		yes	yes	3	0.00012013	65.225	49576000	0	0	28632000	20944000	0	0	13711000	10357000
DESKEPIVEVR	11	1	1299.67	P13595;A0A0A6YY91;A0A0A6YY47;E9QB01	P13595	772	782	Ncam1	Neural cell adhesion molecule 1	no	no	2;3	0.00062394	87.298	286310000	22906000	56092000	138970000	68340000	22906000	52399000	66547000	33794000
DETEFYLGK	9	0	1100.5	O55142	O55142	37	45	Rpl35a	60S ribosomal protein L35a	yes	yes	2	0.040529	61.962	21393000	21393000	0	0	0	21393000	0	0	0
DETNYGIPQR	10	0	1191.55	P68040	P68040	48	57	Gnb2l1	Guanine nucleotide-binding protein subunit beta-2-like 1;Guanine nucleotide-binding protein subunit beta-2-like 1, N-terminally processed	yes	yes	2	2.0147e-10	148.38	416160000	156850000	94978000	66349000	97980000	156850000	88724000	31772000	48451000
DFASEVSNVLNK	12	0	1321.65	Q3UGN9;P70297;A2ARJ0	Q3UGN9	88	99	Stam	Signal transducing adapter molecule 1	yes	no	2	0.013327	53.683	6740900	0	6740900	0	0	0	6297100	0	0
DFAVSTVPVSGSSHLR	16	0	1657.84	Q99LD8;O08972	Q99LD8	158	173	Ddah2	N(G),N(G)-dimethylarginine dimethylaminohydrolase 2	yes	no	2;3	0.0018011	43.791	81575000	52973000	28601000	0	0	52973000	26718000	0	0
DFDFESANAQFNKEEIDREFHNK	23	2	2829.26	Q8K2F8;F6X2V9	Q8K2F8	294	316	Lsm14a	Protein LSM14 homolog A	yes	no	4;5	2.3275e-19	123.53	978660000	0	0	504010000	474650000	0	0	241350000	234720000
DFEELKAEEIDVAK	14	1	1634.8	P14873	P14873	836	849	Map1b	Microtubule-associated protein 1B;MAP1B heavy chain;MAP1 light chain LC1	yes	yes	2	0.000838	107.85	207830000	0	63071000	144760000	0	0	58918000	69321000	0
DFESHITNYK	10	0	1252.57	Q8R1B4;M0QWV3	Q8R1B4	151	160	Eif3c;G730046D07Rik	Eukaryotic translation initiation factor 3 subunit C	yes	no	2	0.037864	51.066	16160000	16160000	0	0	0	16160000	0	0	0
DFFQNFGNVVELR	13	0	1583.77	P97855	P97855	356	368	G3bp1	Ras GTPase-activating protein-binding protein 1	yes	yes	2	0.00048979	93.058	93880000	0	0	50370000	43509000	0	0	24120000	21515000
DFKPGDLIFAK	11	1	1249.67	Q99JF8;A2BI12;F6RB63	Q99JF8	4	14	Psip1	PC4 and SFRS1-interacting protein	yes	no	2;3	0.010662	48.698	81119000	0	0	0	81119000	0	0	0	40113000
DFLLKPELLR	10	1	1242.73	Q9Z1N5;Q8VDW0;D6RHT5	Q9Z1N5	49	58	Ddx39b;Ddx39a;Ddx39	Spliceosome RNA helicase Ddx39b;ATP-dependent RNA helicase DDX39A	yes	no	2;3	0.0013027	111.06	317930000	89214000	0	123920000	104790000	89214000	0	59340000	51820000
DFLTPPLLSVR	11	0	1256.71	P17426;A0A140LIG7	P17426	833	843	Ap2a1	AP-2 complex subunit alpha-1	yes	no	2	0.013565	58.676	11911000	11911000	0	0	0	11911000	0	0	0
DFMIQGGDFTR	11	0	1285.58	P24369	P24369	99	109	Ppib	Peptidyl-prolyl cis-trans isomerase B	yes	yes	2	7.2839e-20	155.07	952140000	62750000	53047000	432480000	403860000	62750000	49554000	207100000	199710000
DFMIQGGDPTGTGR	14	0	1450.65	Q9D0W5	Q9D0W5	59	72	Ppil1	Peptidyl-prolyl cis-trans isomerase-like 1	yes	yes	2	0.006632	50.284	41462000	18005000	23457000	0	0	18005000	21913000	0	0
DFNHINVELSLLGK	14	0	1597.85	A0A0G2JES3;P51410;A0A140T8T4;D3Z629;A0A0G2JFQ3;D3YZT0;S4R1R7	A0A0G2JES3	36	49	Rpl9;Rpl9-ps1	60S ribosomal protein L9	yes	no	2	0.0025141	75.819	69628000	0	0	32196000	37432000	0	0	15417000	18510000
DFTPAAQAAFQK	12	0	1293.64	A8DUK4;P02088;P02089	A8DUK4	122	133	Hbbt1;Hbb-b1;Hbb-b2	Hemoglobin subunit beta-1;Hemoglobin subunit beta-2	yes	no	2	0.00071609	97.431	2189200000	608810000	585630000	510530000	484210000	608810000	547080000	244470000	239440000
DFTPSGIAGAFR	12	0	1237.61	P56135;F8WHP8	P56135	28	39	Atp5j2	ATP synthase subunit f, mitochondrial	yes	no	2	0.00060099	107.15	365990000	115090000	152790000	0	98113000	115090000	142730000	0	48517000
DFTPVCTTELGR	12	0	1394.65	D3Z0Y2;Q6GT24;O08709;Q8BG37	D3Z0Y2	18	29	Prdx6;Prdx6b	Peroxiredoxin-6	yes	no	2	0.002291	69.979	74251000	0	74251000	0	0	0	69362000	0	0
DFTVSAMHGDMDQK	14	0	1580.66	P60843	P60843	296	309	Eif4a1	Eukaryotic initiation factor 4A-I	yes	yes	2;3	0.0014902	72.652	167450000	87983000	79464000	0	0	87983000	74233000	0	0
DFVNYLVR	8	0	1024.53	A0A087WPL5;E9QNN1;O70133;Q3UR42;A0A0R4J2C3	A0A087WPL5	64	71	Dhx9	ATP-dependent RNA helicase A	yes	no	2	0.0017749	126.24	50261000	15154000	0	19677000	15429000	15154000	0	9422600	7629600
DGAWGAFR	8	0	878.404	P19096;A0A0U1RNJ1	P19096	1501	1508	Fasn	Fatty acid synthase;[Acyl-carrier-protein] S-acetyltransferase;[Acyl-carrier-protein] S-malonyltransferase;3-oxoacyl-[acyl-carrier-protein] synthase;3-oxoacyl-[acyl-carrier-protein] reductase;3-hydroxyacyl-[acyl-carrier-protein] dehydratase;Enoyl-[acyl-carrier-protein] reductase;Oleoyl-[acyl-carrier-protein] hydrolase	yes	no	2	0.011079	90.986	50338000	19177000	20583000	0	10577000	19177000	19228000	0	5230500
DGEPIENEEEDDEKHIFSDDSSELTIR	27	1	3147.36	P13595;A0A0A6YY91;E9Q589;A0A0A6YWU2;A0A0A6YY47;E9QB01	P13595	250	276	Ncam1	Neural cell adhesion molecule 1	no	no	4	0.018686	23.223	881960000	0	0	438080000	443880000	0	0	209780000	219500000
DGIWKPTLVILR	12	1	1409.84	Q9R0Q6;A0A0G2JF52;D3YVI5	Q9R0Q6	83	94	Arpc1a	Actin-related protein 2/3 complex subunit 1A	yes	no	3	0.019937	43.897	28677000	10502000	18175000	0	0	10502000	16979000	0	0
DGLAFNALIHR	11	0	1225.66	A0A1L1SV25;P57780;E9Q2W9;D3Z761;D3Z0L8;Q91ZE6;E9PX29	A0A1L1SV25	195	205	Actn4;Sptbn4	Alpha-actinin-4	yes	no	2;3	0.00060799	68.735	47699000	0	0	29122000	18576000	0	0	13946000	9186000
DGLGGLPDIVR	11	0	1110.6	Q3U4W8;P56399;D3YYA5;D3Z4K7	Q3U4W8	134	144	Usp5	Ubiquitin carboxyl-terminal hydrolase;Ubiquitin carboxyl-terminal hydrolase 5	yes	no	2	0.00054328	101.46	52340000	7577300	0	44763000	0	7577300	0	21435000	0
DGMDNQGGYGSVGR	14	0	1411.58	D3YWT1;D3Z3N4	D3YWT1	273	286	Hnrnph3		yes	no	2	0.0015176	74.611	112210000	0	0	55837000	56374000	0	0	26738000	27877000
DGNVLLHEMQIQHPTASLIAK	21	0	2314.21	P80317;A0A571BEL9	P80317	59	79	Cct6a	T-complex protein 1 subunit zeta	yes	no	3;4	1.7597e-27	118.51	1842400000	120610000	107720000	823940000	790140000	120610000	100620000	394550000	390720000
DGPMKFEK	8	1	950.453	Q8K2F8;F6X2V9	Q8K2F8	286	293	Lsm14a	Protein LSM14 homolog A	yes	no	2	0.0006284	112.41	64802000	0	0	31347000	33455000	0	0	15011000	16543000
DGPNALTPPPTTPEWVK	17	0	1818.92	A0A0G2JGX4;Q8VCE0;Q6PIC6;D3YYN7;Q6PIE5	A0A0G2JGX4	78	94	Atp1a3;Atp1a2	Sodium/potassium-transporting ATPase subunit alpha-3;Sodium/potassium-transporting ATPase subunit alpha-2	no	no	2	0.012279	36.417	59865000	59865000	0	0	0	59865000	0	0	0
DGQAMLWDLNEGK	13	0	1475.67	P68040	P68040	213	225	Gnb2l1	Guanine nucleotide-binding protein subunit beta-2-like 1;Guanine nucleotide-binding protein subunit beta-2-like 1, N-terminally processed	yes	yes	2	0.00033533	85.813	684040000	304450000	379590000	0	0	304450000	354600000	0	0
DGQILPVPNVVVR	13	0	1404.81	Q8BK67	Q8BK67	319	331	Rcc2	Protein RCC2	yes	yes	2	0.020112	42.743	68798000	0	68798000	0	0	0	64268000	0	0
DGQVINETSQHHDDLE	16	0	1835.79	P20152	P20152	451	466	Vim	Vimentin	yes	yes	3	0.00061372	43.297	258730000	134010000	124710000	0	0	134010000	116500000	0	0
DGSASGTTLLEALDCILPPTRPTDKPLR	28	2	2993.55	P10126;D3YZ68	P10126	220	247	Eef1a1	Elongation factor 1-alpha 1	yes	no	3;4;5	7.5624e-19	114.92	1219300000	0	0	927480000	291810000	0	0	444130000	144300000
DGSVAIASKPR	11	1	1099.6	Q3UJQ9;Q9D0K2	Q3UJQ9	177	187	Oxct1	Succinyl-CoA:3-ketoacid-coenzyme A transferase;Succinyl-CoA:3-ketoacid coenzyme A transferase 1, mitochondrial	yes	no	2	9.6253e-08	135.71	47075000	0	16637000	0	30438000	0	15541000	0	15052000
DGTAGTPNLQLYDMK	15	0	1622.76	Q8BJW6;D3YZZ6	Q8BJW6	101	115	Eif2a	Eukaryotic translation initiation factor 2A;Eukaryotic translation initiation factor 2A, N-terminally processed	yes	no	2	0.013897	40.589	22640000	22640000	0	0	0	22640000	0	0	0
DGTGVVEFVR	10	0	1077.55	H7BX95;Q6PDM2;F7AI47	H7BX95	155	164	Srsf1	Serine/arginine-rich splicing factor 1	yes	no	2	1.1141e-19	168.27	207220000	0	0	98190000	109030000	0	0	47019000	53917000
DGVWNLQNEVTKERTAQCFLR	21	2	2563.26	Q99PV0	Q99PV0	1211	1231	Prpf8	Pre-mRNA-processing-splicing factor 8	yes	yes	7	0.042396	11.646	3741000	0	3741000	0	0	0	3494700	0	0
DGWPAMCIHGDK	12	0	1385.59	Q3U741;Q501J6;Q3TU25	Q3U741	362	373	Ddx17	Probable ATP-dependent RNA helicase DDX17	yes	no	3	0.032741	24.53	10848000	0	10848000	0	0	0	10134000	0	0
DGYAQILR	8	0	934.487	Q99KI0	Q99KI0	430	437	Aco2	Aconitate hydratase, mitochondrial	yes	yes	2	0.015221	107.66	74800000	33743000	41058000	0	0	33743000	38355000	0	0
DGYQQNFK	8	0	998.446	Q60865;A2BH47;F6YP03	Q60865	666	673	Caprin1	Caprin-1	yes	no	2	0.036437	83.614	291770000	0	0	134490000	157280000	0	0	64400000	77777000
DHASIQMNVAEVDR	14	0	1583.74	Q9CQR2	Q9CQR2	28	41	Rps21	40S ribosomal protein S21	yes	yes	2	0.0017273	62.408	151230000	72538000	78695000	0	0	72538000	73514000	0	0
DHGLEVLGLVR	11	0	1206.67	Q8VHN8;A0A2R8VH99;A0A087WSB5;A0A087WRE5;E9Q9G1;Q6P3D0	Q8VHN8	134	144	Nudt16l1;Nudt16;1700080E11Rik	Protein syndesmos;U8 snoRNA-decapping enzyme	yes	no	2;3	0.0019417	77.379	33780000	0	0	15563000	18217000	0	0	7452500	9008400
DHIMEIFSTYGK	12	0	1439.68	Q99M28	Q99M28	175	186	Rnps1	RNA-binding protein with serine-rich domain 1	yes	yes	2	3.9905e-12	133.23	185020000	0	0	88250000	96771000	0	0	42259000	47853000
DHKDNLEFFLTNLGK	15	1	1789.9	P19096;A0A0U1RNJ1	P19096	788	802	Fasn	Fatty acid synthase;[Acyl-carrier-protein] S-acetyltransferase;[Acyl-carrier-protein] S-malonyltransferase;3-oxoacyl-[acyl-carrier-protein] synthase;3-oxoacyl-[acyl-carrier-protein] reductase;3-hydroxyacyl-[acyl-carrier-protein] dehydratase;Enoyl-[acyl-carrier-protein] reductase;Oleoyl-[acyl-carrier-protein] hydrolase	yes	no	3	0.014132	28.546	14328000	14328000	0	0	0	14328000	0	0	0
DHPFGFVAVPTK	12	0	1313.68	Q8CFZ0;G3UYP0;P63280	Q8CFZ0	19	30	Ube2i	SUMO-conjugating enzyme UBC9	yes	no	3	0.0054275	39.006	9034600	0	9034600	0	0	0	8439800	0	0
DHQYQFLEDAVR	12	0	1519.71	Q62318	Q62318	240	251	Trim28	Transcription intermediary factor 1-beta	yes	yes	2	1.7334e-08	111.06	0	0	0	0	0	0	0	0	0
DICNDVLSLLEK	12	0	1417.71	P63101;A0A2I3BQ03	P63101	92	103	Ywhaz	14-3-3 protein zeta/delta	yes	no	3	0.00019895	78.324	46227000	0	0	24845000	21382000	0	0	11897000	10573000
DIDIHEVR	8	0	995.504	Q8VEK3	Q8VEK3	329	336	Hnrnpu	Heterogeneous nuclear ribonucleoprotein U	yes	yes	2;3	0.012713	113.5	512150000	81556000	89647000	190450000	150500000	81556000	83745000	91198000	74421000
DIEAMDPSILK	11	0	1230.62	P46460;G3UX86	P46460	151	161	Nsf	Vesicle-fusing ATPase	yes	no	2	0.0012934	82.749	19198000	0	19198000	0	0	0	17934000	0	0
DIEEIIDELK	10	0	1215.62	Q9D6J6	Q9D6J6	199	208	Ndufv2	NADH dehydrogenase [ubiquinone] flavoprotein 2, mitochondrial	yes	yes	2	0.0018886	101.11	15281000	0	0	9274500	6006600	0	0	4441200	2970300
DIELVMSQANVSR	13	0	1460.73	Q60817;P70670	Q60817	180	192	Naca	Nascent polypeptide-associated complex subunit alpha;Nascent polypeptide-associated complex subunit alpha, muscle-specific form	yes	no	2	0.0021419	80.763	29347000	0	29347000	0	0	0	27415000	0	0
DIHNIYGLYVHMATADGLIQR	21	0	2399.21	Q8BHN3	Q8BHN3	570	590	Ganab	Neutral alpha-glucosidase AB	yes	yes	3	1.9753e-08	89.028	59648000	0	0	59648000	0	0	0	28563000	0
DIICQIAYAR	10	0	1221.62	P47962;D3YYV8	P47962	59	68	Rpl5	60S ribosomal protein L5	yes	no	2	0.0049618	84.743	540500000	0	0	277410000	263090000	0	0	132840000	130100000
DIILPFR	7	0	872.512	Q3TWV4;P84091	Q3TWV4	280	286	Ap2m1	AP-2 complex subunit mu	yes	no	2	0.041225	106.29	13625000	0	0	13625000	0	0	0	6524500	0
DIKPENLLVYEHQDGSK	17	1	1983.99	A0A0G2JGQ6;Q9JLM8;A0A0G2JGH1;Q1EDH1;H7BX36;A0A0G2JE54;Q8CCN4;A0A0G2JEN4	A0A0G2JGQ6	511	527	Dclk1	Serine/threonine-protein kinase DCLK1	yes	no	4	0.00047277	35.625	9342600	0	9342600	0	0	0	8727500	0	0
DIKPQLELIEDEEK	14	1	1697.87	P14873	P14873	850	863	Map1b	Microtubule-associated protein 1B;MAP1B heavy chain;MAP1 light chain LC1	yes	yes	3	0.00042321	80.706	53323000	0	0	26103000	27219000	0	0	12500000	13460000
DIKPQLELIEDEEKLK	16	2	1939.05	P14873	P14873	850	865	Map1b	Microtubule-associated protein 1B;MAP1B heavy chain;MAP1 light chain LC1	yes	yes	3;4	0.000479	72.819	928520000	298160000	217380000	243110000	169860000	298160000	203070000	116420000	83995000
DIKPQNLLLDPDTAVLK	17	1	1892.06	E9QAQ5;Q9WV60	E9QAQ5	181	197	Gsk3b	Glycogen synthase kinase-3 beta	yes	no	3	0.035422	31.514	32538000	0	32538000	0	0	0	30396000	0	0
DILGASDPYVR	11	0	1204.61	P46935;V9GWV8;Q3V335;A0A571BEP7	P46935	94	104	Nedd4	E3 ubiquitin-protein ligase NEDD4	yes	no	2	0.015532	53.751	13480000	13480000	0	0	0	13480000	0	0	0
DILIQYDR	8	0	1034.54	P14131	P14131	110	117	Rps16	40S ribosomal protein S16	yes	yes	2	0.024019	98.299	26100000	13055000	13045000	0	0	13055000	12186000	0	0
DIMEDTIEDKLDTK	14	1	1664.78	O08599	O08599	484	497	Stxbp1	Syntaxin-binding protein 1	yes	yes	2	0.002215	62.408	40786000	0	0	40786000	0	0	0	19531000	0
DINQEVYNFLATAGAK	16	0	1752.87	Q99KI0	Q99KI0	145	160	Aco2	Aconitate hydratase, mitochondrial	yes	yes	2	0.00035834	79.492	32888000	0	0	17103000	15785000	0	0	8190100	7805400
DIPAYSQDTFK	11	0	1283.6	Q91YQ5	Q91YQ5	206	216	Rpn1	Dolichyl-diphosphooligosaccharide--protein glycosyltransferase subunit 1	yes	yes	2	0.0065461	62.303	30874000	30874000	0	0	0	30874000	0	0	0
DIPGLTDTTVPR	12	0	1283.67	P62754	P62754	120	131	Rps6	40S ribosomal protein S6	yes	yes	2	0.0006992	98.943	302630000	133100000	137660000	0	31866000	133100000	128600000	0	15758000
DIPNENELQFQIK	13	0	1586.79	H3BIY9;Q9DBG3;H3BKM0	H3BIY9	857	869	Ap2b1	AP complex subunit beta;AP-2 complex subunit beta	yes	no	2	0.0018308	90.15	57150000	0	0	57150000	0	0	0	27367000	0
DIQVIVNVPPTVQAR	15	0	1647.93	P13595;A0A0A6YY91;E9Q589;A0A0A6YWU2;A0A0A6YY47;E9QB01	P13595	203	217	Ncam1	Neural cell adhesion molecule 1	no	no	2	0.00083085	106.01	178300000	0	0	93911000	84386000	0	0	44970000	41729000
DISTNYYASQK	11	0	1288.59	P08113;F7C312	P08113	672	682	Hsp90b1	Endoplasmin	yes	no	2	0.0020076	75.294	249350000	0	28506000	0	220850000	0	26629000	0	109210000
DITVLDLGCGK	11	0	1189.6	Q9D0L8;D3YYS7;D3Z478	Q9D0L8	187	197	Rnmt	mRNA cap guanine-N7 methyltransferase	yes	no	2	0.00094165	94.692	48697000	26631000	22066000	0	0	26631000	20613000	0	0
DIVEAHYR	8	0	1001.49	P15105;D3YVK1	P15105	174	181	Glul	Glutamine synthetase	yes	no	2;3	0.016553	81.297	21305000	21305000	0	0	0	21305000	0	0	0
DIVENYFMR	9	0	1185.55	Q62318	Q62318	129	137	Trim28	Transcription intermediary factor 1-beta	yes	yes	2	2.9041e-06	141.78	186000000	0	0	84581000	101420000	0	0	40503000	50150000
DIVHSGLAYTMER	13	0	1490.72	P26443	P26443	504	516	Glud1	Glutamate dehydrogenase 1, mitochondrial	yes	yes	3	0.00076796	61.11	6507700	6507700	0	0	0	6507700	0	0	0
DIVQFVPFR	9	0	1119.61	Q9D6C8;Q8BLR2;A0A0R4J1D0;A0A0R4J0J1;Q3UYN2;Q8BT60;P59108;Q1RLL3;Q9Z140;Q0VE82;Q9DC53;Q8JZW4	Q9D6C8	419	427	Cpne4;Cpne6;Cpne3;Cpne2;Cpne9;Cpne7;Cpne8;Cpne5	Copine-4;Copine-3;Copine-2;Copine-9;Copine-6;Copine-7;Copine-8;Copine-5	yes	no	2	0.030637	79.116	44254000	18088000	26167000	0	0	18088000	24444000	0	0
DKDISWFSPNGEK	13	1	1521.71	P13595;A0A0A6YY91;E9Q589;A0A0A6YWU2;A0A0A6YY47;E9QB01	P13595	49	61	Ncam1	Neural cell adhesion molecule 1	no	no	2	0.0036822	56.548	69054000	0	0	69054000	0	0	0	33067000	0
DKEVTALTSQMDMLR	15	1	1736.84	Q9Z0H8	Q9Z0H8	837	851	Clip2	CAP-Gly domain-containing linker protein 2	yes	yes	3	0.0015367	47.545	28459000	13694000	14765000	0	0	13694000	13793000	0	0
DKFNECGHVLYADIK	15	1	1807.86	Q9D0E1	Q9D0E1	670	684	Hnrnpm	Heterogeneous nuclear ribonucleoprotein M	yes	yes	3	0.00025575	96.414	105250000	0	0	58655000	46597000	0	0	28087000	23042000
DKGFGFIR	8	1	938.497	Q99K48	Q99K48	110	117	Nono	Non-POU domain-containing octamer-binding protein	yes	yes	2	0.039705	94.006	14392000	14392000	0	0	0	14392000	0	0	0
DKGVLQDGEDVLVNVNMVDKER	22	2	2471.23	Q9Z315	Q9Z315	278	299	Sart1	U4/U6.U5 tri-snRNP-associated protein 1	yes	yes	3	0.029039	34.067	0	0	0	0	0	0	0	0	0
DKHVEEVR	8	1	1010.51	P54227	P54227	127	134	Stmn1	Stathmin	yes	yes	3	0.033318	68.224	4926900	4926900	0	0	0	4926900	0	0	0
DKLESEMEDAYHEHQANLLR	20	1	2427.11	Q8VIJ6	Q8VIJ6	509	528	Sfpq	Splicing factor, proline- and glutamine-rich	yes	yes	3;4;5	2.6024e-22	140.06	1412900000	392420000	458120000	265540000	296770000	392420000	427960000	127160000	146750000
DKLNNLVLFDK	11	1	1317.73	A0A1L1SQA8;P62852	A0A1L1SQA8	10	20	Rps25	40S ribosomal protein S25	yes	no	2;3	1.1735e-26	169.58	6451100000	429130000	584690000	2529600000	2907700000	429130000	546200000	1211300000	1437800000
DKPLKDVIIVDSGK	14	2	1525.87	P24369	P24369	191	204	Ppib	Peptidyl-prolyl cis-trans isomerase B	yes	yes	2;3	0.00041782	129.37	971740000	0	0	477380000	494360000	0	0	228600000	244460000
DKQVVSGQAAK	11	1	1129.61	Q7TSJ2;A0A140LIT9	Q7TSJ2	528	538	Map6	Microtubule-associated protein 6	yes	no	2;3	0.0014326	91.584	13418000	0	13418000	0	0	0	12534000	0	0
DKVTDGISK	9	1	961.508	A0A668KLC6;P20357;Q80X35;Q80ZL4;G3UZV6;Q3TLQ0;G3UZJ2;G3UWW1	A0A668KLC6	1691	1699	Map2	Microtubule-associated protein 2;Microtubule-associated protein	yes	no	2	0.015855	87.308	27531000	15413000	12118000	0	0	15413000	11320000	0	0
DKWLAPDGLIFPDR	14	1	1641.85	A0A171KXD3;Q9JIF0;A0A140LHF7;A0A140LJF4	A0A171KXD3	129	142	Prmt1	Protein arginine N-methyltransferase 1	yes	no	2;3	0.00089543	77.64	93728000	0	8935500	43069000	41723000	0	8347200	20624000	20632000
DLAADPLNRR	10	1	1139.6	Q9D7A8	Q9D7A8	23	32	Armc1	Armadillo repeat-containing protein 1	yes	yes	2;3	0.0040183	71.451	101690000	0	0	73109000	28580000	0	0	35009000	14133000
DLADELALVDVMEDK	15	0	1674.8	P06151;A0A1B0GSX0;D3YZQ9;A0A1B0GT41;A0A1B0GQX5;A0A1B0GSL7;A0A1B0GRC1;A0A1B0GRS2;A0A1B0GRW9;A0A1B0GS79	P06151	43	57	Ldha	L-lactate dehydrogenase A chain;L-lactate dehydrogenase	yes	no	2	9.4247e-05	85.288	41188000	0	0	21698000	19490000	0	0	10390000	9637700
DLAGALDEKELIEK	14	1	1542.81	F6QKK2;Q8VEH3	F6QKK2	112	125	Arl8a	ADP-ribosylation factor-like protein 8A	yes	no	2	0.0029529	60.434	63812000	28606000	35206000	0	0	28606000	32888000	0	0
DLAGCIHGLSNVK	13	0	1382.7	P54071	P54071	414	426	Idh2	Isocitrate dehydrogenase [NADP], mitochondrial	yes	yes	2;3	0.00050815	93.258	410470000	32377000	125970000	252120000	0	32377000	117680000	120730000	0
DLAPTGIR	8	0	841.466	Q99N15;A2AFQ2;O08756	Q99N15	185	192	Hsd17b10	3-hydroxyacyl-CoA dehydrogenase type-2	yes	no	2	0.030102	94.539	27427000	0	0	15500000	11927000	0	0	7422300	5897900
DLASVQALLR	10	0	1084.62	A3KGU5;A3KGU7;E9Q447;A3KGU9;P16546	A3KGU5	286	295	Sptan1	Spectrin alpha chain, non-erythrocytic 1	yes	no	2	0.0059096	81.548	6619900	3498800	3121200	0	0	3498800	2915700	0	0
DLATDLSLIEVK	12	0	1315.72	A0A668KLC6;P20357	A0A668KLC6	1070	1081	Map2	Microtubule-associated protein 2	yes	no	2	0.0010044	94.297	35243000	0	0	15641000	19603000	0	0	7489600	9693500
DLDKPFLLPVESVYSIPGR	19	1	2144.15	Q8BFR5;A0A0U1RNQ6	Q8BFR5	253	271	Tufm	Elongation factor Tu, mitochondrial	yes	no	3	0.0061177	36.856	68964000	0	0	32910000	36055000	0	0	15759000	17829000
DLDSLHSFVLR	11	0	1300.68	A0A0R4J1Y7;E9PXX7;Q91W90	A0A0R4J1Y7	307	317	Txndc5	Thioredoxin domain-containing protein 5	yes	no	3	0.0040316	57.348	18449000	9720400	8728700	0	0	9720400	8154100	0	0
DLEDKEGEIQAGAK	14	1	1501.73	A2BFF8;Q3TPJ8;A2BFF5;A2BFF9;O88487	A2BFF8	225	238	Dync1i2	Cytoplasmic dynein 1 intermediate chain 2	yes	no	2	1.3668e-08	123.8	85601000	0	0	41149000	44452000	0	0	19705000	21981000
DLEEDHACIPIK	12	0	1438.68	P58252	P58252	560	571	Eef2	Elongation factor 2	yes	yes	2;3	0.0019111	74.173	54337000	15436000	38902000	0	0	15436000	36341000	0	0
DLEEDHACIPIKK	13	1	1566.77	P58252	P58252	560	572	Eef2	Elongation factor 2	yes	yes	2;3;4	0.00022542	72.958	429160000	9524400	115460000	253040000	51140000	9524400	107860000	121170000	25289000
DLEEFFSTVGK	11	0	1270.61	Q8VH51;E9Q8F0;F7AA45;B7ZD61;B7ZD63	Q8VH51	168	178	Rbm39	RNA-binding protein 39	yes	no	2	0.0011172	91.584	211360000	54941000	0	79593000	76822000	54941000	0	38114000	37988000
DLEHAMLLR	9	0	1096.57	Q5F2E8	Q5F2E8	646	654	Taok1	Serine/threonine-protein kinase TAO1	yes	yes	3	0.023751	49.418	10830000	5507500	5322100	0	0	5507500	4971700	0	0
DLELFSNPFSFKPEYAPISVR	21	1	2455.24	Q8VEH5	Q8VEH5	485	505	Epm2aip1	EPM2A-interacting protein 1	yes	yes	3	0.0083736	22.902	145250000	0	0	0	145250000	0	0	0	71825000
DLFDPIIEER	10	0	1245.62	Q04447	Q04447	87	96	Ckb	Creatine kinase B-type	yes	yes	2	0.0032026	96.331	419320000	152860000	152740000	58243000	55478000	152860000	142690000	27890000	27434000
DLFQVAFNR	9	0	1108.57	Q9JHU4	Q9JHU4	3860	3868	Dync1h1	Cytoplasmic dynein 1 heavy chain 1	yes	yes	2	0.011581	91.626	21230000	9537300	11693000	0	0	9537300	10923000	0	0
DLFSDGHSEFLK	12	0	1393.65	P27773	P27773	162	173	Pdia3	Protein disulfide-isomerase A3	yes	yes	2;3	0.00022966	74.46	122800000	0	34119000	50167000	38515000	0	31873000	24023000	19046000
DLGATWVVLGHSER	14	0	1538.78	P17751;H7BXC3	P17751	86	99	Tpi1	Triosephosphate isomerase	yes	no	2;3	0.0003122	84.658	168070000	82323000	15502000	70241000	0	82323000	14481000	33636000	0
DLGEAALNEYLR	12	0	1362.68	Q8R0Y6	Q8R0Y6	883	894	Aldh1l1	Cytosolic 10-formyltetrahydrofolate dehydrogenase	yes	yes	2	0.0097147	66.056	44646000	0	0	0	44646000	0	0	0	22078000
DLGEIGGIIGTNDVK	15	0	1499.78	P28738	P28738	556	570	Kif5c	Kinesin heavy chain isoform 5C	yes	yes	2	0.0027369	56.783	49790000	26069000	0	0	23721000	26069000	0	0	11730000
DLHESSFSLSGSQIDDHVPK	20	0	2197.03	Q9EQF6	Q9EQF6	527	546	Dpysl5	Dihydropyrimidinase-related protein 5	yes	yes	3	8.9821e-06	53.779	80055000	80055000	0	0	0	80055000	0	0	0
DLHESSFSLSGSQIDDHVPKR	21	1	2353.13	Q9EQF6	Q9EQF6	527	547	Dpysl5	Dihydropyrimidinase-related protein 5	yes	yes	4;5	1.3733e-08	74.618	169830000	94592000	75236000	0	0	94592000	70283000	0	0
DLILQCLDDKDESIR	15	1	1831.9	O54774	O54774	343	357	Ap3d1	AP-3 complex subunit delta-1	yes	yes	3	0.0051271	40.801	20223000	20223000	0	0	0	20223000	0	0	0
DLIQMLVQR	9	0	1114.62	Q64511;F6XX57	Q64511	1081	1089	Top2b	DNA topoisomerase 2-beta	yes	no	2	0.017524	88.942	10905000	5402900	5502000	0	0	5402900	5139700	0	0
DLISHDELFSDIYK	14	0	1693.82	P63028	P63028	6	19	Tpt1	Translationally-controlled tumor protein	yes	yes	2;3	0.00093559	77.062	327890000	31764000	36448000	130000000	129680000	31764000	34048000	62250000	64125000
DLKDYFSK	8	1	1014.5	Q60668;F6ZV59;G5E8G0;G3X9W0;E9Q5B6;A0A0G2JFL4	Q60668	112	119	Hnrnpd	Heterogeneous nuclear ribonucleoprotein D0	yes	no	2;3	0.015004	114.19	38347000	0	0	0	38347000	0	0	0	18963000
DLKDYFTK	8	1	1028.52	Q80XR6;Q20BD0;Q99020	Q80XR6	90	97	Hnrnpab	Heterogeneous nuclear ribonucleoprotein A/B	yes	no	3	0.032537	71.349	23265000	0	0	0	23265000	0	0	0	11504000
DLKPSNLLLNTTCDLK	16	1	1843.97	P63085	P63085	147	162	Mapk1	Mitogen-activated protein kinase 1	yes	yes	3	0.02042	33.796	90457000	90457000	0	0	0	90457000	0	0	0
DLKPSTPR	8	1	912.503	Q61937;Q9DAY9;Q5SQB5	Q61937	212	219	Npm1	Nucleophosmin	yes	no	3	0.022463	78.192	0	0	0	0	0	0	0	0	0
DLLDLLVEAK	10	0	1127.64	Q62167;P16381;Q62095	Q62167	555	564	Ddx3x;D1Pas1;Ddx3y	ATP-dependent RNA helicase DDX3X;Putative ATP-dependent RNA helicase Pl10;ATP-dependent RNA helicase DDX3Y	yes	no	2	0.00074916	118.18	12544000	0	0	7926000	4617700	0	0	3795400	2283500
DLLFQALGR	9	0	1031.58	Q9WUA2;A0A087WS80;A0A087WQ15	Q9WUA2	9	17	Farsb	Phenylalanine--tRNA ligase beta subunit	yes	no	2	0.012068	88.942	24413000	13842000	10571000	0	0	13842000	9874900	0	0
DLLHPSPEEEK	11	0	1292.62	A0A0G2JDW7;Q6ZWU9;A0A0G2JG29	A0A0G2JDW7	4	14	Rps27	40S ribosomal protein S27	yes	no	3	0.033268	27.681	11155000	0	11155000	0	0	0	10421000	0	0
DLLHPSPEEEKR	12	1	1448.73	A0A0G2JDW7;Q6ZWU9;A0A0G2JG29	A0A0G2JDW7	4	15	Rps27	40S ribosomal protein S27	yes	no	3	0.0040958	47.712	5105100	5105100	0	0	0	5105100	0	0	0
DLLHPSPEEEKRK	13	2	1576.82	A0A0G2JDW7;Q6ZWU9;A0A0G2JG29	A0A0G2JDW7	4	16	Rps27	40S ribosomal protein S27	yes	no	3;4	0.0021492	63.989	86211000	0	0	86211000	0	0	0	41283000	0
DLMVGDEASELR	12	0	1333.62	P61161	P61161	54	65	Actr2	Actin-related protein 2	yes	yes	2	0.0026669	65.347	229010000	106760000	122250000	0	0	106760000	114200000	0	0
DLNQLFQQDSSSR	13	0	1536.72	V9GWT6;V9GXH3;F8VPM7;Q99MI1;V9GXF0;V9GXP8	V9GWT6	241	253	Erc1	ELKS/Rab6-interacting/CAST family member 1	yes	no	2	0.010903	48.284	28364000	0	28364000	0	0	0	26497000	0	0
DLNYCFSGMSDHR	13	0	1600.64	Q8C2Q7;O35737;P70333	Q8C2Q7	263	275	Hnrnph1;Hnrnph2	Heterogeneous nuclear ribonucleoprotein H;Heterogeneous nuclear ribonucleoprotein H, N-terminally processed;Heterogeneous nuclear ribonucleoprotein H2	yes	no	2;3	0.0004308	82.171	693980000	186720000	179120000	180790000	147340000	186720000	167330000	86573000	72859000
DLPEHAVLK	9	0	1020.56	Q8VEK3	Q8VEK3	603	611	Hnrnpu	Heterogeneous nuclear ribonucleoprotein U	yes	yes	2;3	0.011141	93.195	321940000	0	133100000	78969000	109870000	0	124340000	37815000	54330000
DLPSPIER	8	0	925.487	A0A075B5P3;A0A0A6YVP0;P01867	P01867	215	222	Ighg2b;Igh-3	Ig gamma-2B chain C region	no	no	2	0.00049418	130.77	35592000000	0	0	18221000000	17371000000	0	0	8725200000	8590100000
DLQGLTVEHAIDSFR	15	0	1699.85	Q9Z315	Q9Z315	253	267	Sart1	U4/U6.U5 tri-snRNP-associated protein 1	yes	yes	2;3	0.00066911	95.018	112980000	0	0	40141000	72843000	0	0	19222000	36021000
DLQHPNEFIR	10	0	1267.63	Q9JIF7	Q9JIF7	108	117	Copb1	Coatomer subunit beta	yes	yes	3	0.013694	50.353	6543300	6543300	0	0	0	6543300	0	0	0
DLQQQSEQLDSVLK	14	0	1629.82	I7HPB1;I7HFU4;B2FDF6;Q8R570	I7HPB1	139	152	Snap47	Synaptosomal-associated protein 47	yes	no	2	0.0063201	44.765	0	0	0	0	0	0	0	0	0
DLQQYQSQAK	10	0	1207.58	E9Q6R3;O08547;A0A0G2JF08	E9Q6R3	29	38	Sec22b	Vesicle-trafficking protein SEC22b	yes	no	2	0.029559	54.416	21366000	12736000	8629800	0	0	12736000	8061600	0	0
DLQVNVEHLVQK	12	0	1420.77	P47857	P47857	604	615	Pfkm	ATP-dependent 6-phosphofructokinase, muscle type	yes	yes	3	0.00086462	67.153	15291000	6244200	9046500	0	0	6244200	8450900	0	0
DLSAGAVSAVR	11	0	1044.56	Q8C0M9	Q8C0M9	103	113	Asrgl1	Isoaspartyl peptidase/L-asparaginase;Isoaspartyl peptidase/L-asparaginase alpha chain;Isoaspartyl peptidase/L-asparaginase beta chain	yes	yes	2	0.017498	62.823	12915000	6251100	6663500	0	0	6251100	6224800	0	0
DLSLEEIQK	9	0	1073.56	P54227;D3Z1Z8;D3Z5N2;P55821	P54227	44	52	Stmn1;Stmn2	Stathmin;Stathmin-2	no	no	2	1.7006e-05	133.12	143530000	64310000	79216000	0	0	64310000	74001000	0	0
DLSYCLSGMYDHR	13	0	1615.68	Q9Z2X1	Q9Z2X1	263	275	Hnrnpf	Heterogeneous nuclear ribonucleoprotein F;Heterogeneous nuclear ribonucleoprotein F, N-terminally processed	yes	yes	2	0.0063495	52.579	25100000	0	25100000	0	0	0	23447000	0	0
DLTDYLMK	8	0	997.479	P60710;E9Q1F2;E9Q5F4;G3UZ07;Q8BFZ3;A0A0U1RQ96;P63260;P68134;P68033;P63268;P62737;D3Z2K3;A0A494B9T3;D3YZY0	P63260	184	191	Actb;Actg1;Actbl2;Acta1;Actc1;Actg2;Acta2	Actin, cytoplasmic 1;Actin, cytoplasmic 1, N-terminally processed;Beta-actin-like protein 2;Actin, cytoplasmic 2;Actin, cytoplasmic 2, N-terminally processed;Actin, alpha skeletal muscle;Actin, alpha cardiac muscle 1;Actin, gamma-enteric smooth muscle;Actin, aortic smooth muscle	no	no	1	4.8626e-09	159.04	285740000	285740000	0	0	0	285740000	0	0	0
DLTEYLSR	8	0	995.492	F6VQH5;D3YTQ3;Q9Z130	F6VQH5	66	73	Hnrnpdl	Heterogeneous nuclear ribonucleoprotein D-like	yes	no	2	0.0016548	126.67	73896000	10847000	0	36031000	27018000	10847000	0	17254000	13360000
DLTGQVPTPPVK	12	0	1250.69	P14873	P14873	520	531	Map1b	Microtubule-associated protein 1B;MAP1B heavy chain;MAP1 light chain LC1	yes	yes	2	0.00017105	111.61	578260000	117400000	114440000	167130000	179300000	117400000	106900000	80031000	88662000
DLTSWVTEMK	10	0	1208.57	A3KGU5;A3KGU7;E9Q447;A3KGU9;P16546	A3KGU5	372	381	Sptan1	Spectrin alpha chain, non-erythrocytic 1	yes	no	2	0.040821	50.04	13116000	0	13116000	0	0	0	12252000	0	0
DLTTAGAVTQCYR	13	0	1454.68	A0A1D5RLW5;A0A1D5RM85;P62717;A0A1D5RME4	A0A1D5RLW5	70	82	Rpl18a	60S ribosomal protein L18a	yes	no	2	0.00094613	105.86	179710000	179710000	0	0	0	179710000	0	0	0
DLTTSSVEK	9	0	978.487	P14873	P14873	1846	1854	Map1b	Microtubule-associated protein 1B;MAP1B heavy chain;MAP1 light chain LC1	yes	yes	2	0.017524	78.334	8367100	0	0	0	8367100	0	0	0	4137500
DLYANTVLSGGTTMYPGIADR	21	0	2214.06	P60710;E9Q1F2;F8WGM8;P63260;B1ATY1	P63260	292	312	Actb;Actg1	Actin, cytoplasmic 1;Actin, cytoplasmic 1, N-terminally processed;Actin, cytoplasmic 2;Actin, cytoplasmic 2, N-terminally processed	no	no	2	0.00021516	44.511	146890000	34365000	0	56390000	56139000	34365000	0	27003000	27761000
DLYEDELVPLFEK	13	0	1608.79	Q8VHM5;A2AW41;F7B5B5	Q8VHM5	175	187	Hnrnpr		yes	no	2	0.0004546	91.937	144570000	0	0	74559000	70010000	0	0	35703000	34620000
DMELEHFDERDK	12	1	1562.67	A0A0G2JGQ6;Q9JLM8;Q80VB6;A0A0G2JGR9	A0A0G2JGQ6	6	17	Dclk1	Serine/threonine-protein kinase DCLK1	yes	no	3	0.00062562	72.958	19030000	9938200	9092000	0	0	9938200	8493400	0	0
DMHGDSEYNIMFGPDICGPGTK	22	0	2440.01	P14211	P14211	121	142	Calr	Calreticulin	yes	yes	2;3	5.2674e-08	90.707	522790000	0	0	254190000	268600000	0	0	121720000	132820000
DMLEASILDTYLGK	14	0	1567.78	P42932;H3BL49	P42932	491	504	Cct8	T-complex protein 1 subunit theta	yes	no	2	0.00053906	80.763	41933000	0	0	41933000	0	0	0	20080000	0
DMSPSAETEAPLAK	14	0	1445.67	P27546	P27546	515	528	Map4	Microtubule-associated protein 4	yes	yes	2	0.0077072	48.741	15701000	0	15701000	0	0	0	14668000	0	0
DMVGIAQTGSGK	12	0	1162.57	Q3U741;Q501J6;Q3TU25	Q3U741	131	142	Ddx17	Probable ATP-dependent RNA helicase DDX17	yes	no	2	0.00065805	89.171	69614000	0	0	69614000	0	0	0	33335000	0
DNALLAQLIQDK	12	0	1340.73	O08599	O08599	197	208	Stxbp1	Syntaxin-binding protein 1	yes	yes	2	0.029791	42.743	26597000	26597000	0	0	0	26597000	0	0	0
DNFTAIPEGTNGVEER	16	0	1747.8	Q3TT92;E9PWE8;Q62188	Q3TT92	344	359	Dpysl3	Dihydropyrimidinase-related protein 3	yes	no	2	0.0072534	42.556	167810000	0	167810000	0	0	0	156760000	0	0
DNFTLIPEGTNGTEER	16	0	1791.83	O08553	O08553	346	361	Dpysl2	Dihydropyrimidinase-related protein 2	yes	yes	2	0.0016114	57.019	218890000	105710000	113170000	0	0	105710000	105720000	0	0
DNFTLIPEGVNGIEER	16	0	1801.88	P97427;Q6P1J1;Q3TMU8;A0A0R4J1N0;O35098	Q6P1J1	460	475	Crmp1;Dpysl4	Dihydropyrimidinase-related protein 1;Dihydropyrimidinase-related protein 4	no	no	2	0.0011111	61.435	430220000	158300000	143660000	64335000	63928000	158300000	134200000	30807000	31612000
DNIQAMVIVPTR	12	0	1355.72	P54823	P54823	163	174	Ddx6	Probable ATP-dependent RNA helicase DDX6	yes	yes	2	0.01225	63.624	22647000	0	0	22647000	0	0	0	10845000	0
DNIQGITKPAIR	12	1	1324.75	P62806	P62806	25	36	Hist1h4a	Histone H4	yes	yes	2;3	1.7463e-07	123.63	7928700000	581390000	554260000	4099200000	2693900000	581390000	517760000	1962900000	1332100000
DNLAEDIMR	9	0	1075.5	P20152;A0A0A6YWC8	P20152	176	184	Vim	Vimentin	yes	no	2	1.26e-06	147.19	46978000	25051000	21927000	0	0	25051000	20484000	0	0
DNLEFFLTNLGK	12	0	1409.72	P19096;A0A0U1RNJ1	P19096	791	802	Fasn	Fatty acid synthase;[Acyl-carrier-protein] S-acetyltransferase;[Acyl-carrier-protein] S-malonyltransferase;3-oxoacyl-[acyl-carrier-protein] synthase;3-oxoacyl-[acyl-carrier-protein] reductase;3-hydroxyacyl-[acyl-carrier-protein] dehydratase;Enoyl-[acyl-carrier-protein] reductase;Oleoyl-[acyl-carrier-protein] hydrolase	yes	no	2	0.0025236	67.113	26626000	0	0	12942000	13685000	0	0	6197400	6767000
DNPGVVTCLDEAR	13	0	1444.66	Q02053	Q02053	227	239	Uba1	Ubiquitin-like modifier-activating enzyme 1	yes	yes	2	0.00030567	98.353	581910000	124270000	173910000	134280000	149450000	124270000	162460000	64300000	73905000
DNQSGSLLFIGR	12	0	1305.67	P19324	P19324	393	404	Serpinh1	Serpin H1	yes	yes	2	0.00069109	112.75	193950000	59083000	65796000	31644000	37425000	59083000	61464000	15153000	18507000
DNSTMGYMAAK	11	0	1187.5	P07901	P07901	622	632	Hsp90aa1	Heat shock protein HSP 90-alpha	yes	yes	2	0.016274	53.327	47354000	22862000	24491000	0	0	22862000	22879000	0	0
DNSTMGYMMAK	11	0	1247.5	P11499	P11499	613	623	Hsp90ab1	Heat shock protein HSP 90-beta	yes	yes	2	0.0043538	66.435	32960000	0	0	32960000	0	0	0	15783000	0
DNTINLIHTFR	11	0	1342.7	Q9CVB6;D3YXG6	Q9CVB6	238	248	Arpc2	Actin-related protein 2/3 complex subunit 2	yes	no	2;3	0.0014471	85.377	295690000	38259000	42160000	87018000	128250000	38259000	39384000	41669000	63421000
DNYVPEVSALDQEIIEVDPDTK	22	0	2488.19	P63276	P63276	82	103	Rps17	40S ribosomal protein S17	yes	yes	3	0.00051757	41.76	100580000	0	0	51050000	49530000	0	0	24446000	24492000
DPEGAGGAGVLAAGK	15	0	1268.64	Q7TSJ2;D3Z6W1;A0A140LIT9	Q7TSJ2	212	226	Map6	Microtubule-associated protein 6	yes	no	2	0.00023385	82.008	131090000	61052000	70036000	0	0	61052000	65425000	0	0
DPENFPFVVLGNK	13	0	1474.75	P51150	P51150	114	126	Rab7a	Ras-related protein Rab-7a	yes	yes	2	0.00030581	62.823	0	0	0	0	0	0	0	0	0
DPIPYLPPLEK	11	0	1280.7	Q62376;A0A1B0GRR8;A0A1B0GR69;A0A1B0GRV8	Q62376	17	27	Snrnp70	U1 small nuclear ribonucleoprotein 70 kDa	yes	no	2	0.0072319	61.65	138800000	0	0	0	138800000	0	0	0	68638000
DPNNLFMVR	9	0	1104.54	Q8VDM4	Q8VDM4	755	763	Psmd2	26S proteasome non-ATPase regulatory subunit 2	yes	yes	2	0.0098817	71.877	0	0	0	0	0	0	0	0	0
DPNRPRFTLQELR	13	2	1640.87	A0A0G2JFP1;A0A0G2JES6;Q9JJC6	A0A0G2JFP1	70	82	Rilpl1	RILP-like protein 1	yes	no	3	0.0062687	42.031	12159000	0	0	12159000	0	0	0	5822600	0
DPQALSEHLK	10	0	1136.58	Q60864	Q60864	514	523	Stip1	Stress-induced-phosphoprotein 1	yes	yes	2	0.0095902	74.376	33496000	18151000	15345000	0	0	18151000	14335000	0	0
DPSGAHPSVR	10	0	1021.49	Q60749	Q60749	22	31	Khdrbs1	KH domain-containing, RNA-binding, signal transduction-associated protein 1	yes	yes	2;3	1.2254e-13	154.56	893400000	175860000	149550000	302890000	265100000	175860000	139710000	145040000	131090000
DPTLDYHWDLWK	12	0	1587.74	F6WR04;O70370	F6WR04	30	41	Ctss	Cathepsin S	yes	no	2;3	0.0022055	62.14	78613000	0	0	40820000	37793000	0	0	19547000	18688000
DQDCDKFNQCGTCTEFK	17	1	2151.83	Q9WUU7	Q9WUU7	163	179	Ctsz	Cathepsin Z	yes	yes	2	0.013128	43.544	36631000	0	0	0	36631000	0	0	0	18114000
DQDVEPGAPSMGAK	14	0	1400.62	Q8CGC7	Q8CGC7	1464	1477	Eprs	Bifunctional glutamate/proline--tRNA ligase;Glutamate--tRNA ligase;Proline--tRNA ligase	yes	yes	2	0.018738	40.589	15257000	0	15257000	0	0	0	14252000	0	0
DQEWYDAEIAR	11	0	1394.61	F6UK66;A0A668KL36;Q810U5	F6UK66	172	182	Ccdc50	Coiled-coil domain-containing protein 50	yes	no	2	0.022838	52.79	12824000	12824000	0	0	0	12824000	0	0	0
DQFNSHIQLVR	11	0	1355.69	Q8BFU3	Q8BFU3	413	423	Rnf214	RING finger protein 214	yes	yes	3	0.021064	53.237	23438000	11479000	11960000	0	0	11479000	11172000	0	0
DQHDTFFLRDPAEALQLPMGYVQR	24	1	2846.38	E9PWY9;Q8C0C7	E9PWY9	272	295	Farsa	Phenylalanine--tRNA ligase alpha subunit	yes	no	4	4.4188e-10	58.974	38393000	0	0	38393000	0	0	0	18385000	0
DQITAGNAAR	10	0	1015.5	Q9DCL9;D3Z6P1;D6RCU8	Q9DCL9	37	46	Paics	Multifunctional protein ADE2;Phosphoribosylaminoimidazole-succinocarboxamide synthase;Phosphoribosylaminoimidazole carboxylase	yes	no	2	0.0054371	76.679	14200000	14200000	0	0	0	14200000	0	0	0
DQIYDIFQK	9	0	1168.58	P60843	P60843	194	202	Eif4a1	Eukaryotic initiation factor 4A-I	yes	yes	2	0.022254	73.248	14214000	0	14214000	0	0	0	13278000	0	0
DQLIVNLLK	9	0	1054.64	P06151;A0A1B0GSR9;A0A1B0GSX0;D3YZQ9;A0A1B0GT41;A0A1B0GQX5;A0A1B0GSL7;A0A1B0GRC1;A0A1B0GRS2;A0A1B0GRW9;A0A1B0GS79	P06151	6	14	Ldha	L-lactate dehydrogenase A chain;L-lactate dehydrogenase	yes	no	2	0.037241	64.265	9869400	0	9869400	0	0	0	9219600	0	0
DQLIVNLLKEEQAPQNK	17	1	1979.07	P06151;A0A1B0GSR9;A0A1B0GSX0;D3YZQ9;A0A1B0GT41;A0A1B0GQX5;A0A1B0GSL7;A0A1B0GRC1;A0A1B0GRS2;A0A1B0GRW9;A0A1B0GS79	P06151	6	22	Ldha	L-lactate dehydrogenase A chain;L-lactate dehydrogenase	yes	no	3	0.0021693	46.319	76568000	41485000	35084000	0	0	41485000	32774000	0	0
DQMQQQLSDYEQLLDVK	17	0	2079.98	P14733	P14733	352	368	Lmnb1	Lamin-B1	yes	yes	2;3	0.00034702	89.43	226700000	0	0	110150000	116550000	0	0	52747000	57634000
DQSAVVVQGLPEGVAFK	17	0	1742.92	G3UYD0;Q3UHU8;Q9ESZ8;G3UYJ6;G3UWV2	G3UYD0	144	160	Gtf2i	General transcription factor II-I	yes	no	2	0.00015303	106.26	338200000	0	0	338200000	0	0	0	161950000	0
DQTNDQVTIDSALATQK	17	0	1846.89	P54071;D6RIL6;A0A0U1RP68	P54071	90	106	Idh2	Isocitrate dehydrogenase [NADP], mitochondrial	yes	no	2	0.0068724	52.555	29625000	0	29625000	0	0	0	27674000	0	0
DQVANSAFVER	11	0	1234.59	P07901	P07901	501	511	Hsp90aa1	Heat shock protein HSP 90-alpha	yes	yes	2	0.00069144	98.943	645900000	104790000	86669000	454440000	0	104790000	80963000	217610000	0
DQYELLCLDNTR	12	0	1538.7	Q921I1	Q921I1	240	251	Tf	Serotransferrin	yes	yes	2	0.0077656	56.094	51202000	0	51202000	0	0	0	47831000	0	0
DRDVTFSPATIEEELIK	17	1	1961.99	Q80ZP8;Q3TMX5;Q9CXI5;F6USD5;F6T4L3	Q80ZP8	29	45	Manf	Mesencephalic astrocyte-derived neurotrophic factor	yes	no	3	0.0025318	33.697	28910000	0	0	0	28910000	0	0	0	14296000
DRDYSDHPSGGSYR	14	1	1610.67	A0A2I3BRL8;Q91VM5;S4R1F6	A0A2I3BRL8	266	279	Rbmxl1;Rbmx	RNA binding motif protein, X-linked-like-1	no	no	2;3	0.00029734	63.894	103190000	54776000	48415000	0	0	54776000	45227000	0	0
DREEALHQFR	10	1	1299.63	Q62167;P16381;Q62095	Q62167	479	488	Ddx3x;D1Pas1;Ddx3y	ATP-dependent RNA helicase DDX3X;Putative ATP-dependent RNA helicase Pl10;ATP-dependent RNA helicase DDX3Y	yes	no	3	0.041352	47.559	33285000	0	33285000	0	0	0	31093000	0	0
DRPFFPGLVK	10	1	1174.65	E9PZF0;Q01768	E9PZF0	172	181	Gm20390;Nme2	Nucleoside diphosphate kinase;Nucleoside diphosphate kinase B	yes	no	2;3	0.012437	74.165	269430000	145060000	124370000	0	0	145060000	116190000	0	0
DRPFFTGLVK	10	1	1178.64	Q5NC80;P15532;Q5NC79;E9PZF0	E9PZF0	57	66	Nme1;Gm20390	Nucleoside diphosphate kinase;Nucleoside diphosphate kinase A	no	no	3	0.041953	46.844	29348000	29348000	0	0	0	29348000	0	0	0
DRYDSFIELQEK	12	1	1541.74	Q9WUA2;A0A087WS80;A0A087WPV4	Q9WUA2	134	145	Farsb	Phenylalanine--tRNA ligase beta subunit	yes	no	2	0.031183	43.77	20470000	20470000	0	0	0	20470000	0	0	0
DSAIQQQVANLQMK	14	0	1572.79	Q9JHU4	Q9JHU4	1227	1240	Dync1h1	Cytoplasmic dynein 1 heavy chain 1	yes	yes	2	0.0012004	98.048	40664000	40664000	0	0	0	40664000	0	0	0
DSAVQSLR	8	0	874.451	Q3UUQ7	Q3UUQ7	796	803	Pgap1	GPI inositol-deacylase	yes	yes	2	0.0076804	114.78	0	0	0	0	0	0	0	0	0
DSCPLDCK	8	0	993.39	P84104	P84104	4	11	Srsf3	Serine/arginine-rich splicing factor 3	yes	yes	2	0.01861	101.64	33592000	0	0	15137000	18455000	0	0	7248500	9125800
DSDLSHVQNK	10	0	1141.54	G3UZI2;A0A0R4J259;G3V018;Q7TMK9;G3UXJ6;G3UWM1;G3XA76	G3UZI2	82	91	Syncrip	Heterogeneous nuclear ribonucleoprotein Q	yes	no	2;3	1.321e-14	160.74	131000000	0	12345000	58966000	59687000	0	11532000	28236000	29515000
DSDYYNMLLK	10	0	1260.57	H3BIY9;Q9DBG3;H3BKM0	H3BIY9	273	282	Ap2b1	AP complex subunit beta;AP-2 complex subunit beta	yes	no	2	0.0049153	85.212	54145000	0	0	27542000	26603000	0	0	13189000	13155000
DSEDVPMVLVGNK	13	0	1401.68	P32883	P32883	105	117	Kras	GTPase KRas;GTPase KRas, N-terminally processed	yes	yes	2	0.032723	39.622	24115000	0	0	0	24115000	0	0	0	11925000
DSELYQVFHACR	12	0	1523.68	Q9EQF6	Q9EQF6	171	182	Dpysl5	Dihydropyrimidinase-related protein 5	yes	yes	2;3	0.00023795	110.87	286490000	133870000	152620000	0	0	133870000	142580000	0	0
DSFDDRGPSLNPVLDYDHGSR	21	1	2361.06	Q8K310;A0A494BAZ2	Q8K310	187	207	Matr3	Matrin-3	yes	no	3;4	3.1692e-07	62.684	647740000	144550000	118610000	131220000	253370000	144550000	110800000	62835000	125290000
DSGNIPEAIASYR	13	0	1391.67	Q8CGY8	Q8CGY8	441	453	Ogt	UDP-N-acetylglucosamine--peptide N-acetylglucosaminyltransferase 110 kDa subunit	yes	yes	2	0.011317	47.894	58973000	22490000	36483000	0	0	22490000	34081000	0	0
DSGPPPSTVSEAEFEEIMKR	20	1	2205.03	Q8BTV2	Q8BTV2	324	343	Cpsf7	Cleavage and polyadenylation specificity factor subunit 7	yes	yes	3	8.421e-06	85.808	555400000	0	0	267860000	287530000	0	0	128270000	142180000
DSHGVAQVR	9	0	967.484	Q921R2;P62301	Q921R2	56	64	Rps13	40S ribosomal protein S13	yes	no	2;3	4.5522e-07	127.56	274160000	14384000	108910000	76762000	74105000	14384000	101740000	36758000	36645000
DSIVHQAGMLK	11	0	1197.62	Q9CVB6;D3YXG6	Q9CVB6	107	117	Arpc2	Actin-related protein 2/3 complex subunit 2	yes	no	2;3	0.00030931	107.15	108250000	58900000	49350000	0	0	58900000	46101000	0	0
DSLDPSFTHAMQLLSVEIEK	20	0	2259.11	Q60749	Q60749	112	131	Khdrbs1	KH domain-containing, RNA-binding, signal transduction-associated protein 1	yes	yes	2;3	3.5638e-05	52.298	123160000	0	0	0	123160000	0	0	0	60904000
DSLSFSNTNNK	11	0	1225.56	P98086	P98086	185	195	C1qa	Complement C1q subcomponent subunit A	yes	yes	2	0.004034	67.414	25909000	0	0	0	25909000	0	0	0	12812000
DSMIWDCTCIGAGR	14	0	1640.67	B9EHT6;A0A087WSN6;Q3UHL6;A0A087WR50;P11276;B7ZNJ1;A0A087WS56;Q4KL80	B9EHT6	118	131	Fn1	Fibronectin;Anastellin	yes	no	2	0.00054502	66.595	73469000	38830000	34639000	0	0	38830000	32358000	0	0
DSPLLLQQISAMR	13	0	1470.79	D3YX34;E9Q586;E9Q3M3;O08788	D3YX34	950	962	Dctn1	Dynactin subunit 1	yes	no	2	0.011295	60.518	22450000	0	22450000	0	0	0	20972000	0	0
DSPSVWAAVPGK	12	0	1212.61	P62962;Q5SX49;J3QMC2	P62962	27	38	Pfn1	Profilin-1;Profilin	yes	no	2	0.021249	72.042	117140000	0	117140000	0	0	0	109430000	0	0
DSTEQFQEYYR	11	0	1464.62	Q8CGF6	Q8CGF6	422	432	Wdr47	WD repeat-containing protein 47	yes	yes	2	0.03011	46.158	20817000	20817000	0	0	0	20817000	0	0	0
DSTLIMQLLR	10	0	1188.65	P61982;P63101;P68254;Q9CQV8;P68510;P62259	P62259	216	225	Ywhag;Ywhaz;Ywhaq;Ywhab;Ywhah;Ywhae	14-3-3 protein gamma;14-3-3 protein gamma, N-terminally processed;14-3-3 protein zeta/delta;14-3-3 protein theta;14-3-3 protein beta/alpha;14-3-3 protein beta/alpha, N-terminally processed;14-3-3 protein eta;14-3-3 protein epsilon	no	no	2	1.3746e-13	153.71	1040200000	57633000	0	511150000	471460000	57633000	0	244770000	233140000
DSTYSMSSTLTLTK	14	0	1533.72	P01837;A0A5H1ZRK8	P01837	63	76		Ig kappa chain C region	yes	no	2;3	8.2748e-07	111.86	40306000000	0	84711000	24673000000	15549000000	0	79134000	11815000000	7688800000
DSTYSMSSTLTLTKDEYER	19	1	2226	P01837;A0A5H1ZRK8	P01837	63	81		Ig kappa chain C region	yes	no	2;3	1.2686e-68	156.5	92338000000	0	389230000	46424000000	45524000000	0	363610000	22231000000	22512000000
DSYDSYATHNE	11	0	1300.48	P60824	P60824	162	172	Cirbp	Cold-inducible RNA-binding protein	yes	yes	2	0.0027486	71.349	224990000	0	49285000	0	175710000	0	46040000	0	86888000
DSYESYGNSR	10	0	1176.47	A0A2I3BRL8;Q91VM5;S4R1F6	A0A2I3BRL8	280	289	Rbmxl1;Rbmx	RNA binding motif protein, X-linked-like-1	no	no	2	0.0041578	92.838	49001000	23073000	25928000	0	0	23073000	24221000	0	0
DSYGGPPR	8	0	847.382	A0A2I3BRL8;Q91VM5	A0A2I3BRL8	185	192	Rbmxl1	RNA binding motif protein, X-linked-like-1	yes	no	2	0.035255	63.148	0	0	0	0	0	0	0	0	0
DSYVGDEAQSK	11	0	1197.52	P60710;E9Q5F4;G3UZ07;V9GXQ2;P63260;G3UYG0;E9Q606;P68134;P68033;P63268;P62737;A0A1D5RM20;D3Z2K3;A0A494B9T3;D3YZY0	P63260	51	61	Actb;Actg1;Gm17087;Acta1;Actc1;Actg2;Acta2	Actin, cytoplasmic 1;Actin, cytoplasmic 1, N-terminally processed;Actin, cytoplasmic 2;Actin, cytoplasmic 2, N-terminally processed;Actin, alpha skeletal muscle;Actin, alpha cardiac muscle 1;Actin, gamma-enteric smooth muscle;Actin, aortic smooth muscle	no	no	2	0.001252	89.047	125460000	60417000	65040000	0	0	60417000	60757000	0	0
DSYVGDEAQSKR	12	1	1353.62	P60710;E9Q5F4;G3UZ07;V9GXQ2;P63260;G3UYG0;E9Q606;P68134;P68033;P63268;P62737;A0A1D5RM20;D3Z2K3;A0A494B9T3;D3YZY0	P63260	51	62	Actb;Actg1;Gm17087;Acta1;Actc1;Actg2;Acta2	Actin, cytoplasmic 1;Actin, cytoplasmic 1, N-terminally processed;Actin, cytoplasmic 2;Actin, cytoplasmic 2, N-terminally processed;Actin, alpha skeletal muscle;Actin, alpha cardiac muscle 1;Actin, gamma-enteric smooth muscle;Actin, aortic smooth muscle	no	no	2;3	4.026e-05	109.42	1859600000	0	0	950810000	908820000	0	0	455300000	449410000
DTAPVLDSDGSYFIYSK	17	0	1876.87	A0A075B5P3;A0A0A6YVP0;P01867	P01867	281	297	Ighg2b;Igh-3	Ig gamma-2B chain C region	no	no	2	0.00016538	78.324	5752800000	0	0	2850600000	2902200000	0	0	1365000000	1435100000
DTASLSTTPSESPR	14	0	1447.68	A0JNY3;Q8BUV3	A0JNY3	295	308	Gphn	Gephyrin;Molybdopterin adenylyltransferase;Molybdopterin molybdenumtransferase	yes	no	2	0.0016158	69.65	48941000	25240000	0	0	23701000	25240000	0	0	11720000
DTDIVDEAIYYFK	13	0	1590.75	H7BWZ3;Q9JM76;A0A0G2JFK7;D3Z2F7;D3Z2F8	H7BWZ3	30	42	Arpc3	Actin-related protein 2/3 complex subunit 3	yes	no	2	0.0014098	65.224	72475000	0	0	41478000	30997000	0	0	19862000	15328000
DTDSEEEIREAFR	13	1	1595.71	P0DP28;P0DP27;P0DP26;A0A3Q4EHJ0;Q9D6P8;A0A1Y7VK66	P0DP28	79	91	Calml3	Calmodulin-like protein 3	yes	no	2;3	1.3732e-166	211.77	366410000	0	0	366410000	0	0	0	175460000	0
DTGILDSIGR	10	0	1045.54	A0A498WGS3;P04370	A0A498WGS3	33	42	Mbp	Myelin basic protein	yes	no	2	2.6357e-10	147.36	38853000	13464000	14385000	11004000	0	13464000	13438000	5269200	0
DTGKTPVEPEVAIHR	15	1	1647.86	P60867	P60867	5	19	Rps20	40S ribosomal protein S20	yes	yes	2;3;4	8.5444e-35	119.96	1088900000	209470000	265670000	353980000	259810000	209470000	248180000	169510000	128480000
DTLQSELVGQLYK	13	0	1492.78	E9PUD2;Q8K1M6;A0A2U3TZ67	E9PUD2	656	668	Dnm1l	Dynamin-1-like protein	yes	no	2	0.011626	47.603	13681000	13681000	0	0	0	13681000	0	0	0
DTNGSQFFITTVK	13	0	1456.72	P24369	P24369	146	158	Ppib	Peptidyl-prolyl cis-trans isomerase B	yes	yes	2	0.00044705	99.283	978000000	0	0	508840000	469150000	0	0	243660000	232000000
DTSFEQHVLLHTGGK	15	0	1667.83	P19096;A0A0U1RNJ1	P19096	1718	1732	Fasn	Fatty acid synthase;[Acyl-carrier-protein] S-acetyltransferase;[Acyl-carrier-protein] S-malonyltransferase;3-oxoacyl-[acyl-carrier-protein] synthase;3-oxoacyl-[acyl-carrier-protein] reductase;3-hydroxyacyl-[acyl-carrier-protein] dehydratase;Enoyl-[acyl-carrier-protein] reductase;Oleoyl-[acyl-carrier-protein] hydrolase	yes	no	3	0.00031537	77.754	31558000	15766000	15792000	0	0	15766000	14752000	0	0
DTSNHFHVFVGDLSPEITTEDIK	23	0	2600.24	Q8CII5;G5E8L2;Q80ZW7;A0A0N4SUX1;A0A0U1RPB0;Q921W2;D3Z3Y4;P70318;D6RGU1	Q8CII5	90	112	Tia1;Tial1	Nucleolysin TIAR	no	no	3	0.0016092	36.256	79166000	0	0	30572000	48595000	0	0	14639000	24030000
DTSSSTVVSTQR	12	0	1266.61	D3Z4H6;P52912;D3YY02	D3Z4H6	90	101	Tia1	Nucleolysin TIA-1	yes	no	2	0.0029423	63.283	24061000	9691300	14370000	0	0	9691300	13424000	0	0
DTYVSSFPR	9	0	1070.5	E9PYD5;P10711	E9PYD5	135	143	Tcea1	Transcription elongation factor A protein 1	yes	no	2	0.03376	66.351	4851000	0	4851000	0	0	0	4531600	0	0
DVACGANHTLVLDSQK	16	0	1726.83	Q8BK67	Q8BK67	332	347	Rcc2	Protein RCC2	yes	yes	2;3	0.00030233	59.862	156460000	78107000	78357000	0	0	78107000	73198000	0	0
DVACGANHTLVLDSQKR	17	1	1882.93	Q8BK67	Q8BK67	332	348	Rcc2	Protein RCC2	yes	yes	3;4	6.9158e-05	65.716	100910000	12666000	88244000	0	0	12666000	82435000	0	0
DVAGDASESALLK	13	0	1274.64	A0A0G2JGX4;Q8VCE0;Q6PIC6	A0A0G2JGX4	449	461	Atp1a3	Sodium/potassium-transporting ATPase subunit alpha-3	yes	no	2	0.0035529	69.01	68143000	0	68143000	0	0	0	63656000	0	0
DVAIKEPLVDVVDPK	15	1	1635.91	A0A171KXD3;Q9JIF0;A0A140LHF7	A0A171KXD3	176	190	Prmt1	Protein arginine N-methyltransferase 1	yes	no	2;3	0.0034843	61.344	502590000	10641000	11664000	226670000	253620000	10641000	10896000	108540000	125420000
DVDEVSSLLR	10	0	1131.58	P42932;H3BLL1;H3BKG2	P42932	156	165	Cct8	T-complex protein 1 subunit theta	yes	no	2	0.0022472	99.802	133880000	35528000	41604000	0	56747000	35528000	38865000	0	28061000
DVDFELIKVEGK	12	1	1390.73	P80316;E0CZA1	P80316	203	214	Cct5	T-complex protein 1 subunit epsilon	yes	no	2;3	0.0021215	76.228	80578000	0	0	57322000	23256000	0	0	27449000	11500000
DVEETGITVASVER	14	0	1503.74	Q3TIV5	Q3TIV5	341	354	Zc3h15	Zinc finger CCCH domain-containing protein 15	yes	yes	2	0.004041	54.471	78514000	0	29498000	26186000	22830000	0	27556000	12539000	11290000
DVEREDIEFICK	12	1	1551.72	P80315;G5E839	P80315	327	338	Cct4	T-complex protein 1 subunit delta	yes	no	2	0.0054334	61.353	86754000	0	86754000	0	0	0	81043000	0	0
DVIEEYFK	8	0	1041.5	Q6ZWZ6;F7AEH4;A0A1W2P7A1;P63323	Q6ZWZ6	122	129	Rps12	40S ribosomal protein S12	yes	no	2	0.038014	79.116	59729000	27860000	31869000	0	0	27860000	29771000	0	0
DVKPDNFLMGLGK	13	1	1432.74	A8Y2Z9;A0A2R8W6S2;F7A4U8;Q3TYE1;Q3USK2;Q9DC28;Q9JMK2	A8Y2Z9	128	140	Csnk1e;Csnk1d	Casein kinase I isoform delta;Casein kinase I isoform epsilon	yes	no	3	0.012404	44.616	4010100	0	4010100	0	0	0	3746100	0	0
DVLMISLTPK	10	0	1115.63	A0A075B5P3;A0A0A6YVP0;P01867	P01867	137	146	Ighg2b;Igh-3	Ig gamma-2B chain C region	no	no	1;2;3	1.7963e-08	135.79	83609000000	0	0	42124000000	41485000000	0	0	20171000000	20514000000
DVNAAIATIK	10	0	1014.57	P05213;P68369;P05214	P68369	327	336	Tuba1b;Tuba1a;Tuba3a	Tubulin alpha-1B chain;Tubulin alpha-1A chain;Tubulin alpha-3 chain	no	no	2;3	3.2292e-05	122.28	2983400000	1039500000	954330000	521300000	468290000	1039500000	891500000	249630000	231570000
DVNQQEFVR	9	0	1133.55	Q9CZX8;D3YUT3;D3Z5R8;D3Z722;D3YUG3;S4R223	Q9CZX8	8	16	Rps19	40S ribosomal protein S19	yes	no	2	1.2829e-09	159.04	490220000	240370000	249860000	0	0	240370000	233410000	0	0
DVQIGDIVTVGECRPLSK	18	1	1985.03	P62281;A0A1B0GSE8	P62281	119	136	Rps11	40S ribosomal protein S11	yes	no	2;3	0.00010869	92.457	800850000	52265000	0	491890000	256690000	52265000	0	235550000	126930000
DVQMLQDAISK	11	0	1246.62	Q61081	Q61081	314	324	Cdc37	Hsp90 co-chaperone Cdc37;Hsp90 co-chaperone Cdc37, N-terminally processed	yes	yes	2	0.010678	58.37	25352000	25352000	0	0	0	25352000	0	0	0
DVSTTLNADEAVAR	14	0	1460.71	E9Q0U7;Q61699	E9Q0U7	320	333	Hsph1	Heat shock protein 105 kDa	yes	no	2	0.0010883	48.004	0	0	0	0	0	0	0	0	0
DVTCDVHYENYR	12	0	1569.65	A0A338P6R8;A0A338P769;B7ZNM7;Q9Z2Q6	A0A338P6R8	306	317	Sept5	Septin-5	yes	no	2	0.022353	44.863	20493000	20493000	0	0	0	20493000	0	0	0
DVTNNVHYENYR	12	0	1522.68	E9Q9F5;E9Q1G8;O55131	E9Q9F5	299	310	Sept7	Septin-7	yes	no	2;3	0.00059578	91.855	61033000	0	0	31061000	29972000	0	0	14874000	14821000
DVVVDLVCYR	10	0	1236.62	Z4YJV4;Q60597;B2RXT3;E9Q7L0	Z4YJV4	496	505	Ogdh;Ogdhl	2-oxoglutarate dehydrogenase, mitochondrial	yes	no	2	0.022423	60.973	5614300	5614300	0	0	0	5614300	0	0	0
DWHRPCLR	8	1	1138.55	Q9DCT8;A0A0G2JF37	Q9DCT8	145	152	Crip2	Cysteine-rich protein 2	yes	no	3	0.031778	69.998	45620000	0	45620000	0	0	0	42616000	0	0
DWVLNEFK	8	0	1049.52	Q8BTS0;Q61656;S4R1I6	Q8BTS0	381	388	Ddx5	Probable ATP-dependent RNA helicase DDX5	yes	no	2	0.034979	87.323	36921000	14184000	22738000	0	0	14184000	21241000	0	0
DWVLNEFR	8	0	1077.52	Q3U741;Q501J6;Q3TU25	Q3U741	379	386	Ddx17	Probable ATP-dependent RNA helicase DDX17	yes	no	2	0.027556	100.19	49783000	23070000	26713000	0	0	23070000	24954000	0	0
DYAAYNVLDDPELR	14	0	1652.77	A0A1Y7VN70;Q80Y14	A0A1Y7VN70	80	93	Glrx5	Glutaredoxin-related protein 5, mitochondrial	yes	no	2	0.00248	69.349	28729000	0	28729000	0	0	0	26838000	0	0
DYDDMSPR	8	0	997.381	B2M1R6;P61979;H3BKD0;H3BLL4;H3BLP7	B2M1R6	255	262	Hnrnpk	Heterogeneous nuclear ribonucleoprotein K	yes	no	2	0.00049418	130.77	51292000	11029000	10269000	15863000	14130000	11029000	9593300	7596300	6987300
DYEEIGPSICR	11	0	1337.59	Q99JY9	Q99JY9	399	409	Actr3	Actin-related protein 3	yes	yes	2	0.0050519	64.297	167290000	0	52446000	52397000	62444000	0	48993000	25091000	30878000
DYFEEYGK	8	0	1049.43	O88569;A0A0N4SUM2	O88569	130	137	Hnrnpa2b1	Heterogeneous nuclear ribonucleoproteins A2/B1	yes	no	2	0.038014	79.116	208660000	51870000	52521000	59007000	45258000	51870000	49063000	28256000	22380000
DYFEEYGKIDTIEIITDR	18	1	2219.06	O88569;A0A0N4SUM2	O88569	130	147	Hnrnpa2b1	Heterogeneous nuclear ribonucleoproteins A2/B1	yes	no	3	0.0055856	41.912	0	0	0	0	0	0	0	0	0
DYFEQYGK	8	0	1048.45	Q5EBP8;P49312	Q5EBP8	123	130	Hnrnpa1	Heterogeneous nuclear ribonucleoprotein A1;Heterogeneous nuclear ribonucleoprotein A1, N-terminally processed	yes	no	2	0.025556	81.297	146390000	77621000	68774000	0	0	77621000	64246000	0	0
DYFFALAHTVR	11	0	1338.67	Q8CI94	Q8CI94	51	61	Pygb	Glycogen phosphorylase, brain form	yes	yes	2	0.026896	47.823	13074000	0	13074000	0	0	0	12213000	0	0
DYFNVPYPLPK	11	0	1351.68	F6QYF8;Q11011;E9Q039;E9Q6F4;F7ANF4	F6QYF8	251	261	Npepps	Puromycin-sensitive aminopeptidase	yes	no	2	0.012548	50.878	0	0	0	0	0	0	0	0	0
DYIWNTLNSGR	11	0	1337.64	Q9CZU6	Q9CZU6	330	340	Cs	Citrate synthase, mitochondrial	yes	yes	2	1.7214e-07	127.4	499780000	0	119170000	188190000	192420000	0	111320000	90119000	95149000
DYLHLPPEIVPATLR	15	0	1732.95	A0A3B2W864;A0A338P7K4;Q3UW83;A0A338P731;P63325	P63325	81	95	Rps10	40S ribosomal protein S10	no	no	2;3	5.8082e-05	94.717	790430000	59987000	52042000	409510000	268900000	59987000	48616000	196100000	132970000
DYMDTLPPTVGDDVGK	16	0	1721.78	H3BJ30;H3BJW3;Q6NVF9;H3BLM9	H3BJ30	51	66	Cpsf6	Cleavage and polyadenylation specificity factor subunit 6	yes	no	2	0.012461	48.004	24488000	0	0	0	24488000	0	0	0	12109000
DYPLPDVAHVTMLSASQK	18	0	1970.98	P19783	P19783	43	60	Cox4i1	Cytochrome c oxidase subunit 4 isoform 1, mitochondrial	yes	yes	2	7.6653e-05	68.809	89609000	0	0	44681000	44927000	0	0	21396000	22216000
DYQDNKADVILK	12	1	1420.72	Q8BMJ3	Q8BMJ3	83	94	Eif1ax	Eukaryotic translation initiation factor 1A, X-chromosomal	no	no	2	0.0011488	99.752	396430000	0	0	186650000	209770000	0	0	89381000	103730000
DYQGPLKEHEVTIFVR	16	1	1929.99	Q3V117;Q91V92;Q3TS02	Q3V117	363	378	Acly	ATP-citrate synthase	yes	no	3	0.00073888	63.631	58648000	0	0	58648000	0	0	0	28084000	0
DYSGSQGGYDR	11	0	1203.48	O89086	O89086	131	141	Rbm3	RNA-binding protein 3	yes	yes	2	0.0016673	81.338	32550000	15800000	16750000	0	0	15800000	15647000	0	0
DYTRPDLPSGDGQPALDPAIAAAFAK	26	1	2656.31	Q91Z31;A0A0G2JGW0;A0A0G2JFV8	Q91Z31	271	296	Ptbp2	Polypyrimidine tract-binding protein 2	yes	no	3	0.0013548	38.512	89564000	0	0	39382000	50182000	0	0	18858000	24815000
DYTYEELLNR	10	0	1314.61	Q99L45	Q99L45	171	180	Eif2s2	Eukaryotic translation initiation factor 2 subunit 2	yes	yes	2	0.0051643	93.551	88642000	37277000	51365000	0	0	37277000	47983000	0	0
DYYINIR	7	0	955.476	O35286;Q497W9	O35286	684	690	Dhx15	Pre-mRNA-splicing factor ATP-dependent RNA helicase DHX15	yes	no	2	0.034353	109.88	9225400	9225400	0	0	0	9225400	0	0	0
EAAALGSHGSCSSEVEK	17	0	1717.76	Q9CR51	Q9CR51	59	75	Atp6v1g1	V-type proton ATPase subunit G 1	yes	yes	3	0.019809	23.562	5800900	5800900	0	0	0	5800900	0	0	0
EAAENSLVAYK	11	0	1193.59	P62259	P62259	143	153	Ywhae	14-3-3 protein epsilon	yes	yes	2	7.176e-12	135.79	1742400000	34261000	41122000	836620000	830440000	34261000	38414000	400620000	410650000
EAAGTTAAAGTGGTTEQPPR	20	0	1842.87	Q9Z315	Q9Z315	12	31	Sart1	U4/U6.U5 tri-snRNP-associated protein 1	yes	yes	2;3	3.5424e-06	48.376	282780000	0	0	203500000	79280000	0	0	97446000	39204000
EAAQMDMVNDGVEDLR	16	0	1791.78	P19157;A0A494B908;A0A494BAW2	P19157	86	101	Gstp1	Glutathione S-transferase P 1	yes	no	2;3	0.00018381	110.08	365250000	168540000	196710000	0	0	168540000	183760000	0	0
EAAQMDMVNDGVEDLRGK	18	1	1976.89	P19157;A0A494B908;A0A494BAW2	P19157	86	103	Gstp1	Glutathione S-transferase P 1	yes	no	2;3	9.513e-05	45.608	312650000	146960000	165690000	0	0	146960000	154780000	0	0
EAATVEELNPK	11	0	1199.6	B7ZNL2;Q78ZA7	B7ZNL2	147	157	Nap1l4	Nucleosome assembly protein 1-like 4	yes	no	2	0.0038372	68.016	15550000	0	15550000	0	0	0	14526000	0	0
EAAVSHAGSMHR	12	0	1251.58	A2AS98;P28660	A2AS98	335	346	Nckap1	Nck-associated protein 1	yes	no	2;3;4	0.00093447	103.7	102920000	0	13910000	78008000	11005000	0	12994000	37355000	5442100
EADIDGDGQVNYEEFVQMMTAK	22	0	2489.07	P0DP28;P0DP27;P0DP26;A0A3Q4EHJ0;G3UX57	P0DP28	128	149	Calm3		yes	no	2;3	4.2515e-08	72.321	409520000	0	0	217680000	191840000	0	0	104240000	94864000
EAEAAIYHLQLFEELRR	17	1	2087.08	P52480	P52480	384	400	Pkm	Pyruvate kinase PKM	yes	yes	3	7.3685e-17	132.84	242470000	0	0	121770000	120700000	0	0	58310000	59684000
EAEGSFTEYEKEIEELKELLPEIR	24	2	2880.43	B1AU76;B1AU75;Q99MD9	B1AU76	288	311	Nasp	Nuclear autoantigenic sperm protein	yes	no	4	3.5556e-10	71.148	25109000	0	0	25109000	0	0	0	12024000	0
EAESCDCLQGFQLTHSLGGGTGSGMGTLLISK	32	0	3310.53	P68372;P99024;Q9D6F9	P68372	123	154	Tubb4b;Tubb5;Tubb4a	Tubulin beta-4B chain;Tubulin beta-5 chain;Tubulin beta-4A chain	no	no	3;4	2.7015e-18	61.499	1440400000	0	0	820550000	619890000	0	0	392930000	306530000
EAESLIAK	8	0	859.465	P80314;A0A1W2P7B7;A0A1W2P828	P80314	112	119	Cct2	T-complex protein 1 subunit beta	yes	no	2	0.039076	76.035	63452000	0	63452000	0	0	0	59274000	0	0
EAESSPFVER	10	0	1149.53	P08113;F7C312	P08113	548	557	Hsp90b1	Endoplasmin	yes	no	2	2.527e-08	154.49	170940000	0	0	77012000	93931000	0	0	36878000	46449000
EAETFPFNPFDLTK	14	0	1654.79	P24270	P24270	288	301	Cat	Catalase	yes	yes	2	0.010803	44.299	22267000	0	0	22267000	0	0	0	10663000	0
EAFQEALAAAGDK	13	0	1319.64	P10639	P10639	9	21	Txn	Thioredoxin	yes	yes	2;3	0.00033926	101.95	2385000000	1133000000	1213800000	0	38274000	1133000000	1133900000	0	18926000
EAFSLFDKDGDGTITTK	17	1	1843.88	P0DP28;P0DP27;P0DP26	P0DP28	15	31			yes	no	2;3	0.00029361	88.803	3942600000	0	82626000	1496900000	2363100000	0	77186000	716790000	1168500000
EAGDVCYADVYR	12	0	1416.6	H7BX95;Q6PDM2;F7AI47	H7BX95	143	154	Srsf1	Serine/arginine-rich splicing factor 1	yes	no	2	0.0026175	62.303	131820000	131820000	0	0	0	131820000	0	0	0
EAGELKPEEEITVGPVQK	18	1	1952.01	Q9JIF7	Q9JIF7	496	513	Copb1	Coatomer subunit beta	yes	yes	3	0.0011152	34.498	28777000	28777000	0	0	0	28777000	0	0	0
EAGGGGVGGPGAK	13	0	1012.49	Q9CY58;Q3UMP4;A0A0N4SV32;A0A0N4SWH2;A0A0N4SUQ1;A0A0N4SUN8	Q9CY58	40	52	Serbp1	Plasminogen activator inhibitor 1 RNA-binding protein	yes	no	2	0.0018648	72.643	17658000	0	17658000	0	0	0	16495000	0	0
EAGTKEEPVAADVINPMALR	20	1	2110.07	Q9Z315;A0A494B9E9	Q9Z315	143	162	Sart1	U4/U6.U5 tri-snRNP-associated protein 1	yes	no	3	8.3036e-06	94.387	278620000	0	0	144560000	134060000	0	0	69222000	66294000
EAGVFVPR	8	0	873.471	Q3V117;Q91V92	Q3V117	781	788	Acly	ATP-citrate synthase	yes	no	2	0.042164	72.138	21353000	21353000	0	0	0	21353000	0	0	0
EAHEPLAVADAK	12	0	1249.63	Q6DFW4;A0A0A0MQ76;A0A087WSU5	Q6DFW4	82	93	Nop58	Nucleolar protein 58	yes	no	2	0.0026866	57.888	0	0	0	0	0	0	0	0	0
EAHKSEIAHR	10	1	1176.6	P07724	P07724	25	34	Alb	Serum albumin	yes	yes	3	0.027763	52.579	24404000	24404000	0	0	0	24404000	0	0	0
EAHNEVEPLCILDFYIHESVQR	22	0	2697.29	Q8K341;F7BUT2;B8JJ72	Q8K341	111	132	Atat1	Alpha-tubulin N-acetyltransferase 1	yes	no	4	0.012572	27.739	16266000	0	0	0	16266000	0	0	0	8043300
EAIEGTYIDKK	11	1	1265.65	P62281;A0A1B0GRR3;A0A1B0GSE8	P62281	49	59	Rps11	40S ribosomal protein S11	yes	no	2	0.0063118	115.71	577800000	0	0	302150000	275660000	0	0	144690000	136310000
EAINVEQAFQTIAR	14	0	1588.82	P51150	P51150	158	171	Rab7a	Ras-related protein Rab-7a	yes	yes	2	0.0016765	72.531	49959000	0	0	23464000	26495000	0	0	11236000	13102000
EAIVNSCVFVHQTLHQANAR	20	0	2293.14	Q9JHU4	Q9JHU4	3139	3158	Dync1h1	Cytoplasmic dynein 1 heavy chain 1	yes	yes	3	0.031822	24.3	22224000	22224000	0	0	0	22224000	0	0	0
EAKPDELMDSK	11	1	1261.59	Q9WV55;A0A3B2W837	Q9WV55	115	125	Vapa	Vesicle-associated membrane protein-associated protein A	yes	no	2	0.027144	50.791	44592000	0	0	44592000	0	0	0	21353000	0
EALDLGITGPEGIEISHPEELEAEATHR	28	0	3012.47	Q9EQF6	Q9EQF6	204	231	Dpysl5	Dihydropyrimidinase-related protein 5	yes	yes	3;4	6.5298e-13	88.571	363970000	0	0	332200000	31767000	0	0	159080000	15709000
EALDNSTNLK	10	0	1103.55	Q80VP0	Q80VP0	433	442	Tecpr1	Tectonin beta-propeller repeat-containing protein 1	yes	yes	2	0.016506	57.59	0	0	0	0	0	0	0	0	0
EALELLK	7	0	814.48	P17182;Q6PHC1	P17182	222	228	Eno1	Alpha-enolase	yes	no	1	0.026791	114.78	108640000	108640000	0	0	0	108640000	0	0	0
EALELTDTGLLSGSEER	17	0	1818.88	Q9JHU4	Q9JHU4	1300	1316	Dync1h1	Cytoplasmic dynein 1 heavy chain 1	yes	yes	2	0.0071968	40.589	15575000	0	15575000	0	0	0	14550000	0	0
EALEVDWSGEK	11	0	1261.58	Q9R1T2	Q9R1T2	222	232	Sae1	SUMO-activating enzyme subunit 1;SUMO-activating enzyme subunit 1, N-terminally processed	yes	yes	2	0.038314	43.308	13521000	13521000	0	0	0	13521000	0	0	0
EALFNEFVAAAR	12	0	1336.68	Q8CGF7;A0A494B9W7	Q8CGF7	772	783	Tcerg1	Transcription elongation regulator 1	yes	no	2	0.0088914	54.416	22553000	22553000	0	0	0	22553000	0	0	0
EALGHWLGLLNADGWIGR	18	0	1977.02	Q80UM7	Q80UM7	466	483	Mogs	Mannosyl-oligosaccharide glucosidase	yes	yes	3	0.0089035	32.55	10765000	0	0	0	10765000	0	0	0	5323400
EALLGVQEDVDEYVK	15	0	1705.84	Q8BP92	Q8BP92	45	59	Rcn2	Reticulocalbin-2	yes	yes	2	0.0049747	49.5	30634000	0	0	0	30634000	0	0	0	15148000
EALLSSAVDHGSDEAR	16	0	1655.78	P80314;A0A1W2P7B7	P80314	139	154	Cct2	T-complex protein 1 subunit beta	yes	no	2	0.00084296	93.959	171010000	0	0	90537000	80469000	0	0	43354000	39792000
EAMECSDVIWQR	12	0	1522.65	F6RJV6;Q9JJK2	F6RJV6	337	348	Lancl2	LanC-like protein 2	yes	no	2	0.0025786	66.435	47594000	47594000	0	0	0	47594000	0	0	0
EAMEDGEIDGNKVTLDWAK	19	1	2119.97	P09405	P09405	625	643	Ncl	Nucleolin	yes	yes	3	0.0037845	40.085	20864000	0	0	0	20864000	0	0	0	10317000
EAMEDGEIDGNKVTLDWAKPK	21	2	2345.12	P09405	P09405	625	645	Ncl	Nucleolin	yes	yes	4	0.037314	21.901	79825000	0	0	0	79825000	0	0	0	39473000
EAMNDPLLER	10	0	1186.57	O35286;Q497W9;A0A0G2JG10;A0A0G2JGQ5	O35286	244	253	Dhx15	Pre-mRNA-splicing factor ATP-dependent RNA helicase DHX15	yes	no	2	0.0049746	84.615	123220000	61288000	61932000	0	0	61288000	57854000	0	0
EANEILQR	8	0	971.504	P24547;E0CXK0;A0A0A6YXS4;E0CYE2;F7DEU6;P50096	P24547	196	203	Impdh2;Impdh1	Inosine-5-monophosphate dehydrogenase 2;Inosine-5-monophosphate dehydrogenase;Inosine-5-monophosphate dehydrogenase 1	yes	no	2	0.035313	86.472	77857000	0	0	77857000	0	0	0	37282000	0
EANELQQWITEK	12	0	1487.73	A3KGU5;A3KGU7;E9Q447;A3KGU9;P16546	A3KGU5	1079	1090	Sptan1	Spectrin alpha chain, non-erythrocytic 1	yes	no	2	0.010998	65.627	40678000	40678000	0	0	0	40678000	0	0	0
EANHNVSAPYGR	12	0	1313.61	Q5SQX6;F6QD74;Q7TMB8;A0A0R4J119;A0A0U1RQ05	Q5SQX6	826	837	Cyfip2;Cyfip1	Cytoplasmic FMR1-interacting protein 2;Cytoplasmic FMR1-interacting protein 1	yes	no	2	0.0047973	60.518	17006000	0	17006000	0	0	0	15886000	0	0
EANMEGIVTIMGLKPETR	18	1	1988.01	P13595;A0A0A6YY91;E9Q589;A0A0A6YWU2;A0A0A6YY47;E9QB01	P13595	555	572	Ncam1	Neural cell adhesion molecule 1	no	no	2;3	1.7051e-08	100.77	1221900000	123280000	82116000	646110000	370400000	123280000	76710000	309390000	183160000
EANQAINPK	9	0	983.504	Q8BTS0;Q61656	Q8BTS0	462	470	Ddx5	Probable ATP-dependent RNA helicase DDX5	yes	no	2	0.0050855	81.784	0	0	0	0	0	0	0	0	0
EAPAPPKAEAK	11	1	1107.59	P62751	P62751	8	18	Rpl23a	60S ribosomal protein L23a	yes	yes	2;3	7.2627e-05	117.52	198750000	0	0	97766000	100980000	0	0	46816000	49937000
EAPPMEKPEVVK	12	1	1352.7	D3YTQ9;P62843	D3YTQ9	39	50	Rps15	40S ribosomal protein S15	yes	no	3	0.0050854	50.467	211440000	35246000	47668000	67113000	61412000	35246000	44530000	32138000	30368000
EAQLPVIENK	10	0	1139.62	P20918	P20918	720	729	Plg	Plasminogen;Plasmin heavy chain A;Activation peptide;Angiostatin;Plasmin heavy chain A, short form;Plasmin light chain B	yes	yes	2	0.0076725	78.113	64274000	32645000	31630000	0	0	32645000	29547000	0	0
EAQLYAAQAHLK	12	0	1341.7	B1AU76;B1AU75;Q99MD9	B1AU76	197	208	Nasp	Nuclear autoantigenic sperm protein	yes	no	2	0.0021798	71.349	144020000	0	0	65064000	78953000	0	0	31157000	39042000
EAQQYSEALASTR	13	0	1452.68	Q9CYL5	Q9CYL5	38	50	Glipr2	Golgi-associated plant pathogenesis-related protein 1	yes	yes	2	0.0015281	67.153	24062000	0	0	24062000	0	0	0	11522000	0
EAQSICER	8	0	991.439	H3BIY9;Q9DBG3;H3BKM0;Q5SVG5;Q5SVG4;O35643	H3BIY9	236	243	Ap2b1;Ap1b1	AP complex subunit beta;AP-2 complex subunit beta;AP-1 complex subunit beta-1	yes	no	2	0.011864	86.953	0	0	0	0	0	0	0	0	0
EASYSLIR	8	0	937.487	Z4YKB8;Q3TEA8;Z4YKA3;A2AM65	Z4YKB8	275	282	Hp1bp3	Heterochromatin protein 1-binding protein 3	yes	no	2	0.034174	89.369	15173000	15173000	0	0	0	15173000	0	0	0
EATDAIGHLDR	11	0	1196.58	Q45VK5;A0A1L1STE4;Q9Z1X4	Q45VK5	298	308	Ilf3	Interleukin enhancer-binding factor 3	yes	no	3	0.0028889	51.013	133810000	17008000	0	61907000	54890000	17008000	0	29645000	27143000
EATDPRPYEAENAIESWR	18	1	2132.98	P47754;A0A0N4SVM0;D6RCW7	P47754	104	121	Capza2	F-actin-capping protein subunit alpha-2	yes	no	3	0.035544	23.562	22957000	0	22957000	0	0	0	21445000	0	0
EATEKEFEPLLNWMK	15	1	1863.91	P08113;F7C312	P08113	609	623	Hsp90b1	Endoplasmin	yes	no	3	0.0050049	46.964	220720000	0	0	220720000	0	0	0	105690000	0
EATESFASDPILYRPVAVALDTK	23	1	2492.28	P52480;A0A1L1SU37;A0A1L1SQV8;A0A1L1SSN6;A0A1L1STV8;A0A1L1SUV0	P52480	93	115	Pkm	Pyruvate kinase PKM	yes	no	3	7.9082e-08	85.518	217980000	0	0	106760000	111220000	0	0	51124000	54999000
EATNPPIIQEEKPK	14	1	1592.84	P27773	P27773	483	496	Pdia3	Protein disulfide-isomerase A3	yes	yes	3	0.0073118	38.028	11112000	5745100	5367100	0	0	5745100	5013800	0	0
EAVAMESFAK	10	0	1081.51	P80314	P80314	432	441	Cct2	T-complex protein 1 subunit beta	yes	yes	2	0.0030329	96.948	38207000	20158000	18049000	0	0	20158000	16861000	0	0
EAVTEILGIEPDREK	15	1	1697.88	Q62348	Q62348	117	131	Tsn	Translin	yes	yes	2;3	0.00057208	78.932	121980000	0	0	68171000	53806000	0	0	32644000	26607000
EAVVQAEEAAAEITR	15	0	1585.79	Q9D6Z1;F6U250;F6V095;F7CHQ7;A2APD7	Q9D6Z1	423	437	Nop56	Nucleolar protein 56	yes	no	2	0.018772	47.062	26023000	0	26023000	0	0	0	24310000	0	0
EAYPEEAYIADLDAK	15	0	1696.78	Q3V117;Q91V92;Q3TS02	Q3V117	245	259	Acly	ATP-citrate synthase	yes	no	2	0.0029113	69.261	120330000	40997000	42790000	0	36545000	40997000	39973000	0	18071000
EAYPGDVFYLHSR	13	0	1552.73	Q03265;D3Z6F5	Q03265	335	347	Atp5a1	ATP synthase subunit alpha, mitochondrial;ATP synthase subunit alpha	yes	no	2;3	0.00025439	71.03	198510000	36314000	34289000	63828000	64081000	36314000	32031000	30564000	31688000
ECADLWPR	8	0	1045.47	P62830	P62830	124	131	Rpl23	60S ribosomal protein L23	yes	yes	2	0.039138	75.854	10081000	10081000	0	0	0	10081000	0	0	0
ECCHGDLLECADDR	14	0	1748.66	P07724	P07724	268	281	Alb	Serum albumin	yes	yes	2;3	0.00078999	48.704	398440000	194740000	203700000	0	0	194740000	190290000	0	0
ECHKCPAPNLEGGPSVFIFPPNIK	24	1	2707.33	A0A075B5P3;A0A0A6YVP0;P01867	P01867	113	136	Ighg2b;Igh-3	Ig gamma-2B chain C region	no	no	3	0.033022	34.405	176210000	0	0	176210000	0	0	0	84379000	0
ECHLNADTVSSK	12	0	1359.61	H3BIY9;Q9DBG3;H3BKM0	H3BIY9	870	881	Ap2b1	AP complex subunit beta;AP-2 complex subunit beta	yes	no	2	0.00066128	89.032	153130000	28067000	30827000	47750000	46486000	28067000	28797000	22865000	22987000
ECISIHVGQAGVQIGNACWELYCLEHGIQPDGQMPSDK	38	0	4295.95	P05213;A0A2R8VHF3;P68369;P05214	P68369	3	40	Tuba1b;Tuba1a;Tuba3a	Tubulin alpha-1B chain;Tubulin alpha-1A chain;Tubulin alpha-3 chain	no	no	4	9.4342e-13	49.814	273180000	0	0	155420000	117750000	0	0	74425000	58229000
ECPSDECGAGVFMGSHFDR	19	0	2156.84	P62983	P62983	120	138	Rps27a	Ubiquitin-40S ribosomal protein S27a;Ubiquitin;40S ribosomal protein S27a	yes	yes	3	2.3862e-05	59.512	681900000	203740000	0	222540000	255620000	203740000	0	106570000	126400000
EDAANNYAR	9	0	1022.44	P05213;A0A0A0MQA5;P68368;A0A2R8VHF3;A0A087WRB4;A0A087WQS4;P68369;P05214	P68369	97	105	Tuba1b;Tuba4a;Tuba1a;Tuba3a	Tubulin alpha-1B chain;Tubulin alpha-4A chain;Tubulin alpha-1A chain;Tubulin alpha-3 chain	no	no	2	5.9993e-15	170.06	376820000	108880000	113190000	75963000	78791000	108880000	105730000	36375000	38962000
EDAMAMVDHCLK	12	0	1418.6	Q8K310;A0A494BAZ7;A0A494BAD4;A0A494B9X1	Q8K310	543	554	Matr3	Matrin-3	yes	no	2	0.0019346	73.985	85438000	50154000	35284000	0	0	50154000	32961000	0	0
EDAMAMVDHCLKK	13	1	1546.69	Q8K310;A0A494BAZ7;A0A494BAD4;A0A494B9X1	Q8K310	543	555	Matr3	Matrin-3	yes	no	4	0.033453	27.409	10667000	0	10667000	0	0	0	9964700	0	0
EDAPVGPHLQSMPSEQIR	18	0	1989.96	P23116	P23116	503	520	Eif3a	Eukaryotic translation initiation factor 3 subunit A	yes	yes	3	0.00024638	49.224	22172000	0	22172000	0	0	0	20713000	0	0
EDGAISTIVLR	11	0	1172.64	P42932;H3BL49;H3BJB6	P42932	368	378	Cct8	T-complex protein 1 subunit theta	yes	no	2	0.0039948	74.173	19617000	0	19617000	0	0	0	18325000	0	0
EDIHAGGGGAR	11	0	1038.48	Q9CX86	Q9CX86	177	187	Hnrnpa0	Heterogeneous nuclear ribonucleoprotein A0	yes	yes	2;3	0.0022199	72.968	34431000	25979000	8452100	0	0	25979000	7895600	0	0
EDLQLDKPASGVK	13	1	1398.74	G3UYD0;Q3UHU8;Q9ESZ8;G3UYJ6	G3UYD0	359	371	Gtf2i	General transcription factor II-I	yes	no	2	0.0023318	73.781	126380000	59326000	67057000	0	0	59326000	62642000	0	0
EDLQLDKPASGVKEEWYAR	19	2	2233.1	G3UYD0;Q3UHU8;Q9ESZ8;G3UYJ6	G3UYD0	359	377	Gtf2i	General transcription factor II-I	yes	no	3	2.9795e-05	102.36	96206000	0	0	48007000	48199000	0	0	22988000	23834000
EDLRLPEGDLGK	12	1	1340.69	A0A0A0MQM0;P63242;J3QPS8	A0A0A0MQM0	110	121	Eif5a	Eukaryotic translation initiation factor 5A;Eukaryotic translation initiation factor 5A-1	yes	no	2;3	0.0018773	70.622	298790000	0	0	221840000	76949000	0	0	106230000	38051000
EDLRLPEGDLGKEIEQK	17	2	1968.02	A0A0A0MQM0;P63242;J3QPS8	A0A0A0MQM0	110	126	Eif5a	Eukaryotic translation initiation factor 5A;Eukaryotic translation initiation factor 5A-1	yes	no	2;3;4	2.5363e-10	124.29	1506700000	313130000	211560000	458860000	523120000	313130000	197630000	219730000	258680000
EDLYLKPIQR	10	1	1273.7	P58252	P58252	440	449	Eef2	Elongation factor 2	yes	yes	2;3	3.6338e-10	147.04	497790000	34428000	32710000	261530000	169120000	34428000	30557000	125240000	83630000
EDPLLTPVPASENPFR	16	0	1780.9	P63213	P63213	47	62	Gng2	Guanine nucleotide-binding protein G(I)/G(S)/G(O) subunit gamma-2	yes	yes	2	0.00033064	105.2	252060000	0	0	118430000	133630000	0	0	56713000	66078000
EDQTEYLEER	10	0	1310.56	P11499;P07901;B7ZC50	P07901	192	201	Hsp90ab1;Hsp90aa1	Heat shock protein HSP 90-beta;Heat shock protein HSP 90-alpha	no	no	2	0.037027	54.608	11692000	11692000	0	0	0	11692000	0	0	0
EDSQRPGAHLTVK	13	1	1436.74	Q5EBP8;P49312	Q5EBP8	93	105	Hnrnpa1	Heterogeneous nuclear ribonucleoprotein A1;Heterogeneous nuclear ribonucleoprotein A1, N-terminally processed	yes	no	2;3;4	0.00096438	96.015	5031500000	171010000	163910000	3005800000	1690800000	171010000	153120000	1439300000	836090000
EDSVKPGAHLTVK	13	1	1379.74	A2AL12;Q8BG05;V9GX38	A2AL12	114	126	Hnrnpa3;Gm17190	Heterogeneous nuclear ribonucleoprotein A3	yes	no	2;3;4	0.00044328	106.62	1160500000	217610000	0	215790000	727060000	217610000	0	103330000	359530000
EDTEEHHLR	9	0	1164.52	O88569;A0A0N4SUM2;Q5EBP8;P49312	O88569	121	129	Hnrnpa2b1;Hnrnpa1	Heterogeneous nuclear ribonucleoproteins A2/B1;Heterogeneous nuclear ribonucleoprotein A1;Heterogeneous nuclear ribonucleoprotein A1, N-terminally processed	no	no	2;3	0.0004137	124.08	41635000	0	41635000	0	0	0	38894000	0	0
EDTEEHHLRDYFEEYGK	17	1	2195.94	O88569;A0A0N4SUM2	O88569	121	137	Hnrnpa2b1	Heterogeneous nuclear ribonucleoproteins A2/B1	yes	no	3	0.0037634	42.813	49248000	0	0	49248000	0	0	0	23583000	0
EDVGQPQPGR	10	0	1081.52	Q9WVA4;A0A0A6YXG6	Q9WVA4	40	49	Tagln2	Transgelin-2	yes	no	2	0.029841	54.157	5837500	3537500	2300000	0	0	3537500	2148600	0	0
EEAESTLQSFR	11	0	1295.6	P20152;A0A0A6YWC8	P20152	197	207	Vim	Vimentin	yes	no	2	0.0012814	88.496	419020000	190540000	169830000	58647000	0	190540000	158650000	28084000	0
EEAQAEIEQYR	11	0	1364.62	Q9CR51	Q9CR51	38	48	Atp6v1g1	V-type proton ATPase subunit G 1	yes	yes	2	0.021782	50.473	36164000	0	36164000	0	0	0	33783000	0	0
EEASDYLELDTIK	13	0	1524.72	P08113	P08113	253	265	Hsp90b1	Endoplasmin	yes	yes	2	9.6283e-07	84.658	552450000	25995000	0	285190000	241260000	25995000	0	136570000	119300000
EEDLSSFSIADLK	13	0	1452.7	P24527	P24527	481	493	Lta4h	Leukotriene A-4 hydrolase	yes	yes	2	0.012894	46.406	9315900	0	9315900	0	0	0	8702600	0	0
EEEIAALVIDNGSGMCK	17	0	1834.84	P63260;G3UYG0;B1ATY1	P63260	2	18	Actg1	Actin, cytoplasmic 2;Actin, cytoplasmic 2, N-terminally processed	yes	no	2	1.1532e-17	134.56	279460000	0	0	144110000	135350000	0	0	69006000	66931000
EEELSLQDITMR	12	0	1462.7	Q8R5H6	Q8R5H6	87	98	Wasf1	Wiskott-Aldrich syndrome protein family member 1	yes	yes	2	0.00071715	86.624	19365000	0	19365000	0	0	0	18090000	0	0
EEEWDPEYTPK	11	0	1421.6	Q569Z6;F6YH92;Q8K019	Q569Z6	862	872	Thrap3;Bclaf1	Thyroid hormone receptor-associated protein 3;Bcl-2-associated transcription factor 1	no	no	2	0.028695	46.891	44183000	23999000	20184000	0	0	23999000	18855000	0	0
EEFVETCPGELK	12	0	1436.65	A0A668KLC6;P20357	A0A668KLC6	1434	1445	Map2	Microtubule-associated protein 2	yes	no	2	0.0072146	56.916	64011000	31724000	32287000	0	0	31724000	30161000	0	0
EEGVPTLWR	9	0	1085.55	Q5SX46;Q9CR62	Q5SX46	142	150	Slc25a11	Mitochondrial 2-oxoglutarate/malate carrier protein	yes	no	2	0.012771	85.064	7777800	2646900	5130900	0	0	2646900	4793100	0	0
EEGYDSVFSVVR	12	0	1385.65	A0A0R4J0B4;Q99KK2	A0A0R4J0B4	161	172	Cmas	N-acylneuraminate cytidylyltransferase	yes	no	2	0.0022812	70.1	66785000	37714000	29072000	0	0	37714000	27158000	0	0
EEHGGLIR	8	0	909.467	Q80XR5;P26369;A0A140LJK3	Q80XR5	71	78	U2af2	Splicing factor U2AF 65 kDa subunit	yes	no	2	0.011938	97.068	0	0	0	0	0	0	0	0	0
EEIVLLTHGDSVDK	14	0	1553.79	Q3THK7	Q3THK7	146	159	Gmps	GMP synthase [glutamine-hydrolyzing]	yes	yes	2	0.01088	44.188	9300000	0	9300000	0	0	0	8687700	0	0
EELEEVIKDI	10	1	1215.62	Q9Z2U1	Q9Z2U1	232	241	Psma5	Proteasome subunit alpha type-5	yes	yes	2	0.0037187	97.431	44997000	0	0	26434000	18563000	0	0	12658000	9179600
EELSNVLAAMR	11	0	1231.62	Q6ZWZ4	Q6ZWZ4	88	98	Rpl36	60S ribosomal protein L36	yes	yes	2	0.00053247	101.64	304330000	45967000	56437000	112840000	89083000	45967000	52721000	54036000	44051000
EEPGSDSGTTAVVALIR	17	0	1700.86	A0A0J9YVG0;Q61074	A0A0J9YVG0	211	227	Ppm1g	Protein phosphatase 1G	yes	no	2	0.016269	57.019	38056000	0	0	38056000	0	0	0	18224000	0
EEQSPVKAEVAEK	13	1	1442.73	P14873	P14873	611	623	Map1b	Microtubule-associated protein 1B;MAP1B heavy chain;MAP1 light chain LC1	yes	yes	2	0.0040996	58.699	29941000	0	0	0	29941000	0	0	0	14806000
EESGKPGAHVTVK	13	1	1337.69	O88569	O88569	100	112	Hnrnpa2b1	Heterogeneous nuclear ribonucleoproteins A2/B1	yes	yes	2;3;4	1.5383e-08	143.24	10507000000	711130000	780040000	5369400000	3646000000	711130000	728690000	2571200000	1802900000
EESGKPGAHVTVKK	14	2	1465.79	O88569	O88569	100	113	Hnrnpa2b1	Heterogeneous nuclear ribonucleoproteins A2/B1	yes	yes	3	0.012981	40.025	6529800	0	6529800	0	0	0	6099900	0	0
EETQPPVALKK	11	1	1238.69	Q9CY58;Q3UMP4;A0A0N4SV32;A0A0N4SWH2;A0A0N4SUQ1;A0A0N4SUN8;A0A0N4SV40;A0A0N4SVK5	Q9CY58	93	103	Serbp1	Plasminogen activator inhibitor 1 RNA-binding protein	yes	no	2;3	0.0066284	69.598	1192500000	0	0	633720000	558780000	0	0	303460000	276310000
EEYEGPNKKPR	11	2	1345.66	Q8VIJ6	Q8VIJ6	688	698	Sfpq	Splicing factor, proline- and glutamine-rich	yes	yes	3;4	0.00041414	87.298	197470000	16753000	34845000	70626000	75247000	16753000	32551000	33820000	37209000
EFADFEYR	8	0	1075.46	Q8K2F8;A0A0U1RP30	Q8K2F8	448	455	Lsm14a	Protein LSM14 homolog A	yes	no	2	2.7839e-13	162.5	107330000	0	0	69534000	37792000	0	0	33297000	18688000
EFCQQEVEPMCK	12	0	1583.64	D3YWF6;Q7TQI3	D3YWF6	172	183	Otub1	Ubiquitin thioesterase OTUB1	yes	no	2	0.0067893	57.55	37265000	37265000	0	0	0	37265000	0	0	0
EFDELSPSAQR	11	0	1277.59	O55143	O55143	656	666	Atp2a2	Sarcoplasmic/endoplasmic reticulum calcium ATPase 2	yes	yes	2	0.0018404	78.264	26384000	26384000	0	0	0	26384000	0	0	0
EFEPLLNWMK	10	0	1305.64	P08113;F7C312	P08113	614	623	Hsp90b1	Endoplasmin	yes	no	2	0.0045094	89.298	62223000	0	4714800	25042000	32466000	0	4404400	11992000	16054000
EFEVYGPIKR	10	1	1236.65	Q62376;A0A1B0GRR8;A0A1B0GR44	Q62376	122	131	Snrnp70	U1 small nuclear ribonucleoprotein 70 kDa	yes	no	2	0.0081013	70.525	90726000	0	0	46305000	44421000	0	0	22174000	21966000
EFHGNIIK	8	0	956.508	F6QCI0;Q8BQ46	F6QCI0	112	119	Taf15		yes	no	2	0.035172	94.407	272770000	0	0	135410000	137350000	0	0	64844000	67921000
EFHLNESGDPSSK	13	0	1445.64	A2BE93;Q9EQU5	A2BE93	154	166	Set	Protein SET	yes	no	2;3	5.2433e-22	150.46	777270000	24670000	24995000	377210000	350390000	24670000	23350000	180630000	173270000
EFLHAQEEVKR	11	1	1384.71	P54775	P54775	71	81	Psmc4	26S protease regulatory subunit 6B	yes	yes	4	0.015905	38.783	13805000	8033600	5771000	0	0	8033600	5391000	0	0
EFLPQGPVAMR	11	0	1243.64	A0A0R4J023;Q9JLZ3;F6RT60	A0A0R4J023	252	262	Auh	Methylglutaconyl-CoA hydratase, mitochondrial	yes	no	2	0.0021245	86.011	27403000	0	27403000	0	0	0	25599000	0	0
EFNAEVHR	8	0	1000.47	P47962;D3YYV8	P47962	189	196	Rpl5	60S ribosomal protein L5	yes	no	2;3	0.032967	101.64	54180000	32655000	21525000	0	0	32655000	20108000	0	0
EFNEEGALSVLQQFK	15	0	1737.86	Q8VHM5;A2AW41;V9GWW3	Q8VHM5	70	84	Hnrnpr		yes	no	2	0.025285	50.108	73034000	0	0	0	73034000	0	0	0	36115000
EFNGLGDCLTK	11	0	1252.58	P48962	P48962	153	163	Slc25a4	ADP/ATP translocase 1	yes	yes	2	0.011559	57.532	71564000	0	71564000	0	0	0	66853000	0	0
EFSPFGTITSAK	12	0	1283.64	P29341;Q9D4E6	P29341	313	324	Pabpc1;Pabpc6	Polyadenylate-binding protein 1;Polyadenylate-binding protein	yes	no	2	0.001665	76.143	169530000	0	20708000	70060000	78764000	0	19345000	33549000	38949000
EGALCEENMR	10	0	1207.5	P58252	P58252	689	698	Eef2	Elongation factor 2	yes	yes	2	0.0017189	101.72	146090000	45677000	43430000	28030000	28958000	45677000	40571000	13422000	14320000
EGATVYATGTHALVEDGK	18	0	1817.88	Q922Q4	Q922Q4	130	147	Pycr2	Pyrroline-5-carboxylate reductase 2	yes	yes	3	0.0025402	25.586	18943000	0	18943000	0	0	0	17696000	0	0
EGCTEVSLLR	10	0	1162.57	Q00PI9	Q00PI9	304	313	Hnrnpul2	Heterogeneous nuclear ribonucleoprotein U-like protein 2	yes	yes	2	0.027555	56.258	49652000	24299000	25352000	0	0	24299000	23683000	0	0
EGDVLTLLESER	12	0	1359.69	G3UYV7;P62858	G3UYV7	39	50	Rps28	40S ribosomal protein S28	yes	no	2;3	0.0011717	79.974	2048000000	791570000	842030000	209210000	205180000	791570000	786600000	100180000	101460000
EGEFVAQFK	9	0	1053.51	P50580	P50580	312	320	Pa2g4	Proliferation-associated protein 2G4	yes	yes	2	0.011531	91.9	62125000	31928000	30196000	0	0	31928000	28208000	0	0
EGEHVIDQGDDGDNFYVIDR	20	0	2291.99	P31324;H3BK84	P31324	175	194	Prkar2b	cAMP-dependent protein kinase type II-beta regulatory subunit	yes	no	3	1.1647e-06	59.281	109200000	0	0	62984000	46220000	0	0	30161000	22856000
EGGAGAVDEDDFIK	14	0	1421.63	E9Q8N5;Q08EB6;Q08EB5;F7DCH5;Q8BRT1;A0A1L1SRY3;Q8BSE7;A0A1L1ST22	E9Q8N5	65	78	Clasp2	CLIP-associating protein 2	yes	no	2	0.024782	39.266	25718000	0	25718000	0	0	0	24024000	0	0
EGGDFVCCALSPR	13	0	1466.63	Q3UKJ7	Q3UKJ7	441	453	Smu1	WD40 repeat-containing protein SMU1;WD40 repeat-containing protein SMU1, N-terminally processed	yes	yes	2	0.012431	49.5	32658000	18103000	14556000	0	0	18103000	13597000	0	0
EGGFLLVHTVLK	12	0	1311.76	P19096;A0A0U1RNJ1	P19096	1333	1344	Fasn	Fatty acid synthase;[Acyl-carrier-protein] S-acetyltransferase;[Acyl-carrier-protein] S-malonyltransferase;3-oxoacyl-[acyl-carrier-protein] synthase;3-oxoacyl-[acyl-carrier-protein] reductase;3-hydroxyacyl-[acyl-carrier-protein] dehydratase;Enoyl-[acyl-carrier-protein] reductase;Oleoyl-[acyl-carrier-protein] hydrolase	yes	no	3	0.0091878	35.204	43827000	0	0	25771000	18056000	0	0	12340000	8928700
EGIECEVINLR	11	0	1330.66	Q9D051	Q9D051	259	269	Pdhb	Pyruvate dehydrogenase E1 component subunit beta, mitochondrial	yes	yes	2	0.0047491	65.224	76077000	0	0	30259000	45818000	0	0	14490000	22657000
EGLAQQVQQSLEK	13	0	1456.75	Q3TDD9	Q3TDD9	559	571	Ppp1r21	Protein phosphatase 1 regulatory subunit 21	yes	yes	2	0.0061257	52.79	32731000	14291000	18440000	0	0	14291000	17226000	0	0
EGLDDQGLTK	10	0	1074.52	Q91Z31	Q91Z31	420	429	Ptbp2	Polypyrimidine tract-binding protein 2	yes	yes	2	0.005073	83.623	91394000	50989000	0	0	40405000	50989000	0	0	19980000
EGMNIVEAMER	11	0	1277.57	P17742;A0A1L1SST0	P17742	134	144	Ppia	Peptidyl-prolyl cis-trans isomerase A;Peptidyl-prolyl cis-trans isomerase A, N-terminally processed	yes	no	2	0.0010701	65.347	1769100000	769490000	999620000	0	0	769490000	933810000	0	0
EGNDLYHEMIESGVINLK	18	0	2059.99	P56480	P56480	242	259	Atp5b	ATP synthase subunit beta, mitochondrial	yes	yes	3	0.0076506	21.309	112860000	0	0	112860000	0	0	0	54043000	0
EGRPSGEAFVELESEDEVK	19	1	2105.98	Q8C2Q7;O35737;P70333	Q8C2Q7	50	68	Hnrnph1;Hnrnph2	Heterogeneous nuclear ribonucleoprotein H;Heterogeneous nuclear ribonucleoprotein H, N-terminally processed;Heterogeneous nuclear ribonucleoprotein H2	yes	no	3	0.00027923	51.566	102160000	0	102160000	0	0	0	95437000	0	0
EGTGSTATSSGSAGGAVGK	19	0	1580.73	Q91WK2	Q91WK2	6	24	Eif3h	Eukaryotic translation initiation factor 3 subunit H	yes	yes	2	0.0055608	46.159	22754000	0	0	22754000	0	0	0	10896000	0
EGVHGGGLNK	10	0	966.488	Q9JJV2	Q9JJV2	117	126	Pfn2	Profilin-2	yes	yes	2;3	8.2106e-20	169.06	44571000	685120	43886000	0	0	685120	40997000	0	0
EGVHGGLINK	10	0	1022.55	P62962	P62962	117	126	Pfn1	Profilin-1	yes	yes	2	0.0073116	101.41	12156000	6480800	5675100	0	0	6480800	5301400	0	0
EGVVECSFVQSK	12	0	1367.64	P08249	P08249	270	281	Mdh2	Malate dehydrogenase, mitochondrial	yes	yes	2	0.00078126	83.862	359150000	126090000	0	0	233060000	126090000	0	0	115250000
EGYAWAEDKEHCEEYGR	17	1	2127.86	Q99LF4	Q99LF4	182	198	Rtcb	tRNA-splicing ligase RtcB homolog	yes	yes	3	0.0080532	38.613	39748000	39748000	0	0	0	39748000	0	0	0
EGYSGVGLLSR	11	0	1136.58	P28352;F6QA74;D3Z124;D3Z6R9	P28352	125	135	Apex1	DNA-(apurinic or apyrimidinic site) lyase;DNA-(apurinic or apyrimidinic site) lyase, mitochondrial	yes	no	2	0.018298	52.278	43067000	21756000	21311000	0	0	21756000	19908000	0	0
EHAALEPR	8	0	921.467	Q99KI0	Q99KI0	672	679	Aco2	Aconitate hydratase, mitochondrial	yes	yes	3	0.01893	65.246	9639600	0	9639600	0	0	0	9004900	0	0
EHALLAYTLGVK	12	0	1313.73	P10126;D3YZ68;D3Z3I8;P62631	P10126	135	146	Eef1a1;Eef1a2	Elongation factor 1-alpha 1;Elongation factor 1-alpha 2	no	no	2;3	1.5604e-07	143.96	1846800000	419370000	470740000	497890000	458830000	419370000	439750000	238420000	226890000
EHALTSGTIK	10	0	1055.56	A0A087WPE4;A0A087WQE6;A0A087WNT1;P83940	A0A087WPE4	34	43	Tceb1	Transcription elongation factor B polypeptide 1	yes	no	2;3	0.0069472	60.436	36311000	2555900	0	0	33755000	2555900	0	0	16692000
EHASSLASSGLK	12	0	1185.6	V9GWT6;V9GXH3;F8VPM7;Q99MI1;V9GXF0;V9GXP8;V9GX53	V9GWT6	652	663	Erc1	ELKS/Rab6-interacting/CAST family member 1	yes	no	2	0.013081	51.162	16722000	7952900	8769300	0	0	7952900	8192000	0	0
EHCPAGQPVK	10	0	1121.53	Q99PV0;B7ZC27	Q99PV0	433	442	Prpf8	Pre-mRNA-processing-splicing factor 8	yes	no	2	0.019696	63.48	3956400	0	3956400	0	0	0	3695900	0	0
EHDLVLPMR	9	0	1108.57	P19096;A0A0U1RNJ1	P19096	2163	2171	Fasn	Fatty acid synthase;[Acyl-carrier-protein] S-acetyltransferase;[Acyl-carrier-protein] S-malonyltransferase;3-oxoacyl-[acyl-carrier-protein] synthase;3-oxoacyl-[acyl-carrier-protein] reductase;3-hydroxyacyl-[acyl-carrier-protein] dehydratase;Enoyl-[acyl-carrier-protein] reductase;Oleoyl-[acyl-carrier-protein] hydrolase	yes	no	2	0.0023389	102.72	12020000	6129400	5890400	0	0	6129400	5502600	0	0
EHEKEVLQK	9	1	1138.6	P54227;D3Z1Z8;D3Z5N2	P54227	77	85	Stmn1	Stathmin	yes	no	2;3	9.3712e-41	193.41	286050000	47595000	238460000	0	0	47595000	222760000	0	0
EHFAQFGHVR	10	0	1226.59	F7DE82;Q9D8T7	F7DE82	32	41	Slirp	SRA stem-loop-interacting RNA-binding protein, mitochondrial	yes	no	3	0.0005968	101.65	97440000	0	0	46189000	51251000	0	0	22118000	25344000
EHGLIFMETSAK	12	0	1361.66	P53994;Q3TEG7;P59279	P53994	140	151	Rab2a;Rab2b	Ras-related protein Rab-2A;Ras-related protein Rab-2B	yes	no	2	0.0047973	60.518	25886000	25886000	0	0	0	25886000	0	0	0
EHHFGSSGMTLHER	14	0	1623.72	Q569Z6;Q8BZN7;F6YSQ2	Q569Z6	637	650	Thrap3	Thyroid hormone receptor-associated protein 3	yes	no	2;3;4	0.00073769	81.865	331520000	30958000	34714000	142890000	122960000	30958000	32429000	68424000	60803000
EHINLGCDVDFDIAGPSIR	19	0	2127.01	Q60932;F2Z471	Q60932	134	152	Vdac1	Voltage-dependent anion-selective channel protein 1	yes	no	3	1.9474e-05	45.916	122110000	0	0	48333000	73780000	0	0	23144000	36484000
EHINSVSAMK	10	0	1114.54	Q9JHU4	Q9JHU4	1497	1506	Dync1h1	Cytoplasmic dynein 1 heavy chain 1	yes	yes	2	0.030869	53.493	6606900	6606900	0	0	0	6606900	0	0	0
EHMGEILYK	9	0	1118.54	P50516	P50516	572	580	Atp6v1a	V-type proton ATPase catalytic subunit A	yes	yes	3	0.013304	51.193	22048000	0	0	12504000	9543800	0	0	5987800	4719400
EHMQPTHPIR	10	0	1244.61	P61982;P68510	P68510	163	172	Ywhag;Ywhah	14-3-3 protein gamma;14-3-3 protein gamma, N-terminally processed;14-3-3 protein eta	no	no	2;3;4	3.567e-27	176.79	3384100000	0	43982000	1434100000	1906100000	0	41086000	686710000	942570000
EHPWEVMPDLYFYRDPEEIEKEEQAAAEK	29	2	3577.63	P14206	P14206	192	220	Rpsa	40S ribosomal protein SA	yes	yes	4;5	5.3401e-17	85	779440000	0	0	512880000	266560000	0	0	245600000	131810000
EHTALLK	7	0	810.46	O55142	O55142	23	29	Rpl35a	60S ribosomal protein L35a	yes	yes	2	0.030823	111.73	47995000	0	47995000	0	0	0	44836000	0	0
EHVIEALR	8	0	965.529	I7HLV2;Q6ZWV3;P86048	I7HLV2	146	153	Rpl10;Rpl10l	60S ribosomal protein L10;60S ribosomal protein L10-like	yes	no	2;3	0.011492	101.28	85953000	20851000	32253000	17204000	15645000	20851000	30129000	8238100	7736500
EHVIEALRR	9	1	1121.63	I7HLV2;Q6ZWV3;P86048	I7HLV2	146	154	Rpl10;Rpl10l	60S ribosomal protein L10;60S ribosomal protein L10-like	yes	no	3	0.015677	64.654	66277000	35164000	31114000	0	0	35164000	29065000	0	0
EIAEAYLGK	9	0	992.518	P63017;Q504P4	P63017	129	137	Hspa8	Heat shock cognate 71 kDa protein	yes	no	2	0.023528	72.485	24945000	24945000	0	0	0	24945000	0	0	0
EICCYSISCK	10	0	1318.54	F6QKK2;Q8VEH3;A0A0N4SVB8;Q9CQW2	F6QKK2	135	144	Arl8a;Arl8b	ADP-ribosylation factor-like protein 8A;ADP-ribosylation factor-like protein 8B	yes	no	2	0.027223	56.563	34308000	34308000	0	0	0	34308000	0	0	0
EIDPQNDLTFLR	12	0	1459.73	P62627;A2AVR9	P62627	59	70	Dynlrb1	Dynein light chain roadblock-type 1	yes	no	2	0.002752	64.297	35093000	0	35093000	0	0	0	32783000	0	0
EIDQEAAVEVSQLRDPQHDLDR	22	1	2562.23	Q9CR68	Q9CR68	183	204	Uqcrfs1	Cytochrome b-c1 complex subunit Rieske, mitochondrial;Cytochrome b-c1 complex subunit 11	yes	yes	4	0.0056412	32.081	67829000	0	0	0	67829000	0	0	0	33542000
EIEIDIEPTDKVER	14	1	1684.85	P29595	P29595	12	25	Nedd8	NEDD8	yes	yes	2;3	0.0023149	65.347	32971000	22558000	10413000	0	0	22558000	9727000	0	0
EIEIIPLQR	9	0	1109.64	Q924B0;O55023	Q924B0	265	273	Impa1	Inositol monophosphatase 1	yes	no	2	0.016472	79.469	31425000	12133000	19292000	0	0	12133000	18022000	0	0
EIELLCQEHGQENDDLVQR	19	0	2324.07	D3YYK8;E9Q6X0;Q8R001	D3YYK8	231	249	Mapre2	Microtubule-associated protein RP/EB family member 2	yes	no	3	0.0028969	23.33	44810000	22742000	22068000	0	0	22742000	20615000	0	0
EIIDLVLDR	9	0	1084.61	P05213;A0A2R8VHF3;P68369	P68369	113	121	Tuba1b;Tuba1a	Tubulin alpha-1B chain;Tubulin alpha-1A chain	no	no	2	1.9298e-14	167.33	2394800000	592610000	733440000	535790000	532990000	592610000	685150000	256570000	263560000
EIISEVQR	8	0	972.524	D3YX85;E9PX52;Q7SIG6	D3YX85	422	429	Asap2	Arf-GAP with SH3 domain, ANK repeat and PH domain-containing protein 2	yes	no	2	0.00011908	132.29	2766300000	1018900000	875720000	414970000	456750000	1018900000	818060000	198710000	225860000
EIKDILIQYDR	11	1	1404.76	P14131	P14131	107	117	Rps16	40S ribosomal protein S16	yes	yes	2;3	1.4983e-08	103.7	798500000	197180000	197860000	329140000	74326000	197180000	184830000	157610000	36754000
EILGTAQSVGCNVDGR	16	0	1674.8	P35979	P35979	131	146	Rpl12	60S ribosomal protein L12	yes	yes	2;3	0.00028919	62.408	940270000	304840000	302450000	182810000	150170000	304840000	282540000	87541000	74258000
EILMLKQTK	9	1	1102.64	J3QM38	J3QM38	169	177	Gm4944		yes	yes	2	0.0026418	71.501	0	0	0	0	0	0	0	0	0
EILSEVER	8	0	973.508	P80318;E9Q133;Q3U0I3;F6Q609	P80318	382	389	Cct3	T-complex protein 1 subunit gamma	yes	no	2	0.014461	109.86	49844000	26121000	23722000	0	0	26121000	22160000	0	0
EILVGDVGQTVDDPYTTFVK	20	0	2195.1	P18760;F8WGL3;A0A494B9A7	P18760	54	73	Cfl1	Cofilin-1	yes	no	2	4.1854e-06	80.469	345930000	0	0	159510000	186420000	0	0	76382000	92184000
EIQVQHPAAK	10	0	1119.6	P80318;Q3U0I3	P80318	69	78	Cct3	T-complex protein 1 subunit gamma	yes	no	2	0.004089	107.66	44732000	18008000	26724000	0	0	18008000	24965000	0	0
EIRPALELLEPIEQK	15	1	1777	Q61598;A0A1Y7VLG4	Q61598	365	379	Gdi2	Rab GDP dissociation inhibitor beta	yes	no	3	0.0012151	48.823	83819000	30798000	53021000	0	0	30798000	49530000	0	0
EITALAPSTMK	11	0	1160.61	P60710;E9Q1F2;F8WGM8;P63260;B1ATY1;P68134;P68033;P63268;P62737	P63260	316	326	Actb;Actg1;Acta1;Actc1;Actg2;Acta2	Actin, cytoplasmic 1;Actin, cytoplasmic 1, N-terminally processed;Actin, cytoplasmic 2;Actin, cytoplasmic 2, N-terminally processed;Actin, alpha skeletal muscle;Actin, alpha cardiac muscle 1;Actin, gamma-enteric smooth muscle;Actin, aortic smooth muscle	no	no	2	0.00074408	98.048	2939700000	708190000	618260000	832170000	781120000	708190000	577560000	398490000	386260000
EIVDAAEDYAK	11	0	1222.57	Q922B2;Q8BJY7	Q922B2	16	26	Dars	Aspartate--tRNA ligase, cytoplasmic	yes	no	2	0.0047091	65.347	65597000	31488000	34109000	0	0	31488000	31863000	0	0
EIVHLQAGQCGNQIGAK	17	0	1821.92	P68372;Q9D6F9	P68372	3	19	Tubb4b;Tubb4a	Tubulin beta-4B chain;Tubulin beta-4A chain	no	no	2;3	3.6374e-82	196.16	20788000000	4275300000	4526300000	5822500000	6164200000	4275300000	4228300000	2788100000	3048200000
EIVLADVIDNDSWR	14	0	1643.82	Q9DCL9	Q9DCL9	202	215	Paics	Multifunctional protein ADE2;Phosphoribosylaminoimidazole-succinocarboxamide synthase;Phosphoribosylaminoimidazole carboxylase	yes	yes	2	0.0017579	62.303	50139000	0	0	24126000	26013000	0	0	11553000	12863000
EIYTHFTCATDTK	13	0	1585.71	P08752;B2RSH2	P08752	319	331	Gnai2;Gnai1	Guanine nucleotide-binding protein G(i) subunit alpha-2;Guanine nucleotide-binding protein G(i) subunit alpha-1	yes	no	3	0.0028096	50.843	13397000	8134100	5262900	0	0	8134100	4916400	0	0
EKDDAPVADGVEKK	14	2	1499.75	P06837	P06837	68	81	Gap43	Neuromodulin	yes	yes	3	0.0089517	40.278	5925400	5925400	0	0	0	5925400	0	0	0
EKDNIDITLQWLIQHSK	17	1	2080.1	F6QKK2;Q8VEH3;A0A0N4SVB8;Q9CQW2	F6QKK2	145	161	Arl8a;Arl8b	ADP-ribosylation factor-like protein 8A;ADP-ribosylation factor-like protein 8B	yes	no	3	0.00010996	74.772	63669000	0	0	0	63669000	0	0	0	31484000
EKDTAVQGNIR	11	1	1229.64	Q8BFY6	Q8BFY6	250	260	Pef1	Peflin	yes	yes	3	0.015381	40.154	13236000	0	13236000	0	0	0	12365000	0	0
EKDVLEDIPR	10	1	1212.63	A0A668KLC6;P20357;G3UZK9;G3UZE9;F7ALC8	A0A668KLC6	453	462	Map2	Microtubule-associated protein 2	yes	no	3	0.01863	61.161	16001000	8814500	7186800	0	0	8814500	6713600	0	0
EKEPIAASTNR	11	1	1214.63	A3KGU5;A3KGU7;E9Q447;A3KGU9;P16546	A3KGU5	802	812	Sptan1	Spectrin alpha chain, non-erythrocytic 1	yes	no	2	0.030843	76.465	0	0	0	0	0	0	0	0	0
EKFSPLTANLMNLLAENGR	19	1	2117.09	Q9DB20;F7D3P8	Q9DB20	99	117	Atp5o	ATP synthase subunit O, mitochondrial	yes	no	3	0.00063779	48.006	62087000	0	0	62087000	0	0	0	29731000	0
EKGVNSFMVYMAYK	14	1	1665.79	Q3TT92;E9PWE8;Q62188	Q3TT92	156	169	Dpysl3	Dihydropyrimidinase-related protein 3	yes	no	3	0.026043	37.156	24213000	0	0	24213000	0	0	0	11595000	0
EKIETELR	8	1	1016.55	P63101;A0A2I3BQ03	P63101	84	91	Ywhaz	14-3-3 protein zeta/delta	yes	no	2	7.1842e-05	138.26	109040000	0	0	54010000	55025000	0	0	25863000	27210000
EKLEAEMEAAR	11	1	1275.61	Q8R326	Q8R326	301	311	Pspc1	Paraspeckle component 1	yes	yes	2	0.0045726	68.847	44170000	0	44170000	0	0	0	41262000	0	0
EKLEMEMEAAR	11	1	1335.62	Q99K48	Q99K48	296	306	Nono	Non-POU domain-containing octamer-binding protein	yes	yes	3	0.0034791	67.061	81995000	38273000	43722000	0	0	38273000	40844000	0	0
EKLQEEMLQR	10	1	1302.66	P20152;A0A0A6YWC8	P20152	187	196	Vim	Vimentin	yes	no	2	0.003506	98.033	52379000	0	0	23559000	28820000	0	0	11281000	14252000
EKPPITVVGDVGGR	14	1	1422.78	B1AT82;Q9D0M1;Q8R574	B1AT82	266	279	Prpsap1;Prpsap2	Phosphoribosyl pyrophosphate synthase-associated protein 1;Phosphoribosyl pyrophosphate synthase-associated protein 2	yes	no	3	0.0068935	38.511	5513400	0	5513400	0	0	0	5150400	0	0
EKPYFPIPEDCTFIQNVPLEDR	22	1	2706.3	Q8VEK3	Q8VEK3	439	460	Hnrnpu	Heterogeneous nuclear ribonucleoprotein U	yes	yes	3	5.0413e-08	72.99	788730000	0	0	440710000	348020000	0	0	211040000	172090000
EKVESELR	8	1	988.519	P68254	P68254	84	91	Ywhaq	14-3-3 protein theta	yes	yes	2	0.042441	75.738	6233700	6233700	0	0	0	6233700	0	0	0
ELAEDGYSGVEVR	13	0	1422.66	P62908;D3YV43;A0A140LI77	P62908	28	40	Rps3	40S ribosomal protein S3	yes	no	2	0.00012529	97.456	795160000	371740000	338400000	40579000	44434000	371740000	316120000	19432000	21973000
ELAEQTLNNVK	11	0	1257.66	Q91VR5	Q91VR5	297	307	Ddx1	ATP-dependent RNA helicase DDX1	yes	yes	2	2.3021e-07	125.82	96474000	48162000	48312000	0	0	48162000	45132000	0	0
ELAGHTGYLSCCR	13	0	1522.67	P62874;H3BKR2	P62874	138	150	Gnb1	Guanine nucleotide-binding protein G(I)/G(S)/G(T) subunit beta-1	yes	no	2;3	0.00030714	115.18	267450000	37253000	34139000	160020000	36033000	37253000	31892000	76627000	17818000
ELAMPGEDLK	10	0	1101.54	Q8BFR5	Q8BFR5	396	405	Tufm	Elongation factor Tu, mitochondrial	yes	yes	2	0.0083326	76.827	12172000	0	12172000	0	0	0	11370000	0	0
ELAPYDENWFYTR	13	0	1702.76	Q9CZX8;D3YUT3;D3Z5R8;D3Z722;D3YUG3;S4R223	Q9CZX8	44	56	Rps19	40S ribosomal protein S19	yes	no	2	0.003734	57.348	148840000	0	0	69890000	78947000	0	0	33468000	39039000
ELAQQIQK	8	0	956.529	P60843;Q8BTU6;P10630;A0A338P6X5	P60843	111	118	Eif4a1;Eif4a2	Eukaryotic initiation factor 4A-I;Eukaryotic initiation factor 4A-II;Eukaryotic initiation factor 4A-II, N-terminally processed	yes	no	2	0.023832	98.415	149660000	35518000	35471000	34887000	43779000	35518000	33136000	16706000	21649000
ELAQQVQQVAAEYCR	15	0	1791.86	Q8BTS0;Q61656;S4R1I6	Q8BTS0	178	192	Ddx5	Probable ATP-dependent RNA helicase DDX5	yes	no	2;3	0.00014904	80.632	420930000	109310000	85124000	126700000	99802000	109310000	79520000	60671000	49352000
ELAQQVQQVADDYGK	15	0	1690.82	Q3U741;Q501J6;Q3TU25	Q3U741	176	190	Ddx17	Probable ATP-dependent RNA helicase DDX17	yes	no	2	1.65e-24	145.91	630190000	0	129190000	229410000	271580000	0	120690000	109860000	134300000
ELATVLSDQPGLLGPK	16	0	1636.9	A2AS98;P28660	A2AS98	358	373	Nckap1	Nck-associated protein 1	yes	no	2	0.00040582	97.734	165710000	34342000	48661000	36171000	46540000	34342000	45457000	17321000	23014000
ELDALDANDELTPLGR	16	0	1740.85	A0A087WPL5;E9QNN1;O70133	A0A087WPL5	840	855	Dhx9	ATP-dependent RNA helicase A	yes	no	2	0.0013256	59.542	90845000	90845000	0	0	0	90845000	0	0	0
ELDLPEELVSR	11	0	1298.67	Q3THK7	Q3THK7	425	435	Gmps	GMP synthase [glutamine-hydrolyzing]	yes	yes	2	0.0058933	72.006	160430000	72651000	87774000	0	0	72651000	81995000	0	0
ELDQWIEQLNECK	13	0	1703.78	P63330	P63330	9	21	Ppp2ca	Serine/threonine-protein phosphatase 2A catalytic subunit alpha isoform	yes	yes	2	1.4346e-21	148.32	472750000	0	26232000	226310000	220210000	0	24505000	108370000	108890000
ELDQWVEQLNECK	13	0	1689.77	P62715	P62715	9	21	Ppp2cb	Serine/threonine-protein phosphatase 2A catalytic subunit beta isoform	yes	yes	2	3.3232e-21	143.89	301500000	0	0	146390000	155110000	0	0	70102000	76700000
ELDSITPDITPGWK	14	0	1570.79	Q8CAQ8;E9QAY6;E9Q800;A0A0U1RP81	Q8CAQ8	371	384	Immt	MICOS complex subunit Mic60	yes	no	2	0.010064	45.359	34785000	13736000	21049000	0	0	13736000	19663000	0	0
ELDTVTLEDIK	11	0	1274.66	P14685	P14685	62	72	Psmd3	26S proteasome non-ATPase regulatory subunit 3	yes	yes	2	0.0040549	73.985	17867000	0	17867000	0	0	0	16691000	0	0
ELDTVTLEDIKEHVR	15	1	1795.93	P14685	P14685	62	76	Psmd3	26S proteasome non-ATPase regulatory subunit 3	yes	yes	4	0.028602	43.548	8004000	0	8004000	0	0	0	7477000	0	0
ELEASEELDTICPK	14	0	1632.76	A0A1B0GT04;A0A1B0GS58;Q9CQM9	A0A1B0GT04	95	108	Glrx3	Glutaredoxin-3	yes	no	2	0.002278	60.518	45733000	23286000	22447000	0	0	23286000	20969000	0	0
ELEEDFIR	8	0	1049.5	Q9CQI6	Q9CQI6	119	126	Cotl1	Coactosin-like protein	yes	yes	2	0.00063987	130.04	26492000	14040000	12452000	0	0	14040000	11632000	0	0
ELEEIVQPIISK	12	0	1396.78	P20029	P20029	623	634	Hspa5	78 kDa glucose-regulated protein	yes	yes	2	9.8444e-08	125.97	450230000	55441000	73394000	152110000	169290000	55441000	68562000	72838000	83713000
ELEEYRR	7	1	993.488	F8WHZ9;F8WGR0;Q9QYC0;E9Q1K3;F6RDR0;A0A0J9YVI4	F8WHZ9	602	608	Add1	Alpha-adducin	yes	no	2	0.031686	68.422	0	0	0	0	0	0	0	0	0
ELEFYLR	7	0	968.497	P62242	P62242	194	200	Rps8	40S ribosomal protein S8	yes	yes	2	0.026159	118.06	71358000	0	15969000	26672000	28716000	0	14918000	12772000	14200000
ELEQLFSQYGR	11	0	1368.67	B1AXZ0;Q80UJ0;Q3UR02;Q80Y51;B1AXZ6;B1AXZ4;B1AXZ5;Q60899	B1AXZ0	140	150	Elavl2	ELAV-like protein;ELAV-like protein 2	no	no	2	2.5434e-07	125.16	52390000	0	0	0	52390000	0	0	0	25907000
ELETVCNDVLALLDK	15	0	1730.88	P68510	P68510	92	106	Ywhah	14-3-3 protein eta	yes	yes	2	0.0008019	99.752	459510000	0	0	244710000	214800000	0	0	117180000	106220000
ELEVAESDGQVELER	15	0	1701.81	Q61081;A0A1L1STC0	Q61081	70	84	Cdc37	Hsp90 co-chaperone Cdc37;Hsp90 co-chaperone Cdc37, N-terminally processed	yes	no	2	0.00025401	51.092	0	0	0	0	0	0	0	0	0
ELEVLLMCNK	10	0	1247.63	P62911	P62911	84	93	Rpl32	60S ribosomal protein L32	yes	yes	2	5.9892e-06	130.27	285710000	37688000	43217000	120980000	83834000	37688000	40371000	57930000	41456000
ELEVQHPAAK	10	0	1120.59	P42932;H3BL49;H3BLL1;H3BKG2	P42932	75	84	Cct8	T-complex protein 1 subunit theta	yes	no	2	0.0047127	87.251	166820000	20841000	21732000	57603000	66644000	20841000	20301000	27584000	32955000
ELFEPYGAVYQINVLR	16	0	1909.99	A0A0R4J2B0;V9GX43;S4R2U7;S4R1S7;E9QA47;Q9Z0H4;S4R2J2;S4R2L5;A3KGT0	A0A0R4J2B0	34	49	Celf2	CUGBP Elav-like family member 2	yes	no	2;3	0.00040025	94.801	124670000	0	0	75489000	49182000	0	0	36148000	24320000
ELFVNADLYIVAGR	14	0	1578.84	Q6P542	Q6P542	309	322	Abcf1	ATP-binding cassette sub-family F member 1	yes	yes	3	0.01219	24.558	139320000	0	0	139320000	0	0	0	66712000	0
ELGGEVFYVGPAR	13	0	1392.7	A0A0R4IZX5;P55066	A0A0R4IZX5	256	268	Ncan	Neurocan core protein	yes	no	2	0.00044772	91.584	229440000	0	0	120360000	109080000	0	0	57634000	53941000
ELGHPEIGDAIAR	13	0	1376.7	A0A0G2JEA5;Q920E5;A0A0G2JDJ5;A0A0G2JEB3	A0A0G2JEA5	99	111	Fdps	Farnesyl pyrophosphate synthase	yes	no	2	0.015964	43.77	62247000	30802000	31446000	0	0	30802000	29375000	0	0
ELGITALHIK	10	0	1093.65	P62264;D3YVF4;D3Z7I1	P62264	87	96	Rps14	40S ribosomal protein S14	yes	no	2;3	0.0075587	78.334	325290000	31158000	24915000	144030000	125190000	31158000	23275000	68969000	61906000
ELGIWEPLAVK	11	0	1253.7	P80318;E9Q133;Q3U0I3;F6ZVG8	P80318	492	502	Cct3	T-complex protein 1 subunit gamma	yes	no	2	0.00056416	101.11	309160000	0	147460000	80665000	81033000	0	137760000	38627000	40071000
ELGLNPEK	8	0	898.476	Q8CAY6;G3XA25;Q80X81;A0A3B2WAL8	Q8CAY6	334	341	Acat2;Acat3	Acetyl-CoA acetyltransferase, cytosolic	yes	no	2	0.036937	82.241	80529000	32530000	47999000	0	0	32530000	44839000	0	0
ELGSECGIEFDEEK	14	0	1640.69	O54734	O54734	125	138	Ddost	Dolichyl-diphosphooligosaccharide--protein glycosyltransferase 48 kDa subunit	yes	yes	2	0.005487	51.927	30803000	15855000	14949000	0	0	15855000	13964000	0	0
ELGVGLALR	9	0	926.555	Q05816	Q05816	25	33	Fabp5	Fatty acid-binding protein, epidermal	yes	yes	2	0.004782	113.1	51683000	23976000	27707000	0	0	23976000	25883000	0	0
ELHGQSPVVTPCNK	14	0	1564.77	H3BJ30;H3BJW3;Q6NVF9	H3BJ30	148	161	Cpsf6	Cleavage and polyadenylation specificity factor subunit 6	yes	no	2;3	0.00032756	101.39	247180000	0	0	208080000	39090000	0	0	99643000	19330000
ELHINLIPSK	10	0	1162.67	P07901;B7ZC50;A2A6A2;B7ZC49	P07901	75	84	Hsp90aa1	Heat shock protein HSP 90-alpha	yes	no	2;3	0.0041266	94.692	258900000	25601000	60409000	87933000	84958000	25601000	56432000	42107000	42012000
ELHINLIPSKQDR	13	1	1561.86	P07901;B7ZC50;A2A6A2;B7ZC49	P07901	75	87	Hsp90aa1	Heat shock protein HSP 90-alpha	yes	no	2;3	6.8607e-05	113.47	125750000	0	0	59947000	65802000	0	0	28706000	32539000
ELIEQLQNKPSDLGTK	16	1	1811.96	Q60864	Q60864	154	169	Stip1	Stress-induced-phosphoprotein 1	yes	yes	3	0.00033769	87.148	77564000	0	0	39521000	38042000	0	0	18925000	18812000
ELIFEETAR	9	0	1106.56	P63085;A0A338P736;A0A338P781	P63085	343	351	Mapk1	Mitogen-activated protein kinase 1	yes	no	2	0.030637	68.224	19267000	19267000	0	0	0	19267000	0	0	0
ELISNASDALDK	12	0	1274.64	P11499;E9PX27;D3Z1R1;P08113	P11499	42	53	Hsp90ab1;Hsp90b1	Heat shock protein HSP 90-beta;Endoplasmin	no	no	2	0.0005944	105.86	641580000	423120000	0	113980000	104480000	423120000	0	54578000	51667000
ELISNASDALDKIR	14	1	1543.82	P11499;E9PX27;D3Z1R1;P08113	P11499	42	55	Hsp90ab1;Hsp90b1	Heat shock protein HSP 90-beta;Endoplasmin	no	no	2;3	1.0806e-68	157.56	1480300000	17855000	65135000	695080000	702270000	17855000	60846000	332850000	347270000
ELISNSSDALDK	12	0	1290.63	P07901;B7ZC50;A2A6A2;B7ZC49	P07901	47	58	Hsp90aa1	Heat shock protein HSP 90-alpha	yes	no	2	0.0021107	72.2	570620000	186680000	156540000	0	227400000	186680000	146240000	0	112450000
ELISNSSDALDKIR	14	1	1559.82	P07901;B7ZC50;A2A6A2;B7ZC49	P07901	47	60	Hsp90aa1	Heat shock protein HSP 90-alpha	yes	no	2;3	3.4165e-36	136.3	462710000	0	0	243230000	219470000	0	0	116470000	108530000
ELLGQGLLLR	10	0	1110.68	Q8R1B4	Q8R1B4	642	651	Eif3c	Eukaryotic translation initiation factor 3 subunit C	yes	yes	2	0.0080987	77.282	7147100	0	7147100	0	0	0	6676600	0	0
ELLLQPVTISR	11	0	1267.75	P59999	P59999	45	55	Arpc4	Actin-related protein 2/3 complex subunit 4	yes	yes	2	3.7995e-12	138.66	472600000	119970000	123260000	115440000	113930000	119970000	115150000	55277000	56340000
ELLLSQPGTAANIPSHVTR	19	0	2003.08	I7HPB1;I7HFU4;B2FDF6;Q8R570;J3JS29	I7HPB1	100	118	Snap47	Synaptosomal-associated protein 47	yes	no	3	0.025888	26.837	55594000	22885000	32708000	0	0	22885000	30555000	0	0
ELLLTGPGLEER	12	0	1325.72	E9PV22;Q505F5	E9PV22	47	58	Lrrc47	Leucine-rich repeat-containing protein 47	yes	no	2	0.0026093	66.056	66709000	16044000	0	0	50665000	16044000	0	0	25054000
ELLPLIKPQGR	11	1	1262.77	P48758	P48758	124	134	Cbr1	Carbonyl reductase [NADPH] 1	yes	yes	3	0.018965	50.284	16768000	7404500	9363100	0	0	7404500	8746600	0	0
ELLQQMER	8	0	1045.52	O89112;B2KGR2	O89112	42	49	Lancl1	LanC-like protein 1	yes	no	2	2.73e-05	140.98	83182000	40148000	43034000	0	0	40148000	40201000	0	0
ELLTLDEKDPR	11	1	1327.7	Q6ZWN5;F7CJS8;D3YWH9;Q9CXW7;D3Z673	Q6ZWN5	59	69	Rps9	40S ribosomal protein S9	yes	no	3	0.0043066	59.198	122590000	0	0	0	122590000	0	0	0	60623000
ELLTSFGPLK	10	0	1103.62	Q80XR5;P26369;Q3KQM4	Q80XR5	277	286	U2af2	Splicing factor U2AF 65 kDa subunit	yes	no	2	0.0014877	103.74	302870000	13298000	17381000	141060000	131130000	13298000	16237000	67547000	64844000
ELNDFISYLQR	11	0	1396.7	P27773	P27773	472	482	Pdia3	Protein disulfide-isomerase A3	yes	yes	2	0.001509	84.213	315000000	94554000	102590000	55745000	62112000	94554000	95833000	26694000	30714000
ELPGHTGYLSCCR	13	0	1548.68	P62880;E9QKR0;D3Z1M1;D3YZX3;D3Z1T4;E9PWM7;P29387	P62880	138	150	Gnb2;Gnb4	Guanine nucleotide-binding protein G(I)/G(S)/G(T) subunit beta-2;Guanine nucleotide-binding protein subunit beta-4	yes	no	2	0.0018908	73.067	62023000	0	0	28918000	33105000	0	0	13848000	16371000
ELPQFATGENLPR	13	0	1470.75	O35841	O35841	85	97	Api5	Apoptosis inhibitor 5	yes	yes	2	0.0014267	65.5	143420000	77241000	66180000	0	0	77241000	61823000	0	0
ELQELNELFKPVVAAQK	17	1	1955.07	Q3TIV5	Q3TIV5	77	93	Zc3h15	Zinc finger CCCH domain-containing protein 15	yes	yes	3	0.00037944	60.918	79864000	0	0	0	79864000	0	0	0	39493000
ELQELVQYPVEHPDK	15	0	1822.91	Q01853	Q01853	488	502	Vcp	Transitional endoplasmic reticulum ATPase	yes	yes	2	0.0064824	45.653	34292000	0	0	0	34292000	0	0	0	16957000
ELQEQMSR	8	0	1019.47	A0A087WQS2;Q9CQC6;A0A087WPF9	A0A087WQS2	292	299	Bzw1	Basic leucine zipper and W2 domain-containing protein 1	yes	no	2	0.033179	91.9	3385100	0	3385100	0	0	0	3162200	0	0
ELQTLHNLR	9	0	1122.61	P28738;P33175;Q61768	P28738	793	801	Kif5c;Kif5a;Kif5b	Kinesin heavy chain isoform 5C;Kinesin heavy chain isoform 5A;Kinesin-1 heavy chain	no	no	2	0.040835	71.501	6288900	0	6288900	0	0	0	5874900	0	0
ELSDIAHR	8	0	939.477	A6ZI44;P05064;D3YWI1;Q9CPQ9;A6ZI46;D3Z510;A0A0U1RPN8;D3YV98;A0A0U1RPT5	A6ZI44	69	76	Aldoa;Aldoart1	Fructose-bisphosphate aldolase;Fructose-bisphosphate aldolase A	yes	no	2;3	0.014043	108.24	169730000	53598000	40619000	40453000	35064000	53598000	37945000	19371000	17339000
ELSFAAVSFYHK	12	0	1397.7	P19096;A0A0U1RNJ1	P19096	2408	2419	Fasn	Fatty acid synthase;[Acyl-carrier-protein] S-acetyltransferase;[Acyl-carrier-protein] S-malonyltransferase;3-oxoacyl-[acyl-carrier-protein] synthase;3-oxoacyl-[acyl-carrier-protein] reductase;3-hydroxyacyl-[acyl-carrier-protein] dehydratase;Enoyl-[acyl-carrier-protein] reductase;Oleoyl-[acyl-carrier-protein] hydrolase	yes	no	2;3	0.0050765	60.102	126100000	0	0	57301000	68798000	0	0	27439000	34021000
ELTAVVQK	8	0	886.512	P62908;D3YV43;A0A140LI77	P62908	68	75	Rps3	40S ribosomal protein S3	yes	no	1	0.039108	73.975	204300000	0	0	204300000	0	0	0	97831000	0
ELTNQQEASVER	12	0	1402.67	D3YX34;E9Q586;E9Q3M3;O08788	D3YX34	399	410	Dctn1	Dynactin subunit 1	yes	no	2	0.0037092	73.067	64104000	30760000	33343000	0	0	30760000	31148000	0	0
ELVALMSAIR	10	0	1101.62	P24527	P24527	166	175	Lta4h	Leukotriene A-4 hydrolase	yes	yes	2	0.028582	65.224	5907800	0	5907800	0	0	0	5518800	0	0
ELVFKEDGQEYAQVIK	16	1	1894.97	Q8BMJ3	Q8BMJ3	25	40	Eif1ax	Eukaryotic translation initiation factor 1A, X-chromosomal	no	no	2	0.0059814	48.004	80871000	0	0	37772000	43099000	0	0	18087000	21313000
ELVLDNCK	8	0	989.485	O35381;D3YYE1;D3Z7M9;F6UFG6;Q9EST5	O35381	21	28	Anp32a;Anp32b	Acidic leucine-rich nuclear phosphoprotein 32 family member A;Acidic leucine-rich nuclear phosphoprotein 32 family member B	no	no	2	0.038488	77.741	39380000	39380000	0	0	0	39380000	0	0	0
ELVLNPEGEVSSAK	14	0	1470.76	F6YJB6;V9GXJ1;Q8R4X3	F6YJB6	442	455	Gm28036;Rbm12	RNA-binding protein 12	yes	no	2	0.016644	42.001	18545000	0	18545000	0	0	0	17324000	0	0
ELVSCSNCTDYQAR	14	0	1701.71	Q8C483;P26638	Q8C483	391	404	Sars	Serine--tRNA ligase, cytoplasmic	yes	no	2	0.016644	42.001	67611000	34986000	32625000	0	0	34986000	30477000	0	0
ELVSDANQHVK	11	0	1238.63	Q76MZ3;G3UWL2	Q76MZ3	332	342	Ppp2r1a	Serine/threonine-protein phosphatase 2A 65 kDa regulatory subunit A alpha isoform	yes	no	2	0.0039853	67.563	56353000	25333000	31020000	0	0	25333000	28978000	0	0
ELYPALEGQLK	11	0	1259.68	Q6P5E4;G3UY35	Q6P5E4	292	302	Uggt1	UDP-glucose:glycoprotein glucosyltransferase 1	yes	no	2	0.032082	45.137	11620000	11620000	0	0	0	11620000	0	0	0
EMACPYSVLVSGDIK	15	0	1667.79	Q80VD1	Q80VD1	90	104	Fam98b	Protein FAM98B	yes	yes	2	0.022393	36.447	55298000	0	0	0	55298000	0	0	0	27345000
EMDQTMAANAQK	12	0	1336.58	A0A0R4J093;Q9DBP5	A0A0R4J093	106	117	Cmpk1	UMP-CMP kinase	yes	no	2	0.002392	68.735	135850000	0	0	66789000	69056000	0	0	31983000	34148000
EMDRETLIDVAR	12	1	1446.71	P80317;A0A571BEL9	P80317	142	153	Cct6a	T-complex protein 1 subunit zeta	yes	no	2;3	1.6392e-05	102.62	238050000	20930000	22360000	160310000	34460000	20930000	20888000	76764000	17040000
EMEQLFSQYGR	11	0	1386.62	A0A1L1SS95;Q60900	A0A1L1SS95	139	149	Elavl3	ELAV-like protein 3	yes	no	2	0.0019417	76.465	125040000	0	0	65083000	59958000	0	0	31166000	29649000
EMFPYEASTPTGISASCR	18	0	2002.88	Q61029	Q61029	346	363	Tmpo	Lamina-associated polypeptide 2, isoforms beta/delta/epsilon/gamma	yes	yes	2	0.00012486	57.804	135430000	54787000	0	80642000	0	54787000	0	38616000	0
EMGEAFAADIPR	12	0	1305.6	P17426	P17426	142	153	Ap2a1	AP-2 complex subunit alpha-1	yes	yes	2	0.0026175	62.303	0	0	0	0	0	0	0	0	0
EMGTPLADTPTRPVTR	16	1	1740.88	Q9EQF6	Q9EQF6	506	521	Dpysl5	Dihydropyrimidinase-related protein 5	yes	yes	3	0.00028899	91.076	271580000	126770000	144800000	0	0	126770000	135270000	0	0
EMLAAALR	8	0	873.474	E9PYD5;P10711	E9PYD5	157	164	Tcea1	Transcription elongation factor A protein 1	yes	no	2	0.024818	79.939	0	0	0	0	0	0	0	0	0
EMLSSTTYPVVVK	13	0	1452.75	O88935	O88935	257	269	Syn1	Synapsin-1	yes	yes	2	0.0017088	70.1	96734000	43931000	52803000	0	0	43931000	49326000	0	0
EMMLSIINSSITTK	14	0	1566.8	P80318;E9Q133;Q3U0I3;F6Q609	P80318	150	163	Cct3	T-complex protein 1 subunit gamma	yes	no	2	2.2271e-07	88.441	89944000	26154000	15558000	28128000	20104000	26154000	14534000	13469000	9941300
EMNDAAMFYTNR	12	0	1461.6	P40124	P40124	155	166	Cap1	Adenylyl cyclase-associated protein 1	yes	yes	2	0.026782	43.308	13229000	13229000	0	0	0	13229000	0	0	0
EMQPTHPIR	9	0	1107.55	P63101;P68254;Q9CQV8	P68254	159	167	Ywhaz;Ywhaq;Ywhab	14-3-3 protein zeta/delta;14-3-3 protein theta;14-3-3 protein beta/alpha;14-3-3 protein beta/alpha, N-terminally processed	no	no	2;3	0.0049282	125.81	2774800000	38947000	40111000	1390300000	1305500000	38947000	37471000	665760000	645540000
EMQYFMQQWTGTNK	14	0	1790.78	P14873	P14873	433	446	Map1b	Microtubule-associated protein 1B;MAP1B heavy chain;MAP1 light chain LC1	yes	yes	2;3	0.0039498	54.784	199890000	88149000	111740000	0	0	88149000	104380000	0	0
EMSLYASLASEK	12	0	1327.63	P14873	P14873	1754	1765	Map1b	Microtubule-associated protein 1B;MAP1B heavy chain;MAP1 light chain LC1	yes	yes	2	0.00059578	91.855	254410000	69194000	60661000	58802000	65758000	69194000	56667000	28158000	32517000
EMTLDEWK	8	0	1050.47	Q9CY58;Q3UMP4;A0A0N4SV32	Q9CY58	286	293	Serbp1	Plasminogen activator inhibitor 1 RNA-binding protein	yes	no	2	0.0047018	120.62	100620000	0	0	56561000	44060000	0	0	27085000	21788000
EMVELPLR	8	0	985.527	Q01853	Q01853	218	225	Vcp	Transitional endoplasmic reticulum ATPase	yes	yes	2	0.010658	101.69	3393600	3393600	0	0	0	3393600	0	0	0
EMVLELIR	8	0	1001.56	A0A0G2JG00;Q3TUE1;A0A0G2JGW9;A0A0G2JFY5;Q3UUU2;Q91WJ8;A0A0G2JFK2	A0A0G2JG00	244	251	Fubp1	Far upstream element-binding protein 1	yes	no	2	0.0014007	139.31	25633000	0	0	25633000	0	0	0	12275000	0
EMVQNLMVLR	10	0	1231.64	Q00612;A3KG36;G3UWD6;P97324	Q00612	206	215	G6pdx;G6pd2	Glucose-6-phosphate 1-dehydrogenase X;Glucose-6-phosphate 1-dehydrogenase;Glucose-6-phosphate 1-dehydrogenase 2	yes	no	2	0.02041	74.127	31796000	14747000	17050000	0	0	14747000	15927000	0	0
ENEFSFEDNAIR	12	0	1469.64	E9QAS4;E9PYU4;E9QAS5;E9PYL1;Q6PDQ2;A2A8L1	E9QAS4	798	809	Chd4;Chd5	Chromodomain-helicase-DNA-binding protein 4;Chromodomain-helicase-DNA-binding protein 5	yes	no	2	0.0011865	79.974	47205000	21037000	26168000	0	0	21037000	24445000	0	0
ENIVEAIIHSPELIR	15	0	1731.95	Q9EPL8	Q9EPL8	93	107	Ipo7	Importin-7	yes	yes	3	0.0042125	41.378	10432000	0	0	10432000	0	0	0	4995600	0
ENMAYTVEGIR	11	0	1281.6	Q9DB77;A0A140LI98	Q9DB77	117	127	Uqcrc2	Cytochrome b-c1 complex subunit 2, mitochondrial	yes	no	2	0.00067295	99.257	302400000	0	0	175030000	127370000	0	0	83815000	62984000
ENNLSEEVLGK	11	0	1230.61	I1E4X0;F6YMR0;E9PUF2;B7ZNS2;B1AZP2;H3BJD4	I1E4X0	137	147	Dlgap4	Disks large-associated protein 4	yes	no	2	0.028835	46.819	20912000	20912000	0	0	0	20912000	0	0	0
ENTEGEYSGIEHVIVDGVVQSIK	23	0	2501.23	A0A1L1STE6;Q9D6R2	A0A1L1STE6	165	187	Idh3a	Isocitrate dehydrogenase [NAD] subunit alpha, mitochondrial	yes	no	3	0.0062632	32.391	47263000	0	0	23952000	23311000	0	0	11470000	11527000
ENVIMTQILPCIK	13	0	1557.83	Q76MZ3;G3UWL2	Q76MZ3	319	331	Ppp2r1a	Serine/threonine-protein phosphatase 2A 65 kDa regulatory subunit A alpha isoform	yes	no	2	0.0018908	73.067	79241000	0	0	39266000	39975000	0	0	18803000	19768000
ENVNLAQIR	9	0	1055.57	Q5XJY5	Q5XJY5	123	131	Arcn1	Coatomer subunit delta	yes	yes	2	0.031042	67.981	6223700	6223700	0	0	0	6223700	0	0	0
ENYGELADCCTK	12	0	1458.58	P07724	P07724	106	117	Alb	Serum albumin	yes	yes	2	0.013183	51.092	54148000	26758000	27390000	0	0	26758000	25586000	0	0
EPAAETEALLGMDLVR	16	0	1713.86	Q9CZC8	Q9CZC8	99	114	Scrn1	Secernin-1	yes	yes	2	2.4378e-06	64.55	35674000	0	0	35674000	0	0	0	17083000	0
EPFTVTQGK	9	0	1005.51	Q7TNV0;E9Q8Y1;D3YVJ6	Q7TNV0	80	88	Dek	Protein DEK	yes	no	2	0.01712	78.77	38206000	0	0	0	38206000	0	0	0	18893000
EPMQTGIK	8	0	902.453	Q03265;D3Z6F5	Q03265	187	194	Atp5a1	ATP synthase subunit alpha, mitochondrial;ATP synthase subunit alpha	yes	no	2	0.033179	91.9	85387000	39399000	45988000	0	0	39399000	42961000	0	0
EPWLLASQYQDAIR	14	0	1688.85	Q8BHN3	Q8BHN3	685	698	Ganab	Neutral alpha-glucosidase AB	yes	yes	2	0.034821	46.706	18291000	0	0	0	18291000	0	0	0	9044800
EQCCYNCGKPGHLAR	15	1	1848.78	P53996;A0A0N4SVS6	P53996	96	110	Cnbp	Cellular nucleic acid-binding protein	yes	no	2;3;4	0.00018661	75.589	344600000	80108000	113150000	86341000	65000000	80108000	105700000	41345000	32142000
EQFLDGDAWTNR	12	0	1450.65	P14211	P14211	25	36	Calr	Calreticulin	yes	yes	2	1.7715e-08	130.98	1769900000	0	0	804640000	965230000	0	0	385310000	477300000
EQGNIEEAVR	10	0	1143.55	Q8CGY8	Q8CGY8	339	348	Ogt	UDP-N-acetylglucosamine--peptide N-acetylglucosaminyltransferase 110 kDa subunit	yes	yes	2	0.016567	66.692	7856700	0	7856700	0	0	0	7339400	0	0
EQGVLSFWR	9	0	1120.57	P51881	P51881	64	72	Slc25a5	ADP/ATP translocase 2;ADP/ATP translocase 2, N-terminally processed	yes	yes	2	0.0048874	103.56	139790000	63932000	75860000	0	0	63932000	70866000	0	0
EQILEEFSK	9	0	1121.56	G3UZI2;A0A0R4J259;G3V018;Q7TMK9;G3UZ48	G3UZI2	257	265	Syncrip	Heterogeneous nuclear ribonucleoprotein Q	yes	no	2	0.042227	66.621	11150000	11150000	0	0	0	11150000	0	0	0
EQISDIDDAVR	11	0	1259.6	P11031	P11031	115	125	Sub1	Activated RNA polymerase II transcriptional coactivator p15	yes	yes	2	9.2384e-05	114.5	682470000	79922000	86190000	258970000	257390000	79922000	80516000	124010000	127280000
EQIVPKPEEEVAQK	14	1	1622.85	Q6ZWZ7;Q9CPR4;B2RY53	Q6ZWZ7	154	167	Rpl17;Gm6133	60S ribosomal protein L17	yes	no	2;3	0.013123	44.188	105180000	0	105180000	0	0	0	98259000	0	0
EQIVPKPEEEVAQKK	15	2	1750.95	Q6ZWZ7;Q9CPR4;B2RY53	Q6ZWZ7	154	168	Rpl17;Gm6133	60S ribosomal protein L17	yes	no	3	0.031536	39.509	8919600	0	8919600	0	0	0	8332300	0	0
EQIYDVYR	8	0	1084.52	Q91VC3;A2AFK7;A0A0N4SVP8;E9PV04;A0A0N4SVM5	Q91VC3	199	206	Eif4a3;Gm8994	Eukaryotic initiation factor 4A-III;Eukaryotic initiation factor 4A-III, N-terminally processed	yes	no	2	0.0291	65.252	0	0	0	0	0	0	0	0	0
EQLAIAEFAR	10	0	1146.6	P11983	P11983	434	443	Tcp1	T-complex protein 1 subunit alpha	yes	yes	2	0.0048637	85.731	124300000	52402000	71896000	0	0	52402000	67162000	0	0
EQLDNQLDAYMSK	13	0	1553.7	E9PW20;Q9CY57	E9PW20	169	181	Chtop	Chromatin target of PRMT1 protein	yes	no	2	0.0013117	69.349	1700300000	133550000	144980000	689520000	732230000	133550000	135430000	330180000	362080000
EQLDPDELETITMHK	15	0	1797.85	Q6P5E4;G3UYG7	Q6P5E4	644	658	Uggt1	UDP-glucose:glycoprotein glucosyltransferase 1	yes	no	3	0.0074006	28.58	20799000	20799000	0	0	0	20799000	0	0	0
EQLEEQASQHR	11	0	1353.63	Q9Z0H8	Q9Z0H8	706	716	Clip2	CAP-Gly domain-containing linker protein 2	yes	yes	2	0.027322	47.603	19994000	0	19994000	0	0	0	18678000	0	0
EQLMNSSLGSGTASLR	16	0	1649.8	A0A338P6E5;G3UZL5;A0A338P6I6;Q62108	A0A338P6E5	349	364	Dlg4	Disks large homolog 4	yes	no	2	0.003807	48.004	35165000	17423000	17742000	0	0	17423000	16574000	0	0
EQMKMEAAER	10	1	1221.55	F7AL76;Q09XV5	F7AL76	425	434	Chd8	Chromodomain-helicase-DNA-binding protein 8	yes	no	2	0.0024925	65.252	0	0	0	0	0	0	0	0	0
EQPWVSVQPR	10	0	1224.63	Q9JHU4	Q9JHU4	1346	1355	Dync1h1	Cytoplasmic dynein 1 heavy chain 1	yes	yes	2	0.015276	68.016	63194000	29890000	33304000	0	0	29890000	31111000	0	0
EQSILELGSLLAK	13	0	1399.79	Q8BG32;G3UYI4;G3UYL3;G3UX67;G3UWV7;G3UYL8;G3UX15	Q8BG32	47	59	Psmd11	26S proteasome non-ATPase regulatory subunit 11	yes	no	2	0.0096135	49.5	50725000	28237000	22487000	0	0	28237000	21007000	0	0
EQSQLTATQTR	11	0	1261.63	Q99PV0	Q99PV0	2035	2045	Prpf8	Pre-mRNA-processing-splicing factor 8	yes	yes	2	0.02919	43.512	18064000	0	18064000	0	0	0	16875000	0	0
EQTAHAFVNVLTR	13	0	1484.77	P19096;A0A0U1RNJ1	P19096	1519	1531	Fasn	Fatty acid synthase;[Acyl-carrier-protein] S-acetyltransferase;[Acyl-carrier-protein] S-malonyltransferase;3-oxoacyl-[acyl-carrier-protein] synthase;3-oxoacyl-[acyl-carrier-protein] reductase;3-hydroxyacyl-[acyl-carrier-protein] dehydratase;Enoyl-[acyl-carrier-protein] reductase;Oleoyl-[acyl-carrier-protein] hydrolase	yes	no	3	0.016512	35.809	7074600	0	7074600	0	0	0	6608800	0	0
EQVANSAFVER	11	0	1248.61	P11499;E9Q0C3	P11499	492	502	Hsp90ab1	Heat shock protein HSP 90-beta	yes	no	2	0.00016777	111.06	2023100000	243030000	294520000	786820000	698760000	243030000	275130000	376770000	345540000
EQWEPVFQDGK	11	0	1361.63	P97376	P97376	136	146	Frg1	Protein FRG1	yes	yes	2	0.0035659	68.847	178090000	0	0	119090000	58999000	0	0	57029000	29175000
EREQQIEEHRR	11	2	1508.74	A0A0R4J1E3;Q9QXS6	A0A0R4J1E3	227	237	Dbn1	Drebrin	yes	no	4	0.0071383	44.299	8486500	0	0	0	8486500	0	0	0	4196600
ERHDELSYF	9	1	1194.53	Q62426	Q62426	90	98	Cstb	Cystatin-B	yes	yes	3	0.035649	52.579	26498000	0	26498000	0	0	0	24754000	0	0
ERHPGSFDVVHVK	13	1	1505.77	P62702;V9GWY0	P62702	199	211	Rps4x;Gm15013	40S ribosomal protein S4, X isoform;40S ribosomal protein S4	yes	no	2;3;4	2.0461e-28	134.88	2795200000	9769100	138070000	1226600000	1420900000	9769100	128980000	587340000	702610000
ERPGSTGEGDLVSLR	15	1	1571.79	Q3UNH4	Q3UNH4	215	229	Gprin1	G protein-regulated inducer of neurite outgrowth 1	yes	yes	3	0.0065713	32.815	2974200	0	2974200	0	0	0	2778400	0	0
ESDLSGAQIK	10	0	1046.52	P14733	P14733	126	135	Lmnb1	Lamin-B1	yes	yes	2	0.025734	57.931	15638000	7155800	8482100	0	0	7155800	7923700	0	0
ESESAPGDFSLSVK	14	0	1451.68	B1AT92;Q60631	B1AT92	87	100	Grb2	Growth factor receptor-bound protein 2	yes	no	2	0.028642	37.968	42776000	0	42776000	0	0	0	39960000	0	0
ESESCDCLQGFQLTHSLGGGTGSGMGTLLISK	32	0	3326.52	Q7TMM9;Q9CWF2	Q9CWF2	123	154	Tubb2a;Tubb2b	Tubulin beta-2A chain;Tubulin beta-2B chain	no	no	3;4	1.0165e-05	37.021	761400000	0	0	761400000	0	0	0	364600000	0
ESESVDKVMDQK	12	1	1393.64	Q60668;F6ZV59;G5E8G0;G3X9W0;E9Q5B6	Q60668	147	158	Hnrnpd	Heterogeneous nuclear ribonucleoprotein D0	yes	no	2;3	3.3639e-05	119.34	241630000	0	8356500	29233000	204040000	0	7806400	13999000	100900000
ESKKEDLVFIFWAPENAPLK	20	2	2360.24	P18760;F8WGL3;A0A494B9A7	P18760	93	112	Cfl1	Cofilin-1	yes	no	3;4	2.337e-05	64.26	887130000	0	0	470940000	416190000	0	0	225510000	205810000
ESLKPATKPVASK	13	2	1354.78	P14873	P14873	543	555	Map1b	Microtubule-associated protein 1B;MAP1B heavy chain;MAP1 light chain LC1	yes	yes	2;3;4	0.0022154	60.167	1674000000	123280000	34885000	1337400000	178410000	123280000	32589000	640410000	88225000
ESLTEVSETVTQHK	14	0	1586.78	Q99P72	Q99P72	747	760	Rtn4	Reticulon-4	yes	yes	2;3	0.001834	67.726	94162000	55066000	39096000	0	0	55066000	36522000	0	0
ESNPALGIDCLHK	13	0	1452.7	P80316	P80316	484	496	Cct5	T-complex protein 1 subunit epsilon	yes	yes	2;3	0.00057258	74.751	328980000	16721000	47557000	140030000	124680000	16721000	44426000	67052000	61654000
ESTNIFSPSDSLK	13	0	1423.68	P28658	P28658	346	358	Atxn10	Ataxin-10	yes	yes	2	0.0041092	56.404	75652000	33736000	41916000	0	0	33736000	39156000	0	0
ESVFTVEGGHR	11	0	1216.58	O35129	O35129	38	48	Phb2	Prohibitin-2	yes	yes	3	0.022586	39.266	6409000	6409000	0	0	0	6409000	0	0	0
ESVVSGDDRAEEDMDDVLEK	20	1	2236.96	P14873	P14873	988	1007	Map1b	Microtubule-associated protein 1B;MAP1B heavy chain;MAP1 light chain LC1	yes	yes	3	0.033133	30.428	13647000	13647000	0	0	0	13647000	0	0	0
ETAAAHQASSSPPIDAATAEPYGFR	25	0	2544.19	P14873	P14873	1805	1829	Map1b	Microtubule-associated protein 1B;MAP1B heavy chain;MAP1 light chain LC1	yes	yes	3	1.2121e-11	40.986	138580000	0	138580000	0	0	0	129460000	0	0
ETAAVIFLHGLGDTGHSWADALSTIR	26	0	2737.38	Q9WTL7	Q9WTL7	23	48	Lypla2	Acyl-protein thioesterase 2	yes	yes	4	8.0119e-12	86.006	42287000	0	0	0	42287000	0	0	0	20911000
ETECTYFSTPLLLGK	15	0	1757.85	P08249	P08249	282	296	Mdh2	Malate dehydrogenase, mitochondrial	yes	yes	2	0.0014523	65.5	334720000	124130000	0	115130000	95458000	124130000	0	55132000	47204000
ETFLTSPEELYR	12	0	1483.72	Q8BK64	Q8BK64	213	224	Ahsa1	Activator of 90 kDa heat shock protein ATPase homolog 1	yes	yes	2	0.0007489	85.256	27223000	0	27223000	0	0	0	25431000	0	0
ETIDAVPNAIPGR	13	0	1351.71	Q9JMD0;B1AQG7;Q8CCB2	Q9JMD0	60	72	Znf207;Zfp207	BUB3-interacting and GLEBS motif-containing protein ZNF207	yes	no	2	0.00017628	111.61	277060000	0	141780000	135290000	0	0	132440000	64783000	0
ETLAQLQQEFQR	12	0	1489.75	G3UYF9;Q03958	G3UYF9	80	91	Pfdn6	Prefoldin subunit 6	yes	no	2	0.00070841	103.7	32851000	0	32851000	0	0	0	30688000	0	0
ETLEEVFEK	9	0	1122.54	P09405	P09405	501	509	Ncl	Nucleolin	yes	yes	2	0.025422	79.906	95154000	0	0	46108000	49046000	0	0	22079000	24253000
ETLLNSATTSLNSK	14	0	1477.76	P80315;G5E839	P80315	161	174	Cct4	T-complex protein 1 subunit delta	yes	no	2	0.00055098	87.363	388590000	116430000	122130000	70318000	79719000	116430000	114090000	33672000	39421000
ETNLESLPLVDTHSK	15	0	1681.85	P20152	P20152	425	439	Vim	Vimentin	yes	yes	3	0.0014235	51.606	115990000	60734000	55257000	0	0	60734000	51619000	0	0
ETQALILAPTR	11	0	1211.69	Q91VC3;A0A0N4SVP8;E9PV04	Q91VC3	106	116	Eif4a3;Gm8994	Eukaryotic initiation factor 4A-III;Eukaryotic initiation factor 4A-III, N-terminally processed	yes	no	2	0.0019148	76.943	42059000	21364000	20695000	0	0	21364000	19332000	0	0
ETQPGEAYVIQK	12	0	1361.68	P14873	P14873	866	877	Map1b	Microtubule-associated protein 1B;MAP1B heavy chain;MAP1 light chain LC1	yes	yes	2	0.0020748	72.643	155750000	0	0	68689000	87059000	0	0	32892000	43051000
ETVDSFLDLLR	11	0	1306.68	Q5SSP3;O35874	Q5SSP3	86	96	Slc1a4	Amino acid transporter;Neutral amino acid transporter A	yes	no	2	0.0065651	66.435	11931000	0	0	11931000	0	0	0	5713500	0
ETVSEESNVLCLSK	14	0	1593.76	P58252	P58252	581	594	Eef2	Elongation factor 2	yes	yes	2	0.00095482	91.937	792750000	384300000	408440000	0	0	384300000	381550000	0	0
ETVVEVPQVTWEDIGGLEDVKR	22	1	2497.27	Q01853	Q01853	466	487	Vcp	Transitional endoplasmic reticulum ATPase	yes	yes	3	2.6936e-07	55.575	168310000	0	0	71048000	97262000	0	0	34022000	48096000
ETVVTSTTEPSR	12	0	1305.64	O08795	O08795	481	492	Prkcsh	Glucosidase 2 subunit beta	yes	yes	2	0.00027023	87.298	116820000	0	0	60267000	56557000	0	0	28859000	27967000
EVAYLGNEVSDEECLKR	17	1	2009.94	A0A0R4J0B4;Q99KK2	A0A0R4J0B4	365	381	Cmas	N-acylneuraminate cytidylyltransferase	yes	no	3	0.00021812	40.014	0	0	0	0	0	0	0	0	0
EVCGFAPYER	10	0	1226.54	Q6ZWZ4;P47964	Q6ZWZ4	46	55	Rpl36	60S ribosomal protein L36	yes	no	2	0.0047704	86.67	348920000	99765000	105730000	71847000	71577000	99765000	98769000	34404000	35395000
EVDDLGPEVGDIK	13	0	1384.67	O35286;Q497W9;A0A0G2JG10;A0A0G2JGQ5	O35286	372	384	Dhx15	Pre-mRNA-splicing factor ATP-dependent RNA helicase DHX15	yes	no	2	0.0034359	75.387	256130000	0	0	124160000	131970000	0	0	59457000	65257000
EVDEKPASTPWGSK	14	1	1529.74	Q9R0Q6;A0A0G2JF52	Q9R0Q6	175	188	Arpc1a	Actin-related protein 2/3 complex subunit 1A	yes	no	2	0.036626	37.995	23911000	0	0	0	23911000	0	0	0	11824000
EVDEQMLAIQSK	12	0	1389.68	Q9ERD7	Q9ERD7	325	336	Tubb3	Tubulin beta-3 chain	yes	yes	2	0.00063913	94.297	3410600000	1309900000	1156400000	944280000	0	1309900000	1080300000	452170000	0
EVDEQMLNVQNK	12	0	1445.68	P68372;P99024;Q7TMM9;Q9CWF2	P68372	325	336	Tubb4b;Tubb5;Tubb2a;Tubb2b	Tubulin beta-4B chain;Tubulin beta-5 chain;Tubulin beta-2A chain;Tubulin beta-2B chain	no	no	2;3	5.5188e-13	122.19	20054000000	6579000000	6495200000	3322600000	3657300000	6579000000	6067600000	1591000000	1808500000
EVDEQMLSVQSK	12	0	1391.66	Q9D6F9	Q9D6F9	325	336	Tubb4a	Tubulin beta-4A chain	yes	yes	2	0.00063631	90.108	352440000	176580000	175860000	0	0	176580000	164280000	0	0
EVDIYTVK	8	0	965.507	A0A171KXD3;Q9JIF0;A0A140LHF7;A0A140LJF4;Q6PAK3	A0A171KXD3	201	208	Prmt1;Prmt8	Protein arginine N-methyltransferase 1;Protein arginine N-methyltransferase 8	yes	no	2	0.037892	79.469	90459000	0	0	0	90459000	0	0	0	44732000
EVESIGAHLNAYSTR	15	0	1645.81	Q9CZ13;A0A0A6YW82	Q9CZ13	112	126	Uqcrc1	Cytochrome b-c1 complex subunit 1, mitochondrial	yes	no	3	0.00039162	64.65	11045000	0	11045000	0	0	0	10318000	0	0
EVFEMATR	8	0	981.459	Q9QUI0;Q62159	Q9QUI0	169	176	Rhoa;Rhoc	Transforming protein RhoA;Rho-related GTP-binding protein RhoC	yes	no	2	0.036037	62.88	0	0	0	0	0	0	0	0	0
EVFSMAGVVVR	11	0	1192.63	Q9D0E1;B8JK33;B8JK32;F6W322;A0A3Q4EH91	Q9D0E1	221	231	Hnrnpm	Heterogeneous nuclear ribonucleoprotein M	yes	no	2	0.012402	56.729	10097000	10097000	0	0	0	10097000	0	0	0
EVGKDVSDEKLR	12	2	1373.72	Q9CZU6	Q9CZU6	318	329	Cs	Citrate synthase, mitochondrial	yes	yes	2;3;4	0.004011	108.7	271860000	0	9907200	159040000	102910000	0	9254900	76156000	50890000
EVLADRPLFPHVLCHNCAVEFNFGQK	26	1	3096.51	Q8VEK3	Q8VEK3	413	438	Hnrnpu	Heterogeneous nuclear ribonucleoprotein U	yes	yes	4;5	7.3958e-34	136.44	1607000000	0	0	891240000	715810000	0	0	426780000	353970000
EVLDIAAGMIK	11	0	1158.63	Q8BP48	Q8BP48	148	158	Metap1	Methionine aminopeptidase 1	yes	yes	2	0.0059166	68.371	59199000	26699000	32500000	0	0	26699000	30360000	0	0
EVLHGNQR	8	0	951.489	A0A3B2WDD2;A0A3B2WBL1;Q5XJF6;A0A3B2W824;P53026;A0A3B2W820;A0A3B2WCA5;D6RE43	A0A3B2WDD2	16	23	Rpl10a	Ribosomal protein;60S ribosomal protein L10a	yes	no	2;3	0.012163	77.674	66981000	0	66981000	0	0	0	62571000	0	0
EVQDGIAPR	9	0	983.504	Q3U4W8;P56399	Q3U4W8	407	415	Usp5	Ubiquitin carboxyl-terminal hydrolase;Ubiquitin carboxyl-terminal hydrolase 5	yes	no	2	0.023528	72.485	30744000	0	0	30744000	0	0	0	14722000	0
EVSSKEEQSPVKAEVAEK	18	2	1973	P14873	P14873	606	623	Map1b	Microtubule-associated protein 1B;MAP1B heavy chain;MAP1 light chain LC1	yes	yes	3	0.00013371	62.203	205770000	0	11710000	98056000	96002000	0	10939000	46955000	47473000
EVTEPLNLNPAK	12	0	1323.7	A0A0R4J0B4;Q99KK2	A0A0R4J0B4	187	198	Cmas	N-acylneuraminate cytidylyltransferase	yes	no	2	0.0016749	76.064	177860000	90563000	87296000	0	0	90563000	81549000	0	0
EVTHNIHYETYR	12	0	1560.73	A0A5F8MPL6;A0A571BE69;Q9Z1S5;A0A2R8W6V9;A0A2R8VHR7	A0A5F8MPL6	782	793	Sept3	Neuronal-specific septin-3	yes	no	4	0.00071944	62.924	18827000	0	18827000	0	0	0	17587000	0	0
EVTPEGLQMVK	11	0	1229.63	Q9DCL9	Q9DCL9	236	246	Paics	Multifunctional protein ADE2;Phosphoribosylaminoimidazole-succinocarboxamide synthase;Phosphoribosylaminoimidazole carboxylase	yes	yes	2	0.011489	57.598	67046000	0	67046000	0	0	0	62631000	0	0
EVTPVELPNCNLVK	14	0	1610.83	H3BK03;P52430;H3BLB8	H3BK03	33	46	Pon1	Serum paraoxonase/arylesterase 1	yes	no	2	0.0010624	93.667	1099700000	509840000	589910000	0	0	509840000	551070000	0	0
EVVAEEMAHR	10	0	1169.55	E9PUK3;A0A5F8MPQ8;E9PUI5;Q8K012	E9PUK3	87	96	Fnbp1l	Formin-binding protein 1-like	yes	no	2;3	0.0020274	81.338	40454000	17001000	23453000	0	0	17001000	21909000	0	0
EVVAGSHELGQDYEHVTMLQER	22	0	2526.18	Q62261;A0A0A0MQG2	Q62261	1718	1739	Sptbn1	Spectrin beta chain, non-erythrocytic 1	yes	no	3	0.00048399	41.912	28366000	28366000	0	0	0	28366000	0	0	0
EVVETPLLHPER	12	0	1417.76	Q8BVQ9;P46471	Q8BVQ9	231	242	Psmc2	26S protease regulatory subunit 7	yes	no	3	0.0029851	54.7	9612500	4258000	5354500	0	0	4258000	5002000	0	0
EVVPPSIIMSSQK	13	0	1413.75	Q9Z1P6	Q9Z1P6	62	74	Ndufa7	NADH dehydrogenase [ubiquinone] 1 alpha subcomplex subunit 7	yes	yes	2	0.0051912	53.683	45361000	0	45361000	0	0	0	42374000	0	0
EVVQNFAK	8	0	933.492	Q9CQI6	Q9CQI6	103	110	Cotl1	Coactosin-like protein	yes	yes	2	0.029036	74.191	26757000	0	26757000	0	0	0	24996000	0	0
EVVSAIIESGK	11	0	1130.62	F6RJV6;Q9JJK2	F6RJV6	217	227	Lancl2	LanC-like protein 2	yes	no	2	0.0095688	59.426	26224000	0	0	14488000	11736000	0	0	6937700	5803200
EVYELLDTPGR	11	0	1290.65	Q9DCL9;D3Z6P1;D6RCU8	Q9DCL9	20	30	Paics	Multifunctional protein ADE2;Phosphoribosylaminoimidazole-succinocarboxamide synthase;Phosphoribosylaminoimidazole carboxylase	yes	no	2	0.002402	79.148	48442000	24252000	24190000	0	0	24252000	22597000	0	0
EVYMGNVIQGGEGQAPTR	18	0	1904.91	Q8QZT1	Q8QZT1	85	102	Acat1	Acetyl-CoA acetyltransferase, mitochondrial	yes	yes	2	0.00012816	78.324	348060000	72713000	96262000	81692000	97393000	72713000	89924000	39119000	48161000
EVYQQQQYGSGGR	13	0	1498.68	Q80XR6;Q20BD0;Q99020	Q80XR6	238	250	Hnrnpab	Heterogeneous nuclear ribonucleoprotein A/B	yes	no	2	2.8928e-05	117.52	380500000	72448000	101260000	0	206790000	72448000	94592000	0	102260000
EWIECAHGIGGTR	13	0	1484.68	Q99LY9;B1ARW4	Q99LY9	39	51	Ndufs5	NADH dehydrogenase [ubiquinone] iron-sulfur protein 5;NADH dehydrogenase [ubiquinone] iron-sulfur protein 5, N-terminally processed	yes	no	2;3	9.8898e-05	68.83	43616000	9951400	9548100	0	24116000	9951400	8919500	0	11925000
EWTDGLFTHVLR	12	0	1472.74	Q9JHU4	Q9JHU4	2272	2283	Dync1h1	Cytoplasmic dynein 1 heavy chain 1	yes	yes	3	0.0061156	41.052	16539000	7674000	8864600	0	0	7674000	8281000	0	0
EWYQETHEK	9	0	1248.54	P14873	P14873	2427	2435	Map1b	Microtubule-associated protein 1B;MAP1B heavy chain;MAP1 light chain LC1	yes	yes	2;3	0.0072111	99.136	216560000	20214000	0	97551000	98793000	20214000	0	46713000	48853000
EYDDNGEGITIFRPLHLANK	20	1	2301.14	P27773	P27773	195	214	Pdia3	Protein disulfide-isomerase A3	yes	yes	4	0.010067	30.489	26545000	0	26545000	0	0	0	24798000	0	0
EYFGGFGEVESIELPMDNK	19	0	2159.97	Q60668;F6ZV59;G5E8G0;G3X9W0;F6SHF3	Q60668	200	218	Hnrnpd	Heterogeneous nuclear ribonucleoprotein D0	yes	no	2	5.8021e-05	64.65	153510000	0	0	79050000	74456000	0	0	37854000	36819000
EYFGQFGEIEAIELPIDPK	19	0	2194.08	Q80XR6;Q20BD0;Q99020	Q80XR6	177	195	Hnrnpab	Heterogeneous nuclear ribonucleoprotein A/B	yes	no	2	0.0052729	51.875	88270000	0	0	88270000	0	0	0	42269000	0
EYFPMQVVTR	10	0	1268.62	A0A0R4IZY0;Q8C1A5	A0A0R4IZY0	358	367	Thop1	Thimet oligopeptidase	yes	no	2	0.040821	50.04	15754000	15754000	0	0	0	15754000	0	0	0
EYGGLDVLVNNAGIAFK	17	0	1778.92	P48758;A0A338P684	P48758	80	96	Cbr1	Carbonyl reductase [NADPH] 1	yes	no	2	0.00056701	57.836	63422000	0	0	29281000	34141000	0	0	14021000	16883000
EYGPYETYEGSPVSK	15	0	1704.75	P07742	P07742	549	563	Rrm1	Ribonucleoside-diphosphate reductase large subunit	yes	yes	2	0.015275	39.917	10437000	10437000	0	0	0	10437000	0	0	0
EYLGAICSCTCFGGQR	16	0	1877.79	B9EHT6;A0A087WSN6;Q3UHL6;A0A087WR50;P11276;B7ZNJ1;A0A087WS56	B9EHT6	2195	2210	Fn1	Fibronectin;Anastellin	yes	no	2	0.023351	33.875	123310000	55025000	68284000	0	0	55025000	63788000	0	0
EYLTSHLEIR	10	0	1259.65	A2AS98;P28660	A2AS98	712	721	Nckap1	Nck-associated protein 1	yes	no	2	0.027223	56.563	9016900	9016900	0	0	0	9016900	0	0	0
EYQDLLNVK	9	0	1120.58	P20152;A0A0A6YWC8;P31001;D3YZ35;A0A0R4J036;P08551;P08553;P46660	P20152	382	390	Vim;Des;Nefm;Nefl;Ina	Vimentin;Desmin;Neurofilament light polypeptide;Neurofilament medium polypeptide;Alpha-internexin	no	no	2	0.010409	94.302	177820000	72949000	63748000	41125000	0	72949000	59551000	19693000	0
EYQLNDSAK	9	0	1066.49	P18872;D3Z2M7;F7BLT7	P18872	146	154	Gnao1	Guanine nucleotide-binding protein G(o) subunit alpha	yes	no	2	0.028343	69.598	8277800	0	8277800	0	0	0	7732800	0	0
EYQTQLIQR	9	0	1177.61	Q9JHU4	Q9JHU4	601	609	Dync1h1	Cytoplasmic dynein 1 heavy chain 1	yes	yes	2	0.013503	82.671	22113000	0	0	22113000	0	0	0	10589000	0
EYSLQVLR	8	0	1006.54	Q9CZN7	Q9CZN7	349	356	Shmt2	Serine hydroxymethyltransferase	yes	yes	2	0.029656	70.268	0	0	0	0	0	0	0	0	0
EYSSELNAPSQESDSHPR	18	0	2031.88	S4R2B0;B2RY56	S4R2B0	216	233	Rbm25	RNA-binding protein 25	yes	no	3	0.011357	31.801	46618000	0	0	25424000	21193000	0	0	12175000	10480000
EYTINIHKR	9	1	1172.63	P62900;A0A0A6YX26;A0A0A6YXL3	P62900	24	32	Rpl31	60S ribosomal protein L31	yes	no	3	0.03052	38.086	35305000	0	0	35305000	0	0	0	16906000	0
EYWMDSEGEMKPGR	14	1	1713.71	P11031	P11031	87	100	Sub1	Activated RNA polymerase II transcriptional coactivator p15	yes	yes	3	0.0010539	84.468	372380000	0	0	193270000	179110000	0	0	92550000	88570000
EYWMDSEGEMKPGRK	15	2	1841.81	P11031	P11031	87	101	Sub1	Activated RNA polymerase II transcriptional coactivator p15	yes	yes	2;3	0.00086054	67.93	217950000	0	0	105110000	112840000	0	0	50334000	55798000
FAAATGATPIAGR	13	0	1202.64	P14206;A0A1L1SRW0	P14206	90	102	Rpsa	40S ribosomal protein SA	yes	no	2	5.7899e-05	112.75	1215600000	184940000	158370000	448280000	424050000	184940000	147940000	214660000	209690000
FAAPAQPEEER	11	0	1243.58	A0A668KLC6;P20357	A0A668KLC6	1478	1488	Map2	Microtubule-associated protein 2	yes	no	2	0.0049166	64.711	28566000	0	28566000	0	0	0	26685000	0	0
FACAVVCIQK	10	0	1194.59	P61222	P61222	225	234	Abce1	ATP-binding cassette sub-family E member 1	yes	yes	2	0.036212	67.981	9887000	0	0	0	9887000	0	0	0	4889100
FACHSASLTVR	11	0	1247.61	Q99K48	Q99K48	145	155	Nono	Non-POU domain-containing octamer-binding protein	yes	yes	2;3	0.00071402	81.338	345080000	61564000	78123000	109140000	96245000	61564000	72980000	52265000	47593000
FADGDVDAVLSR	12	0	1263.61	Q8R0Y6	Q8R0Y6	815	826	Aldh1l1	Cytosolic 10-formyltetrahydrofolate dehydrogenase	yes	yes	2	0.021951	45.137	38645000	18701000	19944000	0	0	18701000	18631000	0	0
FADLSEAANR	10	0	1092.52	P20152;A0A0A6YWC8	P20152	295	304	Vim	Vimentin	yes	no	2	0.0013675	114.64	97763000	46922000	50842000	0	0	46922000	47494000	0	0
FAEAFEAIPR	10	0	1149.58	P42932;H3BL49;H3BJB6	P42932	441	450	Cct8	T-complex protein 1 subunit theta	yes	no	2	2.5875e-05	124.23	150860000	73048000	77813000	0	0	73048000	72690000	0	0
FAEALGSTEAK	11	0	1122.56	G3UYD0;Q3UHU8;Q9ESZ8;G3UYJ6	G3UYD0	393	403	Gtf2i	General transcription factor II-I	yes	no	2	0.001002	93.667	214150000	24534000	23460000	166150000	0	24534000	21915000	79564000	0
FAEDMGIPQVPVEK	14	0	1558.77	Q8C0M9	Q8C0M9	142	155	Asrgl1	Isoaspartyl peptidase/L-asparaginase;Isoaspartyl peptidase/L-asparaginase alpha chain;Isoaspartyl peptidase/L-asparaginase beta chain	yes	yes	2	0.003784	55.353	58101000	0	58101000	0	0	0	54276000	0	0
FAEFQYLQPGPPR	13	0	1548.77	Q8VDP4	Q8VDP4	405	417	Ccar2	Cell cycle and apoptosis regulator protein 2	yes	yes	2	0.006666	45.161	0	0	0	0	0	0	0	0	0
FAEWCLDYGAHGCR	14	0	1740.71	F6RJV6;Q9JJK2	F6RJV6	387	400	Lancl2	LanC-like protein 2	yes	no	3	0.0010842	48.14	55396000	25412000	29984000	0	0	25412000	28010000	0	0
FAEWCLDYGEHGCR	14	0	1798.72	O89112	O89112	351	364	Lancl1	LanC-like protein 1	yes	yes	2;3	0.00053906	80.763	598510000	295180000	303330000	0	0	295180000	283360000	0	0
FAFQAEVNR	9	0	1080.54	P08113	P08113	76	84	Hsp90b1	Endoplasmin	yes	yes	2	3.2757e-14	183.24	199640000	0	0	108240000	91404000	0	0	51830000	45199000
FAGVDIR	7	0	776.418	P14131	P14131	63	69	Rps16	40S ribosomal protein S16	yes	yes	2	0.0041841	143.97	327940000	0	104290000	122030000	101620000	0	97425000	58436000	50250000
FAHIDGDHLTLLNVYHAFK	19	0	2210.13	O35286;Q497W9	O35286	617	635	Dhx15	Pre-mRNA-splicing factor ATP-dependent RNA helicase DHX15	yes	no	3;4;5	6.6128e-09	67.685	207270000	0	0	112590000	94680000	0	0	53913000	46819000
FAHTNIESLVK	11	0	1257.67	P27773	P27773	184	194	Pdia3	Protein disulfide-isomerase A3	yes	yes	3	0.0055136	53.432	184360000	91492000	0	47163000	45709000	91492000	0	22584000	22603000
FAILTDPNSNDGLVTVVKPIDFETNR	26	1	2874.48	D3YYT0;P15116	D3YYT0	374	399	Cdh2	Cadherin-2	yes	no	3	0.0022481	24.831	63054000	0	0	36624000	26430000	0	0	17538000	13069000
FAISELFAK	9	0	1024.56	P09405	P09405	327	335	Ncl	Nucleolin	yes	yes	2	0.00010806	130.27	84560000	0	0	38815000	45745000	0	0	18587000	22621000
FAMEPEEFDSDTLR	14	0	1685.72	A0A0R4J0Z1;P08003	A0A0R4J0Z1	482	495	Pdia4	Protein disulfide-isomerase A4	yes	no	2	0.0023028	60.434	26457000	0	0	0	26457000	0	0	0	13083000
FANLNEQAAR	10	0	1132.56	P46660	P46660	291	300	Ina	Alpha-internexin	yes	yes	2	0.016567	66.692	17068000	0	17068000	0	0	0	15944000	0	0
FAQALGLTEAVK	12	0	1246.69	G3UYD0;Q3UHU8;Q9ESZ8	G3UYD0	498	509	Gtf2i	General transcription factor II-I	yes	no	2	0.0021198	84.17	1118000000	82240000	94331000	493550000	447890000	82240000	88120000	236340000	221480000
FAQHGTFEYEYSQR	14	0	1761.77	Q8VIJ6	Q8VIJ6	472	485	Sfpq	Splicing factor, proline- and glutamine-rich	yes	yes	3	0.00019556	84.297	320530000	163540000	156980000	0	0	163540000	146650000	0	0
FAQPGSFEYEYAMR	14	0	1694.74	Q99K48	Q99K48	259	272	Nono	Non-POU domain-containing octamer-binding protein	yes	yes	2	0.00019313	83.31	910260000	243670000	215240000	212870000	238480000	243670000	201070000	101930000	117930000
FAQPGTFEFEYASR	14	0	1648.75	Q8R326	Q8R326	264	277	Pspc1	Paraspeckle component 1	yes	yes	2	0.0015248	77.305	451970000	0	0	256050000	195920000	0	0	122610000	96883000
FASEITPITISVK	13	0	1404.79	Q8QZT1	Q8QZT1	228	240	Acat1	Acetyl-CoA acetyltransferase, mitochondrial	yes	yes	2	0.00031285	84.658	704680000	38034000	37492000	349450000	279700000	38034000	35023000	167330000	138310000
FASFPDYLVIQIK	13	0	1539.83	Q3U4W8;P56399	Q3U4W8	562	574	Usp5	Ubiquitin carboxyl-terminal hydrolase;Ubiquitin carboxyl-terminal hydrolase 5	yes	no	2	0.00045323	94.692	133040000	0	0	70476000	62563000	0	0	33748000	30938000
FATEAAITILR	11	0	1204.68	P11983	P11983	516	526	Tcp1	T-complex protein 1 subunit alpha	yes	yes	2	0.022488	50.108	258070000	0	0	258070000	0	0	0	123580000	0
FATEYCNTIEGTAK	14	0	1603.72	E9PUD2;Q8K1M6;A0A2U3TZ67	E9PUD2	353	366	Dnm1l	Dynamin-1-like protein	yes	no	2	0.024058	49.5	20881000	0	20881000	0	0	0	19506000	0	0
FATHAAALSVR	11	0	1142.62	Q8VIJ6	Q8VIJ6	358	368	Sfpq	Splicing factor, proline- and glutamine-rich	yes	yes	2;3	0.0010182	84.817	525320000	85792000	304180000	0	135350000	85792000	284150000	0	66931000
FATLAELVQYYMEHHGQLK	19	0	2277.13	P35235	P35235	71	89	Ptpn11	Tyrosine-protein phosphatase non-receptor type 11	yes	yes	4	0.0019759	35.176	12771000	0	0	0	12771000	0	0	0	6315400
FAVGSGAR	8	0	763.398	Q9R0Q6;A0A0G2JF52;D3YVI5	Q9R0Q6	111	118	Arpc1a	Actin-related protein 2/3 complex subunit 1A	yes	no	2	0.020046	100.75	91788000	47451000	44337000	0	0	47451000	41418000	0	0
FAVLHGEAPR	10	0	1095.58	Q8JZQ9	Q8JZQ9	566	575	Eif3b	Eukaryotic translation initiation factor 3 subunit B	yes	yes	3	0.026809	41.704	44396000	0	14969000	19198000	10228000	0	13984000	9193300	5057900
FAVLYQPLAGNDQAK	15	0	1633.85	B2RXS8;A0A0J9YVD2;B9EKR1	B2RXS8	346	360	Ptprz1	Protein-tyrosine-phosphatase;Receptor-type tyrosine-protein phosphatase zeta	yes	no	2	0.0014599	66.56	225380000	0	0	103740000	121640000	0	0	49679000	60149000
FCANTCVDCR	10	0	1301.5	A2AEX8;A2AEX6;P97447;A2AEY1;A2AEY2;A2AEX7;A2AEY0;A2AEX9	A2AEX8	51	60	Fhl1	Four and a half LIM domains protein 1	yes	no	2	0.0023464	99.442	71390000	34573000	36818000	0	0	34573000	34394000	0	0
FCENTQAGEGR	11	0	1267.53	F8WHM5;Q61543	F8WHM5	308	318	Glg1	Golgi apparatus protein 1	yes	no	2	0.0047227	65.305	38769000	9768800	14375000	14625000	0	9768800	13428000	7003300	0
FCIWTESAFR	10	0	1315.6	Q9D8E6	Q9D8E6	249	258	Rpl4	60S ribosomal protein L4	yes	yes	2	0.038516	53.775	67997000	0	0	0	67997000	0	0	0	33625000
FCTGLTQIETLFK	13	0	1556.79	Q04447	Q04447	253	265	Ckb	Creatine kinase B-type	yes	yes	2	0.00033976	110.39	1592600000	0	0	863480000	729150000	0	0	413480000	360570000
FDAGELITQR	10	0	1148.58	P67778;Q5SQG5	P67778	134	143	Phb	Prohibitin	yes	no	2	0.0052929	82.749	16639000	16639000	0	0	0	16639000	0	0	0
FDAMPFTLR	9	0	1096.54	P50580	P50580	273	281	Pa2g4	Proliferation-associated protein 2G4	yes	yes	2	0.02614	70.919	41500000	15727000	25774000	0	0	15727000	24077000	0	0
FDASFFGVHPK	11	0	1250.61	P19096;A0A0U1RNJ1	P19096	60	70	Fasn	Fatty acid synthase;[Acyl-carrier-protein] S-acetyltransferase;[Acyl-carrier-protein] S-malonyltransferase;3-oxoacyl-[acyl-carrier-protein] synthase;3-oxoacyl-[acyl-carrier-protein] reductase;3-hydroxyacyl-[acyl-carrier-protein] dehydratase;Enoyl-[acyl-carrier-protein] reductase;Oleoyl-[acyl-carrier-protein] hydrolase	yes	no	2;3	0.0039415	58.676	106790000	7854000	24112000	40678000	34145000	7854000	22524000	19479000	16885000
FDAVCLTCCSR	11	0	1387.57	Q9R1T2	Q9R1T2	130	140	Sae1	SUMO-activating enzyme subunit 1;SUMO-activating enzyme subunit 1, N-terminally processed	yes	yes	2	0.014632	54.608	24857000	0	24857000	0	0	0	23221000	0	0
FDDAVVQSDMK	11	0	1253.56	P63017;Q504P4;D3Z5E2	P63017	78	88	Hspa8	Heat shock cognate 71 kDa protein	yes	no	2	0.0018239	78.556	287770000	77305000	63306000	0	147160000	77305000	59138000	0	72768000
FDDPKFEVIDKPQS	14	2	1663.81	P97450	P97450	95	108	Atp5j	ATP synthase-coupling factor 6, mitochondrial	yes	yes	3	0.0019806	97.417	43119000	17283000	25836000	0	0	17283000	24135000	0	0
FDDPLLGPR	9	0	1028.53	Q8BMJ2	Q8BMJ2	1120	1128	Lars	Leucine--tRNA ligase, cytoplasmic	yes	yes	2	0.040572	54.776	0	0	0	0	0	0	0	0	0
FDGALNVDLTEFQTNLVPYPR	21	0	2408.2	P05213;A0A0A0MQA5;P68368;A0A2R8VHF3;P68369;P05214	P68369	244	264	Tuba1b;Tuba4a;Tuba1a;Tuba3a	Tubulin alpha-1B chain;Tubulin alpha-4A chain;Tubulin alpha-1A chain;Tubulin alpha-3 chain	no	no	2	2.5733e-07	125.53	1705300000	0	0	846300000	859050000	0	0	405260000	424800000
FDLGQDVIDFTGHSLALYR	19	0	2166.07	Q61598;A0A1Y7VL99	Q61598	175	193	Gdi2	Rab GDP dissociation inhibitor beta	yes	no	3	3.0702e-14	127.78	89107000	0	0	37153000	51954000	0	0	17791000	25691000
FDLMYAK	7	0	886.426	P05213;A0A0A0MQA5;P68368;P68369;P05214;Q3UX10	P68369	395	401	Tuba1b;Tuba4a;Tuba1a;Tuba3a;Tubal3	Tubulin alpha-1B chain;Tubulin alpha-4A chain;Tubulin alpha-1A chain;Tubulin alpha-3 chain;Tubulin alpha chain-like 3	no	no	2	0.027584	80.294	118810000	0	48132000	70683000	0	0	44963000	33847000	0
FDLSNNHPLGMAIFLK	16	0	1815.93	P19096;A0A0U1RNJ1	P19096	1765	1780	Fasn	Fatty acid synthase;[Acyl-carrier-protein] S-acetyltransferase;[Acyl-carrier-protein] S-malonyltransferase;3-oxoacyl-[acyl-carrier-protein] synthase;3-oxoacyl-[acyl-carrier-protein] reductase;3-hydroxyacyl-[acyl-carrier-protein] dehydratase;Enoyl-[acyl-carrier-protein] reductase;Oleoyl-[acyl-carrier-protein] hydrolase	yes	no	3	0.011322	30.133	0	0	0	0	0	0	0	0	0
FDTGNLCMVTGGANLGR	17	0	1781.82	P62702;V9GWY0	P62702	175	191	Rps4x;Gm15013	40S ribosomal protein S4, X isoform;40S ribosomal protein S4	yes	no	2;3	2.4537e-17	101.42	1707500000	32837000	40263000	138150000	1496300000	32837000	37612000	66155000	739900000
FEAAETLEEAAMR	13	0	1466.67	Q5UE59;E9Q7C9;Q7TNF4;Q8CD76;A0A5F8MPZ2;O88447;F6UYN4	Q5UE59	480	492	Klc1	Kinesin light chain 1	yes	no	2	7.8106e-05	72.006	57534000	0	35028000	22506000	0	0	32722000	10777000	0
FEAHPNDLYVEGLPENIPFR	20	0	2356.15	G3UYD0;Q3UHU8;Q9ESZ8;G3UYJ6	G3UYD0	410	429	Gtf2i	General transcription factor II-I	yes	no	3	3.9697e-06	57.496	139320000	0	0	71465000	67859000	0	0	34222000	33556000
FEAPLFNAR	9	0	1063.55	Q91VD9	Q91VD9	409	417	Ndufs1	NADH-ubiquinone oxidoreductase 75 kDa subunit, mitochondrial	yes	yes	2	0.014326	81.784	18482000	8096900	0	0	10385000	8096900	0	0	5135400
FEDENFILK	9	0	1153.57	P17742;A0A1L1SST0	P17742	83	91	Ppia	Peptidyl-prolyl cis-trans isomerase A;Peptidyl-prolyl cis-trans isomerase A, N-terminally processed	yes	no	2	0.0042322	114.28	2224000000	932230000	1291800000	0	0	932230000	1206700000	0	0
FEDGDLTLYQSNAILR	16	0	1853.92	P19157;A0A494B908;A0A494BAW2;P46425;A0A494BAS3;A0A494BAU3;A0A494BAM8	P19157	56	71	Gstp1;Gstp2	Glutathione S-transferase P 1;Glutathione S-transferase P 2	yes	no	2;3	0.00080709	98.156	68908000	0	12317000	33981000	22610000	0	11506000	16272000	11181000
FEDYLNAESR	10	0	1242.55	E9Q9F5;E9Q1G8;O55131	E9Q9F5	138	147	Sept7	Septin-7	yes	no	2	0.0068615	89.247	137510000	67546000	69960000	0	0	67546000	65354000	0	0
FEEFLQR	7	0	967.476	Z4YJV4;Q60597	Z4YJV4	260	266	Ogdh	2-oxoglutarate dehydrogenase, mitochondrial	yes	no	2	0.041278	103.29	0	0	0	0	0	0	0	0	0
FEELNADLFR	10	0	1252.61	P63017;Q504P4;P17156	P63017	302	311	Hspa8;Hspa2	Heat shock cognate 71 kDa protein;Heat shock-related 70 kDa protein 2	yes	no	2	0.0015012	105.78	451520000	0	215970000	0	235550000	0	201750000	0	116480000
FEIVYNLLSLR	11	0	1365.77	Q9DCT2	Q9DCT2	125	135	Ndufs3	NADH dehydrogenase [ubiquinone] iron-sulfur protein 3, mitochondrial	yes	yes	2	0.0055156	63.283	15515000	0	0	7786600	7728600	0	0	3728700	3821800
FEIWDTAGQER	11	0	1350.62	Q8C266;P35278;P61021;A2A5F5	Q8C266	72	82	Rab5c;Rab5b	Ras-related protein Rab-5C;Ras-related protein Rab-5B	no	no	2	0.0020714	74.162	150440000	75561000	74877000	0	0	75561000	69947000	0	0
FEKPLEEK	8	1	1018.53	Q9CY58;Q3UMP4;A0A0N4SV32;A0A0N4SWH2;A0A0N4SUQ1;A0A0N4SUN8;A0A0N4SV40;A0A0N4SVK5	Q9CY58	138	145	Serbp1	Plasminogen activator inhibitor 1 RNA-binding protein	yes	no	2	0.012289	121.99	6852700	6852700	0	0	0	6852700	0	0	0
FELTGIPPAPR	11	0	1196.66	P63017;Q504P4	P63017	459	469	Hspa8	Heat shock cognate 71 kDa protein	yes	no	2	0.0011665	90.657	21331000	0	21331000	0	0	0	19927000	0	0
FENAFLSHVISQHQSLLGNIR	21	0	2409.26	Q03265;D3Z6F5	Q03265	507	527	Atp5a1	ATP synthase subunit alpha, mitochondrial;ATP synthase subunit alpha	yes	no	3;4	1.7399e-10	111.95	512260000	0	0	289690000	222580000	0	0	138720000	110060000
FESDPATHNEPGVR	14	0	1554.71	A0A0J9YTY0;A0A0J9YUL3;Q8C1B7;A0A0J9YUV6;A0A0J9YVA6	A0A0J9YTY0	66	79	Sept11	Septin-11	yes	no	2;3	1.7295e-09	108.17	128970000	9991800	0	60038000	58941000	9991800	0	28750000	29146000
FESPEVAER	9	0	1062.5	Q9D0E1	Q9D0E1	698	706	Hnrnpm	Heterogeneous nuclear ribonucleoprotein M	yes	yes	2	0.012171	88.37	9161100	9161100	0	0	0	9161100	0	0	0
FESWGACDGSTGTK	14	0	1501.61	P12025	P12025	85	98	Mdk	Midkine	yes	yes	2	0.00096324	78.096	86641000	0	0	48350000	38292000	0	0	23153000	18935000
FFEHFIEGGR	10	0	1237.59	D3YWF6;Q7TQI3	D3YWF6	159	168	Otub1	Ubiquitin thioesterase OTUB1	yes	no	2;3	0.009076	75.378	203740000	93542000	110200000	0	0	93542000	102950000	0	0
FFEVILIDPFHK	12	0	1503.81	Q9CZM2	Q9CZM2	129	140	Rpl15	60S ribosomal protein L15	yes	yes	2;3	0.0005574	64.55	61971000	0	0	18957000	43013000	0	0	9077900	21270000
FFLCQVAGDAK	11	0	1254.61	P13595;E9Q589;A0A0A6YWU2;A0A0A6YY47;E9QB01	P13595	38	48	Ncam1	Neural cell adhesion molecule 1	no	no	2	0.0011022	91.867	1291300000	275480000	0	475930000	539850000	275480000	0	227900000	266950000
FFQPTEMASQDFFQR	15	0	1877.84	P17427	P17427	825	839	Ap2a2	AP-2 complex subunit alpha-2	yes	yes	2	0.024511	35.414	14739000	0	14739000	0	0	0	13769000	0	0
FGANAILGVSLAVCK	15	0	1518.82	P17182;Q6PHC1;B0QZL1;D3Z2S4;A0A0N4SUX5;P17183;P21550;Q5SX59	P17182	106	120	Eno1;Eno2;Eno3	Alpha-enolase;Enolase;Gamma-enolase;Beta-enolase	yes	no	2	0.00017431	82.417	144770000	144770000	0	0	0	144770000	0	0	0
FGAPPHAGGGIGLER	15	0	1434.74	Q922B2	Q922B2	461	475	Dars	Aspartate--tRNA ligase, cytoplasmic	yes	yes	3	0.00098532	45.33	42791000	10353000	13420000	19018000	0	10353000	12537000	9106900	0
FGDMQEIIQNFVR	13	0	1595.78	A0A2I3BS20;A0A2I3BQM5;A0A2I3BPL1;A0A2I3BQR5;A0A2I3BPW0;Q9QYG0	A0A2I3BS20	71	83	Ndrg2	Protein NDRG2	yes	no	2	0.001669	74.684	23785000	0	0	10173000	13612000	0	0	4871500	6731200
FGEAIGMGFPVK	12	0	1251.63	G3UYD0;Q3UHU8;Q9ESZ8;G3UX27	G3UYD0	795	806	Gtf2i	General transcription factor II-I	yes	no	2	0.0078524	58.676	73846000	0	0	34705000	39141000	0	0	16619000	19355000
FGEVVDCTLK	10	0	1166.56	Q60668;F6ZV59;G5E8G0;G3X9W0;E9Q5B6	Q60668	120	129	Hnrnpd	Heterogeneous nuclear ribonucleoprotein D0	yes	no	2	0.0015882	107.15	1717300000	385370000	378570000	478370000	475000000	385370000	353650000	229070000	234890000
FGFGFGGTGK	10	0	973.466	Q91VR5;A0A1Y7VM48	Q91VR5	163	172	Ddx1	ATP-dependent RNA helicase DDX1	yes	no	2	0.012022	62.463	0	0	0	0	0	0	0	0	0
FGFPEGSVELYAEK	14	0	1571.75	P62908;D3YV43;A0A140LI77	P62908	77	90	Rps3	40S ribosomal protein S3	yes	no	2	0.0016389	73.848	231230000	0	0	0	231230000	0	0	0	114340000
FGFYEVFK	8	0	1035.51	G5E902;Q8VEM8	G5E902	134	141	Slc25a3	Phosphate carrier protein, mitochondrial	yes	no	2	0.039138	75.854	9332100	9332100	0	0	0	9332100	0	0	0
FGGALDAAAK	10	0	919.476	Q3V117;Q91V92	Q3V117	935	944	Acly	ATP-citrate synthase	yes	no	1;2	0.0098479	66.351	41520000	17679000	0	0	23841000	17679000	0	0	11789000
FGGNPGGFGNQGGFGNSR	18	0	1725.76	Q921F2;A0A087WR97	Q921F2	276	293	Tardbp	TAR DNA-binding protein 43	yes	no	2	4.6091e-05	88.021	384220000	78839000	79318000	107020000	119030000	78839000	74096000	51250000	58863000
FGGPVHHQAQR	11	0	1232.62	P70372	P70372	207	217	Elavl1	ELAV-like protein 1	yes	yes	3;4	0.00041094	78.655	40694000	0	18580000	0	22115000	0	17356000	0	10936000
FGGSGSQVDSAR	12	0	1166.53	Q8VDM4	Q8VDM4	358	369	Psmd2	26S proteasome non-ATPase regulatory subunit 2	yes	yes	2	0.00066944	97.456	71475000	20615000	18141000	32719000	0	20615000	16946000	15668000	0
FGIEAFSDCLR	11	0	1313.61	Q80XN0;D3Z2Y8	Q80XN0	213	223	Bdh1	D-beta-hydroxybutyrate dehydrogenase, mitochondrial	yes	no	2	0.011489	57.598	94265000	40981000	53283000	0	0	40981000	49775000	0	0
FGISSVPTK	9	0	934.512	Q9D1J3;A0A1W2P7G2;A0A1W2P6N2	Q9D1J3	127	135	Sarnp	SAP domain-containing ribonucleoprotein	yes	no	2	0.033192	66.692	250810000	0	23706000	118980000	108120000	0	22145000	56975000	53467000
FGLCAYTSQGR	11	0	1258.58	G3UY93;Q9Z1Q9;G3UZX1	G3UY93	923	933	Vars	Valine--tRNA ligase	yes	no	2	0.036922	43.512	6610900	0	6610900	0	0	0	6175700	0	0
FGLNVSSISR	10	0	1078.58	Q9D1J3;A0A1W2P7G2	Q9D1J3	157	166	Sarnp	SAP domain-containing ribonucleoprotein	yes	no	2	0.0015388	113.66	35933000	0	0	35933000	0	0	0	17207000	0
FGNICVVR	8	0	963.496	Q921M3	Q921M3	1050	1057	Sf3b3	Splicing factor 3B subunit 3	yes	yes	2	0.011773	118.01	0	0	0	0	0	0	0	0	0
FGQAATMEGIGAIGGTPPAFNRPAPGAEFAPNKR	34	2	3397.7	Q99K48	Q99K48	437	470	Nono	Non-POU domain-containing octamer-binding protein	yes	yes	4	1.1566e-24	67.283	505390000	0	0	240450000	264940000	0	0	115140000	131010000
FGQGGAGPVGGQGPR	15	0	1340.66	Q8VIJ6	Q8VIJ6	659	673	Sfpq	Splicing factor, proline- and glutamine-rich	yes	yes	2	0.00022984	84.17	1010600000	252180000	0	385920000	372450000	252180000	0	184800000	184180000
FGQQNPR	7	0	845.414	Q3TIV5	Q3TIV5	52	58	Zc3h15	Zinc finger CCCH domain-containing protein 15	yes	yes	2	0.023949	121.87	92223000	0	0	92223000	0	0	0	44162000	0
FGSGMNMGR	9	0	955.4	Q9D0E1;B8JK33;B8JK32;F6W322;F7C9U3	Q9D0E1	362	370	Hnrnpm	Heterogeneous nuclear ribonucleoprotein M	yes	no	2	0.029011	69.198	14365000	0	14365000	0	0	0	13420000	0	0
FGVQTDR	7	0	821.403	Q921L6;Q60598	Q921L6	236	242	Cttn	Src substrate cortactin	yes	no	2	0.020837	124.89	77362000	40845000	36517000	0	0	40845000	34113000	0	0
FGYHIIMVEGR	11	0	1320.66	Q9CWW6	Q9CWW6	120	130	Pin4	Peptidyl-prolyl cis-trans isomerase NIMA-interacting 4	yes	yes	2;3	0.0013672	68.016	69468000	9822100	8494800	51151000	0	9822100	7935600	24494000	0
FGYVDFESAEDLEK	14	0	1647.73	P09405	P09405	351	364	Ncl	Nucleolin	yes	yes	2	2.9867e-05	113.47	363130000	0	0	189010000	174120000	0	0	90510000	86100000
FHDFDHR	7	0	972.42	S4R1M2;D3YXK2;Q80YR5;F6XJ79;F6Z0Y5	S4R1M2	768	774	Safb;Safb2	Scaffold attachment factor B1;Scaffold attachment factor B2	yes	no	3	0.011306	104.45	115170000	0	34888000	41813000	38467000	0	32591000	20023000	19022000
FHFVDLAGSER	11	0	1276.62	F8VQE2;E9Q0A4;Q9QXL1;E9QMU1;J3QNW9;F8WGN6;E9Q0J5;B7ZNG0;Q7M6Z4;Q9QXL2	F8VQE2	270	280	Kif21b;Kif7;Kif21a;Kif27	Kinesin-like protein;Kinesin-like protein KIF21B;Kinesin-like protein KIF7;Kinesin-like protein KIF27;Kinesin-like protein KIF21A	yes	no	2	0.023819	49.418	10631000	10631000	0	0	0	10631000	0	0	0
FHHTIGGSR	9	0	1010.5	Q9CZM2	Q9CZM2	180	188	Rpl15	60S ribosomal protein L15	yes	yes	3	0.0076019	74.165	0	0	0	0	0	0	0	0	0
FHLDLTHPVEDGIFDSGNFEQFLR	24	0	2832.35	Q9D7S7	Q9D7S7	16	39	Rpl22l1	60S ribosomal protein L22-like 1	yes	yes	4	4.5627e-64	168.99	777180000	0	0	410720000	366460000	0	0	196680000	181220000
FHLGEAEMEER	11	0	1346.59	F6RJV6;Q9JJK2	F6RJV6	2	12	Lancl2	LanC-like protein 2	yes	no	3	0.01126	33.87	7380900	7380900	0	0	0	7380900	0	0	0
FHPIQGHR	8	0	990.515	Q9CX86	Q9CX86	160	167	Hnrnpa0	Heterogeneous nuclear ribonucleoprotein A0	yes	yes	2;3	0.01181	88.591	221220000	109690000	111530000	0	0	109690000	104190000	0	0
FHQLDIDNPQSIR	13	0	1581.79	P48758;A0A338P684	P48758	59	71	Cbr1	Carbonyl reductase [NADPH] 1	yes	no	3	0.00040008	88.087	33480000	7907700	9411100	16161000	0	7907700	8791500	7738800	0
FHQQGAPR	8	0	939.467	P14733	P14733	572	579	Lmnb1	Lamin-B1	yes	yes	2;3	0.016729	103.29	74931000	32148000	42783000	0	0	32148000	39966000	0	0
FHTVSGSK	8	0	861.434	Q80XR6;Q20BD0;Q99020	Q80XR6	221	228	Hnrnpab	Heterogeneous nuclear ribonucleoprotein A/B	yes	no	2	0.026943	96.492	83289000	0	83289000	0	0	0	77806000	0	0
FHVDISLTQFIQEYSHLQPGDHLTDVTLK	29	0	3380.7	Q8R2P8;Q99MN1	Q8R2P8	126	154	Kars	Lysine--tRNA ligase	yes	no	4	0.022199	21.925	27691000	0	0	27691000	0	0	0	13260000	0
FHVEEEGKGK	10	1	1158.57	P09411;S4R2M7;P09041	P09411	124	133	Pgk1;Pgk2	Phosphoglycerate kinase 1;Phosphoglycerate kinase;Phosphoglycerate kinase 2	yes	no	2	0.042457	52.716	6664800	6664800	0	0	0	6664800	0	0	0
FIAGTGCLVR	10	0	1092.58	Q8CHP8	Q8CHP8	211	220	Pgp	Phosphoglycolate phosphatase	yes	yes	2	0.0032241	96.253	18925000	10394000	8531500	0	0	10394000	7969800	0	0
FILNLPTFSVR	11	0	1305.74	Q9R1P3	Q9R1P3	171	181	Psmb2	Proteasome subunit beta type-2	yes	yes	2	6.263e-12	136.57	240810000	0	0	128670000	112140000	0	0	61616000	55452000
FIPCSPFSDYVYK	13	0	1621.75	Q3TT92;E9PWE8;Q62188	Q3TT92	466	478	Dpysl3	Dihydropyrimidinase-related protein 3	yes	no	2	0.0036611	57.532	989830000	160910000	187100000	316250000	325560000	160910000	174790000	151440000	160990000
FIPCSPFSDYVYKR	14	1	1777.85	Q3TT92;E9PWE8;Q62188	Q3TT92	466	479	Dpysl3	Dihydropyrimidinase-related protein 3	yes	no	3	0.019602	39.219	12225000	12225000	0	0	0	12225000	0	0	0
FIQDSIFGLCPHMTEDNKDLIQGK	24	1	2805.35	P27773	P27773	235	258	Pdia3	Protein disulfide-isomerase A3	yes	yes	4	1.8588e-06	51.234	67956000	0	0	67956000	0	0	0	32541000	0
FIQPNIGELPTALK	14	0	1539.87	Z4YL78;A0A0R4J0K2;K3W4R5;A2AGT5	Z4YL78	893	906	Ckap5	Cytoskeleton-associated protein 5	yes	no	2	0.0082667	47.938	16218000	0	16218000	0	0	0	15150000	0	0
FISDKDASVVGFFR	14	1	1586.81	P27773	P27773	148	161	Pdia3	Protein disulfide-isomerase A3	yes	yes	2;3	0.00091595	78.763	80056000	17151000	62905000	0	0	17151000	58764000	0	0
FIVLSNNYLQIR	12	0	1478.82	P13595;A0A0A6YY91;E9Q589;A0A0A6YWU2;A0A0A6YY47;E9QB01	P13595	166	177	Ncam1	Neural cell adhesion molecule 1	no	no	2	0.00042493	108.98	119310000	0	0	64418000	54894000	0	0	30847000	27145000
FKAEHDQLLLNYAK	14	1	1688.89	P14733	P14733	111	124	Lmnb1	Lamin-B1	yes	yes	3	0.0056363	50.155	79473000	0	0	46730000	32743000	0	0	22377000	16191000
FKDIFQEIYDKK	12	2	1572.82	O88844	O88844	223	234	Idh1	Isocitrate dehydrogenase [NADP] cytoplasmic	yes	yes	3;4	0.00067436	77.527	127190000	16969000	17916000	50148000	42159000	16969000	16736000	24014000	20848000
FKDPGLVDQLVK	12	1	1357.76	Q8C483;P26638;A2AFS0;A2AFS1	Q8C483	27	38	Sars	Serine--tRNA ligase, cytoplasmic	yes	no	2	0.030374	43.958	57673000	0	0	0	57673000	0	0	0	28519000
FKDPNAPK	8	1	915.481	A0A0J9YUZ4;P63158;A0A0J9YUD8;D3YZ18	A0A0J9YUZ4	103	110	Hmgb1	High mobility group protein B1	yes	no	2	0.019164	108.46	336020000	0	0	152950000	183070000	0	0	73244000	90525000
FKDPNCVGTVLASRPHTLDGR	21	2	2339.18	Q3UGB5;Q9JII5;D3Z4J1	Q3UGB5	58	78	Dazap1	DAZ-associated protein 1	yes	no	3;4;5	2.9339e-08	99.059	736450000	29027000	34014000	315980000	357420000	29027000	31775000	151310000	176750000
FKGTETISK	9	1	1009.54	Q62446;A0A1Y7VP01	Q62446	72	80	Fkbp3	Peptidyl-prolyl cis-trans isomerase FKBP3	yes	no	2	0.0064118	108.98	30169000	13075000	17094000	0	0	13075000	15969000	0	0
FKLEAPDADELPR	13	1	1499.76	Q99KI0	Q99KI0	522	534	Aco2	Aconitate hydratase, mitochondrial	yes	yes	2;3	7.2008e-06	77.305	91856000	48745000	43110000	0	0	48745000	40272000	0	0
FKLPGQPPASMGR	13	1	1384.73	Q61598;A0A1Y7VL99	Q61598	56	68	Gdi2	Rab GDP dissociation inhibitor beta	yes	no	3	0.037438	26.232	17697000	17697000	0	0	0	17697000	0	0	0
FKPAYNPYTEPSMEVFSYHQGLK	23	1	2732.29	E9PWY9;Q8C0C7	E9PWY9	404	426	Farsa	Phenylalanine--tRNA ligase alpha subunit	yes	no	4	0.00085941	40.381	128550000	0	0	128550000	0	0	0	61558000	0
FLAAGTHLGGTNLDFQMEQYIYK	23	0	2616.27	P14206;A0A1L1SUK3	P14206	18	40	Rpsa	40S ribosomal protein SA	yes	no	3	2.0477e-05	47.392	280630000	0	0	128840000	151790000	0	0	61697000	75058000
FLASVSTVLTSK	12	0	1251.71	Q91VB8;P01942	Q91VB8	129	140	haemaglobin alpha 2;Hba	Hemoglobin subunit alpha	yes	no	1;2	0.00063913	94.297	1161100000	0	0	554270000	606860000	0	0	265420000	300090000
FLDGIYVSEK	10	0	1169.6	A0A0G2JES3;P51410;A0A140T8T4	A0A0G2JES3	174	183	Rpl9	60S ribosomal protein L9	yes	no	2	0.00013344	101.65	294680000	84093000	97899000	0	112690000	84093000	91454000	0	55724000
FLEPTLR	7	0	874.491	Q922B2	Q922B2	339	345	Dars	Aspartate--tRNA ligase, cytoplasmic	yes	yes	2	0.031681	111.28	21297000	0	21297000	0	0	0	19895000	0	0
FLEPVSVSETK	11	0	1234.64	B1AT60;B1AT59;Q400C8	B1AT60	126	136	Amz2	Archaemetzincin-2	yes	no	2	0.038314	43.308	72637000	35614000	37022000	0	0	35614000	34585000	0	0
FLESLPEEEQQR	12	0	1503.72	A2AWT6;A2AWT7;A2AWT5;P25976	A2AWT6	324	335	Ubtf	Nucleolar transcription factor 1	yes	no	2	0.0026669	65.347	63907000	0	28460000	35447000	0	0	26587000	16974000	0
FLFENQTPAHVYYR	14	0	1783.87	Q6NV83	Q6NV83	461	474	U2surp	U2 snRNP-associated SURP motif-containing protein	yes	yes	2;3	0.00042915	81.431	215630000	0	0	149420000	66205000	0	0	71551000	32738000
FLHGVIVAADSR	12	0	1283.7	O55234;Q8BTY5	O55234	67	78	Psmb5	Proteasome subunit beta type-5	yes	no	3	0.020127	37.327	39374000	0	0	39374000	0	0	0	18855000	0
FLIATGERPR	10	1	1158.65	Q9JMH6;A0A1W2P6U1	Q9JMH6	271	280	Txnrd1	Thioredoxin reductase 1, cytoplasmic	yes	no	2;3	0.0012474	88.496	18521000	18521000	0	0	0	18521000	0	0	0
FLIDGFPR	8	0	963.518	A0A0R4J093;Q9DBP5	A0A0R4J093	120	127	Cmpk1	UMP-CMP kinase	yes	no	2	0.038614	68.422	0	0	0	0	0	0	0	0	0
FLILPDMLK	9	0	1088.63	P62320	P62320	70	78	Snrpd3	Small nuclear ribonucleoprotein Sm D3	yes	yes	2	0.012744	85.212	74579000	0	0	37739000	36840000	0	0	18072000	18217000
FLIPNASQPESK	12	0	1329.69	P63101;A0A2I3BQ03	P63101	104	115	Ywhaz	14-3-3 protein zeta/delta	yes	no	2	0.0048542	60.434	1074400000	0	0	0	1074400000	0	0	0	531310000
FLKEEVNIAR	10	1	1217.68	A0A5F8MPL6;A0A571BE69;Q9Z1S5;A0A2R8W6V9;A0A2R8VHB2	A0A5F8MPL6	621	630	Sept3	Neuronal-specific septin-3	yes	no	3	1.0395e-05	98.048	27597000	0	27597000	0	0	0	25780000	0	0
FLLADNLYCK	10	0	1255.63	Q3TIR6;P61759	Q3TIR6	104	113	Vbp1	Prefoldin subunit 3	yes	no	2	0.0049884	84.476	134040000	35741000	46454000	51845000	0	35741000	43396000	24827000	0
FLLSLPEHR	9	0	1110.62	Q99JI4	Q99JI4	24	32	Psmd6	26S proteasome non-ATPase regulatory subunit 6	yes	yes	3	0.0044969	72.928	21932000	0	21932000	0	0	0	20488000	0	0
FLMSLVNQVPK	11	0	1274.71	Q9DCH4	Q9DCH4	311	321	Eif3f	Eukaryotic translation initiation factor 3 subunit F	yes	yes	2	0.035636	59.8	13811000	0	13811000	0	0	0	12902000	0	0
FLNVPMFR	8	0	1022.54	Q6P5F9	Q6P5F9	254	261	Xpo1	Exportin-1	yes	yes	2	0.035455	86.113	3740900	0	3740900	0	0	0	3494600	0	0
FLQASEDLLK	10	0	1162.62	Q5NC80;P15532;Q5NC79;E9PZF0	E9PZF0	40	49	Nme1;Gm20390	Nucleoside diphosphate kinase;Nucleoside diphosphate kinase A	no	no	2	0.0045442	88.948	85511000	38792000	46719000	0	0	38792000	43643000	0	0
FLQDHGSDSFLAEHK	15	0	1729.81	Q62446;A0A1Y7VLK0;A0A1Y7VP01;A0A1Y7VMJ9	Q62446	28	42	Fkbp3	Peptidyl-prolyl cis-trans isomerase FKBP3	yes	no	4	0.0049109	36.77	150940000	82914000	68023000	0	0	82914000	63545000	0	0
FLSHWDHITR	10	0	1310.65	Q8BH95	Q8BH95	116	125	Echs1	Enoyl-CoA hydratase, mitochondrial	yes	yes	3;4	0.0010781	82.261	189440000	49323000	72706000	32136000	35271000	49323000	67920000	15389000	17442000
FLSQIESDR	9	0	1093.54	G3UVV4;P17710;Q91W97	G3UVV4	785	793	Hk1;Hkdc1	Hexokinase;Hexokinase-1;Putative hexokinase HKDC1	yes	no	2	0.017524	78.334	7511000	0	7511000	0	0	0	7016500	0	0
FLSQPFQVAEVFTGHMGK	18	0	2022	P56480	P56480	463	480	Atp5b	ATP synthase subunit beta, mitochondrial	yes	yes	3	4.2682e-05	57.936	471390000	0	0	244580000	226810000	0	0	117120000	112160000
FLVPDHVNMSELIK	14	0	1640.86	Q9CQV6;M0QWC2	Q9CQV6	52	65	Map1lc3b	Microtubule-associated proteins 1A/1B light chain 3B	yes	no	2;3	0.00032752	81.625	285280000	14017000	16037000	84910000	170320000	14017000	14981000	40660000	84223000
FLVPDHVNMSELVK	14	0	1626.84	Q91VR7	Q91VR7	52	65	Map1lc3a	Microtubule-associated proteins 1A/1B light chain 3A	yes	yes	2;3	7.8958e-05	83.729	335080000	40902000	25594000	127650000	140940000	40902000	23909000	61126000	69693000
FLVVAHDDGR	10	0	1127.57	Q61553	Q61553	91	100	Fscn1	Fascin	yes	yes	2;3	0.0099295	56.729	194250000	74759000	69027000	28091000	22370000	74759000	64483000	13452000	11062000
FLYMWPNAR	9	0	1196.58	Q3ULD5;Q6PD20	Q3ULD5	461	469	Mccc2	Methylcrotonoyl-CoA carboxylase beta chain, mitochondrial	yes	no	2	0.027226	70.268	16798000	6646800	10151000	0	0	6646800	9482800	0	0
FMELLEPLSER	11	0	1362.69	Q62261;A0A0A0MQG2	Q62261	1467	1477	Sptbn1	Spectrin beta chain, non-erythrocytic 1	yes	no	2	0.0068166	57.598	0	0	0	0	0	0	0	0	0
FMEQVIFK	8	0	1040.54	Q99JY9;A0A087WRA1;A0A087WP86;A0A087WQ14;A0A087WS98;A0A087WQ83	Q99JY9	92	99	Actr3	Actin-related protein 3	yes	no	2	0.036575	83.265	57305000	0	0	30006000	27300000	0	0	14369000	13500000
FMLQDVLDLR	10	0	1248.65	A0A0J9YUS5;E9PVC6;E9Q9E1;E9PVC5;Q6NZJ6	A0A0J9YUS5	684	693	Eif4g1	Eukaryotic translation initiation factor 4 gamma 1	yes	no	2	0.0023464	99.442	18695000	0	0	18695000	0	0	0	8952400	0
FMQDASDVMQLLLK	14	0	1637.82	Q8BKC5	Q8BKC5	573	586	Ipo5	Importin-5	yes	yes	2	0.00039648	71.889	0	0	0	0	0	0	0	0	0
FMQQWLETR	9	0	1237.59	E9QJT5;P56376	E9QJT5	119	127	Acyp1	Acylphosphatase;Acylphosphatase-1	yes	no	2	0.0019039	119.27	47614000	22420000	25194000	0	0	22420000	23535000	0	0
FMQTFVLAPEGSVANK	16	0	1737.88	P97855	P97855	108	123	G3bp1	Ras GTPase-activating protein-binding protein 1	yes	yes	2	7.1517e-06	65.232	51648000	0	51648000	0	0	0	48248000	0	0
FNADEFEDMVAEKR	14	1	1699.75	I7HLV2;Q6ZWV3	I7HLV2	176	189	Rpl10	60S ribosomal protein L10	yes	no	2;3	0.0025942	65.395	92152000	29750000	29040000	33361000	0	29750000	27129000	15975000	0
FNASQLITQR	10	0	1176.63	O35129;F6QPR1;F6Q8V7	O35129	148	157	Phb2	Prohibitin-2	yes	no	2	0.0024639	94.692	61683000	0	0	25207000	36476000	0	0	12070000	18037000
FNFLNPNDPYHAYYR	15	0	1929.88	Q8K4Z5	Q8K4Z5	81	95	Sf3a1	Splicing factor 3A subunit 1	yes	yes	3	0.00051029	70.438	33677000	0	0	33677000	0	0	0	16127000	0
FNLTGLNEQVPHYR	14	0	1686.85	P67871;G3UZA4;G3UZJ5;G3UZX4;G3UWU5	P67871	34	47	Csnk2b	Casein kinase II subunit beta	yes	no	2	0.012147	43.512	30053000	0	0	30053000	0	0	0	14391000	0
FNPETDFLTGK	11	0	1267.61	Q99KI0	Q99KI0	507	517	Aco2	Aconitate hydratase, mitochondrial	yes	yes	2	0.0016673	81.338	141910000	0	104970000	0	36938000	0	98060000	0	18266000
FNPFVTSDR	9	0	1081.52	B1ARA3;P61255;B1ARA5	B1ARA3	3	11	Rpl26	60S ribosomal protein L26	yes	no	2	0.012923	84.227	55178000	0	0	0	55178000	0	0	0	27285000
FNQVLDQFGEK	11	0	1323.65	P14685;F7B7L8	P14685	371	381	Psmd3	26S proteasome non-ATPase regulatory subunit 3	yes	no	2	0.0012414	89.247	82568000	42166000	40402000	0	0	42166000	37742000	0	0
FNSANEDNVTQVR	13	0	1492.69	P24270	P24270	432	444	Cat	Catalase	yes	yes	2	0.00039014	82.417	97457000	53101000	0	0	44355000	53101000	0	0	21934000
FNSLNELVDYHR	12	0	1505.73	B1AT92;Q60631	B1AT92	125	136	Grb2	Growth factor receptor-bound protein 2	yes	no	2;3	0.0027983	75.294	73231000	55857000	17375000	0	0	55857000	16231000	0	0
FNSVVTNPQGHYNPSTGK	18	0	1945.93	Q02105	Q02105	141	158	C1qc	Complement C1q subcomponent subunit C	yes	yes	2;3	4.0872e-05	59.512	225580000	0	0	107810000	117770000	0	0	51625000	58237000
FNVPVSLESK	10	0	1118.6	Q9D1J3;A0A1W2P7G2;A0A1W2P6N2	Q9D1J3	110	119	Sarnp	SAP domain-containing ribonucleoprotein	yes	no	2	0.010803	72.607	109510000	26526000	27441000	0	55538000	26526000	25634000	0	27463000
FNVSATPEQYVPYSTTR	17	0	1958.94	A0A0R4J275;Q7TMF3	A0A0R4J275	119	135	Ndufa12	NADH dehydrogenase [ubiquinone] 1 alpha subcomplex subunit 12	yes	no	2	0.00033777	68.069	25499000	0	0	25499000	0	0	0	12210000	0
FNVWDTAGQEK	11	0	1293.6	P62827;Q14AA6;Q61820	P62827	61	71	Ran;1700009N14Rik;Rasl2-9	GTP-binding nuclear protein Ran;GTP-binding nuclear protein Ran, testis-specific isoform	yes	no	2	6.8301e-06	121.73	846500000	225260000	247320000	201040000	172880000	225260000	231040000	96272000	85487000
FPAEDEFPDLSSHNNHMAK	19	0	2184.95	Q04447	Q04447	14	32	Ckb	Creatine kinase B-type	yes	yes	4	0.00029758	43.794	44079000	20622000	23457000	0	0	20622000	21913000	0	0
FPGQLNADLR	10	0	1129.59	Q9ERD7;P68372;P99024;Q7TMM9;Q922F4;A2AQ07;Q9CWF2;Q9D6F9	P68372	242	251	Tubb3;Tubb4b;Tubb5;Tubb2a;Tubb6;Tubb1;Tubb2b;Tubb4a	Tubulin beta-3 chain;Tubulin beta-4B chain;Tubulin beta-5 chain;Tubulin beta-2A chain;Tubulin beta-6 chain;Tubulin beta-1 chain;Tubulin beta-2B chain;Tubulin beta-4A chain	no	no	2	3.4987e-19	161.79	4120300000	672210000	805070000	1496000000	1147000000	672210000	752070000	716350000	567200000
FPGQLNADLRK	11	1	1257.68	Q9ERD7;P68372;P99024;Q7TMM9;Q922F4;A2AQ07;Q9CWF2;Q9D6F9	P68372	242	252	Tubb3;Tubb4b;Tubb5;Tubb2a;Tubb6;Tubb1;Tubb2b;Tubb4a	Tubulin beta-3 chain;Tubulin beta-4B chain;Tubulin beta-5 chain;Tubulin beta-2A chain;Tubulin beta-6 chain;Tubulin beta-1 chain;Tubulin beta-2B chain;Tubulin beta-4A chain	no	no	2;3	4.3998e-12	125.74	2173600000	165680000	256050000	962210000	789660000	165680000	239190000	460760000	390490000
FPLTTESAMK	10	0	1123.56	P62751	P62751	79	88	Rpl23a	60S ribosomal protein L23a	yes	yes	2	0.036212	55.064	10980000	10980000	0	0	0	10980000	0	0	0
FPNQNQTK	8	0	975.477	P56391	P56391	21	28	Cox6b1	Cytochrome c oxidase subunit 6B1	yes	yes	2	0.012087	86.472	0	0	0	0	0	0	0	0	0
FPQLDDTSFANSR	13	0	1496.69	P19096;A0A0U1RNJ1	P19096	1705	1717	Fasn	Fatty acid synthase;[Acyl-carrier-protein] S-acetyltransferase;[Acyl-carrier-protein] S-malonyltransferase;3-oxoacyl-[acyl-carrier-protein] synthase;3-oxoacyl-[acyl-carrier-protein] reductase;3-hydroxyacyl-[acyl-carrier-protein] dehydratase;Enoyl-[acyl-carrier-protein] reductase;Oleoyl-[acyl-carrier-protein] hydrolase	yes	no	2	0.001642	73.435	152240000	69807000	82429000	0	0	69807000	77002000	0	0
FPSLLTHNENMVAK	14	0	1599.81	A0A3B2WDD2;A0A3B2WBL1;Q5XJF6;A0A3B2W824;P53026	A0A3B2WDD2	107	120	Rpl10a	Ribosomal protein;60S ribosomal protein L10a	yes	no	3	0.014847	41.227	10615000	10615000	0	0	0	10615000	0	0	0
FQDLGAAYEVLSDSEKR	17	1	1926.93	Q99KV1	Q99KV1	67	83	Dnajb11	DnaJ homolog subfamily B member 11	yes	yes	3	0.00027584	65.107	183980000	0	0	97082000	86901000	0	0	46488000	42972000
FQHVGTSVFLSVTGEQYGNPIR	22	0	2435.22	Q9ESP1	Q9ESP1	162	183	Sdf2l1	Stromal cell-derived factor 2-like protein 1	yes	yes	3	4.2005e-05	46.178	59159000	0	0	0	59159000	0	0	0	29254000
FQILEGPPESMGR	13	0	1459.71	P50396;D6RI86	P50396	56	68	Gdi1	Rab GDP dissociation inhibitor alpha	yes	no	2	0.0017982	80.706	459870000	109420000	117060000	108300000	125090000	109420000	109360000	51858000	61856000
FQMPDQGMTSADDFFQGTK	19	0	2149.91	O08553	O08553	76	94	Dpysl2	Dihydropyrimidinase-related protein 2	yes	yes	3	0.024366	27.324	38447000	38447000	0	0	0	38447000	0	0	0
FQRPGDPQSAQDK	13	1	1472.7	E9Q4Q2;D3YZC9;D3YZD0;Q64213	E9Q4Q2	294	306	Sf1	Splicing factor 1	yes	no	2	0.0023925	80.037	104460000	0	0	49949000	54515000	0	0	23919000	26958000
FQSLGVAFYR	10	0	1186.61	P51150;A0A0N4SVR6;A0A0N4SVG9	P51150	70	79	Rab7a	Ras-related protein Rab-7a	yes	no	2	0.026334	60.59	49663000	25487000	0	24177000	0	25487000	0	11577000	0
FQSSHHSTDITSLDQYVER	19	0	2249.03	P08113;F7C312	P08113	512	530	Hsp90b1	Endoplasmin	yes	no	4	3.9886e-06	78.661	361750000	0	0	197140000	164610000	0	0	94403000	81400000
FQWDLNAWTK	10	0	1307.63	Q62318	Q62318	392	401	Trim28	Transcription intermediary factor 1-beta	yes	yes	2	0.0048637	85.731	76510000	0	0	42001000	34509000	0	0	20112000	17065000
FRCPEALFQPSFLGMESCGIHETTFNSIMK	30	1	3533.62	P60710;E9Q1F2;F8WGM8;P63260	P63260	255	284	Actb;Actg1	Actin, cytoplasmic 1;Actin, cytoplasmic 1, N-terminally processed;Actin, cytoplasmic 2;Actin, cytoplasmic 2, N-terminally processed	no	no	4	0.0022007	27.686	53309000	0	0	0	53309000	0	0	0	26361000
FRHENIIGINDIIR	14	1	1708.94	P63085	P63085	76	89	Mapk1	Mitogen-activated protein kinase 1	yes	yes	3	0.018422	40.211	59744000	33595000	26149000	0	0	33595000	24428000	0	0
FRPLNEAEILR	11	1	1356.75	P28738	P28738	15	25	Kif5c	Kinesin heavy chain isoform 5C	yes	yes	2;3	0.0069282	68.355	29216000	29216000	0	0	0	29216000	0	0	0
FSALQQTLPAENTDNRR	17	1	1959.98	A0A0J9YUS5;E9PVC6;E9Q9E1;E9PVC5;Q6NZJ6	A0A0J9YUS5	828	844	Eif4g1	Eukaryotic translation initiation factor 4 gamma 1	yes	no	3	0.022722	32.995	15024000	15024000	0	0	0	15024000	0	0	0
FSDHVALLSVFQAWDDAR	18	0	2076.01	A0A087WPL5;E9QNN1;O70133	A0A087WPL5	914	931	Dhx9	ATP-dependent RNA helicase A	yes	no	3	5.565e-06	105.28	52162000	0	0	25853000	26309000	0	0	12380000	13010000
FSEVATQYSEDK	12	0	1402.63	Q9CWW6	Q9CWW6	64	75	Pin4	Peptidyl-prolyl cis-trans isomerase NIMA-interacting 4	yes	yes	2	0.00078126	83.862	83574000	0	0	50899000	32675000	0	0	24373000	16158000
FSEVLKR	7	1	877.502	Q04447	Q04447	308	314	Ckb	Creatine kinase B-type	yes	yes	2	2.6599e-13	148.28	0	0	0	0	0	0	0	0	0
FSGDLDDQTCR	11	0	1312.54	P32067;F6SXM5	P32067	235	245	Ssb	Lupus La protein homolog	yes	no	2	0.022013	50.353	28224000	28224000	0	0	0	28224000	0	0	0
FSLDALSLR	9	0	1020.56	Q8R1Q8	Q8R1Q8	134	142	Dync1li1	Cytoplasmic dynein 1 light intermediate chain 1	yes	yes	2	0.024086	60.436	0	0	0	0	0	0	0	0	0
FSLIDLAGNER	11	0	1233.64	F8VQ42;E0CZ72;P28740	F8VQ42	436	446	Kif2a	Kinesin-like protein;Kinesin-like protein KIF2A	yes	no	2	0.030413	46.001	24781000	24781000	0	0	0	24781000	0	0	0
FSMVQVWPVR	10	0	1247.65	P50516;D3Z1B9	P50516	203	212	Atp6v1a	V-type proton ATPase catalytic subunit A	yes	no	2	0.0020686	100.45	57335000	20624000	0	18057000	18654000	20624000	0	8647000	9224200
FSNEEIAMATVTALRR	16	1	1807.93	A6ZI44;P05064;Q9CPQ9;A6ZI46	A6ZI44	298	313	Aldoa;Aldoart1	Fructose-bisphosphate aldolase;Fructose-bisphosphate aldolase A	yes	no	3	0.00078989	62.378	41160000	20980000	20181000	0	0	20980000	18852000	0	0
FSNISAAK	8	0	836.439	P80315;G5E839;G3UYW5;G3UXF3;G3UXG2	P80315	35	42	Cct4	T-complex protein 1 subunit delta	yes	no	1	0.023248	73.665	35143000	0	35143000	0	0	0	32830000	0	0
FSPAGPILSIR	11	0	1156.66	P29341;Q9D4E6;A0A2I3BR37	P29341	31	41	Pabpc1;Pabpc6	Polyadenylate-binding protein 1;Polyadenylate-binding protein	yes	no	2	0.020249	51.268	25504000	0	25504000	0	0	0	23825000	0	0
FSPEVPGQK	9	0	987.503	P14873	P14873	90	98	Map1b	Microtubule-associated protein 1B;MAP1B heavy chain;MAP1 light chain LC1	yes	yes	2	0.024541	71.877	50622000	26011000	0	0	24611000	26011000	0	0	12170000
FSPLTANLMNLLAENGR	17	0	1859.96	Q9DB20;F7D3P8	Q9DB20	101	117	Atp5o	ATP synthase subunit O, mitochondrial	yes	no	3	0.00030258	36.451	19243000	0	0	19243000	0	0	0	9214600	0
FSPNSSNPIIVSCGWDK	17	0	1906.89	P68040	P68040	156	172	Gnb2l1	Guanine nucleotide-binding protein subunit beta-2-like 1;Guanine nucleotide-binding protein subunit beta-2-like 1, N-terminally processed	yes	yes	2	0.0088437	50.563	47950000	0	0	0	47950000	0	0	0	23711000
FSSEELDKLWR	11	1	1408.7	P55302	P55302	167	177	Lrpap1	Alpha-2-macroglobulin receptor-associated protein	yes	yes	3	0.012269	68.069	9686500	0	9686500	0	0	0	9048800	0	0
FSTPEQAAK	9	0	977.482	G5E924;Q8R081;G3UY38	G5E924	511	519	Hnrnpl	Heterogeneous nuclear ribonucleoprotein L	yes	no	2	0.0049225	107.66	157490000	30840000	0	60855000	65795000	30840000	0	29141000	32535000
FSVCVLGDQQHCDEAK	16	0	1891.82	A0A3B2WDD2;A0A3B2WBL1;Q5XJF6;A0A3B2W824;A0A3B2W820	A0A3B2WDD2	36	51	Rpl10a	Ribosomal protein	yes	no	2;3	0.00067146	42.338	379690000	201590000	178100000	0	0	201590000	166380000	0	0
FSVSPVVR	8	0	889.502	P58252	P58252	499	506	Eef2	Elongation factor 2	yes	yes	2	0.038337	78.178	103210000	0	103210000	0	0	0	96419000	0	0
FTADELQILTYQLCHTYVR	19	0	2370.17	A0A6I8MX18;Q8CJG1;H3BJ70	A0A6I8MX18	772	790	Ago1	Protein argonaute-1	yes	no	3	2.4204e-05	59.003	49929000	0	0	29587000	20342000	0	0	14168000	10059000
FTASAGIQVVGDDLTVTNPKR	21	1	2188.15	P17182;Q6PHC1	P17182	307	327	Eno1	Alpha-enolase	yes	no	3	0.02186	19.868	40198000	40198000	0	0	0	40198000	0	0	0
FTAVEDQYYCVDCYK	15	0	1959.8	A2AEX8;A2AEX6;P97447;A2AEY1;A2AEY2	A2AEX8	216	230	Fhl1	Four and a half LIM domains protein 1	yes	no	2	0.0022231	59.426	28550000	28550000	0	0	0	28550000	0	0	0
FTDEEVDELYR	11	0	1414.63	Q6ZWQ9;Q3THE2	Q6ZWQ9	134	144	Myl12a;Myl12b	Myosin regulatory light chain 12B	yes	no	2	0.0047091	65.347	107800000	55032000	52765000	0	0	55032000	49291000	0	0
FTDILVR	7	0	862.491	O35286;Q497W9;A0A0G2JG10	O35286	146	152	Dhx15	Pre-mRNA-splicing factor ATP-dependent RNA helicase DHX15	yes	no	2	0.019341	126.24	94656000	0	48787000	21946000	23922000	0	45575000	10509000	11830000
FTGSGSGTDFTLK	13	0	1316.62	A0A0B4J1H8	A0A0B4J1H8	87	99	Igkv1-133		no	no	2;3	2.3985e-35	166.97	233340000000	556290000	578160000	122410000000	109800000000	556290000	540100000	58618000000	54294000000
FTGSGSGTDFTLKISR	16	1	1672.84	A0A0B4J1H8	A0A0B4J1H8	87	102	Igkv1-133		no	no	2;3	8.246e-25	145.69	1054200000	0	0	521080000	533110000	0	0	249530000	263620000
FTISDHPQPIDPLLK	15	0	1719.92	Q6ZQ38	Q6ZQ38	991	1005	Cand1	Cullin-associated NEDD8-dissociated protein 1	yes	yes	3	0.0080731	35.891	50497000	0	50497000	0	0	0	47172000	0	0
FTLDCTHPVEDGIMDAANFEQFLQER	26	0	3082.38	P67984	P67984	21	46	Rpl22	60S ribosomal protein L22	yes	yes	3;4	1.358e-06	49.287	203110000	0	0	104950000	98161000	0	0	50255000	48541000
FTNIGPDTMR	10	0	1150.54	B9EHT6;A0A087WSN6;Q3UHL6;A0A087WR50;P11276;B7ZNJ1;A0A087WS56	B9EHT6	1274	1283	Fn1	Fibronectin;Anastellin	yes	no	2	0.027366	56.432	26096000	0	26096000	0	0	0	24378000	0	0
FTPGTFTNQIQAAFR	15	0	1697.85	P14206;A0A1L1SRW0	P14206	103	117	Rpsa	40S ribosomal protein SA	yes	no	2	0.00052096	116.23	765700000	0	0	398520000	367180000	0	0	190840000	181570000
FTQAGSEVSALLGR	14	0	1434.75	P56480	P56480	311	324	Atp5b	ATP synthase subunit beta, mitochondrial	yes	yes	2;3	0.00096799	100.55	4104300	4104300	0	0	0	4104300	0	0	0
FTSAGQASK	9	0	895.44	Q921F4	Q921F4	487	495	Hnrnpll	Heterogeneous nuclear ribonucleoprotein L-like	yes	yes	2	0.011241	68.224	0	0	0	0	0	0	0	0	0
FTVTPSTTQVVGILK	15	0	1589.9	P47754	P47754	179	193	Capza2	F-actin-capping protein subunit alpha-2	yes	yes	2	0.0042162	51.436	45491000	0	45491000	0	0	0	42496000	0	0
FVADGIFK	8	0	895.48	P62908;D3YV43;A0A140LI77	P62908	11	18	Rps3	40S ribosomal protein S3	yes	no	2	0.038337	78.178	279330000	0	0	142720000	136610000	0	0	68341000	67555000
FVAVTSSNAAK	11	0	1093.58	Q9EQF6	Q9EQF6	373	383	Dpysl5	Dihydropyrimidinase-related protein 5	yes	yes	2	2.5434e-07	125.16	246080000	73987000	53810000	65048000	53232000	73987000	50268000	31149000	26323000
FVDGLMIHSGDPVNYYVDTAVR	22	0	2467.18	P62908	P62908	152	173	Rps3	40S ribosomal protein S3	yes	yes	2;3	2.3732e-08	62.684	521590000	0	0	256940000	264660000	0	0	123040000	130870000
FVDWIER	7	0	963.481	P20918	P20918	801	807	Plg	Plasminogen;Plasmin heavy chain A;Activation peptide;Angiostatin;Plasmin heavy chain A, short form;Plasmin light chain B	yes	yes	2	0.042937	105.39	98354000	0	98354000	0	0	0	91879000	0	0
FVFDRPLPVSR	11	1	1331.73	Q9R1P4;A0A1B0GS70	Q9R1P4	97	107	Psma1	Proteasome subunit alpha type-1	yes	no	3	0.00026326	107.03	147460000	0	0	83730000	63733000	0	0	40095000	31516000
FVFHNEQVYCPDCAK	15	0	1912.82	A2AEX8;A2AEX6;P97447	A2AEX8	280	294	Fhl1	Four and a half LIM domains protein 1	yes	no	3	0.0044681	41.014	174800000	82277000	92520000	0	0	82277000	86429000	0	0
FVFSLVDAMNGK	12	0	1326.66	P08249	P08249	258	269	Mdh2	Malate dehydrogenase, mitochondrial	yes	yes	2	3.2055e-06	120.99	338070000	0	0	175170000	162900000	0	0	83882000	80555000
FVGQDVEGER	10	0	1134.53	P70698	P70698	499	508	Ctps1	CTP synthase 1	yes	yes	2	0.016567	66.692	12402000	6672300	5730000	0	0	6672300	5352800	0	0
FVIATSTK	8	0	865.491	P47911	P47911	201	208	Rpl6	60S ribosomal protein L6	yes	yes	2	0.035809	85.212	32182000	0	0	32182000	0	0	0	15410000	0
FVIGGPQGDAGLTGR	15	0	1443.75	A0A0U1RNT6;A0A0U1RNK6;Q3THS6	A0A0U1RNT6	250	264	Mat2a	S-adenosylmethionine synthase isoform type-2	yes	no	2	0.006814	56.225	48075000	48075000	0	0	0	48075000	0	0	0
FVINYDYPNSSEDYIHR	17	0	2130.96	Q8BTS0;Q61656	Q8BTS0	412	428	Ddx5	Probable ATP-dependent RNA helicase DDX5	yes	no	3	0.00018388	58.671	337590000	0	0	150930000	186660000	0	0	72272000	92304000
FVINYDYPNSSEDYVHR	17	0	2116.95	Q3U741;Q501J6	Q3U741	410	426	Ddx17	Probable ATP-dependent RNA helicase DDX17	yes	no	3	3.488e-05	87.148	400560000	0	0	211400000	189160000	0	0	101230000	93541000
FVKEPAFEDITLESER	16	1	1908.95	A0A1B0GRU8;A0A6Q6PUT5;Q9R1C7	A0A1B0GRU8	743	758	Prpf40a	Pre-mRNA-processing factor 40 homolog A	yes	no	3	0.0060822	34.277	18212000	18212000	0	0	0	18212000	0	0	0
FVMQEEFSR	9	0	1171.53	P27773	P27773	336	344	Pdia3	Protein disulfide-isomerase A3	yes	yes	2	0.013706	82.452	196760000	0	118090000	45164000	33504000	0	110310000	21627000	16568000
FVNVVPTFGK	10	0	1106.61	A0A494B9Z0;A0A494BBA8;Q642K5;P62862	A0A494B9Z0	46	55	Fau	40S ribosomal protein S30	yes	no	2	0.0016419	108.98	2027700000	49126000	60414000	1006700000	911420000	49126000	56436000	482090000	450700000
FVNVVPTFGKK	11	1	1234.71	A0A494B9Z0;A0A494BBA8;Q642K5;P62862	A0A494B9Z0	46	56	Fau	40S ribosomal protein S30	yes	no	3	0.0019432	72.2	136260000	0	0	76768000	59490000	0	0	36761000	29418000
FVPFAAVAAANCINIPLMR	19	0	2074.09	Q3U4F0;Q91V61;Q99JR1	Q3U4F0	178	196	Sfxn3;Sfxn1	Sideroflexin-3;Sideroflexin-1	yes	no	3	0.001118	31.801	31926000	0	0	15018000	16908000	0	0	7191700	8360900
FVPYLIAGIQHSCQDIGAK	19	0	2116.08	P24547;A0A0A6YY72	P24547	456	474	Impdh2	Inosine-5-monophosphate dehydrogenase 2	yes	no	3	2.5009e-05	43.955	54958000	0	0	54958000	0	0	0	26317000	0
FVQVSEDSGR	10	0	1122.53	A0A087WNM1;Q91Z67;A0A087WRV4	A0A087WNM1	128	137	Srgap2	SLIT-ROBO Rho GTPase-activating protein 2	yes	no	2	0.020595	74.92	33357000	0	0	33357000	0	0	0	15973000	0
FVSISDLFVPK	11	0	1250.69	Q61598;A0A1Y7VLG4	Q61598	380	390	Gdi2	Rab GDP dissociation inhibitor beta	yes	no	2	0.0089455	60.019	33731000	0	0	0	33731000	0	0	0	16680000
FVVQNVSAQK	10	0	1118.61	E9Q0U7;Q61699	E9Q0U7	421	430	Hsph1	Heat shock protein 105 kDa	yes	no	2	0.0078679	77.732	28208000	13691000	14517000	0	0	13691000	13561000	0	0
FWEVISDEHGIDPSGNYVGDSDLQLER	27	0	3076.41	Q9ERD7;A0A1D5RM76	Q9ERD7	20	46	Tubb3	Tubulin beta-3 chain	yes	no	2;3;4	5.0801e-07	33.835	1174100000	0	0	686840000	487260000	0	0	328900000	240950000
FWEVISDEHGIDPTGSYHGDSDLQLER	27	0	3101.4	Q7TMM9;Q9CWF2	Q9CWF2	20	46	Tubb2a;Tubb2b	Tubulin beta-2A chain;Tubulin beta-2B chain	no	no	2;3;4	1.3585e-44	128.52	11570000000	0	0	5588300000	5981900000	0	0	2676000000	2958000000
FWEVISDEHGIDPTGTYHGDSDLQLDR	27	0	3101.4	P99024	P99024	20	46	Tubb5	Tubulin beta-5 chain	yes	yes	4	4.9798e-12	64.377	2824300000	0	0	1531100000	1293200000	0	0	733160000	639500000
FWEVISDEHGIDPTGTYHGDSDLQLER	27	0	3115.42	P68372;Q9D6F9	P68372	20	46	Tubb4b;Tubb4a	Tubulin beta-4B chain;Tubulin beta-4A chain	no	no	3;4	9.8918e-15	103.9	833130000	0	0	471630000	361500000	0	0	225840000	178760000
FWQDLMNIAGTTLSSK	16	0	1810.89	P80314;A0A1W2P7B7	P80314	155	170	Cct2	T-complex protein 1 subunit beta	yes	no	2	0.00088643	68.034	227280000	0	0	113910000	113360000	0	0	54547000	56059000
FYCDYCDTYLTHDSPSVR	18	0	2297.94	Q62241	Q62241	4	21	Snrpc	U1 small nuclear ribonucleoprotein C	yes	yes	3	2.4803e-05	69.605	201590000	49327000	59239000	0	93022000	49327000	55339000	0	45999000
FYEEVHDLER	10	0	1335.61	B7ZNL2;Q78ZA7;A0A140LJB5;Q3TF41;Q8BSH9;P28656	B7ZNL2	84	93	Nap1l4;Nap1l1	Nucleosome assembly protein 1-like 4;Nucleosome assembly protein 1-like 1	no	no	2;3	0.0050369	87.913	490660000	42550000	34646000	206090000	207370000	42550000	32365000	98689000	102550000
FYEEVHDLERK	11	1	1463.7	B7ZNL2;Q78ZA7;A0A140LJB5;Q3TF41;Q8BSH9;P28656	B7ZNL2	84	94	Nap1l4;Nap1l1	Nucleosome assembly protein 1-like 4;Nucleosome assembly protein 1-like 1	no	no	2	0.026159	44.318	16955000	0	0	16955000	0	0	0	8118900	0
FYGDLEKDK	9	1	1113.53	P14211	P14211	56	64	Calr	Calreticulin	yes	yes	3	0.02345	61.78	382550000	0	0	382550000	0	0	0	183190000	0
FYGPEGPYGVFAGR	14	0	1515.71	O55022	O55022	106	119	Pgrmc1	Membrane-associated progesterone receptor component 1	yes	yes	2	0.00038943	103.26	169200000	0	0	88298000	80905000	0	0	42282000	40008000
FYSDSHHLKR	10	1	1288.63	B2RQG2	B2RQG2	1907	1916	Phf3		yes	yes	4	0.029691	33.961	14070000	0	0	0	14070000	0	0	0	6957800
FYSVNVDYSK	10	0	1220.57	A0A0N4SVQ1;Q62425	A0A0N4SVQ1	32	41	Ndufa4	Cytochrome c oxidase subunit NDUFA4	yes	no	2	0.007896	77.677	288860000	0	0	159770000	129090000	0	0	76509000	63835000
FYTEDSPGLK	10	0	1155.54	Q9CQS8;E9PW43	Q9CQS8	58	67	Sec61b;Gm10320	Protein transport protein Sec61 subunit beta	yes	no	2	0.0045442	88.948	36550000	36550000	0	0	0	36550000	0	0	0
FYTEKDPSYFVFLYLTK	17	1	2160.08	Q8C167	Q8C167	242	258	Prepl	Prolyl endopeptidase-like	yes	yes	3	0.0023953	34.094	8482100	0	0	8482100	0	0	0	4061700	0
FYTLIPHDFGMK	12	0	1467.72	Q921K2;P11103	Q921K2	736	747	Parp1	Poly [ADP-ribose] polymerase 1	yes	no	3	0.041255	31.639	5817700	5817700	0	0	0	5817700	0	0	0
FYVHNDIFR	9	0	1209.59	P97855	P97855	124	132	G3bp1	Ras GTPase-activating protein-binding protein 1	yes	yes	2;3	0.0026637	87.308	452270000	26403000	19198000	209300000	197370000	26403000	17934000	100220000	97600000
FYVHNDMFR	9	0	1227.55	P97379;A0A0J9YTQ8	P97379	124	132	G3bp2	Ras GTPase-activating protein-binding protein 2	yes	no	3	0.0060117	78.334	69647000	0	0	32240000	37407000	0	0	15438000	18498000
GAAGALLVYDITR	13	0	1318.72	P53994;Q3TEG7;P59279;A0A1D5RMH1;S4R232	P53994	78	90	Rab2a;Rab2b;Rab4b	Ras-related protein Rab-2A;Ras-related protein Rab-2B	yes	no	2	0.00096535	78.939	52683000	22591000	30092000	0	0	22591000	28110000	0	0
GAAGALMVYDITR	13	0	1336.68	Q91V41;Q50HX3;A0A2R8VHW9	Q91V41	83	95	Rab14	Ras-related protein Rab-14	yes	no	2	0.0015467	84.213	89695000	0	89695000	0	0	0	83790000	0	0
GAAGRPLELSDFR	13	1	1387.72	Q61029	Q61029	368	380	Tmpo	Lamina-associated polypeptide 2, isoforms beta/delta/epsilon/gamma	yes	yes	2;3	4.3772e-05	96.313	671840000	77398000	0	329780000	264660000	77398000	0	157920000	130880000
GAAQNIIPASTGAAK	15	0	1368.74	A0A0A0MQF6;P16858;S4R1W1;A0A1D5RLD8;S4R257	A0A0A0MQF6	225	239	Gapdh;Gm3839	Glyceraldehyde-3-phosphate dehydrogenase	yes	no	2	0.0003838	80.979	4857700000	1155800000	977140000	1409400000	1315300000	1155800000	912810000	674920000	650410000
GAATSGPAPR	10	0	883.451	A0A0R4J0B4;A0A0N4SW65;A0A0N4SWC3	A0A0R4J0B4	7	16			yes	no	2	0.0049862	84.498	3397700	3397700	0	0	0	3397700	0	0	0
GAAVDEYFR	9	0	1026.48	D3YUP1;Q9WVG6	D3YUP1	329	337	Carm1	Histone-arginine methyltransferase CARM1	yes	no	2	0.00037642	124.83	14030000	7278900	6751300	0	0	7278900	6306800	0	0
GACHGQTGMFPR	12	0	1317.57	B1AT92;Q60631	B1AT92	182	193	Grb2	Growth factor receptor-bound protein 2	yes	no	3	0.0044245	51.286	22810000	11962000	10848000	0	0	11962000	10134000	0	0
GADIMYTGTLDCWR	14	0	1657.72	P48962	P48962	246	259	Slc25a4	ADP/ATP translocase 1	yes	yes	2	0.038704	43.084	33163000	0	0	0	33163000	0	0	0	16399000
GAEAANVTGPGGVPVQGSK	19	0	1694.86	P62960;A2BGG7	P62960	117	135	Ybx1	Nuclease-sensitive element-binding protein 1	yes	no	2	6.4524e-05	62.081	133830000	0	0	61968000	71857000	0	0	29674000	35533000
GAEEMETVIPVDVMR	15	0	1674.8	A2A817;A2A816;A2A815;A2A813;Q99LX0	A2A817	13	27	Park7	Protein deglycase DJ-1	yes	no	2;3	0.0046677	50.284	80058000	2513800	77545000	0	0	2513800	72439000	0	0
GAEILEVLHSLPAVR	15	0	1602.91	Q99JI4;A0A286YDW8	Q99JI4	243	257	Psmd6	26S proteasome non-ATPase regulatory subunit 6	yes	no	2	0.029843	33.886	10340000	0	10340000	0	0	0	9658900	0	0
GAEIVADTFR	10	0	1077.55	Q99LD8;O08972;G3UZR0	Q99LD8	148	157	Ddah2	N(G),N(G)-dimethylarginine dimethylaminohydrolase 2	yes	no	2	0.0019219	100.98	23354000	0	23354000	0	0	0	21816000	0	0
GAFGKPQGTVAR	12	1	1187.64	I7HLV2;Q6ZWV3;P86048	I7HLV2	117	128	Rpl10;Rpl10l	60S ribosomal protein L10;60S ribosomal protein L10-like	yes	no	2;3	0.0030851	77.049	173380000	25523000	30815000	54804000	62235000	25523000	28786000	26243000	30775000
GAKEEHGGLIR	11	1	1165.62	Q80XR5;P26369	Q80XR5	68	78	U2af2	Splicing factor U2AF 65 kDa subunit	yes	no	2;3	0.014799	57.55	56487000	8400900	48086000	0	0	8400900	44920000	0	0
GALPLDTVTFYK	12	0	1323.71	P57759;F8WJI4;F8WIM7;D6RG87	P57759	39	50	Erp29	Endoplasmic reticulum resident protein 29	yes	no	2	0.025692	43.512	36486000	0	36486000	0	0	0	34084000	0	0
GANDFMCDEMER	12	0	1473.53	P11983	P11983	379	390	Tcp1	T-complex protein 1 subunit alpha	yes	yes	2	0.0015106	77.379	154260000	0	59990000	53876000	40394000	0	56040000	25799000	19975000
GANPVEIR	8	0	854.461	P63038;D3Z2F2;D3Z7J9	P63038	134	141	Hspd1	60 kDa heat shock protein, mitochondrial	yes	no	2	0.034271	89.123	110810000	0	26755000	40392000	43663000	0	24994000	19342000	21591000
GAPGQPGTILR	11	0	1065.59	B1AUX2;Q61191	B1AUX2	837	847	Hcfc1	Host cell factor 1;HCF N-terminal chain 1;HCF N-terminal chain 2;HCF N-terminal chain 3;HCF N-terminal chain 4;HCF N-terminal chain 5;HCF N-terminal chain 6;HCF C-terminal chain 1;HCF C-terminal chain 2;HCF C-terminal chain 3;HCF C-terminal chain 4;HCF C-terminal chain 5;HCF C-terminal chain 6	yes	no	2	0.022617	50.04	2686100	0	2686100	0	0	0	2509300	0	0
GAPLVVICQGK	11	0	1140.63	Q3TT92;E9PWE8;Q62188	Q3TT92	439	449	Dpysl3	Dihydropyrimidinase-related protein 3	yes	no	2	6.8301e-06	147.52	599460000	110050000	119830000	169600000	199980000	110050000	111940000	81213000	98892000
GASAASSPAPK	11	0	942.477	Q80ZM5	Q80ZM5	128	138	H1fx		yes	yes	2	0.0027154	71.451	6572500	0	6572500	0	0	0	6139700	0	0
GASGSFVVVQK	11	0	1077.58	Z4YKB8;Q3TEA8;Z4YKA3;A2AM65;A2AM63	Z4YKB8	225	235	Hp1bp3	Heterochromatin protein 1-binding protein 3	yes	no	2	0.0042928	66.621	9934700	9934700	0	0	0	9934700	0	0	0
GASQAGMLAPGTR	13	0	1215.6	A0A0G2JDV8;Q9DAW9;A0A0G2JFI6	A0A0G2JDV8	167	179	Cnn3	Calponin-3	yes	no	2	0.0012233	77.379	123660000	45158000	43615000	34890000	0	45158000	40743000	16707000	0
GASQAGMTGYGMPR	14	0	1382.61	Q9WVA4;Q9R1Q8	Q9R1Q8	183	196	Tagln2;Tagln3	Transgelin-2;Transgelin-3	no	no	2	0.0020759	77.379	22760000	22760000	0	0	0	22760000	0	0	0
GATQGPSTGTVPQATK	16	0	1499.76	Q8R1N0	Q8R1N0	87	102	Znf830	Zinc finger protein 830	yes	yes	2	0.0011995	56.951	81334000	0	0	81334000	0	0	0	38947000	0
GATQQILDEAER	12	0	1329.65	P80314	P80314	377	388	Cct2	T-complex protein 1 subunit beta	yes	yes	2	0.0020493	85.377	374360000	183040000	191330000	0	0	183040000	178730000	0	0
GATYGKPVHHGVNQLK	16	1	1704.91	Q9CZM2;B8JKK2	Q9CZM2	78	93	Rpl15	60S ribosomal protein L15;Ribosomal protein L15	yes	no	2;3	0.00086946	114.71	165140000	22936000	23325000	65939000	52937000	22936000	21789000	31575000	26177000
GAVDAAVPTNIIAAK	15	0	1409.79	A0A0A6YWP6;A0A0A6YX18;Q8BVE3;A0A0A6YVU0	A0A0A6YWP6	8	22	Atp6v1h	V-type proton ATPase subunit H	yes	no	2	0.026938	34.231	37646000	37646000	0	0	0	37646000	0	0	0
GAVIVVSHDAR	11	0	1122.61	Q6P542	Q6P542	782	792	Abcf1	ATP-binding cassette sub-family F member 1	yes	yes	2	0.012402	56.729	5428200	2639100	2789100	0	0	2639100	2605500	0	0
GAVQFVTQYQHSSGQR	16	0	1791.87	E9Q1S3;Q01405	E9Q1S3	448	463	Sec23a	Protein transport protein Sec23A	yes	no	3	0.040828	26.292	17100000	17100000	0	0	0	17100000	0	0	0
GAWSNVLR	8	0	901.477	P48962;P51881	P48962	273	280	Slc25a4;Slc25a5	ADP/ATP translocase 1;ADP/ATP translocase 2;ADP/ATP translocase 2, N-terminally processed	no	no	2	0.00011452	132.72	198990000	70253000	69083000	30915000	28741000	70253000	64535000	14804000	14212000
GAYIHALDNGLFTLGAPHR	19	0	2022.04	P97376	P97376	67	85	Frg1	Protein FRG1	yes	yes	3	0.001175	41.348	41112000	0	0	0	41112000	0	0	0	20330000
GCAFVTFSTR	10	0	1144.53	A0A0R4J2B0;V9GX43;S4R2U7;S4R1S7;E9QA47;Q9Z0H4;S4R2S7	A0A0R4J2B0	149	158	Celf2	CUGBP Elav-like family member 2	yes	no	2	0.025702	57.96	11045000	0	11045000	0	0	0	10318000	0	0
GCAVVEFK	8	0	908.443	Q9D0E1;B8JK33;B8JK32;A0A3Q4EH91	Q9D0E1	112	119	Hnrnpm	Heterogeneous nuclear ribonucleoprotein M	yes	no	1	0.030191	67.032	25889000	0	25889000	0	0	0	24184000	0	0
GCCFVTFYTR	10	0	1309.56	A0A0R4J2B0;V9GX43;S4R2U7;S4R1S7;E9QA47;Q9Z0H4;S4R2J2;S4R2L5;A3KGT0;A0A0R4J0T5;P28659	A0A0R4J2B0	60	69	Celf2;Celf1	CUGBP Elav-like family member 2;CUGBP Elav-like family member 1	yes	no	2	0.0022472	99.802	134750000	16673000	0	56831000	61245000	16673000	0	27214000	30286000
GCDVVVIPAGVPR	13	0	1337.71	P08249;A0A0G2JF23	P08249	92	104	Mdh2	Malate dehydrogenase, mitochondrial	yes	no	2	0.00030493	91.867	598780000	228120000	223520000	56698000	90438000	228120000	208810000	27150000	44722000
GCEVVVSGK	9	0	933.459	P62908;D3YV43	P62908	133	141	Rps3	40S ribosomal protein S3	yes	no	2	0.0070085	99.442	124300000	0	0	0	124300000	0	0	0	61466000
GCHLLVATPGR	11	0	1179.62	Q62167;P16381;Q62095	Q62167	316	326	Ddx3x;D1Pas1;Ddx3y	ATP-dependent RNA helicase DDX3X;Putative ATP-dependent RNA helicase Pl10;ATP-dependent RNA helicase DDX3Y	yes	no	2;3	0.023818	49.418	29604000	29604000	0	0	0	29604000	0	0	0
GCILTLVER	9	0	1059.57	Q8R1B4	Q8R1B4	440	448	Eif3c	Eukaryotic translation initiation factor 3 subunit C	yes	yes	2	0.021491	72.485	3976700	3976700	0	0	0	3976700	0	0	0
GCITIIGGGDTATCCAK	17	0	1753.78	P09411	P09411	366	382	Pgk1	Phosphoglycerate kinase 1	yes	yes	2	0.00058513	57.348	117020000	59068000	57953000	0	0	59068000	54138000	0	0
GCIVDANLSVLNLVIVK	17	0	1826.03	P62754	P62754	99	115	Rps6	40S ribosomal protein S6	yes	yes	2	0.026999	32.946	15452000	15452000	0	0	0	15452000	0	0	0
GCTATLGNFAK	11	0	1138.54	P25444;D3YVC1;D3YWJ3	P25444	228	238	Rps2	40S ribosomal protein S2	yes	no	2	0.00076841	97.635	162470000	0	73581000	88893000	0	0	68736000	42567000	0
GCWDSIHVVEVQEK	14	0	1684.79	P47757;A2AMW0;F7CAZ6	P47757	146	159	Capzb	F-actin-capping protein subunit beta	yes	no	3	0.0014898	50.155	46402000	18134000	28269000	0	0	18134000	26408000	0	0
GDACEGDSGGPFVMK	15	0	1525.62	H7BX99;P19221	H7BX99	557	571	F2	Prothrombin;Prothrombin;Activation peptide fragment 1;Activation peptide fragment 2;Thrombin light chain;Thrombin heavy chain	yes	no	2	0.0064793	45.661	489960000	243300000	246660000	0	0	243300000	230420000	0	0
GDATVSYEDPPTAK	14	0	1449.66	Q5SUT0;Q5SUS9;Q61545	Q5SUT0	373	386	Ewsr1	RNA-binding protein EWS	yes	no	2	0.00092422	78.342	2842400000	296540000	300070000	1066000000	1179800000	296540000	280310000	510440000	583410000
GDEELDSLIK	10	0	1117.55	Q3THW5;P0C0S6;Q8R029;Q3UA95	Q3THW5	93	102	H2afv;H2afz	Histone H2A.V;Histone H2A.Z;Histone H2A	yes	no	2	0.0015719	107.69	1914200000	183860000	213900000	760190000	756240000	183860000	199810000	364020000	373960000
GDFCIQVGR	9	0	1050.49	Q5NC80;P15532;E9PZF0;Q01768	E9PZF0	106	114	Nme1;Gm20390;Nme2	Nucleoside diphosphate kinase;Nucleoside diphosphate kinase A;Nucleoside diphosphate kinase B	no	no	2	0.036737	64.567	17724000	17724000	0	0	0	17724000	0	0	0
GDGPICLVLAPTR	13	0	1367.72	Q8BTS0;Q61656;S4R1I6;B1ARB9;Q3U741;Q501J6;Q3TU25	Q8BTS0	165	177	Ddx5;Ddx17	Probable ATP-dependent RNA helicase DDX5;Probable ATP-dependent RNA helicase DDX17	no	no	2	0.0015281	67.153	1041700000	251810000	283030000	264000000	242910000	251810000	264390000	126420000	120120000
GDGVVLVAPPLR	12	0	1191.7	P62311	P62311	89	100	Lsm3	U6 snRNA-associated Sm-like protein LSm3	yes	yes	2	0.0026768	65.224	29141000	0	0	29141000	0	0	0	13954000	0
GDLGIEIPAEK	11	0	1140.6	P52480;E9Q509;G3X925;P53657	P52480	295	305	Pkm;Pklr	Pyruvate kinase PKM;Pyruvate kinase;Pyruvate kinase PKLR	yes	no	2	0.0013672	86.882	766070000	289610000	306060000	83341000	87062000	289610000	285910000	39908000	43052000
GDNITLLQSVSN	12	0	1259.64	P62305	P62305	81	92	Snrpe	Small nuclear ribonucleoprotein E	yes	yes	2	0.0089411	67.334	89230000	0	0	46879000	42350000	0	0	22448000	20942000
GDQALSFLK	9	0	977.518	P48962	P48962	2	10	Slc25a4	ADP/ATP translocase 1	yes	yes	1;2	0.0016141	103.55	116040000	19680000	96364000	0	0	19680000	90020000	0	0
GDQENVHPDVMLVQPR	16	0	1832.88	P70168	P70168	778	793	Kpnb1	Importin subunit beta-1	yes	yes	3	0.00048839	45.33	20763000	0	0	0	20763000	0	0	0	10267000
GDQLALLGR	9	0	941.529	Q9WUU7	Q9WUU7	41	49	Ctsz	Cathepsin Z	yes	yes	2	7.6023e-06	138.9	645120000	0	0	325690000	319430000	0	0	155960000	157960000
GDREQLLQR	9	1	1113.59	P68510	P68510	2	10	Ywhah	14-3-3 protein eta	yes	yes	2	0.0017452	99.815	387360000	32622000	35937000	177990000	140810000	32622000	33571000	85233000	69631000
GDSVIVVLR	9	0	956.565	P62317	P62317	103	111	Snrpd2	Small nuclear ribonucleoprotein Sm D2	yes	yes	2	2.1511e-06	135.84	21660000	0	0	0	21660000	0	0	0	10711000
GDTHPLTLEEILDETQHLDIGLK	23	0	2586.32	Q9D902;A0A087WSE8	Q9D902	93	115	Gtf2e2	General transcription factor IIE subunit 2	yes	no	4	2.5086e-08	81.665	33073000	0	0	23360000	9713500	0	0	11186000	4803300
GDTPGHATPGHGGATSSAR	19	0	1732.79	G5E866;Q99NB9	G5E866	271	289	Sf3b1	Splicing factor 3B subunit 1	yes	no	3	0.00025542	38.271	14599000	0	14599000	0	0	0	13638000	0	0
GDVAEGDLIEHFSQFGAVEK	20	0	2147.02	Q9CX86	Q9CX86	107	126	Hnrnpa0	Heterogeneous nuclear ribonucleoprotein A0	yes	yes	3	0.0002681	43.598	294870000	161610000	133260000	0	0	161610000	124490000	0	0
GDVTAEEAAGASPAK	15	0	1372.65	P28667	P28667	11	25	Marcksl1	MARCKS-related protein	yes	yes	2	0.00024621	84.289	108480000	0	0	52500000	55984000	0	0	25140000	27684000
GDVTITNDGATILK	14	0	1416.75	P80315;G3UYW5	P80315	66	79	Cct4	T-complex protein 1 subunit delta	yes	no	2	0.00306	57.836	119120000	50784000	68335000	0	0	50784000	63836000	0	0
GDYPLEAVR	9	0	1018.51	P52480	P52480	368	376	Pkm	Pyruvate kinase PKM	yes	yes	2	0.012666	85.642	32524000	0	32524000	0	0	0	30383000	0	0
GEADRDTYR	9	1	1081.48	A0A3B2W864;A0A338P7K4;Q3UW83;P63325	P63325	120	128	Rps10	40S ribosomal protein S10	no	no	2;3	0.0088324	81.972	19199000	5998300	13201000	0	0	5998300	12331000	0	0
GEADRDTYRR	10	2	1237.58	A0A3B2W864;A0A338P7K4;Q3UW83;P63325	P63325	120	129	Rps10	40S ribosomal protein S10	no	no	3;4	0.034671	62.303	166710000	149770000	16943000	0	0	149770000	15828000	0	0
GEATAERPGEAAVASSPSK	19	1	1813.88	P26645	P26645	12	30	Marcks	Myristoylated alanine-rich C-kinase substrate	yes	yes	3	7.2349e-09	85.808	229350000	25653000	0	105270000	98420000	25653000	0	50411000	48669000
GEATVSFDDPPSAK	14	0	1419.65	Q8CFQ9;P56959;G3UXT7;F6QCI0;Q8BQ46	Q8CFQ9	327	340	Fus;Taf15	RNA-binding protein FUS	no	no	2	0.0012468	100.72	4383800000	182920000	175210000	2038300000	1987400000	182920000	163670000	976030000	982790000
GEDFYCVTCHETK	13	0	1644.65	A2AEX8;A2AEX6;P97447;A2AEY1;A2AEY2;A2AEX7	A2AEX8	161	173	Fhl1	Four and a half LIM domains protein 1	yes	no	2	0.00069127	80.596	105570000	51562000	54011000	0	0	51562000	50455000	0	0
GEDSVPDTVHHVVVPVNPK	19	0	2024.03	Q91VR5	Q91VR5	433	451	Ddx1	ATP-dependent RNA helicase DDX1	yes	yes	3	0.029051	25.824	10373000	10373000	0	0	0	10373000	0	0	0
GEEGHDPKEPEQLR	14	1	1619.75	A2AL12;Q8BG05	A2AL12	22	35	Hnrnpa3	Heterogeneous nuclear ribonucleoprotein A3	yes	no	2;3;4	0.0013275	59.542	61648000	0	22990000	19220000	19438000	0	21476000	9203800	9612100
GEEILSGAQR	10	0	1058.54	Q922B2	Q922B2	422	431	Dars	Aspartate--tRNA ligase, cytoplasmic	yes	yes	2	0.028326	55.549	24415000	10828000	13587000	0	0	10828000	12693000	0	0
GEFITTVQQR	10	0	1177.61	A0A5F8MPN8;P14152	A0A5F8MPN8	221	230	Mdh1	Malate dehydrogenase, cytoplasmic	yes	no	2	0.013527	69.812	45359000	45359000	0	0	0	45359000	0	0	0
GEFTIETEGK	10	0	1109.52	Q9CZD3	Q9CZD3	528	537	Gars	Glycine--tRNA ligase	yes	yes	2	0.035501	55.461	19270000	11076000	8194500	0	0	11076000	7655000	0	0
GEGGEFSVDR	10	0	1051.46	Q9CY58;Q3UMP4;A0A0N4SV32;A0A0N4SWH2;A0A0N4SV40	Q9CY58	146	155	Serbp1	Plasminogen activator inhibitor 1 RNA-binding protein	yes	no	2	0.01193	71.451	11804000	5081500	6722900	0	0	5081500	6280300	0	0
GEGGEFSVDRPIIER	15	1	1659.82	Q9CY58;Q3UMP4;A0A0N4SV32;A0A0N4SWH2;A0A0N4SV40	Q9CY58	146	160	Serbp1	Plasminogen activator inhibitor 1 RNA-binding protein	yes	no	2;3	4.3705e-124	198.23	502850000	57197000	70509000	0	375140000	57197000	65867000	0	185510000
GEGGILINSQGER	13	0	1328.67	Q8K2B3	Q8K2B3	313	325	Sdha	Succinate dehydrogenase [ubiquinone] flavoprotein subunit, mitochondrial	yes	yes	2	0.0014402	74.841	423070000	211500000	211570000	0	0	211500000	197640000	0	0
GEGGTTNPHVFPEGSEPK	18	0	1838.84	D3YWF6;Q7TQI3	D3YWF6	209	226	Otub1	Ubiquitin thioesterase OTUB1	yes	no	3	0.022253	28.472	37811000	37811000	0	0	0	37811000	0	0	0
GEGQLSAAER	10	0	1016.49	P58252	P58252	240	249	Eef2	Elongation factor 2	yes	yes	2	0.013952	69.375	31049000	15314000	15735000	0	0	15314000	14699000	0	0
GEHGFIGCR	9	0	1031.46	Q61553;A0A0G2JDU7;F7BDR1	Q61553	390	398	Fscn1	Fascin	yes	no	2	0.029967	84.097	22023000	11674000	10350000	0	0	11674000	9668500	0	0
GEHPGLSIGDVAK	13	0	1278.66	A0A0J9YUZ4;P63158;A0A0J9YUD8	A0A0J9YUZ4	129	141	Hmgb1	High mobility group protein B1	yes	no	2;3	0.00055588	53.448	89624000	67626000	21998000	0	0	67626000	20550000	0	0
GEIEHHCSGLHR	12	0	1430.65	F8WHM5;Q61543	F8WHM5	431	442	Glg1	Golgi apparatus protein 1	yes	no	4	0.0020777	53.967	48275000	0	0	27337000	20938000	0	0	13091000	10354000
GELASYDMQLR	11	0	1281.6	Q91VA7;A0A668KL51	Q91VA7	122	132	Idh3b	Isocitrate dehydrogenase [NAD] subunit, mitochondrial	yes	no	2	0.0047091	65.347	41720000	20404000	21316000	0	0	20404000	19913000	0	0
GEMDTFPTFK	10	0	1171.52	P97450	P97450	85	94	Atp5j	ATP synthase-coupling factor 6, mitochondrial	yes	yes	2	0.025813	57.859	40556000	40556000	0	0	0	40556000	0	0	0
GENLVSMTVEGPPPK	15	0	1553.78	P27048;P63163	P27048	74	88	Snrpb;Snrpn	Small nuclear ribonucleoprotein-associated protein B;Small nuclear ribonucleoprotein-associated protein N	yes	no	2	0.00071716	95.401	273550000	0	0	111180000	162370000	0	0	53237000	80292000
GENLVSMTVEGPPPKDTGIAR	21	1	2167.09	P27048;P63163	P27048	74	94	Snrpb;Snrpn	Small nuclear ribonucleoprotein-associated protein B;Small nuclear ribonucleoprotein-associated protein N	yes	no	3	2.0309e-07	80.224	44256000	0	0	44256000	0	0	0	21192000	0
GESPVDYDGGR	11	0	1150.49	F7DBQ0;Q3TML0;Q922R8	F7DBQ0	246	256	Pdia6	Protein disulfide-isomerase A6	yes	no	2	0.017718	52.579	119810000	54339000	65469000	0	0	54339000	61159000	0	0
GETAVPGAPETLR	13	0	1296.67	Q8CHP8	Q8CHP8	42	54	Pgp	Phosphoglycolate phosphatase	yes	yes	2	0.0017088	70.1	70722000	40514000	30208000	0	0	40514000	28220000	0	0
GFAFVQYVNER	11	0	1328.65	Q9Z204;A0A2I3BRM6;A0A2I3BQH3	Q9Z204	51	61	Hnrnpc	Heterogeneous nuclear ribonucleoproteins C1/C2	yes	no	2	5.2264e-05	117.89	295230000	98870000	0	86751000	109610000	98870000	0	41541000	54204000
GFAFVTFDDHDSVDK	15	0	1698.75	Q5EBP8;P49312	Q5EBP8	147	161	Hnrnpa1	Heterogeneous nuclear ribonucleoprotein A1;Heterogeneous nuclear ribonucleoprotein A1, N-terminally processed	yes	no	2;3	0.00012895	102.28	3286300000	53932000	132930000	1369000000	1730400000	53932000	124180000	655570000	855660000
GFAFVTFDDHDSVDKIVIQK	20	1	2280.14	Q5EBP8;P49312	Q5EBP8	147	166	Hnrnpa1	Heterogeneous nuclear ribonucleoprotein A1;Heterogeneous nuclear ribonucleoprotein A1, N-terminally processed	yes	no	3	1.0907e-05	87.16	235780000	0	0	0	235780000	0	0	0	116590000
GFAFVTFDDHDTVDK	15	0	1712.77	A2AL12;Q8BG05	A2AL12	168	182	Hnrnpa3	Heterogeneous nuclear ribonucleoprotein A3	yes	no	2;3	0.00012895	99.522	2483000000	59763000	52131000	1056700000	1314400000	59763000	48699000	506000000	649990000
GFAFVTFDDHDTVDKIVVQK	20	1	2280.14	A2AL12;Q8BG05	A2AL12	168	187	Hnrnpa3	Heterogeneous nuclear ribonucleoprotein A3	yes	no	3	0.027926	39.237	149880000	0	0	149880000	0	0	0	71770000	0
GFAFVTFESPADAK	14	0	1485.71	A0A2I3BRL8;Q91VM5	A0A2I3BRL8	50	63	Rbmxl1	RNA binding motif protein, X-linked-like-1	no	no	2	0.0015184	66.595	235860000	106690000	129170000	0	0	106690000	120670000	0	0
GFAYIEFSDKESVR	14	1	1646.79	G3UY42;Q8CCS6;D3YUB9;D3Z055;G3UWS5;D3Z5F7	G3UY42	210	223	Pabpn1;Gm20521	Polyadenylate-binding protein 2	yes	no	2;3	0.0011938	57.136	43698000	0	0	43698000	0	0	0	20925000	0
GFCFITFKEEEPVKK	15	2	1857.93	Q60668;F6ZV59;G5E8G0;G3X9W0;F6SHF3	Q60668	224	238	Hnrnpd	Heterogeneous nuclear ribonucleoprotein D0	yes	no	3;4	0.00047337	48.823	219720000	97850000	121870000	0	0	97850000	113850000	0	0
GFCFITYTDEEPVKK	15	1	1832.87	F6VQH5;D3YTQ3;Q9Z130	F6VQH5	178	192	Hnrnpdl	Heterogeneous nuclear ribonucleoprotein D-like	yes	no	3	0.0020443	47.201	195420000	36566000	0	0	158860000	36566000	0	0	78555000
GFCFLEYEDHK	11	0	1443.61	G3UZI2;A0A0R4J259;G3V018;Q7TMK9;G3UZ48;Q8VHM5;F7B5B5	G3UZI2	287	297	Syncrip;Hnrnpr	Heterogeneous nuclear ribonucleoprotein Q	no	no	2;3	0.00053247	101.64	281710000	15276000	34871000	176580000	54989000	15276000	32575000	84555000	27192000
GFCLPPHCSR	10	0	1229.54	Q04447	Q04447	139	148	Ckb	Creatine kinase B-type	yes	yes	3	0.025889	42.001	75551000	0	0	41539000	34012000	0	0	19892000	16819000
GFDILGIKPVQR	12	1	1341.78	Q9D0I9	Q9D0I9	648	659	Rars	Arginine--tRNA ligase, cytoplasmic	yes	yes	3	0.039273	33.761	4560600	0	4560600	0	0	0	4260300	0	0
GFDQTINLILDESHER	16	0	1885.92	A0A0N4SUZ3;Q6ZWM4	A0A0N4SUZ3	33	48	Lsm8	U6 snRNA-associated Sm-like protein LSm8	yes	no	3	0.00090962	51.606	200090000	0	0	107380000	92708000	0	0	51420000	45844000
GFESPSDNSSAVLLQWHEK	19	0	2130	Q9CPW4	Q9CPW4	113	131	Arpc5	Actin-related protein 2/3 complex subunit 5	yes	yes	3	0.00024155	48.477	216170000	0	0	108110000	108060000	0	0	51769000	53437000
GFEVVYMTEPIDEYCVQQLK	20	0	2447.14	P11499	P11499	507	526	Hsp90ab1	Heat shock protein HSP 90-beta	yes	yes	2	0.00054054	44.616	355080000	0	0	170160000	184920000	0	0	81482000	91445000
GFGFILFK	8	0	927.522	Q80XR6;Q20BD0;Q99020	Q80XR6	117	124	Hnrnpab	Heterogeneous nuclear ribonucleoprotein A/B	yes	no	2	0.039325	75.311	67893000	0	0	67893000	0	0	0	32511000	0
GFGFITFEDEQSVDQAVNMHFHDIMGK	27	0	3098.39	Q3UGB5;Q9JII5	Q3UGB5	154	180	Dazap1	DAZ-associated protein 1	yes	no	4	1.409e-10	54.658	129820000	0	0	70006000	59817000	0	0	33523000	29580000
GFGFITFTNPEHASDAMR	18	0	1996.91	O89086;Q8BG13;S4R2M6	O89086	48	65	Rbm3	RNA-binding protein 3	yes	no	2;3	8.6091e-21	134.08	1784200000	119010000	122610000	759310000	783300000	119010000	114540000	363600000	387340000
GFGFVCFSSPEEATK	15	0	1661.74	P29341;Q9D4E6;Q62029;Q91YZ8;A3KFU5;A3KFU8;Q6PHQ9;A2A5N3	P29341	334	348	Pabpc1;Pabpc6;Pabpc2;Pabpc4;Pabpc1l	Polyadenylate-binding protein 1;Polyadenylate-binding protein	yes	no	2	0.0011197	90.653	191390000	35383000	0	83665000	72339000	35383000	0	40064000	35772000
GFGFVDFNSEEDAK	14	0	1560.67	P09405	P09405	608	621	Ncl	Nucleolin	yes	yes	2	0.0010433	93.058	546550000	0	0	270250000	276300000	0	0	129410000	136630000
GFGFVSFER	9	0	1044.5	P29341;Q9D4E6;Q62029	P29341	232	240	Pabpc1;Pabpc6;Pabpc2	Polyadenylate-binding protein 1;Polyadenylate-binding protein	yes	no	2	1.9442e-21	178.08	76253000	0	10117000	34755000	31381000	0	9450600	16643000	15518000
GFGFVTFDDHDPVDK	15	0	1694.76	O88569;A0A0N4SUM2	O88569	154	168	Hnrnpa2b1	Heterogeneous nuclear ribonucleoproteins A2/B1	yes	no	2;3	0.00030097	101.93	3942300000	278830000	648600000	1526200000	1488700000	278830000	605900000	730820000	736150000
GFGFVTFDDHDPVDKIVLQK	20	1	2276.15	O88569;A0A0N4SUM2	O88569	154	173	Hnrnpa2b1	Heterogeneous nuclear ribonucleoproteins A2/B1	yes	no	3;4	9.9529e-10	120.24	908150000	0	0	445120000	463030000	0	0	213150000	228970000
GFGFVTFENIDDAK	14	0	1558.73	P60824;K4DI65;D3YU80	P60824	48	61	Cirbp	Cold-inducible RNA-binding protein	yes	no	2	0.00086191	106.29	241880000	0	0	241880000	0	0	0	115830000	0
GFGFVTFENIDDAKDAMMAMNGK	23	1	2508.11	P60824;K4DI65;D3YU80	P60824	48	70	Cirbp	Cold-inducible RNA-binding protein	yes	no	3	6.91e-08	73.21	141120000	0	0	70794000	70330000	0	0	33900000	34778000
GFGFVTFSSMAEVDAAMAARPHSIDGR	27	1	2826.32	O88569	O88569	63	89	Hnrnpa2b1	Heterogeneous nuclear ribonucleoproteins A2/B1	yes	yes	3;4	5.4329e-12	84.404	775750000	69017000	0	349340000	357400000	69017000	0	167280000	176730000
GFGFVTYATVEEVDAAMNAR	20	0	2147	Q5EBP8;P49312	Q5EBP8	56	75	Hnrnpa1	Heterogeneous nuclear ribonucleoprotein A1;Heterogeneous nuclear ribonucleoprotein A1, N-terminally processed	yes	no	2;3	4.8418e-06	69.081	248350000	0	0	136100000	112250000	0	0	65173000	55507000
GFGFVTYATVEEVDAAMNARPHK	23	1	2509.21	Q5EBP8;P49312	Q5EBP8	56	78	Hnrnpa1	Heterogeneous nuclear ribonucleoprotein A1;Heterogeneous nuclear ribonucleoprotein A1, N-terminally processed	yes	no	3;4	4.0967e-10	107.45	469650000	18212000	0	232450000	218990000	18212000	0	111310000	108290000
GFGFVYFQSHDAADK	15	0	1687.76	Q9CX86	Q9CX86	140	154	Hnrnpa0	Heterogeneous nuclear ribonucleoprotein A0	yes	yes	2;3	0.00055417	99.215	367210000	76430000	0	126040000	164740000	76430000	0	60355000	81466000
GFGGIGGILR	10	0	945.54	Q8BWY3	Q8BWY3	405	414	Etf1	Eukaryotic peptide chain release factor subunit 1	yes	yes	2	0.0042504	91.906	12087000	5109700	6977600	0	0	5109700	6518200	0	0
GFGYGQGAGALVHAQ	15	0	1431.69	P97314	P97314	179	193	Csrp2	Cysteine and glycine-rich protein 2	yes	yes	2	0.0033394	53.683	113820000	54446000	59370000	0	0	54446000	55461000	0	0
GFKDQIYDIFQK	12	1	1500.76	P60843	P60843	191	202	Eif4a1	Eukaryotic initiation factor 4A-I	yes	yes	2;3	0.0011553	104.05	174190000	6027900	5670500	76764000	85725000	6027900	5297100	36759000	42391000
GFPTIYFSPANK	12	0	1340.68	P27773	P27773	449	460	Pdia3	Protein disulfide-isomerase A3	yes	yes	2	0.031964	42.336	80415000	0	0	44196000	36219000	0	0	21164000	17910000
GFQEVVTPNIFNSR	14	0	1606.81	Q9D0R2	Q9D0R2	367	380	Tars	Threonine--tRNA ligase, cytoplasmic	yes	yes	2	0.0017114	72.652	70733000	0	15190000	31552000	23991000	0	14190000	15109000	11864000
GFQFVSSSLPDICYR	15	0	1774.83	P53996	P53996	42	56	Cnbp	Cellular nucleic acid-binding protein	yes	yes	2	0.00057127	79.693	264790000	0	53447000	93019000	118320000	0	49928000	44543000	58509000
GFSLEELR	8	0	949.487	P47963	P47963	75	82	Rpl13	60S ribosomal protein L13	yes	yes	2	0.0084565	117.17	139230000	45768000	48574000	22926000	21961000	45768000	45376000	10978000	10860000
GFSLSDVPQAEISGEHLR	18	0	1940.96	Q9QZF2	Q9QZF2	43	60	Gpc1	Glypican-1;Secreted glypican-1	yes	yes	3	4.3813e-05	41.348	63823000	0	0	31413000	32410000	0	0	15042000	16027000
GFSVVADTPELQR	13	0	1417.72	A2A6G9;A2A6H0;Q61792;A2A6G6;A2A6G7;A2A6G8;A2A6H1	A2A6G9	61	73	Lasp1	LIM and SH3 domain protein 1	yes	no	2	0.0024302	73.067	348820000	171920000	176900000	0	0	171920000	165250000	0	0
GFVEFAAKPPAR	12	1	1288.69	Q8R326	Q8R326	198	209	Pspc1	Paraspeckle component 1	yes	yes	2;3	0.0054622	55.401	26171000	26171000	0	0	0	26171000	0	0	0
GFVFITFKEEDPVKK	15	2	1782.96	Q80XR6;Q20BD0;Q99020	Q80XR6	201	215	Hnrnpab	Heterogeneous nuclear ribonucleoprotein A/B	yes	no	2;3;4	0.00010388	104.17	1045300000	0	0	495770000	549530000	0	0	237400000	271740000
GFYYLMQELPQER	13	0	1672.79	A0A0R4J083;P51174	A0A0R4J083	280	292	Acadl	Long-chain specific acyl-CoA dehydrogenase, mitochondrial	yes	no	2	0.040402	37.722	13332000	0	13332000	0	0	0	12454000	0	0
GGAAVDPDSGLEHSAHVLEK	20	0	1987.96	Q921K2;P11103	Q921K2	529	548	Parp1	Poly [ADP-ribose] polymerase 1	yes	no	3	0.0014837	38.888	46214000	0	46214000	0	0	0	43171000	0	0
GGAEQFMEETER	12	0	1382.58	P80313;A0A0N4SV00	P80313	376	387	Cct7	T-complex protein 1 subunit eta	yes	no	2	0.0021798	71.349	105800000	0	105800000	0	0	0	98836000	0	0
GGAGVGSMTK	10	0	863.417	Q9CZX8;D3YUT3;D3Z5R8;D3Z722;D3YUG3	Q9CZX8	68	77	Rps19	40S ribosomal protein S19	yes	no	2	0.0030329	96.948	972630000	0	0	440570000	532060000	0	0	210970000	263100000
GGDLFDAITSSTK	13	0	1310.64	A0A0A6YX33;A0A0A6YWI6;A0A0A6YX71;Q6PGN3	A0A0A6YX33	472	484	Dclk2	Serine/threonine-protein kinase DCLK2	yes	no	2	0.01902	50.284	73393000	73393000	0	0	0	73393000	0	0	0
GGDLFDAITSTSK	13	0	1310.64	A0A0G2JGQ6;Q9JLM8;A0A0G2JGH1;Q1EDH1;H7BX36;A0A0G2JE54;Q8CCN4;A0A0G2JEN4	A0A0G2JGQ6	470	482	Dclk1	Serine/threonine-protein kinase DCLK1	yes	no	2	0.0038648	57.019	83555000	0	83555000	0	0	0	78054000	0	0
GGDLMAYDR	9	0	996.433	B2M1R6;P61979;H3BLL4;H3BLP7	B2M1R6	293	301	Hnrnpk	Heterogeneous nuclear ribonucleoprotein K	yes	no	2	0.00029313	126.52	86814000	12529000	13260000	35694000	25331000	12529000	12387000	17092000	12526000
GGDLMAYDRR	10	1	1152.53	B2M1R6;P61979;H3BLL4;H3BLP7	B2M1R6	293	302	Hnrnpk	Heterogeneous nuclear ribonucleoprotein K	yes	no	3	0.0029582	81.525	529260000	0	41475000	220520000	267270000	0	38745000	105600000	132160000
GGDPALIR	8	0	797.44	Q8C483;P26638;A2AFS0;A2AFS1	Q8C483	13	20	Sars	Serine--tRNA ligase, cytoplasmic	yes	no	2	0.034041	63.563	0	0	0	0	0	0	0	0	0
GGDVSVCEWYR	11	0	1326.57	P56391;A0A140LIU3	P56391	48	58	Cox6b1	Cytochrome c oxidase subunit 6B1	yes	no	2	0.0014283	85.731	1215800000	450860000	493300000	112080000	159580000	450860000	460830000	53672000	78912000
GGFCNFMHLKPISR	14	1	1662.81	Q9D883;G3UW94;A0A494B947	Q9D883	166	179	U2af1	Splicing factor U2AF 35 kDa subunit	yes	no	2;3;4	3.5064e-06	95.264	157940000	0	0	51963000	105970000	0	0	24883000	52403000
GGGALLGDR	9	0	814.43	Q8CG16;Q3UZ09	Q8CG16	486	494	C1ra;C1rl	Complement C1r-A subcomponent;Complement C1r-A subcomponent heavy chain;Complement C1r-A subcomponent light chain;Complement C1r subcomponent-like protein	yes	no	2	0.041634	74.255	76554000	34426000	42128000	0	0	34426000	39355000	0	0
GGGGNFGPGPGSNFR	15	0	1376.62	O88569	O88569	214	228	Hnrnpa2b1	Heterogeneous nuclear ribonucleoproteins A2/B1	yes	yes	2	0.0010612	76.332	1366000000	785270000	0	0	580700000	785270000	0	0	287160000
GGGHVAQIYAIR	12	0	1240.67	P14131	P14131	74	85	Rps16	40S ribosomal protein S16	yes	yes	2;3	0.00026296	90.657	808910000	74111000	58192000	369290000	307320000	74111000	54361000	176840000	151970000
GGGPVAVAPSQPR	13	0	1191.64	A0A0R3P9D0;Q7TPB0	A0A0R3P9D0	524	536	Lppr3	Lipid phosphate phosphatase-related protein type 3	yes	no	2	0.011295	60.518	12912000	12912000	0	0	0	12912000	0	0	0
GGGQIIPTAR	10	0	968.54	P58252;G3UZ34;A2AH85;O08810;G3UXK8	P58252	717	726	Eef2;Eftud2	Elongation factor 2;116 kDa U5 small nuclear ribonucleoprotein component	no	no	2	0.020423	74.301	94314000	0	0	50816000	43499000	0	0	24334000	21510000
GGHPPAIQSLINLLADNR	18	0	1885.02	B7ZC24;Q91W39;B7ZC23	B7ZC24	336	353	Ncoa5	Nuclear receptor coactivator 5	yes	no	3	0.01706	23.1	12582000	0	0	12582000	0	0	0	6025000	0
GGIVGMTLPIAR	12	0	1183.67	Q99N15;A2AFQ2	Q99N15	173	184	Hsd17b10		yes	no	2	0.02161	45.368	39978000	16307000	23671000	0	0	16307000	22113000	0	0
GGKPEPPAMPQPVPTA	16	1	1572.8	P62908	P62908	228	243	Rps3	40S ribosomal protein S3	yes	yes	2	0.0038106	53.252	168330000	0	0	0	168330000	0	0	0	83237000
GGNFGFGDSR	10	0	1012.44	O88569	O88569	204	213	Hnrnpa2b1	Heterogeneous nuclear ribonucleoproteins A2/B1	yes	yes	2	0.0032863	96.027	219750000	98594000	81631000	0	39524000	98594000	76257000	0	19545000
GGNFGGR	7	0	663.309	A2AL12;Q8BG05;A2AL13;Q5EBP8;P49312	A2AL12	240	246	Hnrnpa3;Hnrnpa1	Heterogeneous nuclear ribonucleoprotein A3;Heterogeneous nuclear ribonucleoprotein A1;Heterogeneous nuclear ribonucleoprotein A1, N-terminally processed	no	no	2	0.024596	120.76	20993000	20993000	0	0	0	20993000	0	0	0
GGPGGPGGPGGPMGR	15	0	1206.56	Q5SUT0;Q5SUS9;Q61545	Q5SUT0	434	448	Ewsr1	RNA-binding protein EWS	yes	no	2	2.6637e-08	122.26	245700000	0	0	129790000	115910000	0	0	62149000	57319000
GGPGPTLSFVGK	12	0	1115.6	Q9D735	Q9D735	104	115		Uncharacterized protein C19orf43 homolog	yes	yes	2	0.012663	51.445	5674700	5674700	0	0	0	5674700	0	0	0
GGPNIITLADIVK	13	0	1309.76	Q60737	Q60737	90	102	Csnk2a1	Casein kinase II subunit alpha	yes	yes	2	0.00067252	57.348	0	0	0	0	0	0	0	0	0
GGPNIITLADIVKDPVSR	18	1	1864.04	Q60737	Q60737	90	107	Csnk2a1	Casein kinase II subunit alpha	yes	yes	3	9.5298e-05	89.107	167230000	28366000	23876000	114990000	0	28366000	22304000	55062000	0
GGPPFAFVEFEDPR	14	0	1563.74	H7BX95;Q6PDM2	H7BX95	52	65	Srsf1	Serine/arginine-rich splicing factor 1	yes	no	2	0.0070283	49.715	36825000	0	0	0	36825000	0	0	0	18210000
GGQVQIVTK	9	0	928.534	A0A668KLC6;P20357;Q80X35;Q80ZL4;G3UZJ2	A0A668KLC6	1851	1859	Map2	Microtubule-associated protein 2;Microtubule-associated protein	yes	no	2	0.031904	67.464	125350000	0	0	125350000	0	0	0	60026000	0
GGSDGYGSGR	10	0	911.373	O88569	O88569	229	238	Hnrnpa2b1	Heterogeneous nuclear ribonucleoproteins A2/B1	yes	yes	2	0.0046091	88.294	14053000	0	14053000	0	0	0	13127000	0	0
GGSGSHNWGTVKDELTESPK	20	1	2084.98	Q9CY58;Q3UMP4	Q9CY58	217	236	Serbp1	Plasminogen activator inhibitor 1 RNA-binding protein	yes	no	2	0.04153	37.954	0	0	0	0	0	0	0	0	0
GGWGISPR	8	0	828.424	P62715;P63330	P63330	207	214	Ppp2cb;Ppp2ca	Serine/threonine-protein phosphatase 2A catalytic subunit beta isoform;Serine/threonine-protein phosphatase 2A catalytic subunit alpha isoform	no	no	2	0.038014	79.116	74960000	0	0	0	74960000	0	0	0	37068000
GGYFDEFGIIR	11	0	1272.61	Q00612;A3KG36;G3UWD6;P97324	Q00612	247	257	G6pdx;G6pd2	Glucose-6-phosphate 1-dehydrogenase X;Glucose-6-phosphate 1-dehydrogenase;Glucose-6-phosphate 1-dehydrogenase 2	yes	no	2	0.026548	56.729	24219000	0	11334000	0	12885000	0	10588000	0	6371500
GHAVGDIPGVR	11	0	1076.57	P62267	P62267	109	119	Rps23	40S ribosomal protein S23	yes	yes	2	0.0066202	66.27	45933000	0	15399000	15455000	15080000	0	14385000	7400700	7456900
GHAVNLLDVPVPVAR	15	0	1555.88	E9PUD2;Q8K1M6;A0A2U3TZ67	E9PUD2	596	610	Dnm1l	Dynamin-1-like protein	yes	no	2	0.016768	47.844	24183000	0	0	24183000	0	0	0	11580000	0
GHDGGHSHGGDMSNRPVCR	19	1	2031.85	Q80W00	Q80W00	843	861	Ppp1r10	Serine/threonine-protein phosphatase 1 regulatory subunit 10	yes	yes	4	0.021114	26.146	3454700	0	3454700	0	0	0	3227200	0	0
GHLENNPALEK	11	0	1220.61	P14869;D3YVM5;S4R1N1	P14869	67	77	Rplp0	60S acidic ribosomal protein P0	yes	no	2	5.1252e-05	127.51	365280000	0	84075000	139040000	142170000	0	78539000	66581000	70302000
GHLETPIWIER	11	0	1349.71	Q8BHN3	Q8BHN3	881	891	Ganab	Neutral alpha-glucosidase AB	yes	yes	3	2.7733e-10	98.04	0	0	0	0	0	0	0	0	0
GHPEFSTNR	9	0	1043.48	Q3U4W8;P56399	Q3U4W8	424	432	Usp5	Ubiquitin carboxyl-terminal hydrolase;Ubiquitin carboxyl-terminal hydrolase 5	yes	no	2	0.00051375	119.29	0	0	0	0	0	0	0	0	0
GHQQLYWSHPR	11	0	1407.68	P62274	P62274	2	12	Rps29	40S ribosomal protein S29	yes	yes	2;3;4	2.4294e-57	228.05	2640300000	81217000	33158000	1162700000	1363200000	81217000	30975000	556770000	674120000
GHSCYRPR	8	1	1031.47	P62754	P62754	80	87	Rps6	40S ribosomal protein S6	yes	yes	2;3	0.012596	114.19	112130000	69276000	42855000	0	0	69276000	40033000	0	0
GHTDSVQDISFDHSGK	16	0	1728.77	P63005	P63005	148	163	Pafah1b1	Platelet-activating factor acetylhydrolase IB subunit alpha	yes	yes	3	0.014652	32.341	42103000	18635000	23468000	0	0	18635000	21923000	0	0
GHTGIGELAAALNEFDNK	18	0	1855.91	E0CXB9;Q61301;Q8BS72	E0CXB9	282	299	Ctnna2	Catenin alpha-2	yes	no	2;3	2.173e-05	55.33	83447000	0	0	42305000	41142000	0	0	20258000	20345000
GHVDVLAPTVQELAALEK	18	0	1889.03	Q91VR5	Q91VR5	703	720	Ddx1	ATP-dependent RNA helicase DDX1	yes	yes	3	4.2326e-05	58.246	37820000	0	37820000	0	0	0	35330000	0	0
GHVFEESQVAGTPMFVVK	18	0	1960.97	P58252	P58252	768	785	Eef2	Elongation factor 2	yes	yes	2;3	5.6471e-06	97.911	1431400000	289570000	295510000	408900000	437400000	289570000	276050000	195810000	216300000
GHYAYDCHR	9	0	1177.47	A0A3Q4EH04;A0A3Q4L335;A0A3Q4L393;Q8BL97;A0A3Q4EGP0	A0A3Q4EH04	113	121	Srsf7	Serine/arginine-rich splicing factor 7	yes	no	2;3	0.013904	85.212	55882000	13676000	17280000	0	24926000	13676000	16142000	0	12326000
GHYTEGAELVDAVLDVVR	18	0	1941.98	Q9D6F9	Q9D6F9	104	121	Tubb4a	Tubulin beta-4A chain	yes	yes	2;3	6.5094e-09	96.208	253540000	0	0	143530000	110010000	0	0	68730000	54400000
GHYTEGAELVDAVLDVVRK	19	1	2070.07	Q9D6F9	Q9D6F9	104	122	Tubb4a	Tubulin beta-4A chain	yes	yes	3	0.036662	21.27	25594000	0	0	0	25594000	0	0	0	12656000
GHYTEGAELVDSVLDVVR	18	0	1957.97	Q9ERD7;P68372;G3UZR1;P99024;Q7TMM9;Q922F4;Q9CWF2	P68372	104	121	Tubb3;Tubb4b;Tubb5;Tubb2a;Tubb6;Tubb2b	Tubulin beta-3 chain;Tubulin beta-4B chain;Tubulin beta-5 chain;Tubulin beta-2A chain;Tubulin beta-6 chain;Tubulin beta-2B chain	no	no	2;3;4	1.194e-53	148.18	12216000000	122420000	153820000	6020400000	5919800000	122420000	143700000	2882900000	2927300000
GHYTEGAELVDSVLDVVRK	19	1	2086.07	Q9ERD7;P68372;G3UZR1;P99024;Q7TMM9;Q922F4;Q9CWF2	P68372	104	122	Tubb3;Tubb4b;Tubb5;Tubb2a;Tubb6;Tubb2b	Tubulin beta-3 chain;Tubulin beta-4B chain;Tubulin beta-5 chain;Tubulin beta-2A chain;Tubulin beta-6 chain;Tubulin beta-2B chain	no	no	3;4	3.3636e-30	146.67	2964100000	8000100	5857100	1410500000	1539800000	8000100	5471500	675430000	761410000
GHYTIGK	7	0	774.402	P05213;A0A0A0MQA5;P68368;A0A2R8VHF3;A0A087WRB4;A0A087WQS4;P68369;P05214	P68369	106	112	Tuba1b;Tuba4a;Tuba1a;Tuba3a	Tubulin alpha-1B chain;Tubulin alpha-4A chain;Tubulin alpha-1A chain;Tubulin alpha-3 chain	no	no	2	0.028399	114.19	1254500000	1254500000	0	0	0	1254500000	0	0	0
GHYTIGKEIIDLVLDR	16	1	1841	P05213;A0A2R8VHF3;P68369	P68369	106	121	Tuba1b;Tuba1a	Tubulin alpha-1B chain;Tubulin alpha-1A chain	no	no	3	0.00031933	70.529	50221000	0	0	19945000	30277000	0	0	9550600	14972000
GIAGLGDVAEVR	12	0	1155.62	Q8CI94	Q8CI94	18	29	Pygb	Glycogen phosphorylase, brain form	yes	yes	2	0.0011865	79.974	24536000	24536000	0	0	0	24536000	0	0	0
GIAQMLEK	8	0	888.474	P67871;G3UXG7;G3UZA4;G3UZJ5;G3UZX4	P67871	93	100	Csnk2b	Casein kinase II subunit beta	yes	no	2	0.038723	77.058	7202200	0	7202200	0	0	0	6728000	0	0
GIDPFSLDALAK	12	0	1245.66	P80317;A0A571BEL9	P80317	296	307	Cct6a	T-complex protein 1 subunit zeta	yes	no	2	0.0010161	81.338	568190000	119930000	125560000	169510000	153190000	119930000	117300000	81169000	75753000
GIFEPFGR	8	0	921.471	Q8VH51;E9Q8F0;F7AA45	Q8VH51	268	275	Rbm39	RNA-binding protein 39	yes	no	2	0.033539	90.986	137900000	0	0	70821000	67075000	0	0	33913000	33169000
GIHPTIISESFQK	13	0	1455.77	P80315;G5E839	P80315	127	139	Cct4	T-complex protein 1 subunit delta	yes	no	2;3	6.0474e-05	89.301	139200000	27445000	111750000	0	0	27445000	104400000	0	0
GILAADESTGSIAK	14	0	1331.69	A6ZI44;P05064;D3YWI1;D3Z510;A0A0U1RPN8;D3YV98;A0A0U1RPT5;A6ZI47	A6ZI44	83	96	Aldoa;Aldoart2	Fructose-bisphosphate aldolase;Fructose-bisphosphate aldolase A	yes	no	2	0.00049878	81.017	243320000	112690000	130640000	0	0	112690000	122040000	0	0
GILAADESVGSMAK	14	0	1347.67	P05063	P05063	29	42	Aldoc	Fructose-bisphosphate aldolase C	yes	yes	2	0.018779	41.283	129350000	0	33652000	0	95695000	0	31437000	0	47321000
GILLYGPPGCGK	12	0	1230.64	P46460	P46460	255	266	Nsf	Vesicle-fusing ATPase	yes	yes	2	0.015648	49.418	28074000	13738000	14336000	0	0	13738000	13392000	0	0
GIPHLVTHDAR	11	0	1214.65	P62702;V9GWY0	P62702	135	145	Rps4x;Gm15013	40S ribosomal protein S4, X isoform;40S ribosomal protein S4	yes	no	2;3;4	0.00065371	67.385	1122600000	82123000	196450000	730350000	113680000	82123000	183520000	349730000	56217000
GIPNVLR	7	0	767.465	Q9CQ69	Q9CQ69	34	40	Uqcrq	Cytochrome b-c1 complex subunit 8	yes	yes	2	0.028611	113.82	60524000	0	0	60524000	0	0	0	28983000	0
GIQEEMEALVK	11	0	1245.63	O08553	O08553	147	157	Dpysl2	Dihydropyrimidinase-related protein 2	yes	yes	2	0.00085114	113.62	452500000	0	0	227390000	225110000	0	0	108890000	111310000
GIRPAINVGLSVSR	14	1	1437.84	Q03265;D3Z6F5	Q03265	403	416	Atp5a1	ATP synthase subunit alpha, mitochondrial;ATP synthase subunit alpha	yes	no	2;3	2.6689e-05	113.47	457330000	0	0	202560000	254770000	0	0	96998000	125990000
GISDLAQHYLMR	12	0	1402.7	P80318;E9Q133;Q3U0I3;F6Q609	P80318	295	306	Cct3	T-complex protein 1 subunit gamma	yes	no	2;3	1.1552e-05	100.72	154010000	18297000	48853000	41350000	45509000	18297000	45637000	19801000	22504000
GISEETTTGVHNLYK	15	0	1647.81	P50247	P50247	152	166	Ahcy	Adenosylhomocysteinase	yes	yes	3	0.021788	30.543	13190000	13190000	0	0	0	13190000	0	0	0
GISHVIVDEIHER	13	0	1502.78	A0A087WPL5;E9QNN1;O70133;Q3UR42	A0A087WPL5	506	518	Dhx9	ATP-dependent RNA helicase A	yes	no	2;3;4	0.00057723	54.276	109070000	59400000	49665000	0	0	59400000	46395000	0	0
GISLNMEQWSQLK	13	0	1532.77	P11031	P11031	102	114	Sub1	Activated RNA polymerase II transcriptional coactivator p15	yes	yes	2	0.0010957	99.653	629540000	0	0	629540000	0	0	0	301460000	0
GISPVPINLR	10	0	1064.63	A0A0J9YUE9;A0A0J9YUN4;P39053	A0A0J9YUE9	114	123	Dnm1	Dynamin-1	no	no	2	0.0051145	83.206	12332000	5442700	6889200	0	0	5442700	6435700	0	0
GITAFIVEK	9	0	976.559	Q9JHI5	Q9JHI5	222	230	Ivd	Isovaleryl-CoA dehydrogenase, mitochondrial	yes	yes	2	0.012771	85.064	460240000	0	0	245490000	214750000	0	0	117550000	106190000
GITINAAHVEYSTAAR	16	0	1672.85	Q8BFR5	Q8BFR5	105	120	Tufm	Elongation factor Tu, mitochondrial	yes	yes	3	0.00030302	57.288	18306000	10608000	7698100	0	0	10608000	7191300	0	0
GITWGEDTLMEYLENPKK	18	1	2123.02	P62897	P62897	57	74	Cycs	Cytochrome c, somatic	yes	yes	3	9.901e-05	57.499	525810000	0	0	272780000	253040000	0	0	130620000	125130000
GIVDQSQQAYQEAFEISK	18	0	2039.98	P63101;A0A2I3BQ03	P63101	140	157	Ywhaz	14-3-3 protein zeta/delta	yes	no	2;3	9.0892e-09	119.39	911970000	0	0	434070000	477900000	0	0	207860000	236320000
GIVDQSQQAYQEAFEISKK	19	1	2168.07	P63101;A0A2I3BQ03	P63101	140	158	Ywhaz	14-3-3 protein zeta/delta	yes	no	2;3	0.00048326	70.412	596760000	0	0	0	596760000	0	0	0	295100000
GIVEFASK	8	0	849.46	Q8VIJ6	Q8VIJ6	406	413	Sfpq	Splicing factor, proline- and glutamine-rich	yes	yes	1;2	0.015855	84.097	54731000	0	54731000	0	0	0	51128000	0	0
GIVEFASKPAAR	12	1	1244.69	Q8VIJ6	Q8VIJ6	406	417	Sfpq	Splicing factor, proline- and glutamine-rich	yes	yes	3	0.00055358	69.815	187280000	0	0	83172000	104110000	0	0	39827000	51481000
GIVEFSGKPAAR	12	1	1230.67	Q99K48	Q99K48	193	204	Nono	Non-POU domain-containing octamer-binding protein	yes	yes	2;3	0.00077066	107.15	279440000	60005000	0	111410000	108020000	60005000	0	53350000	53417000
GIVVLGINR	9	0	939.587	A0A0R4J023;Q9JLZ3;E9Q6L3;A0A0R4J1L8;E9QMT1	A0A0R4J023	63	71	Auh	Methylglutaconyl-CoA hydratase, mitochondrial	yes	no	2	0.010409	108.24	10114000	5213100	4901300	0	0	5213100	4578600	0	0
GIVYAISPDR	10	0	1089.58	A0A0G2JGQ6;Q9JLM8;Q80VB6;A0A0G2JGR9	A0A0G2JGQ6	71	80	Dclk1	Serine/threonine-protein kinase DCLK1	yes	no	2	0.0017683	101.54	39322000	19810000	19513000	0	0	19810000	18228000	0	0
GIYAYGFEKPSAIQQR	16	1	1826.93	P60843;Q8BTU6;P10630;A0A338P6X5;D6RJ60;D6RJ11;Q91VC3;A2AFK7;A0A0N4SVP8;E9PV04;A0A0N4SVM5	P60843	46	61	Eif4a1;Eif4a2;Eif4a3;Gm8994	Eukaryotic initiation factor 4A-I;Eukaryotic initiation factor 4A-II;Eukaryotic initiation factor 4A-II, N-terminally processed;Eukaryotic initiation factor 4A-III;Eukaryotic initiation factor 4A-III, N-terminally processed	no	no	2;3	8.1781e-05	82.529	473960000	117930000	137710000	0	218330000	117930000	128640000	0	107960000
GKFEDMAK	8	1	924.438	A0A0J9YUZ4;P63158;A0A0J9YUD8;D3YZ18;D3YVC6	A0A0J9YUZ4	72	79	Hmgb1	High mobility group protein B1	yes	no	2	0.03047	98.458	98802000	0	0	98802000	0	0	0	47312000	0
GKLEEQKPER	10	2	1212.65	P63028;D3YU75	P63028	101	110	Tpt1	Translationally-controlled tumor protein	yes	no	3	0.0098147	84.17	34141000	0	0	21246000	12895000	0	0	10174000	6376500
GKVEEVELPVEK	12	1	1354.73	A0A171KXD3;Q9JIF0;A0A140LJF4;A0A140LJ70;A0A140LHS4;A0A140LI33;Q6PAK3	A0A171KXD3	91	102	Prmt1;Prmt8	Protein arginine N-methyltransferase 1;Protein arginine N-methyltransferase 8	yes	no	2;3	0.0032263	67.207	61453000	0	61453000	0	0	0	57407000	0	0
GLAAALLLCQNK	12	0	1270.71	Q9Z315	Q9Z315	643	654	Sart1	U4/U6.U5 tri-snRNP-associated protein 1	yes	yes	2	1.285e-27	170.66	202370000	0	0	91034000	111340000	0	0	43592000	55058000
GLAPDLPEDLYHLIK	15	0	1692.91	Q921R2;P62301	Q921R2	79	93	Rps13	40S ribosomal protein S13	yes	no	2;3	0.00050247	67.234	184330000	0	0	122720000	61610000	0	0	58765000	30466000
GLCAIAQAESLR	12	0	1287.66	P62908;D3YV43;A0A140LI77	P62908	95	106	Rps3	40S ribosomal protein S3	yes	no	2	0.00078076	83.883	1391200000	0	394610000	555030000	441560000	0	368630000	265780000	218350000
GLCGAIHSSVAK	12	0	1198.61	Q8C2Q8;A2AKU9;Q91VR2;A2AKV1;A2AKV2;A2AKV3;A2AKV0	Q8C2Q8	77	88	Atp5c1	ATP synthase subunit gamma;ATP synthase subunit gamma, mitochondrial	yes	no	2;3	0.00082275	57.888	134930000	36114000	0	0	98820000	36114000	0	0	48867000
GLCGMGGPR	9	0	903.405	Q99LD8;O08972	Q99LD8	174	182	Ddah2	N(G),N(G)-dimethylarginine dimethylaminohydrolase 2	yes	no	2	0.00020131	128.38	33486000	17258000	16228000	0	0	17258000	15159000	0	0
GLEILTDMSR	10	0	1133.58	P80315;G5E839	P80315	144	153	Cct4	T-complex protein 1 subunit delta	yes	no	2	0.0086432	76.221	43703000	18831000	24872000	0	0	18831000	23234000	0	0
GLEILTDMSRPVQLSDR	17	1	1929	P80315;G5E839	P80315	144	160	Cct4	T-complex protein 1 subunit delta	yes	no	3	5.9981e-17	111.92	230210000	45329000	37073000	76496000	71312000	45329000	34632000	36631000	35264000
GLEKPPHLAALVLAR	15	1	1583.95	A0A0R4J0B4;Q99KK2;A0A0N4SW65;A0A0N4SWC3	A0A0R4J0B4	36	50	Cmas	N-acylneuraminate cytidylyltransferase	yes	no	2;3;4	0.00080579	59.542	145560000	32826000	34823000	42850000	35062000	32826000	32530000	20519000	17338000
GLESTTLADKDGEIYCK	17	1	1898.89	P97315	P97315	152	168	Csrp1	Cysteine and glycine-rich protein 1	yes	yes	3	0.00028012	68.919	107950000	57377000	50571000	0	0	57377000	47241000	0	0
GLEYLHFMRK	10	1	1292.67	A0A2I3BQE0;Q9JI11;Q9JI10	A0A2I3BQE0	131	140	Stk4;Stk3	Serine/threonine-protein kinase 4;Serine/threonine-protein kinase 4 37kDa subunit;Serine/threonine-protein kinase 4 18kDa subunit;Serine/threonine-protein kinase 3;Serine/threonine-protein kinase 3 36kDa subunit;Serine/threonine-protein kinase 3 20kDa subunit	yes	no	2	0.0075967	51.995	36006000	36006000	0	0	0	36006000	0	0	0
GLFDEYGSK	9	0	1014.47	P08113;F7C312	P08113	396	404	Hsp90b1	Endoplasmin	yes	no	2	0.0049728	107.66	69030000	0	6935000	38275000	23819000	0	6478400	18329000	11779000
GLFIIDAK	8	0	875.512	Q61171;D3Z4A4	Q61171	128	135	Prdx2	Peroxiredoxin-2	yes	no	2	0.038014	79.116	350680000	0	350680000	0	0	0	327590000	0	0
GLFIIDDK	8	0	919.501	P35700;B1AXW5;B1AXW6;B1AZS9;O08807	P35700	129	136	Prdx1;Prdx4	Peroxiredoxin-1;Peroxiredoxin-4	no	no	2	0.036789	82.671	306720000	0	273580000	0	33143000	0	255570000	0	16389000
GLFIIDDKGILR	12	1	1358.79	P35700;B1AXW5;B1AXW6	P35700	129	140	Prdx1	Peroxiredoxin-1	yes	no	3	0.0079967	53.569	7397200	7397200	0	0	0	7397200	0	0	0
GLFQVLAGGTVLQLR	15	0	1570.92	P98086	P98086	196	210	C1qa	Complement C1q subcomponent subunit A	yes	yes	2	0.00021014	82.171	77039000	0	0	39648000	37390000	0	0	18986000	18489000
GLGATLLR	8	0	799.492	A0A0J9YTY6;E9PV90;E9PY45;Q9DB41;Q9D6M3	A0A0J9YTY6	185	192	Slc25a22;Slc25a18	Mitochondrial glutamate carrier 2;Mitochondrial glutamate carrier 1	yes	no	2	0.035788	85.265	15735000	7832200	7902900	0	0	7832200	7382600	0	0
GLGAVILVHAENGDLIAQEQK	21	0	2174.17	P97427;A0A0J9YTX5;Q6P1J1	Q6P1J1	304	324	Crmp1	Dihydropyrimidinase-related protein 1	no	no	3	0.0017402	36.744	219170000	0	0	115570000	103610000	0	0	55339000	51233000
GLGAVILVHAENGDLIAQEQKR	22	1	2330.27	P97427;A0A0J9YTX5;Q6P1J1	Q6P1J1	304	325	Crmp1	Dihydropyrimidinase-related protein 1	no	no	3	0.0011097	41.912	45218000	0	0	0	45218000	0	0	0	22360000
GLGEISAATEFK	12	0	1221.62	P13595;A0A0A6YY91;E9Q589;A0A0A6YWU2;A0A0A6YY47;E9QB01	P13595	584	595	Ncam1	Neural cell adhesion molecule 1	no	no	2	0.00076115	96.89	191840000	191840000	0	0	0	191840000	0	0	0
GLGGILLEDIEEGLPNSQK	19	0	1981.04	Q9D902	Q9D902	163	181	Gtf2e2	General transcription factor IIE subunit 2	yes	yes	3	0.029794	25.586	19562000	0	0	19562000	0	0	0	9367300	0
GLGGLILVNK	10	0	982.618	Q8C0M9	Q8C0M9	278	287	Asrgl1	Isoaspartyl peptidase/L-asparaginase;Isoaspartyl peptidase/L-asparaginase alpha chain;Isoaspartyl peptidase/L-asparaginase beta chain	yes	yes	2	0.016235	67.032	7048700	7048700	0	0	0	7048700	0	0	0
GLGHQVATDALVAMEK	16	0	1638.84	Q99LF4	Q99LF4	264	279	Rtcb	tRNA-splicing ligase RtcB homolog	yes	yes	2;3	0.00018679	100.23	159020000	0	0	92020000	67002000	0	0	44065000	33132000
GLGISVLEMSHR	12	0	1297.68	Q3U6K9;Q99K85	Q3U6K9	31	42	Psat1	Phosphoserine aminotransferase	yes	no	3	0.025508	34.386	9770600	0	9770600	0	0	0	9127300	0	0
GLGLDDALEPR	11	0	1154.59	Q9WTM5;A0A1B0GSR4;A0A1B0GRW3;A0A1B0GT54	Q9WTM5	30	40	Ruvbl2	RuvB-like 2	yes	no	2	0.014464	49.06	0	0	0	0	0	0	0	0	0
GLGLDESGLAK	11	0	1058.56	P60122	P60122	23	33	Ruvbl1	RuvB-like 1	yes	yes	2	0.0056555	72.928	0	0	0	0	0	0	0	0	0
GLGMTLSYLFR	11	0	1256.66	A0A494BAW8;Q8K3J1	A0A494BAW8	20	30	Ndufs8	NADH dehydrogenase [ubiquinone] iron-sulfur protein 8, mitochondrial	yes	no	2	0.0012573	88.948	12148000	0	0	0	12148000	0	0	0	6007200
GLGTDEDSILNLLTSR	16	0	1702.87	A0A0G2JGQ0;P48036	A0A0G2JGQ0	28	43	Anxa5	Annexin A5	yes	no	2	0.0047456	45.077	16693000	0	0	0	16693000	0	0	0	8254600
GLIESALNLGR	11	0	1141.65	A0A0G2JFT8;Q9D394	A0A0G2JFT8	132	142	Rufy3	Protein RUFY3	yes	no	2	0.0018262	78.516	29073000	13585000	15488000	0	0	13585000	14468000	0	0
GLLDDLRNDLDR	12	1	1413.72	Q8BMK4	Q8BMK4	552	563	Ckap4	Cytoskeleton-associated protein 4	yes	yes	2	0.023298	47.706	19973000	0	0	19973000	0	0	0	9564500	0
GLLLYGPPGTGK	12	0	1171.66	D3Z0U5;D6RGM7;D3Z4J2;A0A0G2JFY0;A0A0A0MQ80;Q9D3R6;Q3UMC0	D3Z0U5	28	39	Katnal2;Spata5	Katanin p60 ATPase-containing subunit A-like 2;Spermatogenesis-associated protein 5	yes	no	2	0.001247	79.489	79889000	0	0	46438000	33451000	0	0	22237000	16541000
GLLQSGQIPGR	11	0	1124.63	P57784	P57784	222	232	Snrpa1	U2 small nuclear ribonucleoprotein A	yes	yes	2	0.0020273	88.948	45909000	0	0	25315000	20595000	0	0	12122000	10184000
GLLSSLDHTSIR	12	0	1297.7	Q9D0M3;A0A2R8VHK1	Q9D0M3	100	111	Cyc1	Cytochrome c1, heme protein, mitochondrial	yes	no	2;3	1.289e-20	152.85	240320000	86024000	31361000	66989000	55952000	86024000	29296000	32078000	27668000
GLMAFEHQR	9	0	1087.52	Q8BHN3	Q8BHN3	174	182	Ganab	Neutral alpha-glucosidase AB	yes	yes	2	0.021305	74.255	30222000	0	0	30222000	0	0	0	14472000	0
GLNISAVR	8	0	828.482	Q8BGD9;B2RWE8	Q8BGD9	118	125	Eif4b	Eukaryotic translation initiation factor 4B	yes	no	2	0.037094	81.784	11325000	11325000	0	0	0	11325000	0	0	0
GLPWSCSADEVQR	13	0	1503.68	Q8C2Q7;O35737	Q8C2Q7	17	29	Hnrnph1	Heterogeneous nuclear ribonucleoprotein H;Heterogeneous nuclear ribonucleoprotein H, N-terminally processed	yes	no	2	2.927e-44	174.41	819600000	0	0	410540000	409060000	0	0	196590000	202280000
GLQDVLR	7	0	799.455	P80317;A0A571BEL9;Q61390	P80317	29	35	Cct6a;Cct6b	T-complex protein 1 subunit zeta;T-complex protein 1 subunit zeta-2	yes	no	2	0.01142	133.99	75635000	29398000	0	0	46237000	29398000	0	0	22864000
GLQGSLGEQR	10	0	1043.54	Q9DBF7	Q9DBF7	239	248	Cwc25	Pre-mRNA-splicing factor CWC25 homolog	yes	yes	2	0.0085275	66.568	0	0	0	0	0	0	0	0	0
GLQKEEIVLLTHGDSVDK	18	1	1980.05	Q3THK7	Q3THK7	142	159	Gmps	GMP synthase [glutamine-hydrolyzing]	yes	yes	3	0.006763	37.624	41566000	0	41566000	0	0	0	38830000	0	0
GLQTSQDAR	9	0	974.478	P14211	P14211	65	73	Calr	Calreticulin	yes	yes	2	0.00010484	135.77	40771000	0	0	40771000	0	0	0	19523000	0
GLSQSALPYR	10	0	1090.58	Q921R2;P62301;A0A0U1RQ71	Q921R2	10	19	Rps13	40S ribosomal protein S13	yes	no	2	5.2867e-10	143.01	339170000	94991000	70571000	102650000	70963000	94991000	65924000	49154000	35091000
GLSSDTKPMVNLDK	14	1	1503.76	Q9D1J3;A0A1W2P7G2	Q9D1J3	136	149	Sarnp	SAP domain-containing ribonucleoprotein	yes	no	2	0.0004111	94.767	242140000	0	0	104360000	137780000	0	0	49974000	68131000
GLSVLLFNDGTQGR	14	0	1475.77	Q8BWW3;Q9CYR6	Q8BWW3	231	244	Pgm3	Phosphoacetylglucosamine mutase	yes	no	2	0.016644	42.001	12062000	0	12062000	0	0	0	11268000	0	0
GLTPSQIGVILR	12	0	1252.75	Q921R2;P62301	Q921R2	44	55	Rps13	40S ribosomal protein S13	yes	no	2	0.0019346	73.985	149220000	0	0	72995000	76228000	0	0	34954000	37695000
GLTPTGMLPSGVLAGGR	17	0	1582.85	E0CZ78;P48453;E9Q6P2;G3X8U7	E0CZ78	434	450	Ppp3cb	Serine/threonine-protein phosphatase;Serine/threonine-protein phosphatase 2B catalytic subunit beta isoform	yes	no	2	0.0035982	43.544	21786000	0	0	21786000	0	0	0	10432000	0
GLTPTGMLPSGVLSGGK	17	0	1570.84	P63328	P63328	425	441	Ppp3ca	Serine/threonine-protein phosphatase 2B catalytic subunit alpha isoform	yes	yes	2	0.011755	36.847	22973000	0	22973000	0	0	0	21461000	0	0
GLTSVINQK	9	0	958.545	A0A6I8MX27;P16125	A0A6I8MX27	300	308	Ldhb	L-lactate dehydrogenase B chain	yes	no	2	0.0063407	100.45	28267000	13913000	14354000	0	0	13913000	13409000	0	0
GLVGEIIKR	9	1	983.613	Q5NC80;P15532;Q5NC79;E9PZF0;Q01768	E9PZF0	19	27	Nme1;Gm20390;Nme2	Nucleoside diphosphate kinase;Nucleoside diphosphate kinase A;Nucleoside diphosphate kinase B	no	no	2;3	0.024098	68.224	32844000	9856400	22988000	0	0	9856400	21474000	0	0
GLVLDHGAR	9	0	936.514	P80317;A0A571BEL9;Q61390;B1AT05	P80317	209	217	Cct6a;Cct6b	T-complex protein 1 subunit zeta;T-complex protein 1 subunit zeta-2	yes	no	2;3	0.00041843	130.77	235590000	0	0	91901000	143680000	0	0	44008000	71052000
GLVLIAFSQYLQK	13	0	1478.85	P07724	P07724	45	57	Alb	Serum albumin	yes	yes	2	0.001318	82.749	47427000	0	0	23018000	24409000	0	0	11022000	12070000
GLVLMSR	7	0	774.442	P35564	P35564	120	126	Canx	Calnexin	yes	yes	2	0.015239	129.96	56603000	0	0	56603000	0	0	0	27105000	0
GLVRAPQVYILPPPAEQLSR	20	1	2203.25	A0A075B5P3;A0A0A6YVP0;P01867	P01867	229	248	Ighg2b;Igh-3	Ig gamma-2B chain C region	no	no	3	8.9074e-06	72.421	1333600000	0	0	646130000	687450000	0	0	309410000	339940000
GLVRAPQVYILPPPAEQLSRK	21	2	2331.34	A0A075B5P3;A0A0A6YVP0;P01867	P01867	229	249	Ighg2b;Igh-3	Ig gamma-2B chain C region	no	no	4	0.0012247	35.703	112670000	0	0	53585000	59089000	0	0	25659000	29220000
GLVVPVIR	8	0	851.559	Q9D2G2	Q9D2G2	327	334	Dlst	Dihydrolipoyllysine-residue succinyltransferase component of 2-oxoglutarate dehydrogenase complex, mitochondrial	yes	yes	2	0.034424	88.734	20249000	8959200	11290000	0	0	8959200	10547000	0	0
GLVYETSVLDPDEGIR	16	0	1761.88	Q9CZU6;Q80X68	Q9CZU6	77	92	Cs;Csl	Citrate synthase, mitochondrial;Citrate synthase	yes	no	2	6.5796e-06	64.439	384260000	188860000	195400000	0	0	188860000	182540000	0	0
GLYDGPVCEVSVTPK	15	0	1619.79	O08553	O08553	497	511	Dpysl2	Dihydropyrimidinase-related protein 2	yes	yes	2	0.0014579	72.652	1244300000	600740000	643560000	0	0	600740000	601190000	0	0
GMAAAGNYAWVNR	13	0	1379.64	Q99LF4	Q99LF4	309	321	Rtcb	tRNA-splicing ligase RtcB homolog	yes	yes	2	0.016328	58.981	22018000	22018000	0	0	0	22018000	0	0	0
GMGGAFVLVLYDEIKK	16	1	1738.93	P48962;P51881	P48962	281	296	Slc25a4;Slc25a5	ADP/ATP translocase 1;ADP/ATP translocase 2;ADP/ATP translocase 2, N-terminally processed	no	no	3	0.00066753	55.885	103000000	0	0	57732000	45266000	0	0	27645000	22384000
GMGGAMDLVSSSK	13	0	1238.56	Q3UJQ9;Q9D0K2	Q3UJQ9	422	434	Oxct1	Succinyl-CoA:3-ketoacid-coenzyme A transferase;Succinyl-CoA:3-ketoacid coenzyme A transferase 1, mitochondrial	yes	no	2	0.032066	39.785	27167000	0	27167000	0	0	0	25378000	0	0
GMGLSLMR	8	0	863.436	P19096;A0A0U1RNJ1	P19096	505	512	Fasn	Fatty acid synthase;[Acyl-carrier-protein] S-acetyltransferase;[Acyl-carrier-protein] S-malonyltransferase;3-oxoacyl-[acyl-carrier-protein] synthase;3-oxoacyl-[acyl-carrier-protein] reductase;3-hydroxyacyl-[acyl-carrier-protein] dehydratase;Enoyl-[acyl-carrier-protein] reductase;Oleoyl-[acyl-carrier-protein] hydrolase	yes	no	2	0.03619	84.244	20707000	9578200	11129000	0	0	9578200	10396000	0	0
GMGPGTPAGYGR	12	0	1119.51	Q8VIJ6	Q8VIJ6	674	685	Sfpq	Splicing factor, proline- and glutamine-rich	yes	yes	2	0.0021073	72.243	49547000	12937000	0	36610000	0	12937000	0	17531000	0
GMSLNLEPDNVGVVVFGNDK	20	0	2103.03	Q03265;D3Z6F5	Q03265	104	123	Atp5a1	ATP synthase subunit alpha, mitochondrial;ATP synthase subunit alpha	yes	no	2	0.00010575	52.265	98665000	0	0	52910000	45756000	0	0	25336000	22626000
GMSVYGLGR	9	0	938.464	A0A0G2JDV8;Q9DAW9	A0A0G2JDV8	211	219	Cnn3	Calponin-3	yes	no	2	0.013503	82.671	11538000	0	11538000	0	0	0	10778000	0	0
GMTTVDDFFQGTK	13	0	1445.65	Q3TT92;E9PWE8;Q62188	Q3TT92	80	92	Dpysl3	Dihydropyrimidinase-related protein 3	yes	no	2	0.0015971	86.014	1264300000	335340000	366540000	272780000	289610000	335340000	342410000	130620000	143210000
GMYDGPVFDLTTTPK	15	0	1640.78	Q3TT92;E9PWE8;Q62188	Q3TT92	495	509	Dpysl3	Dihydropyrimidinase-related protein 3	yes	no	2	0.0028452	56.225	1093000000	386490000	0	395930000	310610000	386490000	0	189600000	153590000
GMYDGPVYEVPATPK	15	0	1622.77	P97427;Q6P1J1	Q6P1J1	611	625	Crmp1	Dihydropyrimidinase-related protein 1	no	no	2	0.0014773	69.01	731450000	370780000	360670000	0	0	370780000	336920000	0	0
GNDISSGTVLSDYVGSGPPSGTGLHR	26	0	2529.21	P70296	P70296	94	119	Pebp1	Phosphatidylethanolamine-binding protein 1;Hippocampal cholinergic neurostimulating peptide	yes	yes	3	0.00048939	29.269	643610000	202560000	204440000	111060000	125560000	202560000	190980000	53180000	62089000
GNFGGSFAGSFGGAGGHAPGVAR	23	0	2033.95	Q9D0E1;B8JK33;B8JK32	Q9D0E1	627	649	Hnrnpm	Heterogeneous nuclear ribonucleoprotein M	yes	no	3	0.0038556	33.348	107410000	107410000	0	0	0	107410000	0	0	0
GNFNYIEFTR	10	0	1259.59	Q6ZWQ9;Q3THE2	Q6ZWQ9	152	161	Myl12a;Myl12b	Myosin regulatory light chain 12B	yes	no	2	0.022076	78.516	100580000	20544000	19529000	0	60503000	20544000	18243000	0	29919000
GNHECASINR	10	0	1156.5	P62137;P62141;P63087;A0A0G2JGC1;A0A0G2JFF1	P63087	123	132	Ppp1ca;Ppp1cb;Ppp1cc	Serine/threonine-protein phosphatase PP1-alpha catalytic subunit;Serine/threonine-protein phosphatase PP1-beta catalytic subunit;Serine/threonine-protein phosphatase PP1-gamma catalytic subunit	no	no	2;3	0.0016708	73.985	119790000	53226000	66566000	0	0	53226000	62183000	0	0
GNKPWISLPR	10	1	1166.66	P62702	P62702	231	240	Rps4x	40S ribosomal protein S4, X isoform	yes	yes	2;3	0.022039	66.692	340230000	20775000	51391000	105130000	162940000	20775000	48007000	50340000	80572000
GNLYSFGCPEYGQLGHNSDGK	21	0	2299	Q8BK67	Q8BK67	271	291	Rcc2	Protein RCC2	yes	yes	3	0.00048478	42.123	302000000	0	130130000	84251000	87625000	0	121560000	40344000	43330000
GNPSAAAGPK	10	0	868.44	O88809;Q6PGI2;Q9CXL6	O88809	276	285	Dcx	Neuronal migration protein doublecortin	yes	no	2	0.011999	71.379	39840000	0	39840000	0	0	0	37217000	0	0
GNPTVEVDLYTAK	13	0	1405.71	P17182;B0QZL1;B1ARR7;D3Z2S4;A0A0N4SUX5;P17183;A0A0N4SUW8;A0A0N4SUI6;B1ARR6;D3YVD3;D3Z6E4	P17182	16	28	Eno1;Eno2	Alpha-enolase;Enolase;Gamma-enolase	yes	no	2	0.011201	48.004	162960000	162960000	0	0	0	162960000	0	0	0
GNRPGYAGAPK	11	1	1086.56	P32067;F6SXM5	P32067	357	367	Ssb	Lupus La protein homolog	yes	no	2;3	0.0063047	64.711	118430000	0	0	75168000	43260000	0	0	35995000	21392000
GNSIIMLEALER	12	0	1344.71	P62309	P62309	64	75	Snrpg	Small nuclear ribonucleoprotein G	yes	yes	2	0.001262	93.096	40142000	0	0	0	40142000	0	0	0	19850000
GNSIIMLEALERV	13	1	1443.78	P62309	P62309	64	76	Snrpg	Small nuclear ribonucleoprotein G	yes	yes	2	0.0071816	90.685	329780000	0	0	168880000	160900000	0	0	80867000	79566000
GNVGFVFTKEDLTEIR	16	1	1823.94	P14869;D3YVM5;S4R1N1	P14869	84	99	Rplp0	60S acidic ribosomal protein P0	yes	no	3	0.00067457	98.312	41770000	0	0	0	41770000	0	0	0	20655000
GNVGVVLFNFGK	12	0	1249.68	Q9CQ43;Q8VCG1	Q9CQ43	105	116	Dut		yes	no	2	0.021951	45.137	11984000	0	11984000	0	0	0	11195000	0	0
GNVVFGEPITASLGIDGTHYWSK	23	0	2447.21	Q3TT92;E9PWE8;Q62188	Q3TT92	269	291	Dpysl3	Dihydropyrimidinase-related protein 3	yes	no	3	0.020771	26.627	101320000	0	0	0	101320000	0	0	0	50101000
GNVVPSPLPTR	11	0	1135.63	Q9CR86	Q9CR86	37	47	Carhsp1	Calcium-regulated heat stable protein 1	yes	yes	2	0.0049355	64.654	38907000	20109000	18798000	0	0	20109000	17561000	0	0
GPAVGIDLGTTYSCVGVFQHGK	22	0	2262.11	P63017;Q504P4;D3Z5E2	P63017	4	25	Hspa8	Heat shock cognate 71 kDa protein	yes	no	3	6.4969e-08	65.808	470380000	0	0	470380000	0	0	0	225250000	0
GPDGLTALEATDNQAIK	17	0	1712.86	P62774	P62774	98	114	Mtpn	Myotrophin	yes	yes	3	0.00034712	52.522	32381000	0	32381000	0	0	0	30249000	0	0
GPDPEPTQPGTVK	13	0	1321.65	P13595;A0A0A6YY91	P13595	982	994	Ncam1	Neural cell adhesion molecule 1	yes	no	2	5.0746e-05	113.93	262910000	0	0	124810000	138100000	0	0	59765000	68291000
GPEGERPAR	9	1	967.484	A0A3B2W864;A0A338P7K4;Q3UW83;P63325	P63325	108	116	Rps10	40S ribosomal protein S10	no	no	2;3	0.010119	90.657	60129000	35773000	24355000	0	0	35773000	22752000	0	0
GPFLLGIK	8	0	843.522	P28271	P28271	786	793	Aco1	Cytoplasmic aconitate hydratase	yes	yes	2	0.038796	76.847	20554000	10531000	0	10023000	0	10531000	0	4799400	0
GPFTDVVTTNLK	12	0	1290.68	Q9WV55;Q8BH80;Q9QY76	Q9WV55	27	38	Vapa;Vapb	Vesicle-associated membrane protein-associated protein A;Vesicle-associated membrane protein-associated protein B	no	no	2	0.012677	51.436	50815000	0	0	0	50815000	0	0	0	25128000
GPGGQQPPQHR	11	0	1157.57	Q6R891	Q6R891	271	281	Ppp1r9b	Neurabin-2	yes	yes	2;3	0.00078157	54.539	12848000	0	0	7364000	5483600	0	0	3526300	2711600
GPLLEEQALSK	11	0	1183.64	Q80VD1	Q80VD1	27	37	Fam98b	Protein FAM98B	yes	yes	2	0.0019148	76.943	123810000	53487000	0	70319000	0	53487000	0	33673000	0
GPLLVQDVVFTDEMAHFDR	19	0	2188.06	P24270;A2AL20	P24270	48	66	Cat	Catalase	yes	no	3	0.0020412	38.418	60362000	0	0	60362000	0	0	0	28905000	0
GPLMMYISK	9	0	1038.52	P58252	P58252	392	400	Eef2	Elongation factor 2	yes	yes	2	0.027198	58.981	0	0	0	0	0	0	0	0	0
GPLPAAPPTAPER	13	0	1272.68	Q99P72	Q99P72	90	102	Rtn4	Reticulon-4	yes	yes	2	0.035214	35.652	30693000	0	30693000	0	0	0	28673000	0	0
GPLQSVQVFGR	11	0	1186.65	P14131	P14131	5	15	Rps16	40S ribosomal protein S16	yes	yes	2	0.00028476	126.41	447720000	95470000	120810000	124320000	107130000	95470000	112850000	59530000	52973000
GPLRPFVPEQELLR	14	1	1649.93	Q8K341;F6RPX5	Q8K341	280	293	Atat1	Alpha-tubulin N-acetyltransferase 1	yes	no	3	0.0012823	74.537	23707000	0	0	0	23707000	0	0	0	11723000
GPLSQAPTPAPK	12	0	1162.63	Q7TQE2;Q62523	Q7TQE2	214	225	Zyx	Zyxin	yes	no	2	0.0075394	56.432	24878000	0	0	24878000	0	0	0	11913000	0
GPLVFGEPIAASLGTDGTHYWSK	23	0	2402.19	P97427;Q6P1J1	Q6P1J1	385	407	Crmp1	Dihydropyrimidinase-related protein 1	no	no	3	1.1036e-08	95.48	585800000	0	0	294780000	291020000	0	0	141160000	143910000
GPMQLSADAR	10	0	1044.5	Q7TSJ2;D3Z6W1	Q7TSJ2	202	211	Map6	Microtubule-associated protein 6	yes	no	2	0.0016636	109.71	18209000	9240400	8968900	0	0	9240400	8378400	0	0
GPNKHTLTQIK	11	1	1235.7	P80317;A0A571BEL9	P80317	378	388	Cct6a	T-complex protein 1 subunit zeta	yes	no	2	4.1615e-09	118.67	0	0	0	0	0	0	0	0	0
GPPDFSSDEEREPTPVLGSGASVGR	25	1	2542.19	Q61029;Q61033	Q61029	61	85	Tmpo	Lamina-associated polypeptide 2, isoforms beta/delta/epsilon/gamma;Lamina-associated polypeptide 2, isoforms alpha/zeta	yes	no	3	0.00038008	42.863	39219000	0	0	39219000	0	0	0	18780000	0
GPPPSYGGSSR	11	0	1060.49	A0A2I3BRL8;Q91VM5;S4R1F6	A0A2I3BRL8	296	306	Rbmxl1;Rbmx	RNA binding motif protein, X-linked-like-1	no	no	2	0.00016764	111.06	99490000	18178000	15103000	34284000	31925000	18178000	14109000	16417000	15787000
GPQLFHMDPSGTFVQCDAR	19	0	2161.97	Q9Z2U1	Q9Z2U1	150	168	Psma5	Proteasome subunit alpha type-5	yes	yes	3	2.2277e-05	61.87	283460000	0	30915000	110130000	142410000	0	28880000	52739000	70422000
GPSIALDTACSSSLLALQNAYQAIR	25	0	2619.33	P19096;A0A0U1RNJ1	P19096	152	176	Fasn	Fatty acid synthase;[Acyl-carrier-protein] S-acetyltransferase;[Acyl-carrier-protein] S-malonyltransferase;3-oxoacyl-[acyl-carrier-protein] synthase;3-oxoacyl-[acyl-carrier-protein] reductase;3-hydroxyacyl-[acyl-carrier-protein] dehydratase;Enoyl-[acyl-carrier-protein] reductase;Oleoyl-[acyl-carrier-protein] hydrolase	yes	no	3	9.8779e-12	50.531	40737000	0	0	40737000	0	0	0	19507000	0
GPSLNPVLDYDHGSR	15	0	1625.78	Q8K310;A0A494BAZ2	Q8K310	193	207	Matr3	Matrin-3	yes	no	3	0.0080728	36.928	9859200	9859200	0	0	0	9859200	0	0	0
GPSSVEDIK	9	0	930.466	Q61937;Q9DAY9;Q5SQB0;Q5SQB5	Q61937	238	246	Npm1	Nucleophosmin	yes	no	2	0.014778	81.296	161770000	86633000	75138000	0	0	86633000	70191000	0	0
GQDIFIIQTIPR	12	0	1399.78	B1AT82;Q9D0M1;B1AT84	B1AT82	86	97	Prpsap1	Phosphoribosyl pyrophosphate synthase-associated protein 1	yes	no	2	0.011436	52.278	8854100	8854100	0	0	0	8854100	0	0	0
GQETSTNPIASIFAWSR	17	0	1863.91	O88844	O88844	322	338	Idh1	Isocitrate dehydrogenase [NADP] cytoplasmic	yes	yes	2	0.011755	36.847	7932800	7932800	0	0	0	7932800	0	0	0
GQFSTDELVAEVEKR	15	1	1706.85	Q5SXR6;Q68FD5	Q5SXR6	842	856	Cltc	Clathrin heavy chain;Clathrin heavy chain 1	yes	no	3	0.0085005	40.242	41656000	0	0	0	41656000	0	0	0	20599000
[truncated: 4,037 more rows]
